# Supplementary material for: Expression of the FUS-CHOP Fusion Protein in Primary Mesenchymal Progenitor Cells Gives Rise to a Model of Myxoid Liposarcoma
Source: Oxford University Press journal article supplement (doi:10.1158/0008-5472.can-05-3979), 2006-07-15
Supplement: 00085472can053979-sup-supplementary_data_2.xls [file 00085472can053979-sup-supplementary_data_2.xls]

## Sheet: Lipo fdr 05 up
MPCs FUS-CHOP TUMOR First Round Vs MPCs FUS-CHOP before injection FDR 5% induced transcripts
clone	M	t	pvalue	adjpv	UniGene	Gene.name	RefSeq	GeneBank	Annotation
H3014D06	1.58268	133.564	9.2537e-07	0.00762089	Mm.9239	Zfp219	NM_027248.1	NA	zinc finger protein 219
H3111E01	1.00395	87.8988	3.24578e-06	0.0120027	Mm.245948	D2Ertd97e	NM_178693.2	NA	DNA segment, Chr 2, ERATO Doi 97, expressed
H3008B08	1.4219	77.2884	4.77382e-06	0.0120027	Mm.231802	Pura	NM_008989.1	NA	purine rich element binding protein A
H3114H08	4.02907	71.2265	6.09872e-06	0.0120027	Mm.271652	Lrrc17	NA	BY311470.1	leucine rich repeat containing 17
H3111A09	1.3039	67.1204	7.28718e-06	0.0120027	Mm.251303	BC006583	NM_145574.1	NA	cDNA sequence BC006583
H3057F11	4.6344	61.5877	9.43139e-06	0.0121278	Mm.9749	Blnk	NM_008528.3	NA	B-cell linker
H3018F07	1.7811	61.2844	9.57205e-06	0.0121278	Mm.276859	Coro1b	NM_011778.1	NA	coronin, actin binding protein 1B
H3149G05	1.50925	56.3244	1.23279e-05	0.0130235	Mm.250419	Ccni	NM_017367.2	NA	cyclin I
H3128F12	0.9468	54.3332	1.37323e-05	0.0130235	Mm.258140	Dnajc7	NM_019795.3	NA	DnaJ (Hsp40) homolog, subfamily C, member 7
H3102H07	0.44175	51.5557	1.60714e-05	0.0130235	Mm.282863	Bpgm	NM_007563.2	NA	2,3-bisphosphoglycerate mutase
H3066G03	3.5423	49.7974	1.78329e-05	0.0130235	NA	NA	NA	NA	EST
H3050G04	1.7373	49.1128	1.85883e-05	0.0130235	Mm.21440	Dpp7	NM_031843.2	NA	dipeptidylpeptidase 7
H3065B06	3.02183	47.9206	2.00089e-05	0.0130235	NA	NA	NA	NA	EST
H3154H07	3.36903	47.6361	2.03692e-05	0.0130235	NA	NA	NA	NA	EST
H3102E09	1.63977	47.332	2.07638e-05	0.0130235	Mm.18359	NA	NA	AU023249.1	Mus musculus transcribed sequence with moderate similarity to protein ref:NP_004955.2 (H.sapiens) histone deacetylase 1; reduced potassium dependency, yeast homolog-like 1 [Homo sapiens]
H3076H03	1.31672	47.0183	2.11818e-05	0.0130235	Mm.101274	2010008E23Rik	NA	AK053165.1	RIKEN cDNA 2010008E23 gene
H3109D06	0.4861	46.055	2.25374e-05	0.0130235	Mm.165807	F8a	NM_007978.1	NA	factor 8-associated gene A
H3101A05	3.52205	45.7903	2.29301e-05	0.0130235	Mm.26700	AU040576	NM_178642.3	NA	expressed sequence AU040576
H3096H12	2.92678	43.5661	2.66196e-05	0.0134031	Mm.4141	Vldlr	NM_013703.1	NA	very low density lipoprotein receptor
N836	1.37353	43.2316	2.72416e-05	0.0134031	Mm.29854	Hdac6	NM_010413.2	NA	histone deacetylase 6
H3150C09	1.64135	42.5943	2.84809e-05	0.0134031	Mm.46653	1500004A08Rik	NM_178149.1	NA	RIKEN cDNA 1500004A08 gene
H3113F12	1.4743	41.1993	3.14688e-05	0.0143978	Mm.648	Prnp	NM_011170.1	NA	prion protein
H3097H08	1.1217	39.5417	3.55881e-05	0.0152794	Mm.12145	Rbbp4	NM_009030.1	NA	retinoblastoma binding protein 4
P560	1.86862	39.4111	3.59426e-05	0.0152794	Mm.3433	Ecm1	NM_007899.1	NA	extracellular matrix protein 1
H3102H11	5.07545	39.0816	3.68579e-05	0.0152794	Mm.274715	2310045O21Rik	NA	BC027675.1	RIKEN cDNA 2310045O21 gene
H3089H07	4.34185	38.9941	3.71062e-05	0.0152794	Mm.221992	Yap	NM_009534.1	NA	yes-associated protein
H3028D04	0.32325	37.6984	4.10583e-05	0.0157273	Mm.4419	Rpl5	NM_016980.1	NA	ribosomal protein L5
H3026C09	1.0519	36.9716	4.35235e-05	0.0162926	Mm.287370	Usp21	NA	AK049649.1	ubiquitin specific protease 21
H3139G04	1.3466	36.2394	4.62103e-05	0.016914	Mm.78312	8030445B08Rik	NA	AK042432.1	RIKEN cDNA 8030445B08 gene
H3146C02	1.46917	35.2959	5.00088e-05	0.0170753	Mm.2675	Pdgfa	NM_008808.2	NA	platelet derived growth factor, alpha
H3060C11	3.81442	34.7277	5.24986e-05	0.0170753	Mm.209917	Smox	NM_145533.1	NA	spermine oxidase
H3151C02	0.948125	34.3883	5.40651e-05	0.0170753	Mm.6822	Edr1	NM_007905.1	NA	early development regulator 1 (homolog of polyhomeotic 1)
H3073D03	0.675325	34.1644	5.51332e-05	0.0170753	Mm.250569	AA792894	NM_145568.2	NA	EST AA792894
H3021C01	1.46667	33.9898	5.59851e-05	0.0170753	Mm.8040	Prkch	NM_008856.2	NA	protein kinase C, eta
H3148C04	0.9068	33.3225	5.94091e-05	0.0171671	Mm.270088	AW547365	NM_133891.1	NA	expressed sequence AW547365
H3027G12	1.06242	32.9115	6.16573e-05	0.0175096	Mm.4048	Myd116	NM_008654.1	NA	myeloid differentiation primary response gene 116
H3094D02	1.0699	32.0264	6.68998e-05	0.0177727	Mm.2344	Gnb1	NM_008142.2	NA	guanine nucleotide binding protein, beta 1
P566	1.69742	31.5542	6.99412e-05	0.0182247	Mm.2675	Pdgfa	NM_008808.2	NA	platelet derived growth factor, alpha
T097	1.81228	31.4236	7.08141e-05	0.0182247	Mm.3204	Fdft1	NM_010191.2	NA	farnesyl diphosphate farnesyl transferase 1
H3116B06	2.28547	30.8912	7.45296e-05	0.0185864	Mm.203898	Snn	NM_009223.1	NA	stannin
H3120E07	1.01365	30.536	7.71543e-05	0.0185864	Mm.20144	Serpinb1a	NM_025429.1	NA	serine (or cysteine) proteinase inhibitor, clade B, member 1a
H3021D12	3.2933	30.3376	7.86736e-05	0.0185864	Mm.36718	Nubp2	NM_011956.2	NA	nucleotide binding protein 2
H3067A08	1.07187	30.0776	8.07263e-05	0.0185864	Mm.296382	Csad	NM_144942.1	NA	cysteine sulfinic acid decarboxylase
H3042F12	2.9081	29.8224	8.2811e-05	0.0185864	Mm.3093	Serpine2	NM_009255.2	NA	serine (or cysteine) proteinase inhibitor, clade E, member 2
H3024A10	2.2475	29.7077	8.37716e-05	0.0185864	Mm.20837	Cln2	NM_009906.2	NA	ceroid-lipofuscinosis, neuronal 2
H3111A12	1.35795	29.6521	8.42419e-05	0.0185864	Mm.289680	1110068E11Rik	NM_026859.2	NA	RIKEN cDNA 1110068E11 gene
H3003B04	0.80115	29.6063	8.46324e-05	0.0185864	Mm.325667	NA	NA	BY418760.1	Mus musculus transcribed sequence with weak similarity to protein sp:Q9R233 (M.musculus) TPSN_MOUSE Tapasin precursor (TPSN) (TPN) (TAP-binding protein) (TAP-associated protein)
H3066A06	1.59712	29.4497	8.59862e-05	0.0186352	Mm.21965	D5Ertd593e	NM_175096.2	NA	DNA segment, Chr 5, ERATO Doi 593, expressed
H3102B07	0.544925	29.0847	8.92544e-05	0.0186861	Mm.261679	A630026H08Rik	NM_175689.2	NA	RIKEN cDNA A630026H08 gene
H3040H12	3.03905	28.8652	9.13006e-05	0.0186861	Mm.172719	NA	NA	C78661.1	Mus musculus transcribed sequences
H3049D03	1.4994	28.0353	9.96254e-05	0.0193403	Mm.248906	Sca10	NM_016843.1	NA	spinocerebellar ataxia 10 homolog (human)
H3016C07	1.3932	27.7424	0.000102804	0.0193403	Mm.2769	Mlp	NM_010807.2	NA	MARCKS-like protein
H3005H08	2.7391	27.6666	0.000103649	0.0193403	Mm.4141	Vldlr	NM_013703.1	NA	very low density lipoprotein receptor
H3031E05	0.908	27.5463	0.000105009	0.0193403	Mm.291928	Catnb	NM_007614.2	NA	catenin beta
H3050D03	1.23388	27.4531	0.000106078	0.0193403	NA	NA	NA	NA	EST
H3121H02	1.09333	27.229	0.000108711	0.0193403	NA	NA	NA	NA	EST
T055	0.737275	26.8752	0.000113046	0.0193403	Mm.18522	Cpt1a	NM_013495.1	NA	carnitine palmitoyltransferase 1a, liver
H3141H01	0.5053	26.6787	0.000115554	0.0193403	Mm.163885	AA415817	NM_178853.2	NA	expressed sequence AA415817
H3088C07	3.03	26.511	0.000117754	0.0193403	Mm.9889	NA	NA	BY361600.1	Mus musculus similar to 1-aminocyclopropane-1-carboxylate synthase (LOC381411), mRNA
H3074B05	1.24228	26.5067	0.00011781	0.0193403	Mm.28761	Stk25	NM_021537.2	NA	serine/threonine kinase 25 (yeast)
H3124D03	0.71935	26.415	0.000119037	0.0193403	Mm.284042	NA	NA	BY033804.1	Mus musculus similar to RIKEN cDNA 9030221M09 gene (LOC272701), mRNA
H3012D08	0.55755	25.8962	0.00012631	0.0193861	Mm.18946	Ap2m1	NM_009679.1	NA	adaptor protein complex AP-2, mu1
H3053C11	3.0856	25.7686	0.000128189	0.0193861	NA	NA	NA	NA	EST
P719	2.41262	25.6737	0.00012961	0.0193861	Mm.2154	Mxi1	NM_010847.1	NA	Max interacting protein 1
H3099E01	0.968125	25.5213	0.000131938	0.0193861	NA	NA	NA	NA	EST
H3085F09	0.7788	25.2919	0.000135546	0.0193861	Mm.227474	AA960558	NM_133942.1	NA	expressed sequence AA960558
P770	1.41102	25.2308	0.00013653	0.0193861	Mm.86483	Spry1	NM_011896.1	NA	sprouty homolog 1 (Drosophila)
H3151E09	0.84995	25.0514	0.000139473	0.0196347	Mm.260791	NA	NA	AK008369.1	Mus musculus adult male small intestine cDNA, RIKEN full-length enriched library, clone:2010109N14 product:unknown EST, full insert sequence
H3031D03	1.00385	24.836	0.000143119	0.0199773	Mm.275831	Aldo1	NM_007438.2	NA	aldolase 1, A isoform
H3042G08	0.76675	24.6553	0.000146276	0.0202463	Mm.28468	Gpr108	NM_030084.2	NA	G protein-coupled receptor 108
H3112H06	0.519025	24.425	0.000150437	0.0206487	Mm.27567	BC017607	NM_144924.1	NA	cDNA sequence BC017607
H3110A12	1.07482	24.3344	0.000152115	0.0207065	Mm.24684	Fosl2	NM_008037.2	NA	fos-like antigen 2
H3012C02	0.33855	24.1665	0.000155296	0.0209662	Mm.248827	Canx	NM_007597.2	NA	calnexin
H3044G12	3.16883	24.0834	0.000156902	0.0210108	NA	NA	NA	NA	EST
H3013F12	1.0579	23.8517	0.0001615	0.0213965	Mm.294672	Snx15	NM_026912.1	NA	sorting nexin 15
H3008H06	1.99327	23.7302	0.000163981	0.0213965	Mm.231395	Ctsd	NM_009983.2	NA	cathepsin D
T240	4.09237	23.7272	0.000164043	0.0213965	Mm.28262	Rgs2	NM_009061.2	NA	regulator of G-protein signaling 2
H3054D12	3.74047	23.5613	0.00016752	0.0214154	NA	NA	NA	NA	EST
H3082D06	1.2488	23.4522	0.000169858	0.0214154	Mm.286536	2410043F08Rik	NM_133754.1	NA	RIKEN cDNA 2410043F08 gene
H3049B08	2.15148	23.3166	0.000172826	0.0214154	Mm.279920	Tes	NM_011570.2	NA	testis derived transcript
T176	1.75297	23.3128	0.000172909	0.0214154	Mm.238143	Ralgds	NM_009058.1	NA	ral guanine nucleotide dissociation stimulator
H3094H01	2.3285	23.3121	0.000172925	0.0214154	Mm.83981	4933428L19Rik	NA	AK076525.1	RIKEN cDNA 4933428L19 gene
H3132H09	0.928325	23.1326	0.000176963	0.0215908	Mm.7070	Nudt14	NM_025399.1	NA	nudix (nucleoside diphosphate linked moiety X)-type motif 14
P650	1.13138	22.7167	0.000186816	0.0222657	Mm.3798	Fah	NM_010176.1	NA	fumarylacetoacetate hydrolase
H3114E06	5.66925	22.5209	0.000191707	0.0223943	Mm.14455	Tgfbi	NM_009369.1	NA	transforming growth factor, beta induced
P823	1.56333	22.3764	0.000195427	0.0224124	Mm.16716	Lamp1	NM_010684.1	NA	lysosomal membrane glycoprotein 1
H3155C07	1.54743	22.2465	0.000198854	0.0224124	Mm.27385	1810036L03Rik	NM_026960.1	NA	RIKEN cDNA 1810036L03 gene
H3075H07	3.5684	22.0952	0.000202949	0.0225186	Mm.234769	Dpp3	NM_133803.1	NA	dipeptidylpeptidase 3
H3092F08	3.4259	22.0675	0.000203708	0.0225186	NA	NA	NA	NA	EST
H3002F03	0.7571	21.991	0.000205833	0.0226018	Mm.16479	Dusp9	NM_029352.3	NA	dual specificity phosphatase 9
H3013B04	2.63788	21.9077	0.000208176	0.0226185	Mm.24576	B230106I24Rik	NM_178772.2	NA	RIKEN cDNA B230106I24 gene
H3048E05	1.11502	21.208	0.000229353	0.0238814	Mm.271071	Lta4h	NM_008517.1	NA	leukotriene A4 hydrolase
H3038F10	0.811375	20.9035	0.000239467	0.0244985	NA	NA	NA	NA	EST
H3016D10	2.07273	20.6563	0.000248119	0.0250034	NA	NA	NA	NA	EST
H3079D12	1.32397	20.6355	0.000248865	0.0250034	Mm.6483	Pld3	NM_011116.1	NA	phospholipase D3
H3109G08	2.05932	20.4996	0.000253821	0.0250341	NA	NA	NA	NA	EST
H3056H08	3.7649	20.2704	0.000262479	0.0255816	NA	NA	NA	NA	EST
H3020H07	1.59522	20.166	0.000266552	0.0257634	Mm.205830	Gdi1	NM_010273.1	NA	guanosine diphosphate (GDP) dissociation inhibitor 1
H3023G06	1.29458	19.9797	0.000274033	0.0259402	Mm.2941	Mttp	NM_008642.1	NA	microsomal triglyceride transfer protein
H3032C10	0.720625	19.7664	0.000282944	0.0265172	Mm.260207	Hmgcr	NA	AK051107.1	3-hydroxy-3-methylglutaryl-Coenzyme A reductase
H3015D03	1.30865	19.7388	0.000284126	0.0265172	Mm.197225	NA	NA	BG064088.1	Mus musculus transcribed sequences
H3008A02	0.922175	19.6951	0.00028601	0.0265172	Mm.296082	Slc25a11	NM_024211.2	NA	solute carrier family 25 (mitochondrial carrier; oxoglutarate carrier), member 11
H3120F07	0.47135	19.6822	0.000286568	0.0265172	Mm.210845	Unc84a	NM_024451.1	NA	unc-84 homolog A (C. elegans)
H3043C11	1.26883	19.6179	0.00028938	0.0265242	NA	NA	NA	NA	EST
H3014D03	0.7112	19.531	0.000293233	0.0265242	Mm.271922	Brms1	NM_134155.1	NA	breast cancer metastasis-suppressor 1
H3130C01	1.85285	19.3922	0.000299535	0.0265249	NA	NA	NA	NA	EST
H3113A12	0.62705	19.3287	0.00030248	0.0266425	Mm.270065	Gas5	NM_013525.1	NA	growth arrest specific 5
P147	1.8846	19.2105	0.000308057	0.0269894	Mm.46248	Pyy	NM_145435.1	NA	peptide YY
P323	3.03697	19.0822	0.000314272	0.0270794	Mm.3093	Serpine2	NM_009255.2	NA	serine (or cysteine) proteinase inhibitor, clade E, member 2
H3016G02	0.623275	19.0478	0.00031597	0.0270794	Mm.301286	AB041549	NM_021435.1	NA	hypothetical protein, MNCb-4414
H3034F08	3.12215	19.0208	0.000317305	0.0270794	Mm.207446	Arhgef3	NM_027871.1	NA	Rho guanine nucleotide exchange factor (GEF) 3
H3036B03	1.39142	18.9594	0.000320381	0.0270944	Mm.248906	Sca10	NM_016843.1	NA	spinocerebellar ataxia 10 homolog (human)
H3121B07	1.47418	18.838	0.000326573	0.0270944	NA	NA	NA	NA	EST
P585	0.757125	18.779	0.00032964	0.0270944	Mm.163	B2m	NM_009735.2	NA	beta-2 microglobulin
H3124C08	1.5175	18.7107	0.000333235	0.0270944	Mm.10433	Aip	NM_016666.1	NA	aryl-hydrocarbon receptor-interacting protein
H3086F08	0.693075	18.6705	0.000335377	0.0270944	Mm.116889	4732435N03Rik	NM_172753.2	NA	RIKEN cDNA 4732435N03 gene
H3067H02	3.4041	18.5975	0.000339315	0.0270944	NA	NA	NA	NA	EST
H3127C06	1.02388	18.5622	0.000341241	0.0270944	Mm.8766	2410004H05Rik	NM_029626.1	NA	RIKEN cDNA 2410004H05 gene
H3114H07	0.5482	18.5521	0.000341798	0.0270944	Mm.30800	Eif2c1	NM_153403.1	NA	eukaryotic translation initiation factor 2C, 1
H3066F01	4.04905	18.3592	0.000352605	0.0270944	Mm.28262	Rgs2	NM_009061.2	NA	regulator of G-protein signaling 2
H3021H12	1.34993	18.2933	0.000356401	0.0270944	Mm.276407	E430025E21Rik	NM_153548.1	NA	RIKEN cDNA E430025E21 gene
H3053D10	0.7239	18.2607	0.000358302	0.0270944	NA	NA	NA	NA	EST
H3088D04	1.14302	18.1686	0.000363741	0.0270944	Mm.46653	1500004A08Rik	NM_178149.1	NA	RIKEN cDNA 1500004A08 gene
H3127H02	1.16762	18.0822	0.000368939	0.0270944	Mm.512	Wbp5	NM_011712.1	NA	WW domain binding protein 5
H3049G07	0.86355	18.0628	0.000370119	0.0270944	Mm.28768	Ptges	NM_022415.1	NA	prostaglandin E synthase
H3118H07	0.67395	18.0317	0.000372025	0.0271134	Mm.23492	Ccnl2	NM_018856.1	NA	cyclin L2
H3075B03	2.90525	17.9662	0.000376078	0.027288	NA	NA	NA	NA	EST
H3134G09	1.26995	17.7822	0.000387783	0.0279504	Mm.297964	NA	NA	AK034388.1	Mus musculus adult male diencephalon cDNA, RIKEN full-length enriched library, clone:9330185J12 product:unknown EST, full insert sequence
H3056E08	3.01585	17.7397	0.000390559	0.0279504	Mm.3238	Ampd3	NM_009667.1	NA	AMP deaminase 3
H3114G02	1.65043	17.6932	0.000393624	0.0279504	Mm.78312	8030445B08Rik	NA	AK042432.1	RIKEN cDNA 8030445B08 gene
H3039B09	0.949525	17.6922	0.000393691	0.0279504	Mm.22584	Strap	NM_011499.1	NA	serine/threonine kinase receptor associated protein
H3134E06	3.07172	17.6	0.000399862	0.0282667	NA	NA	NA	NA	EST
H3040B03	2.24757	17.4693	0.000408834	0.0286549	Mm.27842	Slc9a3r1	NM_012030.1	NA	solute carrier family 9 (sodium/hydrogen exchanger), isoform 3 regulator 1
H3081C04	1.48572	17.377	0.000415327	0.0286794	Mm.27120	LOC228071	NM_175465.2	NA	hypothetical protein LOC228071
H3013A07	0.93965	17.3001	0.000420852	0.0286794	Mm.137966	2410195B05Rik	NA	AK088097.1	RIKEN cDNA 2410195B05 gene
H3022B02	2.18383	17.2719	0.000422896	0.0286794	Mm.127744	NA	NA	AK048868.1	Mus musculus 0 day neonate cerebellum cDNA, RIKEN full-length enriched library, clone:C230077J22 product:unknown EST, full insert sequence
T072	2.1702	17.2474	0.000424686	0.0286794	Mm.10124	Chkl	NM_007692.2	NA	choline kinase-like
H3040A01	1.7907	17.1337	0.000433131	0.0286794	Mm.252213	Baz2a	NM_054078.1	NA	bromodomain adjacent to zinc finger domain, 2A
H3074A02	4.28742	17.1173	0.000434363	0.0286794	Mm.2026	Birc2	NM_007464.1	NA	baculoviral IAP repeat-containing 2
H3090D06	1.21495	17.1052	0.000435277	0.0286794	Mm.273062	BC038286	NM_170755.1	NA	cDNA sequence BC038286
H3154B01	0.403225	17.008	0.000442727	0.0290524	Mm.304895	NA	NA	CK335228.1	Mus musculus transcribed sequence with weak similarity to protein ref:NP_081764.1 (M.musculus) RIKEN cDNA 5730493B19 [Mus musculus]
H3083B01	0.722975	16.9411	0.000447948	0.0291457	Mm.276382	Ube4b	NM_022022.1	NA	ubiquitination factor E4B, UFD2 homolog (S. cerevisiae)
H3156H05	0.207375	16.9019	0.000451047	0.0291457	Mm.133966	NA	NA	AW558418.1	Mus musculus transcribed sequences
H3094E10	1.34478	16.8261	0.000457112	0.0291825	Mm.30119	Sc4mol	NM_025436.1	NA	sterol-C4-methyl oxidase-like
H3119F10	3.3107	16.7623	0.00046231	0.0292089	NA	NA	NA	NA	EST
H3055A01	1.7112	16.7558	0.000462845	0.0292089	Mm.30221	Insig1	NM_153526.2	NA	insulin induced gene 1
H3003F05	1.8539	16.6463	0.000471955	0.0292823	Mm.8856	Neu1	NM_010893.2	NA	neuraminidase 1
H3111C09	0.981775	16.5605	0.000479272	0.0292823	Mm.290578	Alas1	NM_020559.1	NA	aminolevulinic acid synthase 1
H3152G06	1.0797	16.4475	0.000489127	0.0292823	Mm.235289	Dscr1l2	NM_022980.2	NA	Down syndrome critical region gene 1-like 2
H3135D02	0.8973	16.4412	0.000489682	0.0292823	Mm.486	Lamp2	NM_010685.2	NA	lysosomal membrane glycoprotein 2
H3006B01	1.51923	16.4353	0.000490205	0.0292823	Mm.29658	Cklfsf3	NM_024217.2	NA	chemokine-like factor super family 3
H3049C12	0.618475	16.4174	0.000491795	0.0292823	Mm.32646	1110060O18Rik	NM_026846.1	NA	RIKEN cDNA 1110060O18 gene
T252	0.5166	16.3712	0.000495934	0.0292823	Mm.278554	Ucp2	NM_011671.2	NA	uncoupling protein 2, mitochondrial
H3016F09	0.755975	16.354	0.000497491	0.0292823	Mm.286399	0610009M14Rik	NM_023910.4	NA	RIKEN cDNA 0610009M14 gene
N803	1.58072	16.2768	0.000504538	0.0293648	Mm.3092	Inhbb	NA	BC024067.1	inhibin beta-B
H3132A07	1.40833	16.2551	0.000506547	0.029378	NA	NA	NA	NA	EST
H3128G08	0.631575	16.2295	0.000508917	0.0294119	Mm.28327	2510049I19Rik	NM_026455.2	NA	RIKEN cDNA 2510049I19 gene
H3056D05	3.10135	16.1385	0.000517497	0.0295962	NA	NA	NA	NA	EST
H3149B11	1.2051	16.0742	0.000523679	0.0297018	Mm.2814	Mpp1	NM_008621.2	NA	membrane protein, palmitoylated
H3047G04	0.462925	16.0631	0.000524755	0.0297018	Mm.330720	Serf2	NA	AK012395.1	small EDRK-rich factor 2
H3101C07	0.3312	16.0178	0.000529178	0.0298496	NA	NA	NA	NA	EST
H3020C02	1.9538	15.9371	0.00053718	0.0299929	Mm.192991	Mt1	NM_013602.2	NA	metallothionein 1
H3100C01	0.8731	15.9062	0.000540294	0.0300648	Mm.12925	Pde6d	NM_008801.2	NA	phosphodiesterase 6D, cGMP-specific, rod, delta
H3103C06	1.31815	15.8868	0.000542256	0.0300713	Mm.272475	D9Wsu18e	NM_138584.1	NA	DNA segment, Chr 9, Wayne State University 18, expressed
P010	2.84183	15.8078	0.000550346	0.0301658	Mm.877	Cxcl10	NM_021274.1	NA	chemokine (C-X-C motif) ligand 10
H3108E03	1.45762	15.7989	0.000551266	0.0301658	Mm.172346	Tgfbr2	NM_009371.2	NA	transforming growth factor, beta receptor II
T361	1.30798	15.7571	0.000555626	0.0302905	NA	NA	NA	NA	EST
H3015D02	0.79185	15.7419	0.000557222	0.0302905	Mm.25161	Sirt2	NM_022432.2	NA	sirtuin 2 (silent mating type information regulation 2, homolog) 2 (S. cerevisiae)
H3143G10	0.486075	15.6516	0.000566828	0.0303229	Mm.255075	Stk38	NM_134115.1	NA	serine/threonine kinase 38
H3009B06	1.51185	15.6108	0.000571238	0.0303229	Mm.153997	Hs1bp3	NM_021429.1	NA	HS1 binding protein 3
H3079E06	0.518325	15.5824	0.000574333	0.0303229	Mm.273695	Irf6	NM_178083.2	NA	interferon regulatory factor 6
H3003C08	0.726675	15.5791	0.000574698	0.0303229	NA	NA	NA	NA	EST
T336	3.747	15.5596	0.000576834	0.0303229	Mm.251322	Eno3	NM_007933.2	NA	enolase 3, beta muscle
H3124F07	0.63035	15.5484	0.00057807	0.0303229	Mm.275304	Rab22	NM_024436.1	NA	RAB22, member RAS oncogene family
H3024H11	1.662	15.5163	0.00058163	0.0303577	NA	NA	NA	NA	EST
H3129G09	1.72572	15.502	0.000583226	0.0303577	Mm.113770	Uchl1	NM_011670.1	NA	ubiquitin carboxy-terminal hydrolase L1
H3110D10	1.31345	15.3861	0.000596375	0.0304582	NA	NA	NA	NA	EST
H3035F10	1.12878	15.3784	0.000597259	0.0304582	Mm.275766	1110001F24Rik	NM_019821.2	NA	RIKEN cDNA 1110001F24 gene
H3123H12	2.7161	15.2581	0.000611354	0.0304582	Mm.58	Itgb7	NM_013566.1	NA	integrin beta 7
H3107E05	0.7755	15.2212	0.000615768	0.0304582	Mm.32392	3930402D05Rik	NA	BC051115.1	RIKEN cDNA 3930402D05 gene
H3035G07	1.4454	15.2088	0.000617255	0.0304582	Mm.22929	Yars	NM_134151.2	NA	tyrosyl-tRNA synthetase
H3018A12	1.22673	15.2003	0.000618283	0.0304582	Mm.259054	Acox1	NM_015729.1	NA	acyl-Coenzyme A oxidase 1, palmitoyl
H3037D05	1.36078	15.1947	0.000618957	0.0304582	NA	NA	NA	NA	EST
H3020G04	0.846225	15.1914	0.000619357	0.0304582	Mm.726	Bsg	NM_009768.1	NA	basigin
H3102E10	0.961225	15.1596	0.000623224	0.0304582	Mm.153997	Hs1bp3	NM_021429.1	NA	HS1 binding protein 3
H3108E02	1.09048	15.1372	0.000625973	0.0304582	Mm.18856	Mapk6	NM_015806.2	NA	mitogen-activated protein kinase 6
H3140C11	2.724	15.1261	0.000627334	0.0304582	Mm.207052	Atp6v0b	NM_033617.1	NA	ATPase, H+ transporting, V0 subunit B
H3097G01	0.781725	15.0992	0.000630652	0.0304582	Mm.628	Tcfl4	NM_011550.2	NA	transcription factor-like 4
H3157E07	1.1727	15.0956	0.000631108	0.0304582	Mm.218940	Mms19l	NM_028152.2	NA	MMS19 (MET18 S. cerevisiae)-like
H3132A04	1.3407	15.0718	0.000634073	0.0304582	Mm.291908	Ttc11	NM_025562.1	NA	tetratricopeptide repeat domain 11
H3151H12	2.554	15.0556	0.00063609	0.0304582	Mm.41665	1110025J15Rik	NM_023168.1	NA	RIKEN cDNA 1110025J15 gene
H3097F04	3.80172	15.0319	0.00063908	0.0304582	Mm.27227	5730469M10Rik	NM_027464.1	NA	RIKEN cDNA 5730469M10 gene
P057	1.9102	15.023	0.000640206	0.0304582	Mm.261676	Hist1h2bc	NM_023422.1	NA	histone 1, H2bc
H3016F01	0.47235	15.0087	0.000642012	0.0304582	Mm.272206	Mapkapk5	NM_010765.1	NA	MAP kinase-activated protein kinase 5
H3107G10	1.2719	14.9958	0.000643649	0.0304582	Mm.6142	Naglu	NM_013792.1	NA	alpha-N-acetylglucosaminidase (Sanfilippo disease IIIB)
H3108A04	2.54635	14.9747	0.000646353	0.0304582	Mm.200608	Clu	NM_013492.1	NA	clusterin
H3015G09	1.85817	14.9486	0.0006497	0.0304802	Mm.21976	0610031J06Rik	NM_020003.1	NA	RIKEN cDNA 0610031J06 gene
T076	0.757125	14.837	0.000664322	0.0305148	Mm.236443	Fasn	NM_007988.1	NA	fatty acid synthase
H3101E04	0.833775	14.8061	0.000668444	0.0305148	Mm.289082	Wdr26	NM_145514.2	NA	WD repeat domain 26
H3029F09	1.53188	14.7816	0.000671735	0.0305148	Mm.29045	Atp6v1e1	NM_007510.1	NA	ATPase, H+ transporting, V1 subunit E isoform 1
N859	1.11643	14.7804	0.000671891	0.0305148	NA	NA	NA	NA	EST
P897	1.6062	14.7725	0.000672961	0.0305148	Mm.250419	Ccni	NM_017367.2	NA	cyclin I
H3118F07	2.22618	14.7408	0.000677262	0.0305148	Mm.43278	Olfm1	NM_019498.1	NA	olfactomedin 1
H3013C04	2.08323	14.6494	0.000689879	0.0306498	Mm.40828	Sqstm1	NM_011018.1	NA	sequestosome 1
P146	2.08683	14.622	0.000693719	0.0306498	Mm.31915	Cav2	NM_016900.2	NA	caveolin 2
H3030E02	0.585325	14.5944	0.000697619	0.0306736	Mm.291793	Gabarapl2	NM_026693.2	NA	GABA(A) receptor-associated protein like 2
H3104F07	0.79425	14.5328	0.000706426	0.0307007	Mm.27707	B430214A04Rik	NM_146018.1	NA	RIKEN cDNA B430214A04 gene
T300	0.84615	14.4662	0.000716122	0.0310401	Mm.287987	Ubl5	NM_025401.1	NA	ubiquitin-like 5
H3079F01	1.39738	14.4041	0.000725315	0.031274	Mm.61526	Hmgcs1	NM_145942.2	NA	3-hydroxy-3-methylglutaryl-Coenzyme A synthase 1
H3021B02	4.66598	14.3579	0.000732261	0.0312818	Mm.22479	Krt1-18	NM_010664.1	NA	keratin complex 1, acidic, gene 18
H3106C03	1.54855	14.3549	0.000732707	0.0312818	NA	NA	NA	NA	EST
H3132G09	0.947	14.3524	0.000733094	0.0312818	Mm.27082	Atp6v1h	NM_133826.2	NA	ATPase, H+ transporting, lysosomal 50/57kDa, V1 subunit H
H3138C04	0.63015	14.2705	0.000745639	0.0317349	Mm.217764	Pgm2	NM_028132.2	NA	phosphoglucomutase 2
H3073H11	1.93758	14.2573	0.000747686	0.0317401	Mm.3204	Fdft1	NM_010191.2	NA	farnesyl diphosphate farnesyl transferase 1
T337	1.5307	14.1953	0.000757405	0.0319555	Mm.275831	Aldo1	NM_007438.2	NA	aldolase 1, A isoform
H3133D02	0.39105	14.1849	0.000759065	0.0319555	Mm.309325	NA	NA	CF892011.1	Mus musculus transcribed sequences
H3049B11	0.581925	14.1553	0.000763777	0.0319555	Mm.28326	D8Ertd354e	NM_133970.1	NA	DNA segment, Chr 8, ERATO Doi 354, expressed
H3067A05	2.01785	14.1393	0.000766338	0.0319555	Mm.208955	BC031353	NM_153584.1	NA	cDNA sequence BC031353
H3022B01	4.72065	14.0768	0.000776474	0.0322962	NA	NA	NA	NA	EST
H3028A04	0.60995	14.0294	0.000784268	0.0324565	Mm.300126	NA	NA	BY002023.1	Mus musculus transcribed sequence with strong similarity to protein pdb:2RMA (H.sapiens) S Chain S, Cyclophilin A (E.C.5.2.1.8) Complexed With Cyclosporin A
H3039F09	0.855625	13.9643	0.00079516	0.032661	Mm.172699	NA	NA	BY734523.1	Mus musculus transcribed sequences
H3072B10	1.9449	13.938	0.000799619	0.0327324	Mm.18503	Ninj1	NM_013610.1	NA	ninjurin 1
H3115F07	1.50703	13.9178	0.000803056	0.0327337	Mm.45106	Pigc	NM_026078.1	NA	phosphatidylinositol glycan, classC
H3144B12	0.7958	13.9072	0.000804879	0.0327337	Mm.276007	Ern1	NM_023913.2	NA	endoplasmic reticulum (ER) to nucleus signalling 1
H3016H06	0.98455	13.8722	0.000810902	0.0328166	Mm.284984	Ywhag	NM_018871.2	NA	3-monooxgenase/tryptophan 5-monooxgenase activation protein, gamma polypeptide
H3047C01	0.916475	13.854	0.00081407	0.0328641	Mm.5949	1600027N09Rik	NA	BC054431.1	RIKEN cDNA 1600027N09 gene
H3135G07	1.1685	13.8353	0.000817334	0.0329152	Mm.328881	NA	NA	BY005164.1	Mus musculus transcribed sequence with strong similarity to protein pir:A56449 (H.sapiens) A56449 protoporphyrinogen oxidase (EC 1.3.3.4) - human
H3079E04	1.49293	13.823	0.00081949	0.0329215	Mm.218350	2610511F20Rik	NA	AK090293.1	RIKEN cDNA 2610511F20 gene
H3008B10	1.41845	13.716	0.000838563	0.0330751	Mm.271689	Tcirg1	NM_016921.2	NA	T-cell, immune regulator 1
H3104C04	1.72465	13.7128	0.000839147	0.0330751	NA	NA	NA	NA	EST
H3028B04	1.01162	13.7115	0.000839382	0.0330751	Mm.136973	1700022N24Rik	NM_145355.2	NA	RIKEN cDNA 1700022N24 gene
H3131A07	1.12125	13.6694	0.000847073	0.0330751	Mm.291776	NA	NA	BY080091.1	Mus musculus transcribed sequence with moderate similarity to protein pir:I38882 (H.sapiens) I38882 peroxisomal enoyl-CoA hydratase-like protein - human
H3059A11	2.42077	13.6655	0.000847788	0.0330751	Mm.66222	Cxadr	NM_009988.1	NA	coxsackievirus and adenovirus receptor
H3146C10	0.73405	13.6508	0.000850488	0.0330751	Mm.1685	Plxna3	NM_008883.1	NA	plexin A3
P429	1.2459	13.5717	0.000865259	0.0330751	Mm.5027	Ezh1	NM_007970.1	NA	enhancer of zeste homolog 1 (Drosophila)
H3014C04	0.61145	13.5289	0.000873383	0.0330751	Mm.3213	Ldlr	NM_010700.1	NA	low density lipoprotein receptor
H3058H07	1.13918	13.525	0.000874126	0.0330751	Mm.27900	1810013D10Rik	NA	AK007474.1	RIKEN cDNA 1810013D10 gene
H3017A02	0.9731	13.5197	0.00087514	0.0330751	Mm.116749	Oaz2	NM_010952.2	NA	ornithine decarboxylase antizyme 2
H3132E07	1.72245	13.4847	0.000881888	0.0331634	Mm.2632	Lxn	NM_016753.2	NA	latexin
H3135E04	0.5103	13.4396	0.000890687	0.0332502	Mm.260737	Spag9	NM_027569.1	NA	sperm associated antigen 9
H3114A02	0.301075	13.4315	0.00089227	0.0332502	Mm.130172	E130309F12Rik	NM_178756.2	NA	RIKEN cDNA E130309F12 gene
H3010C11	1.00085	13.4074	0.00089703	0.0333521	Mm.6095	Cstb	NM_007793.2	NA	cystatin B
H3048E06	0.729525	13.3494	0.000908607	0.0335193	Mm.276536	Timm8b	NM_013897.1	NA	translocase of inner mitochondrial membrane 8 homolog b (yeast)
H3115A08	2.52228	13.3042	0.000917791	0.0335288	Mm.263124	Ly6a	NM_010738.2	NA	lymphocyte antigen 6 complex, locus A
H3070E01	0.4383	13.3023	0.000918177	0.0335288	Mm.15928	Preb	NM_016703.1	NA	prolactin regulatory element binding
H3009A09	0.823375	13.2929	0.0009201	0.0335288	Mm.272675	Slc20a1	NM_015747.1	NA	solute carrier family 20, member 1
H3141C07	1.16807	13.2366	0.000931729	0.0335288	Mm.18561	Cyhr1	NM_180962.1	NA	cysteine and histidine rich 1
H3110D09	0.8535	13.2338	0.000932316	0.0335288	Mm.19091	D19Wsu55e	NM_181403.2	NA	DNA segment, Chr 19, Wayne State University 55, expressed
H3027A11	1.25178	13.2142	0.000936419	0.0335803	Mm.30155	Atp6v0c	NM_009729.1	NA	ATPase, H+ transporting, V0 subunit C
H3110A08	1.99972	13.2075	0.000937825	0.0335803	Mm.18603	Hdc	NM_008230.4	NA	histidine decarboxylase
H3027G09	0.59875	13.1443	0.000951228	0.0337665	Mm.4419	Rpl5	NM_016980.1	NA	ribosomal protein L5
H3062E08	0.41665	13.1041	0.000959893	0.0338473	NA	NA	NA	NA	EST
H3003D12	0.1891	13.0956	0.000961722	0.0338473	Mm.3705	P4ha2	NM_011031.1	NA	procollagen-proline, 2-oxoglutarate 4-dioxygenase (proline 4-hydroxylase), alpha II polypeptide
H3122C05	1.97475	13.0497	0.000971774	0.0340371	Mm.28771	1110035H23Rik	NM_134076.1	NA	RIKEN cDNA 1110035H23 gene
P218	1.50525	13.0401	0.000973888	0.0340371	Mm.267078	Hgf	NA	AK033274.1	hepatocyte growth factor
H3158D02	0.920025	13.0006	0.000982668	0.0340371	Mm.29150	Tcte1l	NM_025975.3	NA	t-complex-associated-testis-expressed 1-like
H3089D05	1.67427	12.9892	0.000985213	0.0340371	Mm.288898	Mllt3	NM_029931.1	NA	myeloid/lymphoid or mixed lineage-leukemia translocation to 3 homolog (Drosophila)
H3009D01	0.409075	12.9851	0.000986145	0.0340371	Mm.209750	1110054H05Rik	NA	AK078027.1	RIKEN cDNA 1110054H05 gene
H3106F06	0.70155	12.9035	0.00100471	0.0341913	Mm.271898	Ulk1	NM_009469.3	NA	Unc-51 like kinase 1 (C. elegans)
P234	1.01877	12.8332	0.00102107	0.0344956	Mm.250605	Sel1h	NA	AK008076.1	Sel1 (suppressor of lin-12) 1 homolog (C. elegans)
H3057B09	1.23515	12.8018	0.00102848	0.0345659	Mm.297833	Ube2h	NM_009459.1	NA	ubiquitin-conjugating enzyme E2H
H3053H08	1.04042	12.7798	0.00103372	0.0345659	Mm.316823	NA	NA	C86195.1	Mus musculus transcribed sequences
H3010G07	1.88898	12.7776	0.00103425	0.0345659	Mm.42040	Ak4	NM_009647.1	NA	adenylate kinase 4
H3158B03	0.794375	12.7762	0.0010346	0.0345659	Mm.1410	Il18	NM_008360.1	NA	interleukin 18
H3097H12	2.59265	12.7219	0.0010477	0.0348621	Mm.4141	Vldlr	NM_013703.1	NA	very low density lipoprotein receptor
H3050G10	0.81365	12.6905	0.00105539	0.035047	Mm.9860	4833420G17Rik	NM_026127.3	NA	RIKEN cDNA 4833420G17 gene
H3092H11	1.95863	12.6226	0.00107226	0.0354009	NA	NA	NA	NA	EST
H3038B04	0.489525	12.6116	0.00107502	0.0354134	Mm.272468	1300019H17Rik	NM_024183.3	NA	RIKEN cDNA 1300019H17 gene
H3029C03	2.89547	12.5798	0.00108307	0.0355185	Mm.89918	Podxl	NM_013723.2	NA	podocalyxin-like
H3110G08	0.74215	12.5555	0.00108927	0.0355276	Mm.24350	H1f0	NM_008197.2	NA	H1 histone family, member 0
H3010F03	1.44592	12.5257	0.00109696	0.0356591	Mm.44226	3010027G13Rik	NM_026542.1	NA	RIKEN cDNA 3010027G13 gene
H3069G07	0.4664	12.521	0.00109816	0.0356591	Mm.27404	1110002A21Rik	NM_026123.2	NA	RIKEN cDNA 1110002A21 gene
H3112C06	1.8441	12.4797	0.00110895	0.0356591	NA	NA	NA	NA	EST
P660	1.07377	12.4592	0.00111434	0.0356591	Mm.1776	Fth	NM_010239.1	NA	ferritin heavy chain
H3021B10	0.75625	12.4481	0.00111728	0.0356591	Mm.25339	Mta2	NM_011842.2	NA	metastais-associated gene family, member 2
H3051D03	0.8723	12.4424	0.0011188	0.0356591	Mm.246398	Tiparp	NM_178892.3	NA	TCDD-inducible poly(ADP-ribose) polymerase
H3013D10	0.581775	12.437	0.00112023	0.0356591	NA	NA	NA	NA	EST
H3027E10	0.549375	12.432	0.00112155	0.0356591	Mm.27389	Vps41	NM_172120.2	NA	vacuolar protein sorting 41 (yeast)
H3028G09	1.6454	12.4243	0.00112362	0.0356591	Mm.290207	Ets2	NM_011809.2	NA	E26 avian leukemia oncogene 2, 3' domain
H3011G11	1.15922	12.3939	0.00113178	0.0356846	Mm.154387	Tkt	NM_009388.2	NA	transketolase
H3057G09	2.38327	12.3891	0.00113309	0.0356846	Mm.27789	6030440G05Rik	NM_145148.1	NA	RIKEN cDNA 6030440G05 gene
H3113G05	1.10492	12.3758	0.00113666	0.035729	Mm.277533	2310076K21Rik	NA	BY010387.1	RIKEN cDNA 2310076K21 gene
H3007D09	0.14515	12.3271	0.00114999	0.0359164	Mm.266635	Pmscl2	NM_016699.1	NA	polymyositis/scleroderma autoantigen 2
H3015E03	1.06085	12.326	0.00115029	0.0359164	Mm.299003	Pbp	NM_018858.1	NA	phosphatidylethanolamine binding protein
H3031C12	1.93223	12.3176	0.0011526	0.0359164	Mm.30837	Ndr1	NM_008681.1	NA	N-myc downstream regulated 1
H3129B04	0.997875	12.2967	0.00115841	0.0359164	Mm.292530	Dazap2	NM_011873.2	NA	DAZ associated protein 2
P702	4.2207	12.2908	0.00116005	0.0359164	Mm.22479	Krt1-18	NM_010664.1	NA	keratin complex 1, acidic, gene 18
H3116A06	0.9769	12.2894	0.00116044	0.0359164	Mm.27769	Pnrc1	NA	AK089142.1	proline-rich nuclear receptor coactivator 1
H3125B11	1.1645	12.2751	0.00116443	0.0359164	NA	NA	NA	NA	EST
H3098F10	0.3471	12.2526	0.00117077	0.0359498	Mm.295181	Sca2	NM_009125.1	NA	spinocerebellar ataxia 2 homolog (human)
P329	1.76252	12.2517	0.00117101	0.0359498	Mm.1440	Tac1	NM_009311.1	NA	tachykinin 1
H3012F09	1.00608	12.2417	0.00117386	0.0359498	Mm.7524	Dag1	NM_010017.1	NA	dystroglycan 1
H3116A07	1.25822	12.2153	0.00118136	0.0359498	Mm.292075	Spg7	NM_153176.3	NA	spastic paraplegia 7 homolog (human)
H3146A02	0.582475	12.1867	0.00118956	0.0359498	Mm.286353	Tbc1d1	NM_019636.1	NA	TBC1 domain family, member 1
H3076C08	0.784775	12.1833	0.00119054	0.0359498	Mm.32009	5830406J20Rik	NM_175204.2	NA	RIKEN cDNA 5830406J20 gene
H3095A06	1.07955	12.1637	0.0011962	0.0359498	Mm.22147	Gtpbp2	NM_019581.2	NA	GTP binding protein 2
H3113B09	0.5216	12.147	0.00120107	0.0359498	Mm.273594	8430432M10Rik	NM_176831.2	NA	RIKEN cDNA 8430432M10 gene
H3131G02	0.560125	12.1427	0.00120233	0.0359498	Mm.42163	Casp12	NM_009808.2	NA	caspase 12
H3137B03	1.27018	12.0984	0.00121537	0.0359498	Mm.23551	BC016265	NM_144839.1	NA	cDNA sequence BC016265
H3007G06	4.5773	12.0984	0.00121537	0.0359498	Mm.22479	Krt1-18	NM_010664.1	NA	keratin complex 1, acidic, gene 18
H3022D11	0.24735	12.0956	0.00121618	0.0359498	Mm.48686	Ppp4r1	NM_146081.1	NA	protein phosphatase 4, regulatory subunit 1
H3116F03	2.1302	12.091	0.00121755	0.0359498	Mm.275414	A930001N09Rik	NM_029870.1	NA	RIKEN cDNA A930001N09 gene
H3026E02	1.22208	12.087	0.00121876	0.0359498	Mm.279599	1200014P03Rik	NM_029091.1	NA	RIKEN cDNA 1200014P03 gene
T351	0.376425	12.0834	0.00121983	0.0359498	Mm.257154	Mapk8ip2	NM_009948.1	NA	mitogen-activated protein kinase 8 interacting protein 2
H3007D02	0.611675	12.0748	0.0012224	0.0359538	Mm.2344	Gnb1	NM_008142.2	NA	guanine nucleotide binding protein, beta 1
P317	0.741675	12.0558	0.00122808	0.0360459	Mm.234608	Slc11a2	NM_008732.1	NA	solute carrier family 11 (proton-coupled divalent metal ion transporters), member 2
H3023F09	2.64995	12.0449	0.00123137	0.0360459	Mm.296119	Gnpda1	NM_011937.1	NA	glucosamine-6-phosphate deaminase 1
H3106G09	0.691175	12.0425	0.0012321	0.0360459	Mm.1182	2610208E05Rik	NM_175364.2	NA	RIKEN cDNA 2610208E05 gene
H3073H02	0.639725	12.0266	0.00123691	0.0360915	Mm.258142	A930017E24Rik	NM_177041.2	NA	RIKEN cDNA A930017E24 gene
H3155E04	0.4836	12.0113	0.00124157	0.0360915	Mm.29842	Ndufv1	NM_133666.1	NA	NADH dehydrogenase (ubiquinone) flavoprotein 1
H3144B11	0.674325	12.0077	0.00124265	0.0360915	Mm.273454	NA	NA	BY369938.1	Mus musculus transcribed sequence with weak similarity to protein ref:NP_056057.1 (H.sapiens) centaurin delta 2, isoform b; ARF-GAP, RHO-GAP, ankyrin repeat, and pleckstrin homology domains-containing protein 1 [Homo sapiens]
H3109D03	1.4155	12.0031	0.00124406	0.0360915	Mm.486	Lamp2	NM_010685.2	NA	lysosomal membrane glycoprotein 2
H3023D07	1.26432	11.9942	0.0012468	0.0360915	Mm.132172	D630041K24Rik	NA	AK047973.1	RIKEN cDNA D630041K24 gene
H3082F01	0.342725	11.9741	0.00125299	0.0360967	Mm.290502	2610208M17Rik	NM_145626.1	NA	RIKEN cDNA 2610208M17 gene
H3027A10	1.27835	11.9577	0.00125807	0.0360967	Mm.30155	Atp6v0c	NM_009729.1	NA	ATPase, H+ transporting, V0 subunit C
H3080C05	1.5726	11.9337	0.00126553	0.0360967	Mm.15969	Adam8	NM_007403.1	NA	a disintegrin and metalloprotease domain 8
H3082B10	1.68265	11.9334	0.00126562	0.0360967	Mm.28357	Map1lc3	NM_026160.1	NA	microtubule-associated protein 1 light chain 3
H3122G10	1.68735	11.9307	0.00126647	0.0360967	Mm.21299	AW549877	NM_145930.1	NA	expressed sequence AW549877
H3102E06	1.02785	11.9067	0.00127402	0.0361675	Mm.12915	Nit1	NM_012049.1	NA	nitrilase 1
H3024G04	4.06425	11.8964	0.00127726	0.0361675	NA	NA	NA	NA	EST
H3031A06	1.619	11.8754	0.00128394	0.0361675	Mm.101368	Acp6	NM_019800.1	NA	acid phosphatase 6, lysophosphatidic
H3112G09	1.41023	11.835	0.00129692	0.0362775	Mm.17708	Atp6v0d1	NM_013477.2	NA	ATPase, H+ transporting, V0 subunit D isoform 1
H3014B09	1.27665	11.8028	0.00130738	0.0362775	Mm.294083	Anxa11	NM_013469.1	NA	annexin A11
H3076A01	0.4131	11.7949	0.00130998	0.0362775	Mm.121973	5031439G07Rik	NA	AK030332.1	RIKEN cDNA 5031439G07 gene
P551	2.7157	11.7907	0.00131135	0.0362775	Mm.1236	Gadd45a	NM_007836.1	NA	growth arrest and DNA-damage-inducible 45 alpha
H3110G03	1.7108	11.7598	0.00132154	0.0362941	Mm.18539	Pink1	NM_026880.1	NA	PTEN induced putative kinase 1
H3024D09	0.924	11.7526	0.00132393	0.0362941	Mm.2654	Wdr1	NM_011715.1	NA	WD repeat domain 1
H3113A07	0.297075	11.7458	0.0013262	0.0362941	Mm.166937	NA	NA	AK047313.1	Mus musculus 10 days neonate cerebellum cDNA, RIKEN full-length enriched library, clone:B930048L16 product:unknown EST, full insert sequence
H3092B05	0.413525	11.7448	0.00132652	0.0362941	Mm.38506	Cnnm2	NM_033569.1	NA	cyclin M2
H3135B11	1.24683	11.7304	0.00133134	0.0363657	Mm.21071	Arl2	NM_019722.3	NA	ADP-ribosylation factor-like 2
H3012A12	0.58865	11.7217	0.00133423	0.0363843	Mm.127744	NA	NA	AK048868.1	Mus musculus 0 day neonate cerebellum cDNA, RIKEN full-length enriched library, clone:C230077J22 product:unknown EST, full insert sequence
H3025G10	1.4821	11.7149	0.00133654	0.036387	Mm.41773	Tmem9	NM_025439.2	NA	transmembrane protein 9
H3107C05	0.745925	11.7063	0.00133942	0.0364053	Mm.122494	BC054822	NA	BC054822.1	cDNA sequence BC054822
H3144F06	2.42115	11.681	0.00134802	0.0364502	Mm.381	Adfp	NM_007408.2	NA	adipose differentiation related protein
H3096G02	1.98893	11.6666	0.00135289	0.0364502	Mm.70065	NA	NA	AK088561.1	Mus musculus 2 days neonate thymus thymic cells cDNA, RIKEN full-length enriched library, clone:E430020E24 product:unknown EST, full insert sequence
H3122F04	0.661675	11.6605	0.00135499	0.0364502	Mm.229109	Abcd4	NM_008992.1	NA	ATP-binding cassette, sub-family D (ALD), member 4
H3101D11	1.1695	11.592	0.00137872	0.0367458	Mm.28193	1810031K17Rik	NM_026977.1	NA	RIKEN cDNA 1810031K17 gene
H3073E08	0.869	11.5518	0.00139291	0.0369559	Mm.246398	Tiparp	NM_178892.3	NA	TCDD-inducible poly(ADP-ribose) polymerase
H3107E04	1.82965	11.5506	0.00139334	0.0369559	Mm.1405	Wbp2	NM_016852.1	NA	WW domain binding protein 2
H3079G08	0.543325	11.525	0.00140248	0.0371386	Mm.2815	1110021H02Rik	NM_025388.1	NA	RIKEN cDNA 1110021H02 gene
H3050H03	1.5426	11.5036	0.00141019	0.037283	Mm.28771	1110035H23Rik	NM_134076.1	NA	RIKEN cDNA 1110035H23 gene
H3025E10	0.5294	11.4433	0.00143221	0.0375285	Mm.279907	Rdbp	NM_138580.1	NA	RD RNA-binding protein
H3057F02	1.11773	11.4418	0.00143277	0.0375285	Mm.219813	B230339H12Rik	NM_172282.1	NA	RIKEN cDNA B230339H12 gene
H3091H01	1.401	11.4406	0.00143319	0.0375285	Mm.202092	1200004M23Rik	NM_026169.3	NA	RIKEN cDNA 1200004M23 gene
H3089F12	1.35258	11.4121	0.00144377	0.0375635	Mm.240627	Sox4	NM_009238.1	NA	SRY-box containing gene 4
H3156E02	1.3686	11.4118	0.00144389	0.0375635	Mm.277533	2310076K21Rik	NA	BY010387.1	RIKEN cDNA 2310076K21 gene
H3113G07	2.11825	11.3616	0.00146277	0.0377637	Mm.269192	Plcg2	NM_172285.1	NA	phospholipase C, gamma 2
H3024F02	2.18777	11.3541	0.0014656	0.0377776	Mm.20948	Tcn2	NM_015749.1	NA	transcobalamin 2
H3015E09	1.44325	11.3116	0.00148186	0.0380432	Mm.29355	Rab13	NM_026677.1	NA	RAB13, member RAS oncogene family
H3049D12	0.780075	11.2944	0.00148852	0.0380432	Mm.209292	Rbpsuh	NM_009035.1	NA	recombining binding protein suppressor of hairless (Drosophila)
H3114A06	2.09875	11.2887	0.00149075	0.0380432	Mm.2734	Sat1	NM_009121.2	NA	spermidine/spermine N1-acetyl transferase 1
H3037D10	0.633175	11.2863	0.00149169	0.0380432	Mm.294885	Creg	NA	BY001258.1	cellular repressor of E1A-stimulated genes
H3011D07	1.00845	11.2649	0.00150005	0.0380432	Mm.28688	Sars1	NM_011319.1	NA	seryl-aminoacyl-tRNA synthetase 1
H3078G12	1.77058	11.2402	0.00150976	0.0380432	Mm.273251	Sdh1	NM_146126.1	NA	sorbitol dehydrogenase 1
H3100A01	1.12613	11.2371	0.00151098	0.0380432	Mm.292405	Zfp216	NM_009551.2	NA	zinc finger protein 216
H3018B05	0.59065	11.2356	0.0015116	0.0380432	Mm.287500	2310016K04Rik	NA	AK077451.1	RIKEN cDNA 2310016K04 gene
H3114A05	0.770875	11.23	0.00151383	0.0380432	Mm.297465	NA	NA	XM_354586.1	Mus musculus similar to Phospholipid hydroperoxide glutathione peroxidase, mitochondrial precursor (PHGPx) (GPX-4) (LOC380677), mRNA
P408	1.61125	11.2103	0.00152167	0.0380439	Mm.154660	Plat	NM_008872.1	NA	plasminogen activator, tissue
H3111G01	0.978575	11.2072	0.00152291	0.0380439	Mm.220890	1110031I02Rik	NM_025402.1	NA	RIKEN cDNA 1110031I02 gene
H3048F06	0.98295	11.1619	0.00154117	0.0382505	Mm.267956	NA	NA	AK021381.1	Mus musculus 0 day neonate eyeball cDNA, RIKEN full-length enriched library, clone:E130112C09 product:unclassifiable, full insert sequence
H3112E03	1.58615	11.1526	0.00154494	0.0382505	NA	NA	NA	NA	EST
H3009E04	0.798875	11.1284	0.00155485	0.0382505	Mm.286536	2410043F08Rik	NM_133754.1	NA	RIKEN cDNA 2410043F08 gene
H3082D09	1.16562	11.1258	0.00155594	0.0382505	Mm.13849	Hspb1	NM_013560.1	NA	heat shock protein 1
H3024A09	1.75743	11.0797	0.00157507	0.038481	NA	NA	NA	NA	EST
H3112C04	2.096	11.0361	0.00159344	0.038516	NA	NA	NA	NA	EST
H3102A12	0.897175	11.033	0.00159473	0.038516	Mm.292712	Kctd6	NM_027782.1	NA	potassium channel tetramerisation domain containing 6
P857	2.87995	11.0251	0.00159814	0.038516	Mm.58	Itgb7	NM_013566.1	NA	integrin beta 7
H3019G11	0.83755	11.0191	0.00160067	0.038516	Mm.28465	Lrp10	NM_022993.2	NA	low-density lipoprotein receptor-related protein 10
H3011C11	1.9524	11.0151	0.0016024	0.038516	Mm.280536	Manba	NM_027288.2	NA	mannosidase, beta A, lysosomal
H3112H08	0.1946	11.0059	0.00160632	0.038516	NA	NA	NA	NA	EST
H3024C07	1.40245	10.9794	0.00161777	0.038516	Mm.2284	Hexa	NM_010421.1	NA	hexosaminidase A
H3104F08	1.09767	10.9771	0.00161874	0.038516	Mm.27155	Dgcr6	NM_010047.1	NA	DiGeorge syndrome critical region gene 6
H3054B07	0.92685	10.9751	0.00161962	0.038516	Mm.177724	2810484M10Rik	NM_133684.2	NA	RIKEN cDNA 2810484M10 gene
H3157E05	0.869625	10.9731	0.00162051	0.038516	Mm.27801	Slc30a4	NM_011774.1	NA	solute carrier family 30 (zinc transporter), member 4
H3096A05	1.79482	10.9677	0.00162286	0.038516	Mm.222867	Dap	NM_146057.1	NA	death-associated protein
H3139D09	1.85258	10.9456	0.00163249	0.0385706	NA	NA	NA	NA	EST
P467	0.891175	10.9272	0.00164059	0.0386164	Mm.89136	H3f3a	NM_008210.2	NA	H3 histone, family 3A
H3016F10	0.756175	10.917	0.00164511	0.0386221	Mm.28297	Cdk5rap3	NM_030248.1	NA	CDK5 regulatory subunit associated protein 3
P835	0.66715	10.9095	0.00164843	0.0386221	Mm.39094	Nog	NM_008711.1	NA	noggin
H3024F09	1.14193	10.8792	0.00166198	0.0386745	Mm.2941	Mttp	NM_008642.1	NA	microsomal triglyceride transfer protein
H3013B02	1.14542	10.8529	0.00167384	0.0386745	Mm.249096	Atp6v1b2	NM_007509.2	NA	ATPase, H+ transporting, V1 subunit B, isoform 2
H3135F03	1.13725	10.8449	0.00167749	0.0386745	Mm.322132	NA	NA	CK337390.1	Mus musculus transcribed sequences
H3007C01	1.17597	10.8157	0.00169083	0.0386745	Mm.41890	2010315L10Rik	NM_029768.2	NA	RIKEN cDNA 2010315L10 gene
H3040B02	1.01648	10.8064	0.00169513	0.0386745	Mm.205045	Ddx41	NM_134059.1	NA	DEAD (Asp-Glu-Ala-Asp) box polypeptide 41
H3126G02	0.73115	10.7856	0.00170473	0.0388362	Mm.289387	1110021N07Rik	NM_024207.2	NA	RIKEN cDNA 1110021N07 gene
H3056D03	0.35905	10.7543	0.00171936	0.0390076	Mm.275555	Cnn3	NM_028044.1	NA	calponin 3, acidic
H3005E10	0.7623	10.7278	0.00173188	0.0390221	Mm.4550	Atp1b1	NM_009721.2	NA	ATPase, Na+/K+ transporting, beta 1 polypeptide
P923	0.712975	10.7017	0.00174431	0.0391957	Mm.117076	Gprk2l	NM_019497.1	NA	G protein-coupled receptor kinase 2, groucho gene related (Drosophila)
H3070A10	0.379825	10.6851	0.0017523	0.0392149	Mm.69739	2810460C24Rik	NM_028360.1	NA	RIKEN cDNA 2810460C24 gene
H3113D12	0.547125	10.6261	0.00178104	0.0393256	Mm.103114	Mlh3	NA	BY671734.1	mutL homolog 3 (E coli)
H3133D06	0.571725	10.6179	0.00178507	0.0393256	Mm.21535	Grpel1	NM_024478.2	NA	GrpE-like 1, mitochondrial
T169	1.38825	10.6051	0.00179141	0.0393256	Mm.12945	Pik3r2	NM_008841.1	NA	phosphatidylinositol 3-kinase, regulatory subunit, polypeptide 2 (p85 beta)
H3017E02	0.806325	10.6011	0.00179341	0.0393256	Mm.289387	1110021N07Rik	NM_024207.2	NA	RIKEN cDNA 1110021N07 gene
H3141D06	1.40195	10.5973	0.00179527	0.0393256	Mm.127550	D330023L08Rik	NM_153391.1	NA	RIKEN cDNA D330023L08 gene
H3144A05	0.857125	10.5905	0.00179866	0.0393256	Mm.292539	Slc31a2	NM_025286.1	NA	solute carrier family 31, member 2
H3158A11	0.288675	10.5834	0.00180225	0.0393256	Mm.31330	Kif16b	NA	AK129401.1	kinesin family member 16B
H3118C01	0.8874	10.579	0.00180445	0.0393256	Mm.133551	Atp5j2	NM_020582.1	NA	ATP synthase, H+ transporting, mitochondrial F0 complex, subunit f, isoform 2
H3029A08	0.337925	10.5764	0.00180573	0.0393256	Mm.31018	Cyb5	NM_025797.1	NA	cytochrome b-5
H3089D06	1.51893	10.5733	0.00180727	0.0393256	Mm.28278	Cav	NM_007616.2	NA	caveolin, caveolae protein
H3127F04	1.57597	10.5731	0.00180739	0.0393256	Mm.41887	Chst11	NM_021439.1	NA	carbohydrate sulfotransferase 11
H3005F11	0.7586	10.5285	0.00182998	0.0396079	Mm.200859	Pafah1b2	NM_008775.2	NA	platelet-activating factor acetylhydrolase, isoform 1b, alpha2 subunit
H3005G11	0.767225	10.506	0.00184149	0.0396473	Mm.239329	Lbcl1	NM_008487.1	NA	lymphoid blast crisis-like 1
H3154C04	0.65275	10.4965	0.00184642	0.0396512	Mm.23879	Sbno1	NA	BC023706.1	sno, strawberry notch homolog 1 (Drosophila)
H3147E08	0.81255	10.4827	0.00185356	0.0397525	Mm.28258	1500016L11Rik	NM_026885.1	NA	RIKEN cDNA 1500016L11 gene
H3081G02	0.719975	10.4494	0.00187095	0.040008	Mm.43212	D7Ertd743e	NM_153525.2	NA	DNA segment, Chr 7, ERATO Doi 743, expressed
H3109H12	1.33098	10.4166	0.00188831	0.040008	Mm.28385	1810009M01Rik	NM_023056.2	NA	RIKEN cDNA 1810009M01 gene
H3035A11	0.779175	10.4159	0.00188868	0.040008	Mm.4948	Foxo3	NM_019740.1	NA	forkhead box O3
H3135H11	1.72247	10.4138	0.00188976	0.040008	Mm.196239	1010001H21Rik	NM_025735.1	NA	RIKEN cDNA 1010001H21 gene
H3110F12	0.954325	10.3502	0.00192409	0.0405783	Mm.294777	1300010O06Rik	NM_025830.3	NA	RIKEN cDNA 1300010O06 gene
H3157H04	0.990475	10.3339	0.00193299	0.0406117	NA	NA	NA	NA	EST
T353	1.79967	10.3337	0.00193307	0.0406117	NA	NA	NA	NA	EST
H3114C10	1.76032	10.3188	0.00194128	0.0407313	Mm.7046	Ppgb	NM_008906.2	NA	protective protein for beta-galactosidase
T478	2.03083	10.3096	0.0019464	0.0407358	Mm.298312	Sstr2	NM_009217.1	NA	somatostatin receptor 2
H3092B11	0.58545	10.2905	0.00195701	0.0407786	Mm.17009	Ralbp1	NM_009067.1	NA	ralA binding protein 1
H3116A01	0.9475	10.2881	0.00195834	0.0407786	Mm.27366	D7Bwg0611e	NM_027898.2	NA	DNA segment, Chr 7, Brigham & Women's Genetics 0611 expressed
H3122C01	0.6265	10.2755	0.00196539	0.0408737	Mm.87639	Hbp1	NM_177993.1	NA	high mobility group box transcription factor 1
H3100H09	0.856525	10.2508	0.0019793	0.0409561	Mm.103706	Mrps6	NM_017391.1	NA	mitochondrial ribosomal protein S6
H3063H06	1.30715	10.2048	0.00200562	0.0411794	Mm.27320	Glcci1	NM_178072.2	NA	glucocorticoid induced transcript 1
H3118E03	0.425225	10.2032	0.00200651	0.0411794	Mm.268400	2810442I22Rik	NA	BC030901.1	RIKEN cDNA 2810442I22 gene
H3104F03	4.4655	10.1961	0.00201062	0.0411794	Mm.22479	Krt1-18	NM_010664.1	NA	keratin complex 1, acidic, gene 18
H3144F12	0.705075	10.1955	0.00201095	0.0411794	Mm.54126	1200006O19Rik	NM_026164.1	NA	RIKEN cDNA 1200006O19 gene
H3050H06	0.8711	10.195	0.00201126	0.0411794	Mm.105218	B430217B02Rik	NM_176938.2	NA	RIKEN cDNA B430217B02 gene
H3030B01	1.48602	10.186	0.00201646	0.0411794	Mm.101274	2010008E23Rik	NA	AK053165.1	RIKEN cDNA 2010008E23 gene
H3038D07	1.0763	10.1808	0.00201952	0.0411794	Mm.24972	Mvp	NM_080638.1	NA	major vault protein
H3126D12	1.15667	10.176	0.00202228	0.0411794	Mm.34706	AI447928	NA	AK086311.1	expressed sequence AI447928
H3152A11	0.727975	10.1739	0.00202349	0.0411794	NA	NA	NA	NA	EST
H3100E04	4.09007	10.16	0.00203166	0.0411794	Mm.2026	Birc2	NM_007464.1	NA	baculoviral IAP repeat-containing 2
H3109E06	0.890975	10.1451	0.0020404	0.0411794	Mm.252776	Prkcn	NM_029239.2	NA	protein kinase C, nu
H3061D04	1.32018	10.1441	0.002041	0.0411794	Mm.784	Nbr1	NM_008676.1	NA	neighbor of Brca1 gene 1
H3063F02	0.749625	10.1421	0.00204216	0.0411794	Mm.20794	Anxa7	NM_009674.1	NA	annexin A7
H3109C03	1.26015	10.1368	0.00204529	0.0411794	Mm.4793	Gaa	NM_008064.2	NA	glucosidase, alpha, acid
H3054D01	1.09125	10.1351	0.00204632	0.0411794	Mm.295013	Vps11	NA	AK090030.1	vacuolar protein sorting 11 (yeast)
T412	1.86343	10.1339	0.00204699	0.0411794	Mm.125521	Rims2	NM_053271.1	NA	regulating synaptic membrane exocytosis 2
H3089D01	0.480875	10.1294	0.00204967	0.0411794	Mm.173283	NA	NA	AU016576.1	Mus musculus transcribed sequences
H3099B09	2.11068	10.121	0.00205469	0.0411794	NA	NA	NA	NA	EST
H3082F07	0.630725	10.1187	0.00205602	0.0411794	Mm.26783	BC008155	NM_145410.1	NA	cDNA sequence BC008155
H3141D05	0.547825	10.1157	0.00205784	0.0411794	Mm.197280	NA	NA	BG074954.2	Mus musculus transcribed sequences
H3044E06	0.87055	10.1154	0.00205801	0.0411794	Mm.830	Psme1	NM_011189.1	NA	proteasome (prosome, macropain) 28 subunit, alpha
H3010C06	0.908325	10.111	0.00206067	0.0411794	Mm.28688	Sars1	NM_011319.1	NA	seryl-aminoacyl-tRNA synthetase 1
H3087E01	0.8181	10.0662	0.00208765	0.0412926	Mm.259702	Anxa4	NM_013471.1	NA	annexin A4
H3113F08	1.91142	10.0651	0.00208832	0.0412926	Mm.11780	Tm7sf1	NM_031999.1	NA	transmembrane 7 superfamily member 1
H3159D12	0.37455	10.0519	0.00209636	0.0413663	Mm.247837	AW559096	NM_021548.3	NA	expressed sequence AW559096
H3120E05	0.774675	10.0223	0.00211452	0.041446	Mm.28484	Tm4sf8	NM_019793.2	NA	transmembrane 4 superfamily member 8
H3119F06	1.22795	10.0014	0.00212754	0.0414706	Mm.20971	Jrk	NM_008415.3	NA	jerky
H3029B08	1.30615	9.98872	0.00213545	0.0414956	Mm.286536	2410043F08Rik	NM_133754.1	NA	RIKEN cDNA 2410043F08 gene
H3159D08	0.405775	9.98167	0.00213987	0.0414956	Mm.142612	2610014H22Rik	NA	CA749265.1	RIKEN cDNA 2610014H22 gene
P534	1.31787	9.97635	0.00214321	0.0414956	Mm.1912	Cdkn2c	NM_007671.2	NA	cyclin-dependent kinase inhibitor 2C (p18, inhibits CDK4)
H3118D12	1.41328	9.96619	0.00214962	0.0414956	Mm.226962	AW556347	NM_183186.1	NA	expressed sequence AW556347
H3127A06	0.46085	9.95984	0.00215364	0.0414956	Mm.29532	1110063C11Rik	NM_175136.1	NA	RIKEN cDNA 1110063C11 gene
H3109F04	1.2885	9.94496	0.00216309	0.0414956	Mm.3798	Fah	NM_010176.1	NA	fumarylacetoacetate hydrolase
P924	1.6186	9.93407	0.00217004	0.0414956	Mm.280029	Hes6	NM_019479.2	NA	hairy and enhancer of split 6 (Drosophila)
H3136A03	1.09835	9.93291	0.00217079	0.0414956	Mm.277897	2900024C23Rik	NM_026062.2	NA	RIKEN cDNA 2900024C23 gene
P335	1.13722	9.9327	0.00217092	0.0414956	Mm.31630	Tcf7	NM_009331.2	NA	transcription factor 7, T-cell specific
H3084C06	1.515	9.91352	0.00218325	0.0415368	Mm.274904	1700003F10Rik	NM_133737.1	NA	RIKEN cDNA 1700003F10 gene
H3025F05	0.61	9.90862	0.00218641	0.0415368	Mm.260601	C530050O22Rik	NM_172871.1	NA	RIKEN cDNA C530050O22 gene
H3090H06	0.79755	9.89868	0.00219285	0.0415632	Mm.268910	Tmc6	NM_181321.2	NA	transmembrane channel-like gene family 6
H3054B06	0.3981	9.88302	0.00220304	0.041609	Mm.288052	D5Ertd110e	NM_133910.2	NA	DNA segment, Chr 5, ERATO Doi 110, expressed
H3113F07	1.29815	9.87929	0.00220548	0.041609	Mm.1912	Cdkn2c	NM_007671.2	NA	cyclin-dependent kinase inhibitor 2C (p18, inhibits CDK4)
H3112C02	1.53678	9.85827	0.00221927	0.041609	NA	NA	NA	NA	EST
H3153E12	1.36462	9.85382	0.00222221	0.041609	Mm.41511	1700023M09Rik	NM_025498.2	NA	RIKEN cDNA 1700023M09 gene
H3123D09	1.08448	9.85086	0.00222417	0.041609	Mm.263135	Snap25bp	NM_133854.2	NA	synaptosomal-associated protein 25 binding protein
P086	0.611925	9.84834	0.00222583	0.041609	Mm.21535	Grpel1	NM_024478.2	NA	GrpE-like 1, mitochondrial
H3029C10	0.5129	9.83543	0.00223439	0.041609	Mm.193678	AU016693	NM_178686.2	NA	expressed sequence AU016693
H3054B12	0.5199	9.82798	0.00223936	0.041609	Mm.122705	Nfe2l2	NM_010902.2	NA	nuclear, factor, erythroid derived 2, like 2
H3098B12	1.69827	9.82751	0.00223967	0.041609	Mm.35691	Fgfrl1	NM_054071.1	NA	fibroblast growth factor receptor-like 1
P104	0.518075	9.82325	0.00224251	0.041609	Mm.29873	AI463719	NM_134002.1	NA	expressed sequence AI463719
H3017A12	3.4881	9.82213	0.00224326	0.041609	Mm.230301	Syngr1	NM_009303.1	NA	synaptogyrin 1
H3114D06	1.93215	9.80173	0.00225696	0.0417704	Mm.291752	2700063A19Rik	NM_197996.1	NA	RIKEN cDNA 2700063A19 gene
H3154F07	1.1091	9.80162	0.00225704	0.0417704	Mm.87389	4930459M12Rik	NM_172470.2	NA	RIKEN cDNA 4930459M12 gene
H3065H10	0.97015	9.78147	0.00227067	0.0419439	NA	NA	NA	NA	EST
H3027A02	0.924275	9.77085	0.0022779	0.0419641	Mm.124392	Lyst	NM_010748.1	NA	lysosomal trafficking regulator
H3103C05	1.29573	9.76939	0.0022789	0.0419641	NA	NA	NA	NA	EST
H3013B10	0.360025	9.7337	0.00230344	0.0422024	Mm.28000	Ubxdc2	NM_024432.2	NA	UBX domain-containing 2
H3027E05	2.66728	9.72443	0.00230987	0.0422668	Mm.4610	Upp1	NM_009477.1	NA	uridine phosphorylase 1
H3040E02	0.87915	9.71559	0.00231602	0.0422918	Mm.298220	Nes	NM_016701.2	NA	nestin
H3126B08	0.574475	9.67704	0.00234312	0.0425497	Mm.9277	Pla2g7	NM_013737.2	NA	phospholipase A2, group VII (platelet-activating factor acetylhydrolase, plasma)
H3026H02	0.918275	9.67259	0.00234627	0.0425497	Mm.274950	Nrd1	NM_146150.2	NA	nardilysin, N-arginine dibasic convertase, NRD convertase 1
H3103B07	0.6642	9.64571	0.00236545	0.0425497	Mm.29820	Bnip3l	NM_009761.2	NA	BCL2/adenovirus E1B 19kDa-interacting protein 3-like
H3106D01	1.37345	9.63596	0.00237246	0.0425497	Mm.323251	NA	NA	BY032134.1	Mus musculus transcribed sequence with strong similarity to protein ref:NP_073729.1 (H.sapiens) microtubule-associated proteins 1A/1B light chain 3 [Homo sapiens]
H3128F01	1.31937	9.62773	0.0023784	0.0425497	Mm.28850	DXImx38e	NM_172372.1	NA	DNA segment, Chr X, Immunex 38, expressed
H3079D06	0.753675	9.62352	0.00238144	0.0425497	Mm.89579	Mpdu1	NM_011900.2	NA	mannose-P-dolichol utilization defect 1
T051	0.7052	9.61923	0.00238455	0.0425497	Mm.292869	Decr2	NM_011933.1	NA	2-4-dienoyl-Coenzyme A reductase 2, peroxisomal
H3096C05	0.51975	9.61352	0.00238869	0.0425497	Mm.69739	2810460C24Rik	NM_028360.1	NA	RIKEN cDNA 2810460C24 gene
H3105H01	1.85973	9.60221	0.00239693	0.0425497	Mm.174059	NA	NA	XM_195441.2	Mus musculus similar to RIKEN cDNA 5730469M10 (LOC269409), mRNA
H3111B07	1.32337	9.59708	0.00240068	0.0425497	Mm.4818	Cdk5	NM_007668.2	NA	cyclin-dependent kinase 5
H3056D11	0.813325	9.58009	0.00241314	0.0425497	Mm.24807	Ptgfrn	NM_011197.1	NA	prostaglandin F2 receptor negative regulator
H3041E07	0.289	9.58009	0.00241315	0.0425497	Mm.61193	D5Wsu46e	NM_144913.2	NA	DNA segment, Chr 5, Wayne State University 46, expressed
H3107C08	0.8022	9.57788	0.00241477	0.0425497	Mm.29358	2700055K07Rik	NM_026481.2	NA	RIKEN cDNA 2700055K07 gene
H3050H02	0.7219	9.57405	0.0024176	0.0425497	Mm.35605	Cdh1	NM_009864.1	NA	cadherin 1
H3038D05	1.2087	9.56637	0.00242328	0.0425497	Mm.24972	Mvp	NM_080638.1	NA	major vault protein
H3123B06	0.468975	9.56183	0.00242664	0.0425497	Mm.7361	4432411E13Rik	NA	BC051104.1	RIKEN cDNA 4432411E13 gene
H3014E06	0.373225	9.55979	0.00242816	0.0425497	Mm.11132	B3galt4	NM_019420.1	NA	UDP-Gal:betaGalNAc beta 1,3-galactosyltransferase, polypeptide 4
H3124A08	0.5946	9.5575	0.00242986	0.0425497	Mm.34008	BC023296	NM_153545.1	NA	cDNA sequence BC023296
H3111D12	1.73225	9.546	0.00243843	0.0425498	Mm.259568	Scarb2	NM_007644.2	NA	scavenger receptor class B, member 2
H3096E09	1.19467	9.54172	0.00244163	0.0425498	NA	NA	NA	NA	EST
H3080H02	0.603625	9.53794	0.00244446	0.0425498	Mm.300091	Xrcc1	NA	BY008761.1	X-ray repair complementing defective repair in Chinese hamster cells 1
H3112A05	0.60395	9.53381	0.00244755	0.0425498	Mm.246108	0910001A06Rik	NM_144846.2	NA	RIKEN cDNA 0910001A06 gene
H3073E03	0.248125	9.52567	0.00245368	0.0425498	Mm.297333	NA	NA	AF227912.1	Mus musculus 15 days embryo head cDNA, RIKEN full-length enriched library, clone:D930031I02 product:ubiquitin specific protease 29, full insert sequence
H3001F01	1.42225	9.52188	0.00245653	0.0425498	Mm.15675	Efna1	NM_010107.2	NA	ephrin A1
H3051F08	1.86355	9.46818	0.00249747	0.0430013	NA	NA	NA	NA	EST
H3010E05	0.72785	9.46617	0.00249902	0.0430013	Mm.96211	2210417O06Rik	NM_025618.1	NA	RIKEN cDNA 2210417O06 gene
H3104E08	1.83418	9.45826	0.00250513	0.0430013	NA	NA	NA	NA	EST
H3005A06	0.775575	9.45146	0.0025104	0.0430013	Mm.290110	Dnajb6	NM_011847.1	NA	DnaJ (Hsp40) homolog, subfamily B, member 6
H3022C02	0.95655	9.44627	0.00251443	0.0430013	Mm.235813	AI256711	NM_019762.1	NA	expressed sequence AI256711
H3149B03	1.08965	9.44343	0.00251664	0.0430013	Mm.268930	Cln3	NM_009907.2	NA	ceroid lipofuscinosis, neuronal 3, juvenile (Batten, Spielmeyer-Vogt disease)
H3131D12	2.92183	9.42026	0.00253477	0.0431749	Mm.283293	2310075C12Rik	NM_133739.1	NA	RIKEN cDNA 2310075C12 gene
H3096E01	1.0188	9.40024	0.00255058	0.043208	Mm.30118	Gcn5l1	NM_015740.2	NA	GCN5 general control of amino acid synthesis-like 1 (yeast)
H3027G04	0.58565	9.39086	0.00255802	0.043208	Mm.256479	Ptk2	NM_007982.1	NA	PTK2 protein tyrosine kinase 2
H3060F03	1.09628	9.38621	0.00256172	0.043208	Mm.319704	NA	NA	BY389968.1	Mus musculus transcribed sequences
H3010F09	0.662175	9.38051	0.00256628	0.043208	Mm.275943	2610529C04Rik	NM_025952.2	NA	RIKEN cDNA 2610529C04 gene
H3041B11	1.664	9.37981	0.00256683	0.043208	Mm.28146	Mvd	NM_138656.1	NA	mevalonate (diphospho) decarboxylase
H3108D06	0.422025	9.37889	0.00256757	0.043208	Mm.181004	NA	NA	BX515113.1	Mus musculus transcribed sequences
H3080H11	1.86902	9.37785	0.0025684	0.043208	Mm.154660	Plat	NM_008872.1	NA	plasminogen activator, tissue
H3028E02	1.9863	9.37588	0.00256998	0.043208	Mm.24623	Snta1	NM_009228.1	NA	syntrophin, acidic 1
H3030C08	0.52205	9.37357	0.00257183	0.043208	Mm.241109	Rsn	NM_019765.2	NA	restin (Reed-Steinberg cell-expressed intermediate filament-associated protein)
H3146G08	0.7116	9.36671	0.00257734	0.043208	Mm.4765	Hoxc9	NM_008272.2	NA	homeo box C9
T394	1.47497	9.35383	0.00258771	0.0432712	Mm.896	Il1r1	NM_008362.1	NA	interleukin 1 receptor, type I
H3153G06	0.245875	9.32012	0.00261513	0.0434944	Mm.242865	8030446C20Rik	NM_133905.1	NA	RIKEN cDNA 8030446C20 gene
H3141H06	0.37765	9.31888	0.00261615	0.0434944	Mm.252148	Phgdhl1	NA	AK035384.1	phosphoglycerate dehydrogenase like 1
H3017F03	1.14597	9.3127	0.00262122	0.0435223	Mm.29998	0610039C21Rik	NM_025802.1	NA	RIKEN cDNA 0610039C21 gene
H3119A01	0.46855	9.30766	0.00262537	0.0435473	Mm.218676	NA	NA	AW548431.2	Mus musculus transcribed sequence with moderate similarity to protein pir:OSHU7B (H.sapiens) OSHU7B cytochrome-c oxidase (EC 1.9.3.1) chain VIIb precursor - human
H3063D04	0.441825	9.29251	0.00263788	0.043624	NA	NA	NA	NA	EST
H3054H10	0.99175	9.29245	0.00263794	0.043624	Mm.33344	D14Ertd449e	NM_025311.1	NA	DNA segment, Chr 14, ERATO Doi 449, expressed
H3151B07	1.85173	9.28925	0.00264059	0.043624	Mm.288898	Mllt3	NM_029931.1	NA	myeloid/lymphoid or mixed lineage-leukemia translocation to 3 homolog (Drosophila)
H3093D11	1.5727	9.28258	0.00264613	0.0436363	Mm.296876	NA	NA	BC052791.1	Mus musculus adult male adrenal gland cDNA, RIKEN full-length enriched library, clone:B330005C17 product:hypothetical Arginine-rich region containing protein, full insert sequence
H3106H01	0.80825	9.28198	0.00264663	0.0436363	Mm.292307	AI449705	NA	BY384074.1	expressed sequence AI449705
H3157E03	1.1526	9.26824	0.0026581	0.0436942	NA	NA	NA	NA	EST
P193	0.9875	9.24009	0.0026818	0.0439455	Mm.80565	Ppp3ca	NA	AK082990.1	protein phosphatase 3, catalytic subunit, alpha isoform
P558	1.23982	9.2388	0.00268289	0.0439455	Mm.18036	E2f1	NM_007891.1	NA	E2F transcription factor 1
T093	1.00895	9.22635	0.00269347	0.0440121	Mm.85083	Cyp27a1	NM_024264.3	NA	cytochrome P450, family 27, subfamily a, polypeptide 1
H3064E02	0.88945	9.21596	0.00270234	0.0441133	Mm.217787	Atp6v1a1	NM_007508.2	NA	ATPase, H+ transporting, V1 subunit A, isoform 1
H3031C10	0.6578	9.18518	0.00272886	0.0442072	Mm.254881	Fkbp8	NM_010223.1	NA	FK506 binding protein 8
H3014H03	0.6407	9.18054	0.00273287	0.0442072	Mm.284984	Ywhag	NM_018871.2	NA	3-monooxgenase/tryptophan 5-monooxgenase activation protein, gamma polypeptide
H3027A04	0.743625	9.18048	0.00273293	0.0442072	Mm.291595	Bteb1	NM_010638.2	NA	basic transcription element binding protein 1
H3070B05	0.66635	9.17889	0.00273431	0.0442072	Mm.35796	Evi5	NM_007964.1	NA	ecotropic viral integration site 5
H3022G03	0.222025	9.17888	0.00273432	0.0442072	Mm.2462	Psmc2	NM_011188.1	NA	proteasome (prosome, macropain) 26S subunit, ATPase 2
H3093E08	1.07347	9.15043	0.00275919	0.0444684	Mm.256753	NA	NA	BY721417.1	Mus musculus transcribed sequences
H3035A08	0.7768	9.1159	0.00278978	0.0447243	Mm.262480	2010012F05Rik	NM_029362.2	NA	RIKEN cDNA 2010012F05 gene
H3076F02	1.468	9.11413	0.00279136	0.0447243	Mm.254988	2600014M03Rik	NM_178620.2	NA	RIKEN cDNA 2600014M03 gene
H3113F02	1.59642	9.10441	0.00280006	0.04482	Mm.27908	Nfatc4	NM_023699.1	NA	nuclear factor of activated T-cells, cytoplasmic, calcineurin-dependent 4
H3051H03	1.16728	9.09095	0.00281217	0.0449265	Mm.294753	Litaf	NM_019980.1	NA	LPS-induced TN factor
H3051C09	1.46728	9.08578	0.00281684	0.0449575	Mm.229334	Glmr	NM_139299.1	NA	gp130-like monocyte receptor
P345	0.19795	9.06959	0.00283153	0.0450042	Mm.8	Usf1	NM_009480.1	NA	upstream transcription factor 1
H3014G04	1.15728	9.05703	0.00284299	0.0450042	Mm.27839	D19Ertd721e	NM_146093.1	NA	DNA segment, Chr 19, ERATO Doi 721, expressed
H3066G10	1.89787	9.0517	0.00284787	0.0450042	Mm.252826	1110003E01Rik	NM_133697.1	NA	RIKEN cDNA 1110003E01 gene
H3024F12	0.34025	9.04693	0.00285225	0.0450042	Mm.1538	Btf3	NM_145455.1	NA	basic transcription factor 3
H3046H12	2.08418	9.04348	0.00285542	0.0450042	Mm.271160	Upf3b	NA	AK033035.1	UPF3 regulator of nonsense transcripts homolog B (yeast)
H3091D04	1.42893	9.04214	0.00285666	0.0450042	Mm.31267	BC037006	NA	CA752135.1	cDNA sequence BC037006
H3008G12	1.07575	9.03802	0.00286045	0.0450042	Mm.41877	5730438N18Rik	NM_027460.1	NA	RIKEN cDNA 5730438N18 gene
H3042A07	1.22497	9.02373	0.00287368	0.0451214	Mm.293517	Sdf4	NM_011341.2	NA	stromal cell derived factor 4
H3047G12	1.5238	9.01021	0.00288626	0.0451904	Mm.155209	NA	NA	CK334537.1	Mus musculus transcribed sequences
H3112G11	1.15377	9.00436	0.00289173	0.0451904	Mm.254495	1110014L17Rik	NM_134020.1	NA	RIKEN cDNA 1110014L17 gene
H3148D12	1.27848	9.00311	0.0028929	0.0451904	Mm.250419	Ccni	NM_017367.2	NA	cyclin I
P792	1.1912	9.00145	0.00289445	0.0451904	Mm.3280	Twist1	NM_011658.1	NA	twist gene homolog 1 (Drosophila)
H3092H12	0.099225	8.99975	0.00289604	0.0451904	Mm.11298	NA	NA	CK334688.1	Mus musculus transcribed sequences
H3025B03	1.2289	8.99842	0.00289729	0.0451904	Mm.193096	Scd2	NM_009128.1	NA	stearoyl-Coenzyme A desaturase 2
H3052D06	2.87513	8.99811	0.00289758	0.0451904	Mm.138440	NA	NA	AK016973.1	Mus musculus adult male testis cDNA, RIKEN full-length enriched library, clone:4933428M03 product:hypothetical BTB/POZ domain/Methylated-DNA--protein-cysteine methyltransferase containing protein, full insert sequence
H3028A07	0.635275	8.98556	0.0029094	0.0452419	Mm.5246	Ppia	NM_008907.1	NA	peptidylprolyl isomerase A
H3135A02	0.869525	8.97757	0.00291695	0.0452419	Mm.210019	Elavl1	NM_010485.2	NA	ELAV (embryonic lethal, abnormal vision, Drosophila)-like 1 (Hu antigen R)
H3092F03	2.123	8.96822	0.00292581	0.0452498	Mm.5356	6030411F23Rik	NM_133983.1	NA	RIKEN cDNA 6030411F23 gene
H3041B05	0.52285	8.94454	0.00294844	0.045557	NA	NA	NA	NA	EST
H3029H08	0.968975	8.93401	0.00295857	0.0456706	Mm.227506	D7Ertd458e	NM_027514.1	NA	DNA segment, Chr 7, ERATO Doi 458, expressed
H3091C04	0.328425	8.91651	0.00297551	0.0457461	Mm.22086	Rnf14	NM_020012.1	NA	ring finger protein 14
H3126C12	1.001	8.91511	0.00297688	0.0457461	Mm.830	Psme1	NM_011189.1	NA	proteasome (prosome, macropain) 28 subunit, alpha
H3098B11	0.834	8.90832	0.00298349	0.0457552	Mm.29866	NA	NA	BY006592.1	Mus musculus 8 days embryo whole body cDNA, RIKEN full-length enriched library, clone:5730496F02 product:HYPOTHETICAL 8.0 KDA PROTEIN homolog [Mus musculus], full insert sequence
H3021D06	1.8353	8.88473	0.00300662	0.0458221	Mm.21623	Dhrs1	NM_026819.2	NA	dehydrogenase/reductase (SDR family) member 1
H3151C12	0.660375	8.87784	0.00301342	0.0458221	NA	NA	NA	NA	EST
H3107F10	2.02142	8.8754	0.00301583	0.0458221	NA	NA	NA	NA	EST
H3005E09	0.56205	8.87337	0.00301784	0.0458221	Mm.30250	Aldh7a1	NM_138600.1	NA	aldehyde dehydrogenase family 7, member A1
H3065E03	1.0598	8.86979	0.00302138	0.0458221	Mm.9925	Idh1	NM_010497.1	NA	isocitrate dehydrogenase 1 (NADP+), soluble
H3028D02	0.37435	8.86883	0.00302234	0.0458221	Mm.4419	Rpl5	NM_016980.1	NA	ribosomal protein L5
H3038G08	1.03435	8.86577	0.00302538	0.0458221	NA	NA	NA	NA	EST
H3021C02	0.406775	8.86004	0.00303108	0.0458221	Mm.289306	Arpc4	NM_026552.1	NA	actin related protein 2/3 complex, subunit 4
H3045H02	0.873525	8.84806	0.00304305	0.0459401	Mm.19039	Got1	NM_010324.1	NA	glutamate oxaloacetate transaminase 1, soluble
H3109G09	0.55675	8.84535	0.00304575	0.0459401	Mm.273087	1500036F01Rik	NA	AK075738.1	RIKEN cDNA 1500036F01 gene
H3090A12	0.20985	8.8315	0.00305969	0.0460675	Mm.11175	425O18-1	NM_019421.2	NA	hypothetical protein 425O18-1
H3158B04	0.966325	8.82681	0.00306442	0.0460675	Mm.250214	Oazin	NM_018745.2	NA	ornithine decarboxylase antizyme inhibitor
H3143B04	1.54915	8.81818	0.00307316	0.0460675	Mm.178	Cryab	NM_009964.1	NA	crystallin, alpha B
H3118F10	2.09892	8.81573	0.00307564	0.0460675	NA	NA	NA	NA	EST
H3120E02	1.38312	8.80981	0.00308166	0.0460675	Mm.4266	Itm2b	NM_008410.1	NA	integral membrane protein 2B
H3128H02	1.12433	8.80711	0.00308442	0.0460675	Mm.268483	Taz	NM_181516.2	NA	tafazzin
H3154G08	1.59013	8.7928	0.00309904	0.0460675	Mm.182851	NA	NA	AW557930.2	Mus musculus transcribed sequences
H3035H05	0.25505	8.79191	0.00309995	0.0460675	Mm.155061	NA	NA	C77102.1	Mus musculus transcribed sequence with weak similarity to protein pir:A53798 (R.norvegicus) A53798 58K membrane-associated protein - rat
H3113F06	0.90245	8.79145	0.00310043	0.0460675	Mm.279485	Rnh1	NM_145135.2	NA	ribonuclease/angiogenin inhibitor 1
N806	0.940675	8.79123	0.00310065	0.0460675	Mm.259670	Porcn	NM_016913.1	NA	porcupine homolog (Drosophila)
H3102F08	1.38795	8.78537	0.00310668	0.0460892	Mm.22547	Asah1	NM_019734.1	NA	N-acylsphingosine amidohydrolase 1
H3011A09	0.4841	8.76823	0.00312438	0.046121	NA	NA	NA	NA	EST
H3123F01	0.658425	8.76599	0.00312671	0.046121	Mm.102915	Plxna4	NM_175750.2	NA	plexin A4
H3101B07	1.57688	8.75215	0.00314111	0.0462124	NA	NA	NA	NA	EST
H3107A12	0.87555	8.74544	0.00314813	0.0462124	Mm.5110	Ovgp1	NM_007696.2	NA	oviductal glycoprotein 1
H3115E12	2.00652	8.74494	0.00314865	0.0462124	Mm.8739	Sgce	NM_011360.2	NA	sarcoglycan, epsilon
H3010E09	1.9994	8.7432	0.00315048	0.0462124	Mm.147226	Mt2	NM_008630.1	NA	metallothionein 2
H3064C01	1.02143	8.73855	0.00315535	0.0462124	Mm.34456	2400003N08Rik	NM_178622.3	NA	RIKEN cDNA 2400003N08 gene
H3011D02	0.2758	8.70712	0.0031886	0.0465185	Mm.3555	Vdac1	NM_011694.1	NA	voltage-dependent anion channel 1
H3007G01	0.27405	8.70007	0.00319612	0.0465458	Mm.28186	Dhx8	NM_144831.1	NA	DEAH (Asp-Glu-Ala-His) box polypeptide 8
H3057E06	0.33905	8.6925	0.00320422	0.0466225	Mm.188539	NA	NA	BY667389.1	Mus musculus transcribed sequences
H3012G04	0.817175	8.67537	0.00322266	0.0467136	Mm.196604	Aamp	NM_146110.1	NA	angio-associated migratory protein
H3116D06	1.58575	8.67351	0.00322466	0.0467136	Mm.270088	AW547365	NM_133891.1	NA	expressed sequence AW547365
T095	1.78535	8.66734	0.00323134	0.0467692	Mm.28146	Mvd	NM_138656.1	NA	mevalonate (diphospho) decarboxylase
H3135D07	0.981275	8.66409	0.00323487	0.0467792	Mm.133370	Dhcr24	NM_053272.1	NA	24-dehydrocholesterol reductase
H3036E10	0.438925	8.64992	0.0032503	0.0469541	NA	NA	NA	NA	EST
H3011E10	0.960275	8.6358	0.00326577	0.0469541	Mm.288873	Arpc1a	NM_019767.1	NA	actin related protein 2/3 complex, subunit 1A
H3082D01	2.01118	8.63427	0.00326746	0.0469541	Mm.25311	1810015C04Rik	NM_025459.2	NA	RIKEN cDNA 1810015C04 gene
H3109F01	0.24545	8.63381	0.00326796	0.0469541	Mm.34002	2410015M20Rik	NM_153152.2	NA	RIKEN cDNA 2410015M20 gene
H3137C10	1.36492	8.63259	0.00326931	0.0469541	Mm.239470	Abca3	NM_013855.1	NA	ATP-binding cassette, sub-family A (ABC1), member 3
H3014E04	0.47945	8.62299	0.0032799	0.0469636	Mm.161167	NA	NA	AK010140.1	Mus musculus adult male tongue cDNA, RIKEN full-length enriched library, clone:2310073E15 product:hypothetical Galactose-binding domain-like structure containing protein, full insert sequence
H3032H02	1.4861	8.61828	0.00328511	0.0469636	Mm.28896	Stard10	NM_019990.1	NA	START domain containing 10
H3035B01	1.19368	8.61431	0.00328951	0.0469636	Mm.276018	Ifld2	NM_175093.1	NA	induced in fatty liver dystrophy 2
H3098G10	1.20637	8.60906	0.00329535	0.0469937	Mm.29870	Itm2c	NM_022417.1	NA	integral membrane protein 2C
H3027D05	1.72625	8.58626	0.00332085	0.0472369	Mm.788	Ly6e	NM_008529.2	NA	lymphocyte antigen 6 complex, locus E
H3051F01	1.46223	8.57576	0.00333267	0.0473279	Mm.214766	Ankrd6	NM_080471.2	NA	ankyrin repeat domain 6
H3106G07	0.804375	8.57533	0.00333315	0.0473279	Mm.289759	Krt2-8	NM_008344.1	NA	keratin complex 2, basic, gene 8
H3119D06	1.2211	8.57064	0.00333846	0.0473484	Mm.274599	BC025458	NA	BC048408.1	cDNA sequence BC025458
H3110H11	0.98265	8.56897	0.00334034	0.0473484	Mm.80565	Ppp3ca	NA	AK082990.1	protein phosphatase 3, catalytic subunit, alpha isoform
H3048D03	0.697975	8.56583	0.00334391	0.0473568	Mm.31330	Kif16b	NA	AK129401.1	kinesin family member 16B
H3120H10	1.72247	8.54384	0.00336898	0.0475089	NA	NA	NA	NA	EST
N833	1.08678	8.52646	0.00338896	0.0476928	Mm.180013	Aes	NM_010347.1	NA	amino-terminal enhancer of split
T056	1.15678	8.52404	0.00339176	0.0476928	Mm.2112	Ech1	NM_016772.1	NA	enoyl coenzyme A hydratase 1, peroxisomal
H3080E12	2.16927	8.5208	0.00339551	0.0476928	Mm.4381	Satb1	NM_009122.1	NA	special AT-rich sequence binding protein 1
H3080B06	0.573225	8.51995	0.00339649	0.0476928	Mm.2815	1110021H02Rik	NM_025388.1	NA	RIKEN cDNA 1110021H02 gene
H3120C02	0.671975	8.48966	0.0034318	0.0479853	NA	NA	NA	NA	EST
H3115D09	0.6829	8.48663	0.00343536	0.0479853	Mm.5360	NA	NA	AK079326.1	Mus musculus 16 days neonate cerebellum cDNA, RIKEN full-length enriched library, clone:9630025B04 product:unclassifiable, full insert sequence
H3114B06	1.89915	8.48077	0.00344226	0.0479853	NA	NA	NA	NA	EST
P523	1.37387	8.48037	0.00344272	0.0479853	Mm.18571	Zfp36l1	NM_007564.2	NA	zinc finger protein 36, C3H type-like 1
H3011E09	0.2738	8.47566	0.00344829	0.0479853	Mm.133292	Actb	NM_178242.2	NA	actin, beta, cytoplasmic
H3119C02	0.73275	8.47043	0.00345447	0.0479853	Mm.171489	NA	NA	AK029713.1	Mus musculus adult male testis cDNA, RIKEN full-length enriched library, clone:4930500O05 product:NAG-5 PROTEIN homolog [Homo sapiens], full insert sequence
P500	2.00933	8.46736	0.00345811	0.0479853	Mm.179747	Itga7	NM_008398.1	NA	integrin alpha 7
H3125D09	0.60755	8.43967	0.00349115	0.0482406	Mm.180337	3110002K08Rik	NM_133726.1	NA	RIKEN cDNA 3110002K08 gene
H3078A10	0.8996	8.42377	0.00351032	0.0483442	Mm.249822	Bre	NM_144541.1	NA	brain and reproductive organ-expressed protein
H3156E08	0.8341	8.4233	0.00351088	0.0483442	Mm.30153	2410166I05Rik	NM_029759.2	NA	RIKEN cDNA 2410166I05 gene
P555	2.05952	8.42129	0.00351332	0.0483442	Mm.86386	Dffb	NM_007859.2	NA	DNA fragmentation factor, beta subunit
H3021E03	0.832525	8.42044	0.00351435	0.0483442	Mm.102104	Tegt	NM_018786.1	NA	testis enhanced gene transcript
H3129D08	0.890075	8.41512	0.00352079	0.0483442	Mm.262547	Ing4	NM_144510.1	NA	inhibitor of growth family, member 4
H3107H08	0.754825	8.40685	0.00353085	0.0483442	Mm.288737	1200015A19Rik	NM_026388.1	NA	RIKEN cDNA 1200015A19 gene
H3081F05	0.76485	8.40555	0.00353244	0.0483442	NA	NA	NA	NA	EST
H3091E07	0.71175	8.40552	0.00353247	0.0483442	Mm.180052	Ube2d2	NM_019912.1	NA	ubiquitin-conjugating enzyme E2D 2
H3151C10	0.792525	8.39041	0.00355096	0.048462	Mm.29830	4930524H12Rik	NM_025789.2	NA	RIKEN cDNA 4930524H12 gene
H3085B10	1.42057	8.39013	0.00355131	0.048462	Mm.12607	Lmo1	NM_057173.1	NA	LIM domain only 1
H3031C09	1.1174	8.38461	0.0035581	0.0484743	Mm.27063	Trip6	NM_011639.2	NA	thyroid hormone receptor interactor 6
H3109H04	1.26792	8.37227	0.00357334	0.0485918	Mm.150	Fcgr1	NM_010186.2	NA	Fc receptor, IgG, high affinity I
H3047F08	1.24552	8.36815	0.00357845	0.0485918	Mm.291528	AI429612	NA	AK078786.1	expressed sequence AI429612
H3100G09	0.8536	8.36798	0.00357865	0.0485918	Mm.259204	Dpf2	NM_011262.1	NA	D4, zinc and double PHD fingers family 2
H3045G03	0.7496	8.36356	0.00358414	0.0485918	Mm.172811	NA	NA	C79999.1	Mus musculus transcribed sequences
H3057G10	1.2504	8.34681	0.00360505	0.0486462	Mm.272130	Pscd2	NM_011181.2	NA	pleckstrin homology, Sec7 and coiled-coil domains 2
H3113C06	0.45045	8.34519	0.00360708	0.0486462	Mm.46754	Slc38a2	NM_175121.3	NA	solute carrier family 38, member 2
P850	0.711125	8.34423	0.00360829	0.0486462	Mm.270065	Gas5	NM_013525.1	NA	growth arrest specific 5
H3018G08	1.511	8.34264	0.00361028	0.0486462	Mm.247946	Gale	NM_178389.2	NA	galactose-4-epimerase, UDP
H3060C07	0.855925	8.33952	0.0036142	0.0486462	Mm.293175	A630082K20Rik	NA	AK035529.1	RIKEN cDNA A630082K20 gene
H3144G12	1.83603	8.33843	0.00361556	0.0486462	Mm.24193	Gpc1	NM_016696.1	NA	glypican 1
H3120B08	1.15433	8.33418	0.00362092	0.0486462	Mm.41438	2310012M18Rik	NM_027315.2	NA	RIKEN cDNA 2310012M18 gene
N828	0.510425	8.32723	0.0036297	0.0486974	NA	NA	NA	NA	EST
P369	0.68705	8.30513	0.00365777	0.0489345	Mm.268548	Max	NM_008558.1	NA	Max protein
H3013H03	1.77705	8.3009	0.00366318	0.0489345	Mm.243941	Man1a	NM_177131.2	NA	mannosidase 1, alpha
H3029F03	1.149	8.29664	0.00366864	0.0489677	Mm.70371	2310005E10Rik	NM_172398.2	NA	RIKEN cDNA 2310005E10 gene
H3012H06	0.694925	8.29219	0.00367435	0.0489999	Mm.159915	D1Ucla4	NM_153555.1	NA	DNA segment, Chr 1, University of California at Los Angeles 4
H3029D08	1.62403	8.28867	0.00367887	0.0489999	NA	NA	NA	NA	EST
P804	0.348625	8.28176	0.00368778	0.0489999	Mm.4932	Hoxd1	NM_010467.1	NA	homeo box D1
H3059D12	1.85688	8.28025	0.00368973	0.0489999	NA	NA	NA	NA	EST
H3108E04	0.699	8.27436	0.00369734	0.0489999	Mm.73397	Plxnb1	NM_172775.1	NA	plexin B1
H3018C08	0.634325	8.26992	0.00370311	0.0489999	Mm.30085	Akr1a4	NM_021473.2	NA	aldo-keto reductase family 1, member A4 (aldehyde reductase)
P709	0.721775	8.26659	0.00370743	0.0489999	Mm.248360	Anxa1	NM_010730.1	NA	annexin A1
T355	1.61635	8.26576	0.00370852	0.0489999	NA	NA	NA	NA	EST
H3053E07	1.04015	8.25856	0.00371789	0.0490683	Mm.286006	Als2cr2	NM_172656.3	NA	amyotrophic lateral sclerosis 2 (juvenile) chromosome region, candidate 2 homolog (human)
H3031F07	0.650925	8.25581	0.00372149	0.0490766	Mm.214371	Mare	NM_181569.1	NA	alpha globin regulatory element containing gene
H3122D07	0.171975	8.24673	0.00373337	0.0491545	Mm.209419	Hspa9a	NM_010481.1	NA	heat shock protein, A
H3055G06	1.71588	8.23153	0.00375339	0.0492083	Mm.3484	Npc1	NM_008720.1	NA	Niemann Pick type C1
H3097G02	0.936325	8.22638	0.0037602	0.0492083	Mm.70065	NA	NA	AK088561.1	Mus musculus 2 days neonate thymus thymic cells cDNA, RIKEN full-length enriched library, clone:E430020E24 product:unknown EST, full insert sequence
H3138B03	0.482625	8.22241	0.00376546	0.0492083	Mm.135991	1810013L24Rik	NA	BC038008.1	RIKEN cDNA 1810013L24 gene
H3155G01	0.53935	8.21863	0.00377049	0.0492083	Mm.288183	0610039K22Rik	NM_025346.1	NA	RIKEN cDNA 0610039K22 gene
H3023G12	2.12798	8.21453	0.00377594	0.0492083	NA	NA	NA	NA	EST
H3036B12	1.65177	8.21426	0.00377629	0.0492083	Mm.29609	D19Ertd144e	NM_026373.1	NA	DNA segment, Chr 19, ERATO Doi 144, expressed
H3022E09	1.4849	8.20625	0.00378698	0.0493086	Mm.23156	Adamts4	NM_172845.1	NA	a disintegrin-like and metalloprotease (reprolysin type) with thrombospondin type 1 motif, 4
H3004E03	0.66085	8.18416	0.00381668	0.0495877	Mm.23347	Pla2g5	NM_011110.2	NA	phospholipase A2, group V
H3007E02	1.7225	8.18224	0.00381927	0.0495877	Mm.426	Gstp2	NM_013541.1	NA	glutathione S-transferase, pi 2
H3054C05	0.7483	8.18136	0.00382046	0.0495877	Mm.278357	Kns2	NM_008450.1	NA	kinesin 2
H3060C05	0.63215	8.17541	0.00382852	0.0495917	Mm.280920	Rnf25	NM_021313.1	NA	ring finger protein 25
T110	0.8223	8.17447	0.0038298	0.0495917	Mm.206934	Mbtps1	NM_019709.2	NA	membrane-bound transcription factor protease, site 1
H3011H02	1.82458	8.16921	0.00383695	0.0496139	NA	NA	NA	NA	EST
H3152C08	0.9343	8.16368	0.00384448	0.0496579	NA	NA	NA	NA	EST
H3097H06	0.287525	8.16185	0.00384697	0.0496579	NA	NA	NA	NA	EST
H3112C05	1.63478	8.15873	0.00385124	0.0496605	NA	NA	NA	NA	EST
H3138G08	0.878875	8.14331	0.00387239	0.0497521	Mm.293635	1700020E22Rik	NM_030054.2	NA	RIKEN cDNA 1700020E22 gene
P688	0.738425	8.13274	0.00388699	0.0498081	Mm.4432	Hoxd3	NM_010468.1	NA	homeo box D3
T216	1.23235	8.13209	0.00388789	0.0498081	Mm.218381	Hps1	NM_019424.1	NA	Hermansky-Pudlak syndrome 1 homolog (human)
H3102C06	1.5219	8.12851	0.00389285	0.0498081	Mm.274553	Slc6a8	NM_133987.1	NA	solute carrier family 6 (neurotransmitter transporter, creatine), member 8
H3116H11	1.052	8.11981	0.00390493	0.049859	Mm.28449	B230219D22Rik	NM_181278.2	NA	RIKEN cDNA B230219D22 gene
H3116D11	0.340675	8.11554	0.00391088	0.0498963	Mm.3819	Cox7a2	NM_007730.1	NA	cytochrome c oxidase, subunit VIIa 2
H3139F02	0.28685	8.11271	0.00391483	0.0499081	Mm.218669	Tcea1	NM_011541.3	NA	transcription elongation factor A (SII) 1
H3128A03	1.54078	8.1053	0.0039252	0.0499629	Mm.289674	3010033I09Rik	NM_030066.1	NA	RIKEN cDNA 3010033I09 gene
H3039E03	0.802925	8.10099	0.00393125	0.0499864	Mm.172693	NA	NA	C78177.1	Mus musculus transcribed sequences

## Sheet: Lipo fdr 05 down
MPCs FUS-CHOP TUMOR First Round Vs MPCs FUS-CHOP before injection FDR 5% repressed transcripts
clone	M	t	pvalue	adjpv	UniGene	Gene.name	RefSeq	GeneBank	Annotation
P080	-2.92975	-181.009	3.71808e-07	0.00612405	Mm.294007	Pace4	NA	BC058542.1	paired basic amino acid cleaving system 4
H3003A01	-1.39672	-85.0441	3.58361e-06	0.0120027	Mm.240566	4432406C08Rik	NA	BY060365.1	RIKEN cDNA 4432406C08 gene
H3025G02	-0.89775	-70.312	6.33967e-06	0.0120027	Mm.6787	Sfrs3	NM_013663.3	NA	splicing factor, arginine/serine-rich 3 (SRp20)
H3140E05	-0.4222	-69.1837	6.65477e-06	0.0120027	Mm.233534	Gnpnat1	NM_019425.1	NA	glucosamine-phosphate N-acetyltransferase 1
P654	-4.90777	-68.587	6.82987e-06	0.0120027	Mm.1810	Ctgf	NM_010217.1	NA	connective tissue growth factor
H3040E05	-0.401575	-62.9277	8.84201e-06	0.0121278	Mm.279437	Cfdp	NM_011801.1	NA	craniofacial development protein 1
P598	-2.88227	-54.2403	1.3803e-05	0.0130235	Mm.1571	Cdh11	NM_009866.2	NA	cadherin 11
H3109B09	-3.4192	-53.0909	1.47183e-05	0.0130235	Mm.41758	Jam2	NM_023844.2	NA	junction adhesion molecule 2
H3012D06	-2.16695	-50.7897	1.68089e-05	0.0130235	Mm.228	Homer2	NA	CA772856.1	homer homolog 2 (Drosophila)
H3120A11	-0.382375	-49.4714	1.81873e-05	0.0130235	Mm.64104	2410016F19Rik	NM_026113.2	NA	RIKEN cDNA 2410016F19 gene
H3048A01	-0.670925	-45.9602	2.2677e-05	0.0130235	Mm.46847	4930469P12Rik	NM_133688.1	NA	RIKEN cDNA 4930469P12 gene
H3017D03	-1.80678	-45.2659	2.37352e-05	0.0130314	Mm.293614	Cxcl7	NM_023785.1	NA	chemokine (C-X-C motif) ligand 7
H3114A12	-0.997225	-44.09	2.56831e-05	0.0134031	Mm.291062	NA	NA	CA567268.1	Mus musculus similar to DYSKERIN (LOC245474), mRNA
H3029A02	-1.25648	-43.0029	2.76779e-05	0.0134031	Mm.37249	Shyc	NM_011370.1	NA	selective hybridizing clone
H3149F09	-2.70788	-38.5314	3.84569e-05	0.0154494	Mm.1571	Cdh11	NM_009866.2	NA	cadherin 11
H3085H02	-1.5801	-38.113	3.97353e-05	0.0155829	Mm.71015	2700053F16Rik	NM_028295.1	NA	RIKEN cDNA 2700053F16 gene
P037	-2.8861	-35.4332	4.94307e-05	0.0170753	Mm.465	Cxcl12	NM_013655.2	NA	chemokine (C-X-C motif) ligand 12
H3033C10	-0.78765	-34.9481	5.15137e-05	0.0170753	Mm.218317	4930553M18Rik	NM_029248.1	NA	RIKEN cDNA 4930553M18 gene
H3114F11	-1.24975	-34.5696	5.3221e-05	0.0170753	Mm.249364	Ifngr2	NM_008338.2	NA	interferon gamma receptor 2
H3057F09	-0.45125	-34.1769	5.50728e-05	0.0170753	Mm.258589	Map3k7	NM_172688.1	NA	mitogen activated protein kinase kinase kinase 7
H3103A05	-0.6491	-33.7823	5.70212e-05	0.0170753	Mm.4186	Pla2g4a	NM_008869.2	NA	phospholipase A2, group IVA (cytosolic, calcium-dependent)
H3076D11	-1.37437	-33.5802	5.80544e-05	0.0170753	Mm.11747	E2f7	NM_178609.3	NA	E2F transcription factor 7
H3059G03	-0.473	-32.426	6.4462e-05	0.0177727	Mm.28683	Trfr	NM_011638.3	NA	transferrin receptor
H3071B05	-0.800275	-32.174	6.59854e-05	0.0177727	Mm.240490	1200009K13Rik	NM_025814.1	NA	RIKEN cDNA 1200009K13 gene
H3024G01	-0.472525	-32.0555	6.67181e-05	0.0177727	Mm.5048	Mcm5	NM_008566.1	NA	minichromosome maintenance deficient 5, cell division cycle 46 (S. cerevisiae)
H3136C06	-1.04323	-30.4184	7.80501e-05	0.0185864	Mm.193922	Lphn2	NA	AK084598.1	latrophilin 2
H3100B10	-0.46605	-30.4157	7.80709e-05	0.0185864	NA	NA	NA	NA	EST
H3040G06	-1.96465	-29.9154	8.20432e-05	0.0185864	Mm.260256	Eif4g1	NA	BC021441.1	eukaryotic translation initiation factor 4, gamma 1
H3015E01	-0.85585	-29.2635	8.76333e-05	0.0186861	Mm.253902	C030004C14Rik	NM_030153.1	NA	RIKEN cDNA C030004C14 gene
H3117B01	-1.77307	-28.985	9.01764e-05	0.0186861	Mm.294136	Ccnd2	NM_009829.2	NA	cyclin D2
H3042C07	-1.22847	-28.8028	9.18933e-05	0.0186861	Mm.34366	Hbxap	NA	BC054454.1	hepatitis B virus x associated protein
H3007A03	-1.7161	-28.5209	9.46374e-05	0.0190094	Mm.89940	Adam19	NM_009616.2	NA	a disintegrin and metalloproteinase domain 19 (meltrin beta)
H3093B06	-1.1762	-28.3787	9.60625e-05	0.0190632	Mm.12647	D2Ertd145e	NA	CA752295.1	DNA segment, Chr 2, ERATO Doi 145, expressed
H3052E08	-0.923225	-27.3445	0.000107343	0.0193403	Mm.5002	9130213B05Rik	NM_145562.1	NA	RIKEN cDNA 9130213B05 gene
H3047B10	-1.1047	-27.266	0.00010827	0.0193403	Mm.4505	Gart	NM_010256.1	NA	phosphoribosylglycinamide formyltransferase
P807	-2.11675	-26.8893	0.000112869	0.0193403	Mm.3217	Ass1	NM_007494.2	NA	argininosuccinate synthetase 1
H3124E04	-3.60003	-26.8829	0.00011295	0.0193403	Mm.465	Cxcl12	NM_013655.2	NA	chemokine (C-X-C motif) ligand 12
H3106H07	-3.4189	-26.6247	0.000116256	0.0193403	Mm.207106	Slco2a1	NM_033314.1	NA	solute carrier organic anion transporter family, member 2a1
H3051D07	-0.686175	-26.556	0.000117158	0.0193403	Mm.22363	Rarsl	NM_181406.2	NA	arginyl-tRNA synthetase-like
H3004C10	-0.508625	-26.4666	0.000118344	0.0193403	NA	NA	NA	NA	EST
H3070D09	-0.95125	-26.3609	0.000119768	0.0193403	Mm.9002	Ube3a	NM_173010.1	NA	ubiquitin protein ligase E3A
H3123E09	-1.14415	-26.0413	0.000124217	0.0193861	Mm.4189	Ccna2	NM_009828.1	NA	cyclin A2
H3049H10	-1.96192	-25.7384	0.000128638	0.0193861	Mm.150903	Prkwnk1	NM_198703.1	NA	protein kinase, lysine deficient 1
P407	-2.25045	-25.6448	0.000130048	0.0193861	Mm.250422	Serpine1	NM_008871.1	NA	serine (or cysteine) proteinase inhibitor, clade E, member 1
H3009H08	-0.74575	-25.6381	0.000130149	0.0193861	Mm.22421	5730442A20Rik	NM_019766.2	NA	RIKEN cDNA 5730442A20 gene
H3076H09	-1.97742	-25.4916	0.000132398	0.0193861	Mm.296679	NA	NA	BY362412.1	Mus musculus similar to Munc13-3 (LOC235480), mRNA
H3124A02	-2.91755	-25.3442	0.000134713	0.0193861	Mm.3063	Ptn	NM_008973.1	NA	pleiotrophin
H3094B06	-1.1336	-25.3385	0.000134803	0.0193861	Mm.242814	Son	NA	BC051200.1	Son cell proliferation protein
H3009F11	-0.775725	-25.3366	0.000134833	0.0193861	Mm.13705	Rrbp1	NM_024281.1	NA	ribosome binding protein 1
H3025E08	-0.938975	-23.6821	0.000164978	0.0213965	Mm.89341	Hsp70-4	NM_015765.1	NA	heat shock protein 4
H3044E02	-0.159675	-23.319	0.000172773	0.0214154	Mm.99	Rrm2	NM_009104.1	NA	ribonucleotide reductase M2
H3101E06	-0.3594	-23.1351	0.000176907	0.0215908	Mm.245938	0610040D20Rik	NM_023153.2	NA	RIKEN cDNA 0610040D20 gene
H3022A05	-0.8082	-22.8722	0.000183048	0.022169	Mm.86744	Rab23	NM_008999.2	NA	RAB23, member RAS oncogene family
P331	-0.879975	-22.763	0.000185683	0.0222657	Mm.88761	Tbx15	NM_009323.1	NA	T-box 15
H3027D07	-0.4663	-22.6294	0.000188976	0.0222657	Mm.324697	Hmgb1	NA	BY017328.1	high mobility group box 1
H3053H10	-3.2597	-22.6183	0.000189254	0.0222657	Mm.193274	2610028F08Rik	NM_172815.1	NA	RIKEN cDNA 2610028F08 gene
H3101H02	-1.0125	-22.3072	0.000197244	0.0224124	Mm.288176	A930014J19Rik	NA	CA749525.1	RIKEN cDNA A930014J19 gene
H3117H11	-0.2869	-22.273	0.000198149	0.0224124	Mm.1243	Rxrb	NM_011306.2	NA	retinoid X receptor beta
H3150E08	-1.6116	-22.2632	0.000198409	0.0224124	Mm.321048	Map4k5	NA	AK084986.1	mitogen-activated protein kinase kinase kinase kinase 5
P114	-3.4834	-22.2028	0.000200025	0.0224124	Mm.18888	Lum	NM_008524.1	NA	lumican
H3036A06	-1.13265	-21.8806	0.000208947	0.0226185	Mm.253090	Ap2a2	NM_007459.2	NA	adaptor protein complex AP-2, alpha 2 subunit
H3013F02	-0.982375	-21.7987	0.000211299	0.0226185	Mm.249363	Stk6	NA	CA566567.1	serine/threonine kinase 6
H3052A02	-0.445675	-21.7925	0.000211478	0.0226185	Mm.302604	NA	NA	C85567.1	Mus musculus transcribed sequences
H3047E02	-0.725175	-21.5769	0.000217849	0.0231155	Mm.268922	E030041M21Rik	NM_029166.1	NA	RIKEN cDNA E030041M21 gene
H3023C08	-1.0113	-21.5411	0.000218931	0.0231155	Mm.197486	Rrm1	NM_009103.2	NA	ribonucleotide reductase M1
H3066F03	-0.83385	-21.1755	0.000230406	0.0238814	Mm.72773	Drctnnb1a	NM_053090.1	NA	down-regulated by Ctnnb1, a
T080	-1.47388	-21.1715	0.000230535	0.0238814	Mm.3711	Gpd2	NM_010274.2	NA	glycerol phosphate dehydrogenase 2, mitochondrial
H3153F11	-1.90085	-21.0527	0.00023444	0.0241341	Mm.22379	5730555F13Rik	NM_025690.1	NA	RIKEN cDNA 5730555F13 gene
H3138F10	-0.557	-20.633	0.000248956	0.0250034	Mm.3059	Nsmaf	NM_010945.1	NA	neutral sphingomyelinase (N-SMase) activation associated factor
H3076E08	-0.730825	-20.5088	0.00025348	0.0250341	Mm.257482	Aatf	NM_019816.1	NA	apoptosis antagonizing transcription factor
H3049G02	-1.44243	-20.5002	0.000253797	0.0250341	Mm.9086	Slc16a1	NM_009196.2	NA	solute carrier family 16 (monocarboxylic acid transporters), member 1
T372	-4.76762	-20.3427	0.000259706	0.025462	Mm.27254	Enpp1	NM_008813.2	NA	ectonucleotide pyrophosphatase/phosphodiesterase 1
H3055B11	-0.502075	-20.1427	0.000267473	0.0257634	Mm.25429	Nrf1	NM_010938.2	NA	nuclear respiratory factor 1
H3059B07	-0.731175	-20.0154	0.000272577	0.0259402	Mm.289657	Jak1	NM_146145.1	NA	Janus kinase 1
H3128B11	-1.16443	-20.0025	0.000273103	0.0259402	Mm.271990	4930402H24Rik	NM_029432.1	NA	RIKEN cDNA 4930402H24 gene
H3120A06	-0.822925	-19.5485	0.00029245	0.0265242	Mm.278808	AA408582	NM_153806.1	NA	expressed sequence AA408582
H3017D08	-1.55947	-19.534	0.000293101	0.0265242	Mm.27695	2700079K05Rik	NM_144545.1	NA	RIKEN cDNA 2700079K05 gene
H3122D03	-1.2304	-19.4861	0.000295251	0.0265242	Mm.40268	Pdgfc	NM_019971.2	NA	platelet-derived growth factor, C polypeptide
H3015A12	-0.451925	-19.4372	0.000297473	0.0265242	Mm.249648	AW547186	NM_177592.2	NA	expressed sequence AW547186
H3070C02	-0.9026	-19.4275	0.000297916	0.0265242	Mm.11982	NA	NA	CA567630.1	Mus musculus hypothetical LOC237436 (LOC237436), mRNA
H3120A02	-0.77655	-19.0998	0.000313411	0.0270794	Mm.292016	Sfrs7	NM_146083.1	NA	splicing factor, arginine/serine-rich 7
H3035F11	-1.34397	-19.0419	0.000316261	0.0270794	Mm.122600	Nek2	NM_010892.1	NA	NIMA (never in mitosis gene a)-related expressed kinase 2
H3009A10	-0.609925	-18.8872	0.000324044	0.0270944	Mm.167218	NA	NA	BY668169.1	Mus musculus transcribed sequences
H3025G01	-0.8634	-18.8587	0.000325505	0.0270944	Mm.6787	Sfrs3	NM_013663.3	NA	splicing factor, arginine/serine-rich 3 (SRp20)
H3087H01	-3.32077	-18.7107	0.000333239	0.0270944	Mm.41758	Jam2	NM_023844.2	NA	junction adhesion molecule 2
H3080A05	-0.316	-18.6836	0.000334681	0.0270944	NA	NA	NA	NA	EST
H3033E10	-4.59675	-18.5369	0.000342632	0.0270944	Mm.27254	Enpp1	NM_008813.2	NA	ectonucleotide pyrophosphatase/phosphodiesterase 1
H3010C09	-0.333325	-18.5066	0.000344305	0.0270944	Mm.29801	1110011K10Rik	NM_170777.3	NA	RIKEN cDNA 1110011K10 gene
H3018G05	-0.58605	-18.4688	0.000346412	0.0270944	Mm.280311	Mki67ip	NM_026472.2	NA	Mki67 (FHA domain) interacting nucleolar phosphoprotein
H3135D11	-0.911375	-18.4685	0.000346425	0.0270944	Mm.646	Tpm2	NM_009416.2	NA	tropomyosin 2, beta
H3067F08	-0.643	-18.4432	0.000347843	0.0270944	Mm.319618	NA	NA	BY771818.1	Mus musculus transcribed sequence with weak similarity to protein ref:NP_081764.1 (M.musculus) RIKEN cDNA 5730493B19 [Mus musculus]
H3064E04	-0.363125	-18.4052	0.000349988	0.0270944	NA	NA	NA	NA	EST
H3029H06	-0.70435	-18.3354	0.000353972	0.0270944	Mm.196532	Sf3b2	NM_030109.1	NA	splicing factor 3b, subunit 2
H3107B04	-1.017	-18.2742	0.000357515	0.0270944	Mm.3411	Orc2l	NM_008765.2	NA	origin recognition complex, subunit 2-like (S. cerevisiae)
H3051G06	-1.57502	-18.2251	0.000360393	0.0270944	Mm.245537	2310057G13Rik	NA	CA748301.1	RIKEN cDNA 2310057G13 gene
H3069C05	-0.80505	-18.2118	0.000361176	0.0270944	Mm.24765	Rnf20	NM_182999.1	NA	ring finger protein 20
H3029E03	-1.09515	-18.1799	0.000363067	0.0270944	Mm.23695	Dhfr	NM_010049.2	NA	dihydrofolate reductase
H3159B11	-0.80315	-18.1777	0.000363195	0.0270944	Mm.13080	Gng12	NM_025278.2	NA	guanine nucleotide binding protein (G protein), gamma 12
H3020D10	-0.784525	-18.1295	0.000366079	0.0270944	Mm.279195	Idh3a	NM_029573.2	NA	isocitrate dehydrogenase 3 (NAD+) alpha
T295	-1.21083	-18.0803	0.000369053	0.0270944	Mm.2679	Agtr2	NM_007429.2	NA	angiotensin II receptor, type 2
T388	-0.60895	-17.731	0.000391128	0.0279504	Mm.155696	Bet1l	NM_018742.3	NA	blocked early in transport 1 homolog (S. cerevisiae)-like
H3026C06	-0.877275	-17.5364	0.000404195	0.0284509	Mm.258939	Abr	NM_198018.1	NA	active BCR-related gene
H3013G09	-0.581675	-17.4128	0.000412794	0.0286794	Mm.326952	NA	NA	CA568544.1	Mus musculus transcribed sequence with strong similarity to protein pir:S50853 (H.sapiens) S50853 translation releasing factor eRF-1 [validated] - human
H3120B04	-0.296975	-17.3595	0.000416579	0.0286794	NA	NA	NA	NA	EST
H3029A05	-0.88205	-17.3066	0.00042038	0.0286794	Mm.196805	Cse1l	NM_023565.1	NA	chromosome segregation 1-like (S. cerevisiae)
H3099G08	-0.8692	-17.2266	0.000426213	0.0286794	Mm.11480	2810470K21Rik	NM_023323.2	NA	RIKEN cDNA 2810470K21 gene
H3148E12	-0.87315	-17.1972	0.000428387	0.0286794	Mm.39739	Hspa12a	NM_175199.1	NA	heat shock 70kDa protein 12A
H3049E07	-0.94465	-17.1919	0.000428778	0.0286794	Mm.279195	Idh3a	NM_029573.2	NA	isocitrate dehydrogenase 3 (NAD+) alpha
H3128E09	-0.87145	-17.1392	0.000432718	0.0286794	Mm.267986	BC020002	NM_145374.1	NA	cDNA sequence BC020002
H3004D11	-1.60565	-17.1049	0.000435302	0.0286794	Mm.57250	Hic1	NM_010430.1	NA	hypermethylated in cancer 1
H3143H12	-1.56793	-16.9542	0.000446916	0.0291457	Mm.253800	Gls	NA	BC050208.1	glutaminase
P443	-2.43122	-16.8959	0.000451519	0.0291457	Mm.182434	Fstl1	NM_008047.2	NA	follistatin-like 1
H3127A04	-1.97405	-16.8774	0.000452997	0.0291457	Mm.123110	Spnb2	NM_009260.1	NA	spectrin beta 2
H3082E12	-1.2798	-16.8506	0.000455138	0.0291696	Mm.945	Ptpre	NM_011212.2	NA	protein tyrosine phosphatase, receptor type, E
H3031C08	-0.723325	-16.7814	0.000460749	0.0292089	Mm.80699	Sorbs1	NA	AK087553.1	sorbin and SH3 domain containing 1
H3067A12	-1.22555	-16.7286	0.000465082	0.0292112	Mm.222184	Nup37	NM_027191.1	NA	nucleoporin 37
H3075F03	-2.37138	-16.7124	0.000466429	0.0292112	Mm.301250	NA	NA	BY372073.1	Mus musculus transcribed sequence with weak similarity to protein sp:P09871 (H.sapiens) C1S_HUMAN Complement C1s component precursor (C1 esterase)
H3018F05	-1.4097	-16.5986	0.000476	0.0292823	Mm.292991	Cdh3	NA	BY002779.1	cadherin 3
H3078C08	-0.752075	-16.5126	0.000483412	0.0292823	Mm.209989	Kremen	NM_032396.1	NA	kringle containing transmembrane protein
H3076H10	-0.42105	-16.5071	0.000483894	0.0292823	Mm.51136	Csnk2a2	NM_009974.2	NA	casein kinase II, alpha 2, polypeptide
H3104G10	-1.1614	-16.5052	0.000484057	0.0292823	Mm.44142	E030025C11Rik	NM_177343.2	NA	RIKEN cDNA E030025C11 gene
H3141F12	-3.6022	-16.4586	0.000488145	0.0292823	Mm.3126	Fhl1	NM_010211.1	NA	four and a half LIM domains 1
H3049C04	-1.1494	-16.4089	0.00049256	0.0292823	Mm.25259	NA	NA	AK087025.1	Mus musculus 0 day neonate lung cDNA, RIKEN full-length enriched library, clone:E030020K21 product:weakly similar to HYPOTHETICAL 13.8 KDA PROTEIN [Homo sapiens], full insert sequence
H3018B09	-1.58197	-16.4039	0.000493001	0.0292823	NA	NA	NA	NA	EST
H3029D05	-1.88595	-16.3678	0.000496241	0.0292823	Mm.244618	Ablim1	NM_178688.2	NA	actin-binding LIM protein 1
H3078F07	-1.30915	-16.3279	0.000499859	0.0292823	Mm.294985	1810029B16Rik	NM_025465.1	NA	RIKEN cDNA 1810029B16 gene
H3007F05	-0.4722	-16.3128	0.000501233	0.0292823	Mm.4595	Fbl	NM_007991.2	NA	fibrillarin
H3098A09	-1.22905	-16.3116	0.000501342	0.0292823	Mm.275054	AU040950	NM_134065.2	NA	expressed sequence AU040950
H3029D04	-0.297175	-16.1841	0.000513178	0.0295544	Mm.275376	Doc2a	NM_010069.1	NA	double C2, alpha
H3129B03	-0.76955	-16.1463	0.000516755	0.0295962	Mm.29746	Mrpl3	NM_053159.2	NA	mitochondrial ribosomal protein L3
H3025H01	-0.6251	-16.1004	0.000521149	0.0297018	Mm.2948	H2-Ke2	NM_010385.1	NA	H2-K region expressed gene 2
H3011A06	-1.4037	-15.975	0.000533405	0.0298908	Mm.250567	2010317E03Rik	NM_026438.2	NA	RIKEN cDNA 2010317E03 gene
H3003B12	-1.18748	-15.9736	0.000533538	0.0298908	Mm.32644	NA	NA	BC037519.1	Mus musculus, clone IMAGE:3329409, mRNA
H3029F01	-2.33752	-15.869	0.000544062	0.0300713	Mm.28209	Perp	NM_022032.1	NA	PERP, TP53 apoptosis effector
H3081F07	-0.6816	-15.8218	0.000548899	0.0301658	NA	NA	NA	NA	EST
H3018H01	-0.946825	-15.6993	0.000561719	0.0303229	Mm.310987	Bub3	NA	AK083742.1	budding uninhibited by benzimidazoles 3 homolog (S. cerevisiae)
H3013B12	-0.69915	-15.6633	0.000565564	0.0303229	Mm.252542	D10Ertd718e	NM_025602.1	NA	DNA segment, Chr 10, ERATO Doi 718, expressed
H3040A09	-1.34747	-15.6454	0.000567489	0.0303229	Mm.248373	D630010I07	NM_177615.2	NA	hypothetical protein D630010I07
H3018E09	-0.999975	-15.634	0.000568725	0.0303229	Mm.253564	Strm	NM_011501.1	NA	striamin
H3036E08	-1.21035	-15.6266	0.000569525	0.0303229	NA	NA	NA	NA	EST
H3099A09	-0.93855	-15.4928	0.000584263	0.0303577	Mm.138512	BC024806	NM_172291.1	NA	cDNA sequence BC024806
H3009B02	-0.416575	-15.4566	0.000588328	0.0304582	Mm.224452	AA536749	NA	BC039932.1	expressed sequence AA536749
H3148H03	-0.27595	-15.4361	0.000590656	0.0304582	Mm.249589	Xpo4	NM_020506.1	NA	exportin 4
H3150D11	-2.924	-15.4172	0.000592815	0.0304582	Mm.234247	Ddah1	NM_026993.1	NA	dimethylarginine dimethylaminohydrolase 1
H3012D09	-1.35458	-15.3689	0.000598358	0.0304582	Mm.29898	2410015N17Rik	NM_023203.1	NA	RIKEN cDNA 2410015N17 gene
H3052H05	-0.1676	-15.3052	0.000605781	0.0304582	Mm.275841	AW743433	NM_172649.1	NA	expressed sequence AW743433
H3007E12	-1.83123	-15.2403	0.000613483	0.0304582	NA	NA	NA	NA	EST
H3141B09	-1.41318	-15.1635	0.000622753	0.0304582	Mm.291032	C330027G06Rik	NM_138593.1	NA	RIKEN cDNA C330027G06 gene
H3101G05	-0.8296	-15.1469	0.000624777	0.0304582	Mm.279692	Dnaja2	NM_019794.1	NA	DnaJ (Hsp40) homolog, subfamily A, member 2
P749	-0.93865	-15.1197	0.000628118	0.0304582	Mm.292547	Ptgs2	NM_011198.2	NA	prostaglandin-endoperoxide synthase 2
H3013C12	-1.36767	-15.0821	0.000632777	0.0304582	Mm.206841	Smc4l1	NM_133786.3	NA	SMC4 structural maintenance of chromosomes 4-like 1 (yeast)
H3019G03	-0.819325	-15.0523	0.000636503	0.0304582	Mm.28689	Tbrg1	NA	BC037145.1	transforming growth factor beta regulated gene 1
H3029B07	-0.666125	-14.9843	0.000645123	0.0304582	Mm.283165	2410005K20Rik	NM_025546.1	NA	RIKEN cDNA 2410005K20 gene
H3114A01	-1.59745	-14.9679	0.000647221	0.0304582	Mm.41562	2610002K22Rik	NA	BC039655.1	RIKEN cDNA 2610002K22 gene
H3154D12	-1.2158	-14.9356	0.00065139	0.0304802	Mm.290595	Zfp105	NM_009544.1	NA	zinc finger protein 105
H3014F12	-0.909925	-14.8428	0.000663543	0.0305148	Mm.3676	2310061A22Rik	NM_025872.2	NA	RIKEN cDNA 2310061A22 gene
H3037G04	-0.994625	-14.8245	0.000665979	0.0305148	Mm.286602	Cdc25c	NM_009860.1	NA	cell division cycle 25 homolog C (S. cerevisiae)
H3008G05	-1.13585	-14.8104	0.000667868	0.0305148	Mm.214504	Timm8a	NM_013898.1	NA	translocase of inner mitochondrial membrane 8 homolog a (yeast)
H3005E03	-0.792775	-14.8063	0.00066841	0.0305148	NA	NA	NA	NA	EST
H3104A05	-1.10702	-14.8043	0.000668684	0.0305148	Mm.279400	Gprk5	NM_018869.2	NA	G protein-coupled receptor kinase 5
H3029C01	-2.03375	-14.7594	0.000674737	0.0305148	Mm.291226	NA	NA	AK084363.1	Mus musculus 12 days embryo eyeball cDNA, RIKEN full-length enriched library, clone:D230032A16 product:unknown EST, full insert sequence
H3159G03	-1.40023	-14.7436	0.000676885	0.0305148	Mm.124316	Tfpi	NM_011576.1	NA	tissue factor pathway inhibitor
H3092G09	-1.28737	-14.7277	0.000679059	0.0305148	NA	NA	NA	NA	EST
H3017B12	-1.47752	-14.7214	0.000679918	0.0305148	Mm.249333	1300002F13Rik	NM_133753.1	NA	RIKEN cDNA 1300002F13 gene
H3069F12	-1.09438	-14.6975	0.000683198	0.0305787	Mm.12616	Dnajc3	NM_008929.2	NA	DnaJ (Hsp40) homolog, subfamily C, member 3
T365	-2.58752	-14.6764	0.000686125	0.0306264	Mm.214554	Grb14	NM_016719.1	NA	growth factor receptor bound protein 14
P940	-0.81395	-14.6297	0.000692642	0.0306498	Mm.204820	Mmp16	NM_019724.2	NA	matrix metalloproteinase 16
H3087D06	-0.5555	-14.6194	0.000694092	0.0306498	Mm.3845	Etf1	NM_144866.2	NA	eukaryotic translation termination factor 1
H3105A05	-1.1462	-14.5836	0.00069915	0.0306736	Mm.271854	Lrp1	NM_008512.1	NA	low density lipoprotein receptor-related protein 1
H3093F06	-0.48025	-14.5734	0.000700605	0.0306736	Mm.25594	Prkar2b	NA	AK081805.1	protein kinase, cAMP dependent regulatory, type II beta
H3037E10	-0.66835	-14.5584	0.000702758	0.0306736	Mm.268027	2900064A13Rik	NM_133749.1	NA	RIKEN cDNA 2900064A13 gene
H3121H04	-0.5737	-14.5501	0.000703942	0.0306736	Mm.28659	Pes1	NM_022889.2	NA	pescadillo homolog 1, containing BRCT domain (zebrafish)
H3020E11	-1.2805	-14.4227	0.000722553	0.0312367	Mm.77695	Ccnf	NM_007634.2	NA	cyclin F
H3047H07	-0.269225	-14.3841	0.000728318	0.0312818	NA	NA	NA	NA	EST
H3061E04	-1.75432	-14.201	0.000756516	0.0319555	Mm.241056	Cdo1	NM_033037.2	NA	cysteine dioxygenase 1, cytosolic
T381	-1.97857	-14.1486	0.00076484	0.0319555	Mm.1231	Cyr61	NM_010516.1	NA	cysteine rich protein 61
H3014A08	-0.61205	-14.1393	0.000766343	0.0319555	Mm.188544	Rpn1	NM_133933.2	NA	ribophorin I
H3083D02	-1.02487	-14.058	0.000779557	0.0323428	Mm.4189	Ccna2	NM_009828.1	NA	cyclin A2
H3080E09	-0.7264	-13.9802	0.000792474	0.032661	Mm.101578	AW557704	NM_172456.1	NA	expressed sequence AW557704
H3093B09	-1.43948	-13.9702	0.000794156	0.032661	Mm.71015	2700053F16Rik	NM_028295.1	NA	RIKEN cDNA 2700053F16 gene
H3028G10	-1.19755	-13.9306	0.000800872	0.0327324	Mm.29906	Ebna1bp2	NM_026932.2	NA	EBNA1 binding protein 2
H3090B06	-0.6069	-13.8906	0.000807718	0.0327683	Mm.295189	NA	NA	BY261253.1	Mus musculus similar to hypothetical protein FLJ32499 (LOC327951), mRNA
H3148A05	-0.429325	-13.7956	0.000824312	0.0330347	Mm.6522	Cmkor1	NM_007722.2	NA	chemokine orphan receptor 1
H3101D10	-0.72325	-13.7693	0.000828987	0.0330751	Mm.290166	Mrpl18	NM_026310.1	NA	mitochondrial ribosomal protein L18
H3157A04	-0.91775	-13.7667	0.000829463	0.0330751	NA	NA	NA	NA	EST
H3039G04	-0.319475	-13.7536	0.000831803	0.0330751	Mm.28688	Sars1	NM_011319.1	NA	seryl-aminoacyl-tRNA synthetase 1
H3104E02	-1.01675	-13.6196	0.000856266	0.0330751	Mm.31607	AI447711	NA	AK050842.1	expressed sequence AI447711
H3023C01	-0.541375	-13.5937	0.000861115	0.0330751	Mm.25937	2700033G17Rik	NM_178392.2	NA	RIKEN cDNA 2700033G17 gene
H3014D12	-0.723575	-13.5885	0.000862099	0.0330751	Mm.40802	2810480G15Rik	NM_133925.1	NA	Riken cDNA 2810480G15 gene
H3011A10	-1.3046	-13.5878	0.000862218	0.0330751	Mm.24627	4833432B22Rik	NM_133874.1	NA	RIKEN cDNA 4833432B22 gene
H3052F08	-1.01205	-13.5821	0.000863287	0.0330751	Mm.284491	3200002M19Rik	NM_027532.1	NA	RIKEN cDNA 3200002M19 gene
H3034D08	-0.915225	-13.5762	0.000864413	0.0330751	Mm.245357	G630041M05Rik	NM_144530.1	NA	RIKEN cDNA G630041M05 gene
H3024A12	-1.78137	-13.5704	0.000865504	0.0330751	Mm.30927	3300001P08Rik	NM_026313.1	NA	RIKEN cDNA 3300001P08 gene
H3142A01	-0.251	-13.5566	0.000868116	0.0330751	Mm.186943	D1Bwg0491e	NM_018872.1	NA	DNA segment, Chr 1, Brigham & Women's Genetics 0491 expressed
H3097C04	-0.57775	-13.5542	0.000868562	0.0330751	Mm.22718	Xbp1	NM_013842.2	NA	X-box binding protein 1
H3001A11	-0.93675	-13.5266	0.00087382	0.0330751	Mm.40282	Gphn	NM_172952.1	NA	gephyrin
H3061D06	-2.11422	-13.5202	0.000875051	0.0330751	Mm.27365	Fath	NA	BC036134.1	fat tumor suppressor homolog (Drosophila)
H3010F06	-1.4237	-13.5177	0.000875522	0.0330751	Mm.317374	NA	NA	AW538782.2	Mus musculus transcribed sequences
H3056E10	-1.05625	-13.5002	0.000878892	0.0331264	Mm.190774	5031434M05Rik	NM_172870.1	NA	RIKEN cDNA 5031434M05 gene
H3024B04	-0.4524	-13.4405	0.000890508	0.0332502	Mm.256034	Cct3	NM_009836.1	NA	chaperonin subunit 3 (gamma)
P949	-2.26322	-13.4391	0.000890771	0.0332502	Mm.103593	Dkk2	NM_020265.2	NA	dickkopf homolog 2 (Xenopus laevis)
H3150H11	-1.16742	-13.3545	0.000907596	0.0335193	Mm.200422	NA	NA	AK080297.1	Mus musculus 3 days neonate thymus cDNA, RIKEN full-length enriched library, clone:A630040D01 product:unknown EST, full insert sequence
H3113G02	-1.18755	-13.3452	0.000909471	0.0335193	Mm.218	Mns1	NM_008613.1	NA	meiosis-specific nuclear structural protein 1
H3122E03	-1.28363	-13.3442	0.000909668	0.0335193	Mm.28919	Dstn	NM_019771.1	NA	destrin
P191	-1.29245	-13.2748	0.00092382	0.0335288	Mm.276000	Nfatc3	NA	BC049877.1	nuclear factor of activated T-cells, cytoplasmic 3
N807	-1.78573	-13.2542	0.000928072	0.0335288	Mm.166318	Cktsf1b1	NM_011824.1	NA	cysteine knot superfamily 1, BMP antagonist 1
H3026B04	-0.71175	-13.2526	0.000928409	0.0335288	Mm.202337	Ppat	NM_172146.1	NA	phosphoribosyl pyrophosphate amidotransferase
H3055E06	-0.97685	-13.248	0.000929351	0.0335288	Mm.29200	2310006I24Rik	NA	CA752008.1	RIKEN cDNA 2310006I24 gene
P593	-1.1389	-13.2361	0.000931826	0.0335288	Mm.294136	Ccnd2	NM_009829.2	NA	cyclin D2
H3158C12	-1.9442	-13.236	0.000931853	0.0335288	Mm.168523	Calmbp1	NM_009791.2	NA	calmodulin binding protein 1
H3118C07	-0.54605	-13.1778	0.000944092	0.0337248	Mm.1777	Hspd1	NM_010477.2	NA	heat shock protein 1 (chaperonin)
H3059A05	-1.4183	-13.1636	0.000947096	0.0337248	Mm.290830	Mad2l1	NM_019499.2	NA	MAD2 (mitotic arrest deficient, homolog)-like 1 (yeast)
H3077E12	-0.896425	-13.1594	0.000948005	0.0337248	Mm.257590	2810406C15Rik	NM_146171.1	NA	RIKEN cDNA 2810406C15 gene
H3076D01	-0.8497	-13.108	0.000959032	0.0338473	Mm.264266	3110023B02Rik	NM_152807.1	NA	RIKEN cDNA 3110023B02 gene
P285	-1.13725	-13.1047	0.000959746	0.0338473	Mm.281367	Cdc2a	NM_007659.2	NA	cell division cycle 2 homolog A (S. pombe)
H3068A08	-1.51693	-13.0634	0.000968764	0.0340224	Mm.259374	Kif23	NM_024245.3	NA	kinesin family member 23
H3072G01	-1.93685	-13.0069	0.000981258	0.0340371	Mm.274086	Kif18a	NM_139303.1	NA	kinesin family member 18A
H3029G04	-1.07215	-12.9868	0.000985749	0.0340371	Mm.279985	Gemin6	NM_026053.1	NA	gem (nuclear organelle) associated protein 6
H3105B10	-0.9687	-12.9793	0.000987443	0.0340371	Mm.260114	Ccnb1	NM_172301.2	NA	cyclin B1
H3129H08	-0.574325	-12.9736	0.000988719	0.0340371	Mm.4848	Fyn	NM_008054.1	NA	Fyn proto-oncogene
H3084C08	-0.87545	-12.9538	0.000993211	0.0340371	Mm.10160	Cggbp1	NM_178647.2	NA	CGG triplet repeat binding protein 1
H3132F09	-1.09777	-12.9524	0.000993516	0.0340371	Mm.286488	Kif22	NM_145588.1	NA	kinesin family member 22
H3028A11	-1.64055	-12.9504	0.00099398	0.0340371	Mm.2999	Smc2l1	NM_008017.2	NA	SMC2 structural maintenance of chromosomes 2-like 1 (yeast)
H3029C02	-0.90085	-12.9287	0.000998932	0.0341357	Mm.279228	Gdap2	NM_010269.1	NA	ganglioside-induced differentiation-associated-protein 2
H3047G08	-1.60105	-12.9168	0.00100165	0.0341576	Mm.272878	Crebbp	NA	AK051071.1	CREB binding protein
H3122A08	-0.69795	-12.8689	0.00101271	0.0343924	Mm.23503	6720463M24Rik	NM_175265.2	NA	RIKEN cDNA 6720463M24 gene
H3035E03	-1.23552	-12.8422	0.00101894	0.0344956	Mm.6419	BC004044	NM_030565.5	NA	cDNA sequence BC004044
H3034G06	-0.6258	-12.8291	0.00102203	0.0344956	Mm.255044	Pank3	NM_145962.1	NA	pantothenate kinase 3
H3024C11	-1.5079	-12.7783	0.00103409	0.0345659	Mm.296383	Hspca	NA	BC037151.1	heat shock protein 1, alpha
H3031E04	-0.792325	-12.7324	0.00104515	0.0348476	Mm.135581	Rpo1-4	NM_009088.2	NA	RNA polymerase 1-4
H3039E11	-0.479825	-12.6355	0.00106901	0.0354009	Mm.5697	NA	NA	AK086861.1	Mus musculus 0 day neonate lung cDNA, RIKEN full-length enriched library, clone:E030006G18 product:unknown EST, full insert sequence
H3029D01	-2.15322	-12.6216	0.00107249	0.0354009	Mm.4580	Slc4a2	NM_009207.1	NA	solute carrier family 4 (anion exchanger), member 2
H3010H12	-0.34895	-12.5952	0.00107916	0.0354789	Mm.271715	Phf5a	NM_026737.1	NA	PHD finger protein 5A
H3153H08	-1.86108	-12.5735	0.00108468	0.0355185	Mm.252561	Hs6st2	NM_015819.1	NA	heparan sulfate 6-O-sulfotransferase 2
H3019D07	-1.02642	-12.5617	0.00108768	0.0355276	Mm.233889	2900042E17Rik	NM_172653.2	NA	RIKEN cDNA 2900042E17 gene
H3016E08	-0.5646	-12.51	0.00110101	0.0356591	Mm.290580	Gse1	NA	L27155.1	genetic suppressor element 1
H3146B04	-0.43235	-12.4758	0.00110997	0.0356591	Mm.4538	Lbr	NM_133815.1	NA	lamin B receptor
H3025A03	-0.632875	-12.4645	0.00111294	0.0356591	Mm.291059	Orc4l	NM_011958.2	NA	origin recognition complex, subunit 4-like (S. cerevisiae)
H3064C04	-1.48998	-12.4435	0.0011185	0.0356591	Mm.259374	Kif23	NM_024245.3	NA	kinesin family member 23
T435	-2.03927	-12.4255	0.0011233	0.0356591	Mm.57177	Fgf7	NM_008008.3	NA	fibroblast growth factor 7
H3085E04	-1.60947	-12.4121	0.00112689	0.0356846	Mm.35492	2600013N14Rik	NM_152812.1	NA	RIKEN cDNA 2600013N14 gene
H3050E04	-0.5195	-12.4	0.00113012	0.0356846	Mm.279371	Cdc25a	NM_007658.1	NA	cell division cycle 25 homolog A (S. cerevisiae)
H3117E03	-0.698675	-12.3199	0.00115197	0.0359164	Mm.290251	Cnbp	NM_013493.1	NA	cellular nucleic acid binding protein
H3122E02	-0.6094	-12.2891	0.00116053	0.0359164	Mm.275688	4930487N19Rik	NA	AK044235.1	RIKEN cDNA 4930487N19 gene
H3017H08	-0.88945	-12.2757	0.00116428	0.0359164	Mm.282888	2410046H15Rik	NM_026119.2	NA	RIKEN cDNA 2410046H15 gene
H3015D07	-0.622825	-12.2299	0.00117719	0.0359498	Mm.193102	NA	NA	AK078889.1	Mus musculus adult male colon cDNA, RIKEN full-length enriched library, clone:9030621G03 product:unknown EST, full insert sequence
H3007A01	-0.52	-12.2256	0.0011784	0.0359498	Mm.259589	D030063F01Rik	NM_177122.2	NA	RIKEN cDNA D030063F01 gene
H3053E01	-1.57127	-12.1999	0.00118577	0.0359498	Mm.34557	B130024B19Rik	NM_172508.2	NA	RIKEN cDNA B130024B19 gene
P568	-0.418525	-12.1966	0.00118669	0.0359498	Mm.279361	Vcl	NM_009502.3	NA	vinculin
H3081D11	-0.4381	-12.1963	0.00118679	0.0359498	Mm.268172	4930535B03Rik	NM_028328.1	NA	RIKEN cDNA 4930535B03 gene
H3118H11	-0.6982	-12.1481	0.00120076	0.0359498	Mm.21764	Snrpg	NM_026506.1	NA	small nuclear ribonucleoprotein polypeptide G
H3088G10	-0.637625	-12.1459	0.0012014	0.0359498	Mm.246424	BC043118	NM_174848.2	NA	cDNA sequence BC043118
P096	-1.3893	-12.127	0.00120692	0.0359498	Mm.289841	2810430M08Rik	NM_026041.1	NA	RIKEN cDNA 2810430M08 gene
H3073F08	-0.949675	-12.1016	0.00121442	0.0359498	Mm.268708	L3mbtl3	NM_172787.1	NA	l(3)mbt-like 3 (Drosophila)
H3031D02	-0.324925	-12.0825	0.00122008	0.0359498	Mm.169673	AI642036	NA	AK049782.1	expressed sequence AI642036
H3066C06	-0.65245	-11.9953	0.00124644	0.0360915	Mm.277094	Sfpq	NM_023603.1	NA	splicing factor proline/glutamine rich (polypyrimidine tract binding protein associated)
H3121C04	-0.4665	-11.9835	0.0012501	0.0360967	Mm.21848	Bzw1	NM_025824.2	NA	basic leucine zipper and W2 domains 1
T174	-1.12213	-11.9506	0.00126026	0.0360967	Mm.277916	Ptpn1	NM_011201.1	NA	protein tyrosine phosphatase, non-receptor type 1
H3119C06	-1.0445	-11.9453	0.00126191	0.0360967	Mm.220367	Nol5	NM_018868.1	NA	nucleolar protein 5
H3029B02	-0.594675	-11.93	0.0012667	0.0360967	Mm.256034	Cct3	NM_009836.1	NA	chaperonin subunit 3 (gamma)
H3081H08	-0.4808	-11.8813	0.00128207	0.0361675	Mm.258462	5730591C18Rik	NM_026572.1	NA	RIKEN cDNA 5730591C18 gene
H3104C07	-1.78283	-11.8804	0.00128235	0.0361675	Mm.27856	Ptprk	NM_008983.1	NA	protein tyrosine phosphatase, receptor type, K
H3018D11	-1.661	-11.8802	0.00128242	0.0361675	Mm.257474	Fnbp3	NM_018785.1	NA	formin binding protein 3
H3017C11	-1.332	-11.8683	0.00128621	0.0361675	Mm.143774	2400006H24Rik	NM_021329.1	NA	RIKEN cDNA 2400006H24 gene
H3076A05	-0.526725	-11.8666	0.00128675	0.0361675	Mm.272217	NA	NA	AU019114.1	Mus musculus transcribed sequences
H3137D07	-0.72175	-11.8095	0.00130519	0.0362775	Mm.5831	Abce1	NM_015751.1	NA	ATP-binding cassette, sub-family E (OABP), member 1
H3012G05	-0.655475	-11.8052	0.00130661	0.0362775	Mm.157758	D13Wsu177e	NM_178605.2	NA	DNA segment, Chr 13, Wayne State University 177, expressed
H3127E12	-1.41	-11.8039	0.00130703	0.0362775	Mm.236835	Fez2	NA	AK033547.1	fasciculation and elongation protein zeta 2 (zygin II)
H3079A09	-1.27297	-11.801	0.00130799	0.0362775	Mm.4189	Ccna2	NM_009828.1	NA	cyclin A2
H3025C08	-0.39435	-11.7958	0.00130967	0.0362775	Mm.29760	Psmd13	NM_011875.2	NA	proteasome (prosome, macropain) 26S subunit, non-ATPase, 13
H3032C01	-0.73225	-11.7866	0.0013127	0.0362775	Mm.35389	NA	NA	BY369040.1	Mus musculus transcribed sequences
H3105D04	-0.472625	-11.769	0.0013185	0.0362941	Mm.24202	AW108046	NM_019757.1	NA	expressed sequence AW108046
H3092D05	-1.29868	-11.752	0.00132414	0.0362941	Mm.169263	1700027M01Rik	NM_023544.2	NA	RIKEN cDNA 1700027M01 gene
H3020H12	-1.1771	-11.6743	0.00135029	0.0364502	Mm.323404	NA	NA	CB194981.1	Mus musculus transcribed sequences
H3080B02	-0.8157	-11.6709	0.00135145	0.0364502	Mm.10987	Limd1	NM_013860.1	NA	LIM domains containing 1
H3007A07	-1.28757	-11.6617	0.00135457	0.0364502	Mm.1514	Lpl	NM_008509.1	NA	lipoprotein lipase
H3114E02	-0.5413	-11.6546	0.00135703	0.0364502	Mm.18347	Psmd7	NM_010817.1	NA	proteasome (prosome, macropain) 26S subunit, non-ATPase, 7
H3014G02	-1.11823	-11.6443	0.00136057	0.0364502	Mm.273188	F3	NM_010171.2	NA	coagulation factor III
H3110H05	-1.23127	-11.6431	0.00136099	0.0364502	Mm.22284	1110023P21Rik	NM_025390.2	NA	RIKEN cDNA 1110023P21 gene
H3045A07	-0.93155	-11.6045	0.00137436	0.0367004	Mm.258310	D930024E11	NM_177775.2	NA	hypothetical protein D930024E11
H3121E03	-0.8358	-11.6033	0.00137479	0.0367004	Mm.35296	NA	NA	AK078720.1	Mus musculus adult male eyeball cDNA, RIKEN full-length enriched library, clone:7530422H18 product:unclassifiable, full insert sequence
H3077F05	-1.48165	-11.5685	0.001387	0.0369067	Mm.29054	2610529I12Rik	NM_145706.1	NA	RIKEN cDNA 2610529I12 gene
H3030D07	-0.619025	-11.4725	0.00142147	0.0375209	NA	NA	NA	NA	EST
H3038E10	-0.9724	-11.4623	0.00142523	0.0375285	Mm.5662	Coq3	NM_172687.1	NA	coenzyme Q3 homolog, methyltransferase (yeast)
H3112D06	-0.41355	-11.4482	0.00143041	0.0375285	Mm.180338	2610027L16Rik	NM_026403.2	NA	RIKEN cDNA 2610027L16 gene
H3123E02	-0.79385	-11.4346	0.00143543	0.0375285	Mm.290251	Cnbp	NM_013493.1	NA	cellular nucleic acid binding protein
H3107H01	-2.08688	-11.4204	0.00144069	0.0375635	Mm.28770	Jam3	NM_023277.1	NA	junction adhesion molecule 3
H3052B06	-1.60345	-11.4064	0.00144589	0.0375635	Mm.146649	Abcb1b	NM_011075.1	NA	ATP-binding cassette, sub-family B (MDR/TAP), member 1B
H3026G07	-0.665625	-11.3993	0.00144854	0.037573	Mm.28940	Bbx	NM_027444.1	NA	bobby sox homolog (Drosophila)
H3013C02	-0.91345	-11.3695	0.00145976	0.0377637	Mm.234464	Dnd1	NM_173383.1	NA	dead end homolog 1 (zebrafish)
H3121F02	-0.9507	-11.365	0.00146145	0.0377637	Mm.269083	5730409G07Rik	NA	BC048575.1	RIKEN cDNA 5730409G07 gene
H3010G09	-0.482125	-11.2924	0.0014893	0.0380432	Mm.123110	Spnb2	NM_009260.1	NA	spectrin beta 2
H3098F12	-0.361975	-11.2853	0.00149209	0.0380432	Mm.288460	MGC7717	NM_146022.1	NA	hypothetical protein MGC7717
T120	-1.05615	-11.2547	0.00150403	0.0380432	Mm.271854	Lrp1	NM_008512.1	NA	low density lipoprotein receptor-related protein 1
H3087A06	-1.42785	-11.2545	0.00150411	0.0380432	Mm.276081	Falz	NA	BC003956.1	fetal Alzheimer antigen
H3033F06	-0.60245	-11.254	0.00150434	0.0380432	Mm.21135	Dicer1	NM_148948.1	NA	Dicer1, Dcr-1 homolog (Drosophila)
H3031F08	-0.865125	-11.2478	0.00150676	0.0380432	Mm.282092	Dnajb1	NM_018808.1	NA	DnaJ (Hsp40) homolog, subfamily B, member 1
H3042H09	-0.628825	-11.2422	0.00150896	0.0380432	Mm.246237	5730589K01Rik	NM_023434.1	NA	RIKEN cDNA 5730589K01 gene
H3038G10	-0.0922	-11.2225	0.00151679	0.0380432	Mm.259359	NA	NA	C78006.1	Mus musculus transcribed sequences
H3008B12	-1.1542	-11.2208	0.00151748	0.0380432	Mm.249558	Flnb	NA	BC023873.1	filamin, beta
H3034B05	-0.35195	-11.2033	0.00152444	0.0380439	Mm.174695	D4Ertd22e	NM_174996.1	NA	DNA segment, Chr 4, ERATO Doi 22, expressed
H3136H11	-0.9672	-11.1785	0.00153445	0.0382358	Mm.321048	Map4k5	NA	AK084986.1	mitogen-activated protein kinase kinase kinase kinase 5
H3015H09	-1.04155	-11.1581	0.00154268	0.0382505	Mm.284605	Srr	NM_013761.2	NA	serine racemase
H3032B05	-0.50645	-11.1517	0.0015453	0.0382505	Mm.289992	Eif3s6	NA	AK088269.1	eukaryotic translation initiation factor 3, subunit 6
H3016A02	-0.2467	-11.1484	0.00154666	0.0382505	Mm.368	Psmb4	NA	BY007496.1	proteasome (prosome, macropain) subunit, beta type 4
H3144C12	-1.5901	-11.1368	0.00155141	0.0382505	Mm.295801	NA	NA	AK010555.1	Mus musculus similar to hypothetical protein FLJ20729 (LOC229937), mRNA
H3084F05	-0.6001	-11.1343	0.00155244	0.0382505	Mm.160061	Fancd2	NA	BC040776.1	Fanconi anemia, complementation group D2
H3099D05	-0.938	-11.1006	0.00156636	0.0384494	NA	NA	NA	NA	EST
H3092D11	-1.38882	-11.0807	0.00157463	0.038481	Mm.292041	Aven	NM_028844.1	NA	apoptosis, caspase activation inhibitor
H3078H02	-0.504925	-11.0757	0.00157672	0.038481	Mm.266312	Zrf2	NM_009583.1	NA	zuotin related factor 2
H3119H05	-0.61995	-11.0751	0.00157699	0.038481	Mm.233891	Mafb	NA	CA566886.1	v-maf musculoaponeurotic fibrosarcoma oncogene family, protein B (avian)
H3071C08	-0.561575	-11.0631	0.00158202	0.038516	Mm.291828	1810057B09Rik	NM_175009.2	NA	RIKEN cDNA 1810057B09 gene
H3133F07	-0.649425	-11.0306	0.00159576	0.038516	Mm.229287	B130017I01Rik	NM_172525.1	NA	RIKEN cDNA B130017I01 gene
H3024B02	-0.3739	-11.0161	0.00160194	0.038516	Mm.28375	Sec61a1	NM_016906.2	NA	Sec61 alpha 1 subunit (S. cerevisiae)
H3149C01	-1.24667	-11.0057	0.00160643	0.038516	NA	NA	NA	NA	EST
H3027H02	-0.3311	-11	0.00160887	0.038516	Mm.218423	2010110K24Rik	NM_025934.1	NA	RIKEN cDNA 2010110K24 gene
H3030B04	-0.449425	-10.9953	0.00161088	0.038516	Mm.284688	1300011P19Rik	NM_026130.1	NA	RIKEN cDNA 1300011P19 gene
P116	-1.07668	-10.9871	0.00161444	0.038516	Mm.222260	Cd44	NA	AK087472.1	CD44 antigen
H3028E07	-0.6579	-10.972	0.00162096	0.038516	Mm.84294	3110082I17Rik	NM_028469.1	NA	RIKEN cDNA 3110082I17 gene
H3011F08	-1.45142	-10.9534	0.0016291	0.0385706	Mm.249333	1300002F13Rik	NM_133753.1	NA	RIKEN cDNA 1300002F13 gene
H3006C09	-0.73955	-10.9431	0.00163358	0.0385706	Mm.217547	Xpo1	NM_134014.2	NA	exportin 1, CRM1 homolog (yeast)
H3010C12	-0.491725	-10.941	0.00163452	0.0385706	Mm.206642	Mgat2	NM_146035.1	NA	mannoside acetylglucosaminyltransferase 2
H3115F11	-1.77828	-10.9259	0.00164116	0.0386164	Mm.20348	Nid2	NM_008695.1	NA	nidogen 2
H3008A03	-1.1365	-10.9104	0.00164803	0.0386221	Mm.4481	Il17r	NM_008359.1	NA	interleukin 17 receptor
H3020F11	-0.84775	-10.8935	0.00165559	0.0386745	Mm.41271	Stard7	NM_139308.1	NA	START domain containing 7
H3100C04	-1.2712	-10.8922	0.00165613	0.0386745	Mm.173438	Ipo7	NM_181517.1	NA	importin 7
P668	-1.51707	-10.8749	0.0016639	0.0386745	Mm.166318	Cktsf1b1	NM_011824.1	NA	cysteine knot superfamily 1, BMP antagonist 1
H3027B01	-1.30692	-10.8649	0.00166843	0.0386745	Mm.16525	Plk	NM_011121.2	NA	polo-like kinase (Drosophila)
H3074A05	-0.908925	-10.8617	0.00166985	0.0386745	Mm.227274	Prc1	NM_145150.1	NA	protein regulator of cytokinesis 1
H3158H03	-0.888825	-10.8508	0.00167481	0.0386745	Mm.213292	D16Wsu109e	NM_138599.2	NA	DNA segment, Chr 16, Wayne State University 109, expressed
H3010B12	-1.31242	-10.8501	0.00167512	0.0386745	Mm.31246	Trip13	NA	BC023834.1	thyroid hormone receptor interactor 13
P344	-1.88882	-10.8414	0.00167906	0.0386745	Mm.4177	Ucp1	NM_009463.2	NA	uncoupling protein 1, mitochondrial
P571	-2.0399	-10.834	0.00168244	0.0386745	Mm.196728	Abcg2	NM_011920.1	NA	ATP-binding cassette, sub-family G (WHITE), member 2
H3082E04	-1.70345	-10.8303	0.00168414	0.0386745	Mm.18509	Ptger4	NM_008965.1	NA	prostaglandin E receptor 4 (subtype EP4)
H3127A12	-0.514425	-10.8301	0.00168425	0.0386745	Mm.270186	Rbbp7	NM_009031.2	NA	retinoblastoma binding protein 7
H3032A10	-1.2609	-10.8208	0.0016885	0.0386745	Mm.36291	C030036P15Rik	NM_172757.2	NA	RIKEN cDNA C030036P15 gene
H3019H01	-0.700425	-10.8127	0.00169221	0.0386745	Mm.132226	2210022F10Rik	NM_133838.2	NA	RIKEN cDNA 2210022F10 gene
H3090B07	-1.0017	-10.806	0.00169528	0.0386745	Mm.295212	NA	NA	BY362001.1	Mus musculus transcribed sequences
P669	-2.60588	-10.7656	0.00171407	0.0389951	Mm.25760	Prdc	NM_011825.1	NA	protein related to DAN and cerberus
H3028C05	-1.1403	-10.7595	0.00171693	0.0390063	Mm.188851	Pdap1	NA	BC055927.1	PDGFA associated protein 1
T366	-0.821	-10.7387	0.00172671	0.0390221	Mm.273117	Grb10	NM_010345.1	NA	growth factor receptor bound protein 10
H3007E03	-1.38183	-10.7365	0.00172777	0.0390221	Mm.28371	Tex261	NM_009357.1	NA	testis expressed gene 261
P531	-1.5174	-10.7347	0.00172859	0.0390221	Mm.257437	Cdh2	NM_007664.1	NA	cadherin 2
H3028G11	-0.588425	-10.7269	0.0017323	0.0390221	Mm.286285	Jade1	NM_172303.3	NA	Jade1 PHD finger protein
H3005D10	-0.76235	-10.7229	0.00173421	0.0390221	Mm.134093	Sema3e	NM_183303.1	NA	sema domain, immunoglobulin domain (Ig), short basic domain, secreted, (semaphorin) 3E
H3081G12	-0.5458	-10.6933	0.00174837	0.0392149	Mm.29960	AI326906	NM_153570.2	NA	expressed sequence AI326906
H3141G07	-0.4336	-10.6892	0.00175031	0.0392149	Mm.277094	Sfpq	NM_023603.1	NA	splicing factor proline/glutamine rich (polypyrimidine tract binding protein associated)
H3031A04	-0.502875	-10.6739	0.00175769	0.039282	Mm.64104	2410016F19Rik	NM_026113.2	NA	RIKEN cDNA 2410016F19 gene
H3102B10	-0.802625	-10.6645	0.00176225	0.0392979	Mm.24425	1300019C06Rik	NM_025832.2	NA	RIKEN cDNA 1300019C06 gene
H3150A09	-1.12617	-10.6626	0.00176317	0.0392979	Mm.179091	1500031K13Rik	NM_026908.2	NA	RIKEN cDNA 1500031K13 gene
H3046D08	-0.881375	-10.6317	0.00177827	0.0393256	Mm.240490	1200009K13Rik	NM_025814.1	NA	RIKEN cDNA 1200009K13 gene
H3029E01	-1.08603	-10.6019	0.001793	0.0393256	Mm.295392	Scamp2	NM_022813.2	NA	secretory carrier membrane protein 2
H3062A04	-0.778675	-10.5985	0.00179468	0.0393256	Mm.31486	Rab32	NM_026405.2	NA	RAB32, member RAS oncogene family
T113	-1.11205	-10.5871	0.00180036	0.0393256	Mm.26743	Apoa1	NM_009692.1	NA	apolipoprotein A-I
H3026F04	-0.7752	-10.5818	0.00180305	0.0393256	Mm.150903	Prkwnk1	NM_198703.1	NA	protein kinase, lysine deficient 1
H3001D01	-1.20145	-10.5763	0.00180578	0.0393256	Mm.156452	4432404J10Rik	NM_025709.2	NA	RIKEN cDNA 4432404J10 gene
H3044B01	-0.48745	-10.5752	0.00180635	0.0393256	Mm.296985	Cct4	NM_009837.1	NA	chaperonin subunit 4 (delta)
H3019C10	-0.6793	-10.564	0.00181195	0.0393256	Mm.263862	Phb	NM_008831.2	NA	prohibitin
H3045C08	-0.782225	-10.5636	0.00181216	0.0393256	Mm.172867	NA	NA	C79845.1	Mus musculus transcribed sequences
H3158B08	-0.3933	-10.5325	0.00182795	0.0396079	Mm.31175	Prkab2	NM_182997.1	NA	protein kinase, AMP-activated, beta 2 non-catalytic subunit
P844	-0.851125	-10.5115	0.00183865	0.0396473	Mm.7214	Anxa3	NM_013470.1	NA	annexin A3
H3101D02	-0.69675	-10.5086	0.00184018	0.0396473	Mm.22108	1700029A22Rik	NA	BY011850.1	RIKEN cDNA 1700029A22 gene
H3078H08	-1.2031	-10.5039	0.0018426	0.0396473	Mm.200422	NA	NA	AK080297.1	Mus musculus 3 days neonate thymus cDNA, RIKEN full-length enriched library, clone:A630040D01 product:unknown EST, full insert sequence
H3017A11	-0.700875	-10.5015	0.00184384	0.0396473	Mm.310713	NA	NA	BC049878.1	Mus musculus ES cells cDNA, RIKEN full-length enriched library, clone:2410074K14 product:expressed sequence AW146353, full insert sequence
H3128G04	-0.82135	-10.4772	0.00185641	0.0397618	Mm.9745	Ldh2	NM_008492.2	NA	lactate dehydrogenase 2, B chain
H3091A06	-1.1345	-10.4439	0.00187386	0.040008	Mm.263355	4432417F03Rik	NM_027547.1	NA	RIKEN cDNA 4432417F03 gene
H3064E06	-0.76595	-10.4392	0.00187629	0.040008	Mm.269418	MGC66590	NA	AK051519.1	Unknown (protein for MGC:66590)
H3029H07	-0.5244	-10.4291	0.00188167	0.040008	Mm.30059	Marcks	NM_008538.1	NA	myristoylated alanine rich protein kinase C substrate
H3002A04	-0.61565	-10.4259	0.00188337	0.040008	NA	NA	NA	NA	EST
H3060E09	-0.83855	-10.4176	0.00188777	0.040008	Mm.281714	Kdel1	NM_023645.2	NA	KDEL containing protein 1
H3122H03	-0.4189	-10.3868	0.00190423	0.0402625	Mm.28124	Gfer	NM_023040.1	NA	growth factor, erv1 (S. cerevisiae)-like (augmenter of liver regeneration)
H3026A11	-1.4201	-10.3807	0.00190751	0.0402804	Mm.29164	2310021G01Rik	NM_025866.1	NA	RIKEN cDNA 2310021G01 gene
H3070F07	-1.86112	-10.3355	0.00193209	0.0406117	Mm.209385	Lpp	NM_178665.3	NA	LIM domain containing preferred translocation partner in lipoma
H3115D10	-1.10977	-10.3144	0.00194371	0.0407313	Mm.27090	C330018L13Rik	NM_198176.1	NA	RIKEN cDNA C330018L13 gene
H3090B04	-1.11648	-10.3039	0.00194953	0.0407496	Mm.280656	Usp1	NM_146144.2	NA	ubiquitin specific protease 1
H3023E07	-0.781575	-10.2979	0.00195289	0.0407682	Mm.275281	Narg1	NM_053089.2	NA	NMDA receptor-regulated gene 1
H3003G11	-0.32755	-10.2638	0.00197197	0.0409474	Mm.100550	NA	NA	CD553817.1	Mus musculus transcribed sequences
H3135C12	-0.344125	-10.2588	0.00197481	0.0409474	Mm.211654	MGC6357	NM_144791.1	NA	hypothetical protein MGC6357
H3094F10	-0.88915	-10.256	0.0019764	0.0409474	Mm.294783	2610102K23Rik	NM_153787.1	NA	RIKEN cDNA 2610102K23 gene
H3117H04	-0.3678	-10.2247	0.00199414	0.0411794	Mm.300118	NA	NA	BY005405.1	Mus musculus transcribed sequence with strong similarity to protein sp:P12268 (H.sapiens) IMD2_HUMAN Inosine-5'-monophosphate dehydrogenase 2 (IMP dehydrogenase 2) (IMPDH-II) (IMPD 2)
H3069G11	-0.370425	-10.2141	0.00200022	0.0411794	Mm.129136	2610024G14Rik	NM_019836.1	NA	RIKEN cDNA 2610024G14 gene
T027	-0.589475	-10.1814	0.00201915	0.0411794	Mm.29845	Suclg1	NM_019879.1	NA	succinate-CoA ligase, GDP-forming, alpha subunit
H3017A04	-1.34502	-10.1308	0.00204883	0.0411794	NA	NA	NA	NA	EST
H3049G08	-1.36625	-10.1209	0.00205472	0.0411794	Mm.275281	Narg1	NM_053089.2	NA	NMDA receptor-regulated gene 1
H3018F01	-1.145	-10.1087	0.00206202	0.0411794	Mm.7906	Pin1	NM_023371.2	NA	protein (peptidyl-prolyl cis/trans isomerase) NIMA-interacting 1
H3077C05	-0.757225	-10.1077	0.00206259	0.0411794	Mm.116991	2410198H06Rik	NA	AK017416.1	RIKEN cDNA 2410198H06 gene
P894	-0.74055	-10.0937	0.00207101	0.0412522	Mm.35584	Skp2	NM_013787.1	NA	S-phase kinase-associated protein 2 (p45)
H3112E12	-0.5251	-10.09	0.00207324	0.0412522	Mm.30059	Marcks	NM_008538.1	NA	myristoylated alanine rich protein kinase C substrate
H3018D12	-0.370125	-10.0891	0.00207376	0.0412522	Mm.30210	Psma6	NM_011968.1	NA	proteasome (prosome, macropain) subunit, alpha type 6
H3023D03	-1.91075	-10.0837	0.00207702	0.0412654	Mm.33935	B3gnt5	NM_054052.2	NA	UDP-GlcNAc:betaGal beta-1,3-N-acetylglucosaminyltransferase 5
H3010B09	-1.13548	-10.0797	0.00207943	0.0412654	Mm.196332	Trnt1	NM_027296.1	NA	tRNA nucleotidyl transferase, CCA-adding, 1
H3112E04	-1.01578	-10.0731	0.00208344	0.0412926	Mm.275788	2310005D06Rik	NM_025513.1	NA	RIKEN cDNA 2310005D06 gene
H3055E11	-0.280875	-10.0477	0.00209892	0.0413663	Mm.189102	2810047L02Rik	NM_029766.1	NA	RIKEN cDNA 2810047L02 gene
H3095G01	-0.79255	-10.0434	0.00210157	0.0413663	Mm.289936	Psat1	NA	AK035361.1	phosphoserine aminotransferase 1
H3060A05	-0.769275	-10.0425	0.00210209	0.0413663	Mm.19271	Crim1	NA	AK053197.1	cysteine-rich motor neuron 1
H3113C07	-0.6902	-10.0367	0.00210568	0.0413874	Mm.291824	BC032271	NM_146234.2	NA	cDNA sequence BC032271
H3106B06	-0.5871	-10.0205	0.00211567	0.041446	Mm.254134	Gpiap1	NM_016739.1	NA	GPI-anchored membrane protein 1
H3150G01	-3.68895	-10.0189	0.00211668	0.041446	Mm.193	Itm2a	NM_008409.1	NA	integral membrane protein 2A
H3114A08	-0.77085	-10.0156	0.00211873	0.041446	Mm.262037	Eif1a	NM_010120.3	NA	eukaryotic translation initiation factor 1A
H3127E06	-0.97	-10.0089	0.00212288	0.0414648	Mm.30078	Ga17	NM_145380.1	NA	dendritic cell protein GA17
H3022A11	-2.39443	-10.0059	0.00212472	0.0414648	Mm.212567	Cald1	NM_145575.1	NA	caldesmon 1
H3075D04	-1.18395	-9.99158	0.00213366	0.0414956	Mm.29133	Bub1b	NM_009773.1	NA	budding uninhibited by benzimidazoles 1 homolog, beta (S. cerevisiae)
H3027C02	-1.13948	-9.98292	0.00213909	0.0414956	Mm.25264	Ddx21	NM_019553.1	NA	DEAD (Asp-Glu-Ala-Asp) box polypeptide 21
T383	-0.716525	-9.97022	0.00214708	0.0414956	Mm.6254	Ucp3	NM_009464.2	NA	uncoupling protein 3, mitochondrial
H3087F05	-0.95195	-9.95665	0.00215566	0.0414956	Mm.8142	2310007F12Rik	NM_175146.2	NA	RIKEN cDNA 2310007F12 gene
H3151G08	-0.5711	-9.94205	0.00216495	0.0414956	Mm.11815	B230312B02Rik	NA	BC038818.1	RIKEN cDNA B230312B02 gene
H3015A06	-1.35223	-9.93322	0.00217059	0.0414956	Mm.2215	Tcof1	NM_011552.1	NA	Treacher Collins Franceschetti syndrome 1, homolog
H3012G08	-0.77545	-9.93281	0.00217085	0.0414956	NA	NA	NA	NA	EST
H3069G09	-0.9629	-9.93156	0.00217165	0.0414956	Mm.5697	NA	NA	AK086861.1	Mus musculus 0 day neonate lung cDNA, RIKEN full-length enriched library, clone:E030006G18 product:unknown EST, full insert sequence
H3084D03	-0.28135	-9.91882	0.00217984	0.0415368	Mm.233587	Mgat4a	NM_173870.1	NA	mannoside acetylglucosaminyltransferase 4, isoenzyme A
H3009D11	-1.41105	-9.91034	0.0021853	0.0415368	Mm.35492	2600013N14Rik	NM_152812.1	NA	RIKEN cDNA 2600013N14 gene
H3100B03	-0.66165	-9.90974	0.00218569	0.0415368	NA	NA	NA	NA	EST
H3103A10	-1.33567	-9.90099	0.00219135	0.0415632	Mm.28560	Lyar	NM_025281.1	NA	Ly1 antibody reactive clone
H3110H02	-1.09712	-9.89253	0.00219684	0.041591	NA	NA	NA	NA	EST
H3118B06	-0.4799	-9.88348	0.00220274	0.041609	Mm.198119	E130318E12Rik	NM_145510.1	NA	RIKEN cDNA E130318E12 gene
P938	-0.854	-9.85562	0.00222102	0.041609	Mm.42195	Ruvbl1	NM_019685.1	NA	RuvB-like protein 1
H3089G02	-0.547175	-9.84189	0.0022301	0.041609	Mm.210405	Mtmr2	NM_023858.1	NA	myotubularin related protein 2
H3112B10	-0.674	-9.84028	0.00223117	0.041609	Mm.41744	AW545966	NM_177771.2	NA	expressed sequence AW545966
H3064B12	-1.5046	-9.83979	0.0022315	0.041609	NA	NA	NA	NA	EST
H3071G01	-0.9917	-9.83959	0.00223163	0.041609	Mm.245522	Ankrd17	NM_198010.2	NA	ankyrin repeat domain 17
H3051C08	-1.64498	-9.82438	0.00224176	0.041609	Mm.41423	2310067E08Rik	NM_028013.1	NA	RIKEN cDNA 2310067E08 gene
H3056A11	-0.28615	-9.78024	0.00227151	0.0419439	Mm.25903	Nab1	NM_008667.2	NA	Ngfi-A binding protein 1
H3022H08	-0.455325	-9.76742	0.00228024	0.0419641	Mm.121265	Psma1	NM_011965.1	NA	proteasome (prosome, macropain) subunit, alpha type 1
T368	-0.48655	-9.75373	0.00228962	0.0420288	Mm.18494	Map2k3	NM_008928.1	NA	mitogen activated protein kinase kinase 3
H3016C12	-0.9845	-9.75234	0.00229058	0.0420288	Mm.42195	Ruvbl1	NM_019685.1	NA	RuvB-like protein 1
H3111C05	-0.57615	-9.75113	0.00229141	0.0420288	Mm.17917	D4Wsu27e	NM_025994.2	NA	DNA segment, Chr 4, Wayne State University 27, expressed
H3047H06	-3.6887	-9.72124	0.00231209	0.0422668	Mm.25670	1700110N18Rik	NA	AK031197.1	RIKEN cDNA 1700110N18 gene
H3034D01	-0.2688	-9.69998	0.00232695	0.0424276	NA	NA	NA	NA	EST
H3027H10	-0.89315	-9.69761	0.00232861	0.0424276	Mm.29363	Nol5a	NM_024193.1	NA	nucleolar protein 5A
H3027D08	-1.4352	-9.68207	0.00233956	0.0425497	Mm.258051	Nupl1	NM_170591.1	NA	nucleoporin like 1
H3002C12	-0.578575	-9.67339	0.00234571	0.0425497	Mm.3065	Xrn2	NM_011917.1	NA	5'-3' exoribonuclease 2
H3078H06	-0.564875	-9.66805	0.0023495	0.0425497	Mm.291755	1190005P17Rik	NM_025431.2	NA	RIKEN cDNA 1190005P17 gene
H3096B01	-1.25515	-9.64849	0.00236346	0.0425497	NA	NA	NA	NA	EST
H3046G01	-0.6746	-9.64483	0.00236608	0.0425497	NA	NA	NA	NA	EST
H3032A09	-0.3572	-9.64239	0.00236783	0.0425497	Mm.222536	Slc25a17	NM_011399.1	NA	solute carrier family 25 (mitochondrial carrier; peroxisomal membrane protein), member 17
H3120B11	-3.15998	-9.63209	0.00237525	0.0425497	Mm.249146	Fbln2	NM_007992.1	NA	fibulin 2
H3111G12	-0.403	-9.62052	0.00238361	0.0425497	Mm.254626	Slc30a7	NM_023214.3	NA	solute carrier family 30 (zinc transporter), member 7
H3060E04	-0.602575	-9.61337	0.0023888	0.0425497	Mm.244236	6030436C20Rik	NM_178654.2	NA	RIKEN cDNA 6030436C20 gene
H3114G01	-0.680375	-9.60539	0.00239461	0.0425497	Mm.21163	Sec23ip	NA	AK048053.1	Sec23 interacting protein
P261	-0.40015	-9.59686	0.00240084	0.0425497	NA	NA	NA	NA	EST
H3026C01	-1.01137	-9.5961	0.00240139	0.0425497	Mm.28038	D4Ertd421e	NA	BY030388.1	DNA segment, Chr 4, ERATO Doi 421, expressed
H3072A12	-0.52785	-9.5917	0.00240461	0.0425497	Mm.292656	MGC29021	NM_144825.1	NA	hypothetical protein MGC29021
P538	-0.888125	-9.57598	0.00241617	0.0425497	Mm.290563	Cenpa	NM_007681.1	NA	centromere autoantigen A
H3109F11	-0.616575	-9.56766	0.00242233	0.0425497	Mm.89148	4632409L19Rik	NA	AK129317.1	RIKEN cDNA 4632409L19 gene
H3013E02	-1.01418	-9.5645	0.00242467	0.0425497	Mm.28057	1110064N10Rik	NM_026396.2	NA	RIKEN cDNA 1110064N10 gene
H3018B11	-0.46	-9.55683	0.00243036	0.0425497	Mm.296366	Rai1	NM_009021.1	NA	retinoic acid induced 1
H3001E01	-0.51935	-9.55662	0.00243052	0.0425497	Mm.223744	Kif5b	NM_008448.1	NA	kinesin family member 5B
H3025C06	-1.38518	-9.55611	0.0024309	0.0425497	Mm.257223	Mga	NM_013720.1	NA	MAX gene associated
H3138B02	-0.5755	-9.54217	0.00244129	0.0425498	Mm.13437	4833420O05Rik	NM_027554.2	NA	RIKEN cDNA 4833420O05 gene
H3156H10	-1.52493	-9.54201	0.00244141	0.0425498	Mm.29054	2610529I12Rik	NM_145706.1	NA	RIKEN cDNA 2610529I12 gene
H3090F12	-0.976075	-9.53108	0.00244961	0.0425498	Mm.20935	Ilf3	NM_010561.1	NA	interleukin enhancer binding factor 3
T018	-0.8241	-9.52161	0.00245673	0.0425498	Mm.41502	Fh1	NM_010209.1	NA	fumarate hydratase 1
H3066D12	-0.222725	-9.48139	0.00248732	0.0430013	Mm.173596	NA	NA	AU023131.1	Mus musculus transcribed sequences
H3049F11	-0.9313	-9.47522	0.00249205	0.0430013	Mm.28035	NA	NA	BC048354.1	Mus musculus ES cells cDNA, RIKEN full-length enriched library, clone:C330022M23 product:unclassifiable, full insert sequence
P800	-1.05105	-9.45881	0.00250471	0.0430013	Mm.245640	Fmn	NM_010230.1	NA	formin
H3154H10	-0.45825	-9.45679	0.00250627	0.0430013	Mm.295031	Ddx27	NM_153065.1	NA	DEAD (Asp-Glu-Ala-Asp) box polypeptide 27
H3005B11	-0.54945	-9.45056	0.0025111	0.0430013	Mm.19169	Txnl	NM_016792.2	NA	thioredoxin-like
P908	-1.11165	-9.44764	0.00251337	0.0430013	Mm.218891	Catnal1	NM_018761.2	NA	catenin alpha-like 1
H3019E05	-1.47893	-9.44331	0.00251674	0.0430013	Mm.4550	Atp1b1	NM_009721.2	NA	ATPase, Na+/K+ transporting, beta 1 polypeptide
P816	-0.9366	-9.43353	0.00252437	0.043087	NA	NA	NA	NA	EST
H3012G02	-0.532175	-9.4246	0.00253136	0.0431616	Mm.200086	2810411E22Rik	NA	BC023703.1	RIKEN cDNA 2810411E22 gene
H3105A11	-1.0693	-9.4091	0.00254356	0.043208	Mm.171256	9530058O11Rik	NM_144792.2	NA	RIKEN cDNA 9530058O11 gene
H3068H11	-0.487675	-9.39862	0.00255185	0.043208	Mm.302240	NA	NA	AU023727.1	Mus musculus transcribed sequence with weak similarity to protein ref:NP_083693.1 (M.musculus) RIKEN cDNA 9030605E16 [Mus musculus]
H3148D06	-0.266375	-9.39386	0.00255564	0.043208	Mm.21399	Itpa	NM_025922.2	NA	inosine triphosphatase (nucleoside triphosphate pyrophosphatase)
H3036B04	-1.22538	-9.38976	0.0025589	0.043208	Mm.172632	NA	NA	CK334475.1	Mus musculus transcribed sequences
H3032B01	-1.32127	-9.36552	0.00257828	0.043208	Mm.220367	Nol5	NM_018868.1	NA	nucleolar protein 5
H3124G08	-1.04573	-9.36411	0.00257942	0.043208	Mm.28068	Diap3	NM_019670.1	NA	diaphanous homolog 3 (Drosophila)
H3018F12	-1.03093	-9.36177	0.00258131	0.043208	Mm.28053	1110017C15Rik	NM_025391.1	NA	RIKEN cDNA 1110017C15 gene
H3016A11	-1.35448	-9.34823	0.00259224	0.043303	Mm.289841	2810430M08Rik	NM_026041.1	NA	RIKEN cDNA 2810430M08 gene
H3099F06	-1.67948	-9.3392	0.00259956	0.0433814	Mm.125972	4933424A20Rik	NA	BY267820.1	RIKEN cDNA 4933424A20 gene
H3005B05	-0.93135	-9.32572	0.00261055	0.0434944	Mm.254974	5730472N09Rik	NM_175392.3	NA	RIKEN cDNA 5730472N09 gene
H3093F08	-0.7741	-9.31797	0.0026169	0.0434944	Mm.272826	Ddx20	NM_017397.2	NA	DEAD (Asp-Glu-Ala-Asp) box polypeptide 20
H3087C12	-1.09195	-9.29232	0.00263804	0.043624	Mm.26468	4632434I11Rik	NM_028729.1	NA	RIKEN cDNA 4632434I11 gene
H3017G06	-0.606725	-9.27312	0.00265402	0.0436834	Mm.28922	Farsl	NM_011811.2	NA	phenylalanine-tRNA synthetase-like
H3036F09	-1.41505	-9.27219	0.00265479	0.0436834	Mm.4237	Top2a	NM_011623.1	NA	topoisomerase (DNA) II alpha
H3027G03	-1.19142	-9.24464	0.00267795	0.0439455	Mm.260114	Ccnb1	NM_172301.2	NA	cyclin B1
H3013D08	-0.16565	-9.23742	0.00268406	0.0439455	Mm.18516	H3f3b	NM_008211.2	NA	H3 histone, family 3B
H3059H09	-0.5953	-9.23209	0.00268859	0.043976	Mm.28275	Rbmx	NM_011252.2	NA	RNA binding motif protein, X chromosome
H3137G03	-1.02305	-9.2055	0.00271131	0.0442072	Mm.23503	6720463M24Rik	NM_175265.2	NA	RIKEN cDNA 6720463M24 gene
H3061A01	-0.822225	-9.19931	0.00271664	0.0442072	Mm.246668	Smarca5	NM_053124.2	NA	SWI/SNF related, matrix associated, actin dependent regulator of chromatin, subfamily a, member 5
H3054A06	-0.586325	-9.19463	0.00272068	0.0442072	Mm.127617	D17Ertd441e	NM_198937.1	NA	DNA segment, Chr 17, ERATO Doi 441, expressed
P338	-0.59145	-9.18484	0.00272915	0.0442072	Mm.4342	Tjp1	NM_009386.1	NA	tight junction protein 1
H3064H08	-1.3361	-9.17817	0.00273494	0.0442072	Mm.6751	BC049989	NM_173762.2	NA	cDNA sequence BC049989
H3117A12	-0.922325	-9.16031	0.00275052	0.0444155	Mm.42203	Kif11	NA	BC027581.1	kinesin family member 11
H3024G12	-0.595	-9.15094	0.00275874	0.0444684	Mm.274426	Hs3st3b	NM_018805.1	NA	heparan sulfate (glucosamine) 3-O-sulfotransferase 3B
H3005B10	-0.721875	-9.13459	0.00277317	0.0446314	Mm.25269	Bms1l	NM_194339.1	NA	BMS1-like, ribosome assembly protein (yeast)
H3098B06	-0.9684	-9.13283	0.00277473	0.0446314	Mm.291820	NA	NA	CA578740.1	Mus musculus transcribed sequence with moderate similarity to protein sp:Q9BQ67 (H.sapiens) GRWD_HUMAN Glutamate-rich WD repeat protein
H3103B02	-0.862025	-9.12907	0.00277806	0.0446414	Mm.35828	Wdr18	NA	AK082695.1	WD repeat domain 18
H3112B06	-0.4375	-9.11933	0.00278673	0.0447243	Mm.64065	Ing5	NM_029340.1	NA	inhibitor of growth family, member 5
H3136E05	-1.12983	-9.09479	0.00280871	0.0449149	Mm.2185	Bub1	NM_009772.1	NA	budding uninhibited by benzimidazoles 1 homolog (S. cerevisiae)
H3024B11	-1.37413	-9.07597	0.00282572	0.0450042	Mm.4742	Pa2g4	NM_011119.1	NA	proliferation-associated 2G4
H3070E10	-0.786825	-9.07596	0.00282573	0.0450042	Mm.212157	4930453N24Rik	NA	AK075826.1	RIKEN cDNA 4930453N24 gene
H3017B01	-0.491525	-9.06779	0.00283316	0.0450042	Mm.25429	Nrf1	NM_010938.2	NA	nuclear respiratory factor 1
H3007D11	-0.746825	-9.06548	0.00283527	0.0450042	Mm.30078	Ga17	NM_145380.1	NA	dendritic cell protein GA17
H3088D07	-1.15013	-9.06029	0.00284001	0.0450042	Mm.258676	Zdhhc14	NA	BY639426.1	zinc finger, DHHC domain containing 14
H3076D02	-1.59072	-9.05416	0.00284561	0.0450042	Mm.282719	Eya2	NM_010165.1	NA	eyes absent 2 homolog (Drosophila)
H3096G06	-0.254	-9.04634	0.00285279	0.0450042	Mm.309021	NA	NA	BY439221.1	Mus musculus transcribed sequences
H3087H03	-1.96362	-9.0377	0.00286075	0.0450042	Mm.22379	5730555F13Rik	NM_025690.1	NA	RIKEN cDNA 5730555F13 gene
H3079D11	-0.519475	-9.03429	0.00286389	0.0450107	Mm.228433	Slc12a2	NM_009194.1	NA	solute carrier family 12, member 2
T425	-1.5632	-8.99551	0.00290002	0.0451904	Mm.4078	Mki67	NA	AK082099.1	antigen identified by monoclonal antibody Ki 67
H3028F06	-0.608225	-8.98162	0.00291311	0.0452419	Mm.279780	Rab17	NM_008998.2	NA	RAB17, member RAS oncogene family
H3038C10	-0.267625	-8.97988	0.00291476	0.0452419	Mm.154720	NA	NA	C77831.1	Mus musculus transcribed sequences
H3026G03	-0.775025	-8.97582	0.0029186	0.0452419	Mm.251013	Kpnb1	NM_008379.2	NA	karyopherin (importin) beta 1
H3068B04	-0.946975	-8.97455	0.00291981	0.0452419	Mm.273285	2410011K10Rik	NM_021344.2	NA	RIKEN cDNA 2410011K10 gene
H3010A04	-0.2118	-8.96963	0.00292448	0.0452498	Mm.265610	Ptbp1	NM_008956.1	NA	polypyrimidine tract binding protein 1
H3008D01	-0.77225	-8.92815	0.00296423	0.0457152	Mm.195753	Pole4	NM_025882.1	NA	polymerase (DNA-directed), epsilon 4 (p12 subunit)
P036	-2.68492	-8.92379	0.00296845	0.0457375	Mm.465	Cxcl12	NM_013655.2	NA	chemokine (C-X-C motif) ligand 12
H3007C11	-1.09925	-8.91463	0.00297734	0.0457461	Mm.182542	NA	NA	CK336203.1	Mus musculus transcribed sequences
H3035G06	-1.09597	-8.90833	0.00298349	0.0457552	Mm.1773	Sh3gl1	NM_013664.1	NA	SH3-domain GRB2-like 1
H3084H09	-0.7145	-8.88365	0.00300768	0.0458221	Mm.6856	Pttg1	NM_013917.1	NA	pituitary tumor-transforming 1
H3034H03	-1.37753	-8.88299	0.00300834	0.0458221	Mm.27913	2610016F04Rik	NM_025847.1	NA	RIKEN cDNA 2610016F04 gene
H3095E05	-1.02273	-8.88002	0.00301126	0.0458221	NA	NA	NA	NA	EST
H3127A08	-0.89455	-8.86801	0.00302315	0.0458221	Mm.61901	Mtbp	NM_134092.2	NA	Mdm2, transformed 3T3 cell double minute p53 binding protein
H3044H09	-1.13915	-8.86324	0.0030279	0.0458221	Mm.214959	BB128963	NM_172742.1	NA	expressed sequence BB128963
H3147C04	-0.549675	-8.86038	0.00303074	0.0458221	Mm.172674	Lamb1-1	NM_008482.1	NA	laminin B1 subunit 1
H3049G10	-0.79425	-8.85944	0.00303168	0.0458221	Mm.172892	NA	NA	BG067033.2	Mus musculus transcribed sequences
H3150F12	-1.13542	-8.85875	0.00303236	0.0458221	Mm.150686	1110013J05Rik	NM_025392.1	NA	RIKEN cDNA 1110013J05 gene
H3120G09	-0.903575	-8.81554	0.00307584	0.0460675	Mm.127731	Pycr1	NM_144795.1	NA	pyrroline-5-carboxylate reductase 1
H3004H05	-2.28147	-8.81473	0.00307665	0.0460675	Mm.289662	Ddx3y	NM_012008.1	NA	DEAD (Asp-Glu-Ala-Asp) box polypeptide 3, Y-linked
H3031H01	-0.8991	-8.80546	0.00308609	0.0460675	Mm.24117	D8Ertd319e	NM_026792.2	NA	DNA segment, Chr 8, ERATO Doi 319, expressed
H3016B12	-1.0139	-8.80538	0.00308618	0.0460675	Mm.3411	Orc2l	NM_008765.2	NA	origin recognition complex, subunit 2-like (S. cerevisiae)
H3024F07	-0.665	-8.80264	0.00308897	0.0460675	Mm.41502	Fh1	NM_010209.1	NA	fumarate hydratase 1
H3021A07	-0.8834	-8.79464	0.00309716	0.0460675	Mm.218891	Catnal1	NM_018761.2	NA	catenin alpha-like 1
H3035H07	-0.850225	-8.79016	0.00310175	0.0460675	Mm.24937	1500001M20Rik	NA	BC028463.1	RIKEN cDNA 1500001M20 gene
H3066D04	-1.3973	-8.7833	0.00310881	0.0460892	Mm.291062	NA	NA	CA567268.1	Mus musculus similar to DYSKERIN (LOC245474), mRNA
H3020B11	-0.6745	-8.77247	0.00311999	0.046121	Mm.281517	5730598B06	NA	AK077755.1	hypothetical protein 5730598B06
H3081C11	-0.639225	-8.77173	0.00312075	0.046121	Mm.271990	4930402H24Rik	NM_029432.1	NA	RIKEN cDNA 4930402H24 gene
H3006A04	-0.6859	-8.77148	0.00312101	0.046121	Mm.2948	H2-Ke2	NM_010385.1	NA	H2-K region expressed gene 2
H3018H03	-1.81575	-8.76498	0.00312775	0.046121	Mm.288669	Bzw2	NM_025840.2	NA	basic leucine zipper and W2 domains 2
H3009H10	-0.661125	-8.76074	0.00313215	0.0461446	NA	NA	NA	NA	EST
H3058F06	-1.08065	-8.7429	0.00315079	0.0462124	Mm.103116	2310047O13Rik	NM_024185.3	NA	RIKEN cDNA 2310047O13 gene
H3147F05	-0.730275	-8.73756	0.00315639	0.0462124	Mm.129481	Nr3c1	NM_008173.1	NA	nuclear receptor subfamily 3, group C, member 1
H3021B12	-0.89965	-8.72826	0.00316618	0.0463146	Mm.11480	2810470K21Rik	NM_023323.2	NA	RIKEN cDNA 2810470K21 gene
H3074F11	-0.624675	-8.72487	0.00316977	0.0463258	Mm.247080	Lsm7	NM_025349.1	NA	LSM7 homolog, U6 small nuclear RNA associated (S. cerevisiae)
H3060E07	-1.16625	-8.7175	0.00317757	0.0463988	Mm.274160	Sah	NM_016870.2	NA	SA rat hypertension-associated homolog
H3015F10	-0.41075	-8.70133	0.00319478	0.0465458	Mm.246863	1500019O16Rik	NM_027328.2	NA	RIKEN cDNA 1500019O16 gene
H3105E06	-1.52717	-8.68932	0.00320764	0.046631	Mm.17875	2610043O12Rik	NM_172402.1	NA	RIKEN cDNA 2610043O12 gene
H3137F07	-0.26155	-8.68092	0.00321667	0.0467007	Mm.103074	NA	NA	CA752218.1	Mus musculus transcribed sequence with moderate similarity to protein ref:NP_061934.1 (H.sapiens) phosphatidylinositol-3 phosphate 3-phosphatase adaptor subunit; KIAA1682 protein; 3-phosphatase adapter subunit [Homo sapiens]
H3022D05	-1.61553	-8.67959	0.0032181	0.0467007	Mm.297920	Tpbpb	NM_007796.1	NA	trophoblast specific protein beta
H3153C03	-1.25263	-8.64297	0.00325791	0.0469541	Mm.28840	Rest	NM_011263.1	NA	RE1-silencing transcription factor
H3092F06	-0.948125	-8.63967	0.00326152	0.0469541	NA	NA	NA	NA	EST
H3122G06	-1.68275	-8.63033	0.00327179	0.0469541	Mm.271745	Nrp	NM_008737.1	NA	neuropilin
H3078B05	-0.5534	-8.62958	0.00327262	0.0469541	Mm.282872	4932441K18	NM_178935.2	NA	CXORF15
H3099D10	-1.2372	-8.62097	0.00328213	0.0469636	Mm.10565	NA	NA	BY018674.1	Mus musculus mRNA for mszf55-2, partial cds.
H3022H04	-0.999025	-8.61785	0.00328559	0.0469636	Mm.235074	D8Ertd594e	NM_133791.1	NA	DNA segment, Chr 8, ERATO Doi 594, expressed
H3002C07	-1.08385	-8.61352	0.00329039	0.0469636	Mm.646	Tpm2	NM_009416.2	NA	tropomyosin 2, beta
H3104G12	-1.33383	-8.60423	0.00330072	0.0470296	Mm.214959	BB128963	NM_172742.1	NA	expressed sequence BB128963
H3004F02	-1.39492	-8.58611	0.00332101	0.0472369	Mm.821	Snrpa1	NM_021336.3	NA	small nuclear ribonucleoprotein polypeptide A'
H3008C02	-0.753275	-8.56338	0.00334669	0.0473568	Mm.267692	Txnl2	NM_023140.3	NA	thioredoxin-like 2
H3149E10	-1.14377	-8.55636	0.00335467	0.047429	Mm.176695	2310035M22Rik	NM_025863.2	NA	RIKEN cDNA 2310035M22 gene
H3006B06	-0.65865	-8.54911	0.00336295	0.0475052	Mm.176347	D530033C11Rik	NM_030132.2	NA	RIKEN cDNA D530033C11 gene
H3127D03	-2.65238	-8.5458	0.00336673	0.0475089	Mm.2608	Bgn	NM_007542.3	NA	biglycan
H3033F07	-1.061	-8.52244	0.0033936	0.0476928	Mm.32800	1110007N04Rik	NA	AK079371.1	RIKEN cDNA 1110007N04 gene
H3137B06	-1.10765	-8.514	0.00340338	0.0477488	Mm.117296	Oat	NM_016978.1	NA	ornithine aminotransferase
H3088E11	-0.5752	-8.4928	0.00342811	0.0479853	Mm.4364	Il6st	NM_010560.2	NA	interleukin 6 signal transducer
H3004D06	-0.8332	-8.49237	0.00342862	0.0479853	Mm.289662	Ddx3y	NM_012008.1	NA	DEAD (Asp-Glu-Ala-Asp) box polypeptide 3, Y-linked
H3039C08	-0.818775	-8.48426	0.00343815	0.0479853	Mm.257952	8430420C20Rik	NM_145586.1	NA	RIKEN cDNA 8430420C20 gene
H3008C12	-0.64435	-8.47739	0.00344624	0.0479853	Mm.38151	Adsl	NM_009634.3	NA	adenylosuccinate lyase
H3095H01	-0.97935	-8.47212	0.00345247	0.0479853	Mm.288602	Rbbp2	NA	BC022581.1	retinoblastoma binding protein 2
H3017E11	-0.72225	-8.46962	0.00345543	0.0479853	Mm.89341	Hsp70-4	NM_015765.1	NA	heat shock protein 4
H3020G03	-0.9237	-8.4501	0.00347865	0.048201	Mm.330687	NA	NA	CB236504.1	Mus musculus transcribed sequences
H3126C06	-0.63105	-8.44566	0.00348396	0.048201	Mm.29615	2610001J05Rik	NM_183258.1	NA	RIKEN cDNA 2610001J05 gene
H3009F01	-1.13672	-8.44534	0.00348435	0.048201	Mm.13705	Rrbp1	NM_024281.1	NA	ribosome binding protein 1
H3095D10	-0.703975	-8.44449	0.00348536	0.048201	Mm.279721	2310008M10Rik	NM_025509.2	NA	RIKEN cDNA 2310008M10 gene
H3061H09	-0.2405	-8.4105	0.00352641	0.0483442	Mm.259294	Rev1l	NM_019570.2	NA	REV1-like (S. cerevisiae)
H3024G02	-0.856725	-8.40857	0.00352876	0.0483442	Mm.287178	Prps1	NM_021463.2	NA	phosphoribosyl pyrophosphate synthetase 1
H3002E06	-1.14338	-8.40584	0.00353209	0.0483442	Mm.3636	Dbt	NM_010022.1	NA	dihydrolipoamide branched chain transacylase E2
H3015E08	-1.26405	-8.40438	0.00353387	0.0483442	Mm.28161	NA	NA	AF205221.1	Mus musculus Brf2 gene, 3' UTR
H3013F10	-0.6164	-8.39273	0.00354813	0.048462	Mm.316511	NA	NA	BG077297.1	Mus musculus transcribed sequence with weak similarity to protein pir:I58401 (M.musculus) I58401 protein-tyrosine kinase (EC 2.7.1.112) JAK3 - mouse
H3023C03	-0.9953	-8.38546	0.00355706	0.0484743	Mm.28478	2810475A17Rik	NM_028355.1	NA	RIKEN cDNA 2810475A17 gene
P133	-2.01898	-8.3724	0.00357318	0.0485918	Mm.286834	Bicc1	NM_031397.1	NA	bicaudal C homolog 1 (Drosophila)
H3099G07	-0.6227	-8.36333	0.00358443	0.0485918	Mm.274756	2810468K05Rik	NM_026051.2	NA	RIKEN cDNA 2810468K05 gene
H3013B11	-1.34787	-8.35376	0.00359636	0.0486462	Mm.131150	Dek	NM_025900.1	NA	DEK oncogene (DNA binding)
H3082E01	-0.3463	-8.33844	0.00361556	0.0486462	Mm.296840	NA	NA	AK043303.1	Mus musculus 7 days neonate cerebellum cDNA, RIKEN full-length enriched library, clone:A730082K24 product:unknown EST, full insert sequence
H3124C09	-0.27645	-8.33653	0.00361795	0.0486462	NA	NA	NA	NA	EST
H3014A06	-1.11597	-8.33459	0.0036204	0.0486462	Mm.45272	Hspbap1	NM_175111.2	NA	Hspb associated protein 1
H3125C12	-0.8939	-8.32647	0.00363065	0.0486974	NA	NA	NA	NA	EST
H3085A01	-0.39195	-8.31792	0.00364149	0.048803	Mm.211211	2310032D16Rik	NM_027096.1	NA	RIKEN cDNA 2310032D16 gene
N838	-0.8838	-8.31162	0.0036495	0.0488706	Mm.42195	Ruvbl1	NM_019685.1	NA	RuvB-like protein 1
H3141B03	-0.643825	-8.30268	0.0036609	0.0489345	Mm.28877	Ugp2	NM_139297.2	NA	UDP-glucose pyrophosphorylase 2
P905	-2.8526	-8.28644	0.00368174	0.0489999	Mm.14092	Foxc2	NM_013519.1	NA	forkhead box C2
H3009C05	-0.609225	-8.28367	0.00368531	0.0489999	Mm.261004	Uchl5	NM_019562.1	NA	ubiquitin carboxyl-terminal esterase L5
H3001F12	-1.51978	-8.27433	0.00369738	0.0489999	Mm.12559	Hs3st1	NM_010474.1	NA	heparan sulfate (glucosamine) 3-O-sulfotransferase 1
H3042C03	-0.3579	-8.26801	0.00370558	0.0489999	Mm.3256	Ap3m1	NM_018829.2	NA	adaptor-related protein complex 3, mu 1 subunit
H3017G12	-0.78635	-8.26483	0.00370973	0.0489999	Mm.299728	NA	NA	XM_354559.1	Mus musculus similar to LOC51319 protein (LOC380652), mRNA
H3019D11	-0.3848	-8.24674	0.00373336	0.0491545	NA	NA	NA	NA	EST
H3147G02	-0.886725	-8.24396	0.003737	0.0491631	Mm.292021	4921532K09Rik	NM_026149.2	NA	RIKEN cDNA 4921532K09 gene
H3052H03	-0.5134	-8.22869	0.00375715	0.0492083	NA	NA	NA	NA	EST
H3017E05	-0.477525	-8.22585	0.0037609	0.0492083	Mm.3757	Prpf8	NM_138659.1	NA	pre-mRNA processing factor 8
H3023B03	-1.85557	-8.22318	0.00376444	0.0492083	Mm.34609	Plac8	NM_139198.1	NA	placenta-specific 8
H3111C12	-0.671025	-8.22156	0.00376659	0.0492083	Mm.24105	Nde1	NM_023317.1	NA	nuclear distribution gene E homolog 1 (A nidulans)
H3048A09	-1.777	-8.21732	0.00377222	0.0492083	Mm.209385	Lpp	NM_178665.3	NA	LIM domain containing preferred translocation partner in lipoma
P203	-0.80565	-8.21528	0.00377494	0.0492083	Mm.172674	Lamb1-1	NM_008482.1	NA	laminin B1 subunit 1
H3019F07	-0.76	-8.19952	0.003796	0.049387	Mm.8235	Stk10	NM_009288.1	NA	serine/threonine kinase 10
H3032B06	-1.3905	-8.17456	0.00382967	0.0495917	Mm.6813	Bmp4	NM_007554.1	NA	bone morphogenetic protein 4
H3143G12	-0.389525	-8.16877	0.00383754	0.0496139	Mm.29214	2010311D03Rik	NM_133839.1	NA	RIKEN cDNA 2010311D03 gene
H3072G10	-1.6534	-8.15285	0.00385928	0.0496605	Mm.11815	B230312B02Rik	NA	BC038818.1	RIKEN cDNA B230312B02 gene
H3127B03	-0.628	-8.15227	0.00386008	0.0496605	NA	NA	NA	NA	EST
H3031A10	-0.621075	-8.15124	0.0038615	0.0496605	Mm.295124	NA	NA	BC023701.1	Mus musculus 7 days embryo whole body cDNA, RIKEN full-length enriched library, clone:C430002D13 product:TROPOMYOSIN 4 homolog [Homo sapiens], full insert sequence
H3131H08	-0.9758	-8.15069	0.00386225	0.0496605	Mm.2903	Prim1	NM_008921.1	NA	DNA primase, p49 subunit
H3132B09	-1.12043	-8.13185	0.00388822	0.0498081	Mm.217269	NA	NA	CA571481.1	Mus musculus NOD-derived CD11c +ve dendritic cells cDNA, RIKEN full-length enriched library, clone:F630035N16 product:hypothetical protein, full insert sequence
H3009E12	-0.5882	-8.12682	0.0038952	0.0498081	Mm.126873	Ppie	NM_019489.2	NA	peptidylprolyl isomerase E (cyclophilin E)
H3004H07	-1.2251	-8.12519	0.00389745	0.0498081	Mm.284481	AA408556	NA	AK122346.1	expressed sequence AA408556
H3085B03	-0.481025	-8.12486	0.00389792	0.0498081	Mm.276338	Rbm14	NM_009032.1	NA	RNA binding motif protein 14
H3148A10	-0.391075	-8.10951	0.00391931	0.0499265	Mm.6276	U2af1-rs2	NM_178794.2	NA	U2 small nuclear ribonucleoprotein auxiliary factor (U2AF) 1, related sequence 2
H3030C03	-0.7578	-8.09966	0.00393312	0.0499864	Mm.196371	2610511G16Rik	NM_026201.1	NA	RIKEN cDNA 2610511G16 gene

## Sheet: Ewing fdr up
MPCs EWS-FLI1 TUMOR First Round Vs MPCs EWS-FLI1 before injection induced genes
clone	UniGene	Gene.name	Annotation	DOF	M	STD	t	pvalue	fdr
H3014C11	Mm.29105	Gtf3a	general transcription factor III A	3	1.1118	0.045103	49.3006	9.18844e-06	0.151343
H3049H03	Mm.11311	2310057D15Rik	RIKEN cDNA 2310057D15 gene	3	1.23045	0.051112	48.147	9.86412e-06	0.081236
H3022G04	Mm.2462	Psmc2	proteasome (prosome, macropain) 26S subunit, ATPase 2	3	0.539325	0.02333	46.2353	1.11375e-05	0.0611487
H3100G01	Mm.288052	D5Ertd110e	DNA segment, Chr 5, ERATO Doi 110, expressed	3	0.666725	0.029223	45.6295	1.15865e-05	0.0477105
H3081E06	Mm.155687	D7Ertd413e	DNA segment, Chr 7, ERATO Doi 413, expressed	3	0.459875	0.020229	45.4671	1.1711e-05	0.0385783
H3081G02	Mm.43212	D7Ertd743e	DNA segment, Chr 7, ERATO Doi 743, expressed	3	0.70215	0.032923	42.6546	1.41803e-05	0.0389272
H3042G10	Mm.250919	Ndn	necdin	3	2.91628	0.144519	40.3584	1.67371e-05	0.0393824
H3158D06	Mm.295181	Sca2	spinocerebellar ataxia 2 homolog (human)	3	0.34165	0.017482	39.0862	1.84225e-05	0.0379297
H3105D01	Mm.235366	4930544L10Rik	RIKEN cDNA 4930544L10 gene	3	0.852375	0.045264	37.662	2.05887e-05	0.0376796
H3054B06	Mm.288052	D5Ertd110e	DNA segment, Chr 5, ERATO Doi 110, expressed	3	0.61105	0.036111	33.8425	2.83588e-05	0.0467098
H3065A03	Mm.24035	D16Ertd480e	DNA segment, Chr 16, ERATO Doi 480, expressed	3	0.3173	0.019016	33.3717	2.95737e-05	0.0442825
H3011B09	Mm.227275	D4Ertd786e	DNA segment, Chr 4, ERATO Doi 786, expressed	3	0.744775	0.047227	31.54	3.50175e-05	0.0480644
H3119B04	Mm.285724	Hspa8	heat shock protein 8	3	1.06482	0.070927	30.026	4.05711e-05	0.0514036
H3066C12	Mm.25548	Kpna3	karyopherin (importin) alpha 3	3	0.9967	0.066778	29.8513	4.12858e-05	0.0485728
H3029B11	Mm.4438	Hmga1	high mobility group AT-hook 1	3	1.31323	0.089287	29.4159	4.31408e-05	0.0473715
H3029B01	Mm.234608	Slc11a2	solute carrier family 11 (proton-coupled divalent metal ion transporters), member 2	3	1.17617	0.080158	29.3465	4.3447e-05	0.0447259
H3024D10	Mm.40292	2610033H07Rik	RIKEN cDNA 2610033H07 gene	3	1.18098	0.082271	28.7094	4.63952e-05	0.0449514
H3091G12	Mm.1056	Slc1a7	solute carrier family 1, member 7	3	1.53943	0.108102	28.4811	4.75169e-05	0.0434806
H3007A07	Mm.1514	Lpl	lipoprotein lipase	3	1.1982	0.088417	27.1034	5.5112e-05	0.0477763
P317	Mm.234608	Slc11a2	solute carrier family 11 (proton-coupled divalent metal ion transporters), member 2	3	1.24835	0.092185	27.0836	5.52326e-05	0.0454868
H3085B09	Mm.268606	D18Ertd653e	DNA segment, Chr 18, ERATO Doi 653, expressed	3	0.564925	0.042082	26.8488	5.66896e-05	0.0444635
H3006E06			EST	3	0.590925	0.044407	26.6142	5.81968e-05	0.0435709
H3112B06	Mm.64065	Ing5	inhibitor of growth family, member 5	3	0.3881	0.029683	26.1499	6.13411e-05	0.0439282
H3126D08	Mm.209349	3110005P07Rik	RIKEN cDNA 3110005P07 gene	3	0.69275	0.053985	25.6644	6.48754e-05	0.0445234
H3092A01	Mm.16753	Chek1	checkpoint kinase 1 homolog (S. pombe)	3	0.6228	0.049104	25.3668	6.71771e-05	0.044259
H3113F10	Mm.182601		Mus musculus 9 days embryo whole body cDNA, RIKEN full-length enriched library, clone:D030025E04 product:unclassifiable, full insert sequence	3	0.40965	0.032754	25.0138	7.00498e-05	0.0443766
H3067A11	Mm.277812	Vil2	villin 2	3	1.11498	0.091073	24.4853	7.46661e-05	0.0455491
H3151H07	Mm.261787	Stk19	serine/threonine kinase 19	3	0.564375	0.047369	23.8291	8.09793e-05	0.0476361
H3031C06	Mm.119177	Cops8	COP9 (constitutive photomorphogenic) homolog, subunit 8 (Arabidopsis thaliana)	3	0.5517	0.046889	23.5324	8.4067e-05	0.0477471
H3022B12	Mm.210048	2610511E03Rik	RIKEN cDNA 2610511E03 gene	3	1.13072	0.096462	23.4439	8.50184e-05	0.0466779
H3042F12	Mm.3093	Serpine2	serine (or cysteine) proteinase inhibitor, clade E, member 2	3	1.95083	0.167185	23.3373	8.61833e-05	0.0457911
H3140C07	Mm.271910	MGC56855	hypothetical protein MGC56855	3	0.597475	0.051492	23.2065	8.76428e-05	0.0451114
P851	Mm.38674	Sytl4	synaptotagmin-like 4	3	0.854725	0.0777	22.0005	0.000102783	0.051301
H3113D03	Mm.243802	Bnc	basonuclin	3	1.46995	0.13719	21.4293	0.000111178	0.0538594
H3093A11			EST	3	0.90495	0.085366	21.2016	0.000114781	0.0540157
H3123G09	Mm.14802	H19	H19 fetal liver mRNA	3	0.32665	0.030905	21.1388	0.000115801	0.0529823
H3133D10	Mm.182710		Mus musculus transcribed sequences	3	0.5708	0.054172	21.0737	0.000116871	0.0520268
H3023B12			EST	3	0.664575	0.065084	20.4222	0.00012835	0.0556331
P887	Mm.757	Arha	ras homolog gene family, member A	3	1.45095	0.143603	20.2078	0.000132455	0.05594
H3031D04	Mm.262000	Ptp4a1	protein tyrosine phosphatase 4a1	3	1.1506	0.114858	20.0351	0.000135889	0.0559557
H3125F09	Mm.288718		Mus musculus adult male cecum cDNA, RIKEN full-length enriched library, clone:9130226F15 product:unknown EST, full insert sequence	3	0.95335	0.095281	20.0113	0.000136371	0.0547844
H3030B02	Mm.28839	Eif2b1	eukaryotic translation initiation factor 2B, subunit 1 (alpha)	3	0.9194	0.094918	19.3725	0.000150222	0.0589121
H3038B03	Mm.268317	Plekhh1	pleckstrin homology domain containing, family H (with MyTH4 domain) member 1	3	0.727	0.075451	19.2709	0.000152595	0.058451
H3009C10	Mm.45371	Serpinb9b	serine (or cysteine) proteinase inhibitor, clade B, member 9b	3	2.32307	0.243127	19.11	0.000156458	0.0585685
H3023C01	Mm.25937	2700033G17Rik	RIKEN cDNA 2700033G17 gene	3	0.672425	0.071131	18.9068	0.000161522	0.0591208
H3124A07	Mm.227183	Eif4el3	eukaryotic translation initiation factor 4E like 3	3	0.59875	0.063432	18.8785	0.000162244	0.0580941
H3036E12	Mm.259795	Arhg	ras homolog gene family, member G	3	0.438375	0.047083	18.6214	0.000169011	0.0592294
H3005C06	Mm.45312	Anapc5	anaphase-promoting complex subunit 5	3	0.44275	0.04788	18.4941	0.0001725	0.0591927
H3149G06	Mm.38888	Serping1	serine (or cysteine) proteinase inhibitor, clade G, member 1	3	2.66135	0.288321	18.461	0.000173422	0.0582944
H3095G01	Mm.289936	Psat1	phosphoserine aminotransferase 1	3	1.38738	0.151878	18.2696	0.000178891	0.0589303
H3125E10	Mm.157190	Hmga2	high mobility group AT-hook 2	3	1.22995	0.134942	18.2293	0.000180072	0.0581561
H3118B06	Mm.198119	E130318E12Rik	RIKEN cDNA E130318E12 gene	3	0.57425	0.06355	18.0723	0.000184771	0.0585263
H3048E11			EST	3	2.0424	0.227544	17.9517	0.000188493	0.0585786
H3082B11	Mm.28319	BC046518	cDNA sequence BC046518	3	0.723425	0.081086	17.8435	0.000191916	0.058538
H3121F03	Mm.260766	2010004J24Rik	RIKEN cDNA 2010004J24 gene	3	0.337475	0.037878	17.8193	0.000192695	0.0577068
H3148B09	Mm.209349	3110005P07Rik	RIKEN cDNA 3110005P07 gene	3	0.628775	0.070624	17.8062	0.000193114	0.0567997
H3084A02	Mm.24730	2700064H14Rik	RIKEN cDNA 2700064H14 gene	3	0.52515	0.059529	17.6436	0.000198462	0.0573487
H3088F12	Mm.46679	3110070M22Rik	RIKEN cDNA 3110070M22 gene	3	1.18017	0.135877	17.3713	0.000207868	0.059031
H3027E05	Mm.4610	Upp1	uridine phosphorylase 1	3	1.4537	0.169845	17.118	0.000217156	0.0606234
H3095F11	Mm.285076	Dlat	dihydrolipoamide S-acetyltransferase (E2 component of pyruvate dehydrogenase complex)	3	0.69635	0.082001	16.9839	0.000222299	0.0610247
H3009E03	Mm.277812	Vil2	villin 2	3	0.945525	0.111686	16.9319	0.000224335	0.060574
H3106A01	Mm.276289	AI553587	expressed sequence AI553587	3	0.585225	0.06933	16.8823	0.0002263	0.0601191
H3080G12	Mm.289566	5330408N05Rik	RIKEN cDNA 5330408N05 gene	3	0.4486	0.053228	16.8559	0.000227358	0.0594415
H3014F03	Mm.277812	Vil2	villin 2	3	1.2691	0.151767	16.7244	0.000232718	0.0598922
H3094A03	Mm.139695	Epn2	epsin 2	3	0.571675	0.06846	16.701	0.000233688	0.0592165
H3105A11	Mm.171256	9530058O11Rik	RIKEN cDNA 9530058O11 gene	3	0.550925	0.066829	16.4877	0.000242793	0.0605917
H3016B03	Mm.13886	Sui1-rs1	suppressor of initiator codon mutations, related sequence 1 (S. cerevisiae)	3	0.2589	0.031503	16.4363	0.000245059	0.0602444
H3023B06	Mm.24433	Smt3h1	SMT3 (supressor of mif two, 3) homolog 1 (S. cerevisiae)	3	1.31658	0.161128	16.342	0.000249288	0.0603826
H3014H07	Mm.22929	Yars	tyrosyl-tRNA synthetase	3	0.739625	0.09144	16.1773	0.00025691	0.0613269
H3047A08	Mm.298899	Phgdh	3-phosphoglycerate dehydrogenase	3	0.330325	0.040939	16.1373	0.000258808	0.0608975
H3064C01	Mm.34456	2400003N08Rik	RIKEN cDNA 2400003N08 gene	3	0.448625	0.055614	16.1337	0.000258981	0.0600798
H3057E01	Mm.6670	Prkag1	protein kinase, AMP-activated, gamma 1 non-catalytic subunit	3	0.867725	0.107981	16.0719	0.000261952	0.0599252
H3046D07	Mm.235898	Supv3l1	suppressor of var1, 3-like 1 (S. cerevisiae)	3	0.563675	0.070342	16.0267	0.000264154	0.0596011
H3154G07	Mm.29254	Igfbp3	insulin-like growth factor binding protein 3	3	2.51345	0.314039	16.0073	0.000265108	0.0590079
H3135B07	Mm.29723		Mus musculus 10, 11 days embryo whole body cDNA, RIKEN full-length enriched library, clone:2810001A02 product:unknown EST, full insert sequence	3	0.67595	0.084557	15.9881	0.000266054	0.0584291
H3090C06	Mm.38674	Sytl4	synaptotagmin-like 4	3	1.87055	0.236279	15.8334	0.000273852	0.0593502
H3021A07	Mm.218891	Catnal1	catenin alpha-like 1	3	0.981675	0.124173	15.8114	0.000274985	0.0588218
H3118H06	Mm.34871	Idb2	inhibitor of DNA binding 2	3	1.61603	0.204727	15.7871	0.000276246	0.058334
H3134H01	Mm.28427	BC021395	cDNA sequence BC021395	3	0.807	0.102271	15.7817	0.000276529	0.0576545
H3110G01	Mm.181689	1110061L23Rik	RIKEN cDNA 1110061L23 gene	3	0.640525	0.081256	15.7656	0.000277366	0.0571061
H3039E11	Mm.5697		Mus musculus 0 day neonate lung cDNA, RIKEN full-length enriched library, clone:E030006G18 product:unknown EST, full insert sequence	3	0.711275	0.090624	15.6972	0.000280971	0.0571343
H3099D02	Mm.27951	1810015M01Rik	RIKEN cDNA 1810015M01 gene	3	1.38455	0.177732	15.5802	0.000287287	0.0577062
P665	Mm.31325	Gdf15	growth differentiation factor 15	3	0.65745	0.084712	15.522	0.000290502	0.057649
H3038G02	Mm.22031	Cstf2t	cleavage stimulation factor, 3' pre-RNA subunit 2, tau	3	0.6007	0.078107	15.3815	0.000298454	0.0585218
H3110B08	Mm.298654		Mus musculus 16 days neonate thymus cDNA, RIKEN full-length enriched library, clone:A130046D12 product:14-3-3 PROTEIN TAU (14-3-3 PROTEIN THETA), full insert sequence	3	0.4595	0.059762	15.3778	0.000298668	0.0578748
H3074E12	Mm.16974	Usp47	ubiquitin specific protease 47	3	0.350925	0.045744	15.3429	0.000300686	0.0575884
H3021A12	Mm.38433	Wars	tryptophanyl-tRNA synthetase	3	0.86655	0.112971	15.3411	0.000300791	0.0569464
H3020H10	Mm.278014	M6pr	mannose-6-phosphate receptor, cation dependent	3	0.90815	0.118525	15.3243	0.000301776	0.0564836
H3001F05	Mm.567	D16Bwg1547e	DNA segment, Chr 16, Brigham & Women's Genetics 1547 expressed	3	0.644125	0.084478	15.2496	0.000306183	0.0566646
P323	Mm.3093	Serpine2	serine (or cysteine) proteinase inhibitor, clade E, member 2	3	2.06553	0.271537	15.2136	0.000308342	0.0564299
H3015F03	Mm.31267	BC037006	cDNA sequence BC037006	3	0.9349	0.123305	15.164	0.000311344	0.0563532
H3050G02	Mm.1654	6230425C22Rik	RIKEN cDNA 6230425C22 gene	3	0.735725	0.098688	14.9101	0.00032735	0.0586063
H3094C12	Mm.298522	BC010304	cDNA sequence BC010304	3	0.68545	0.092427	14.8323	0.00033247	0.0588829
H3156G10	Mm.277812	Vil2	villin 2	3	1.13742	0.15382	14.7891	0.000335363	0.0587635
H3027E06	Mm.62876	D10Ertd749e	DNA segment, Chr 10, ERATO Doi 749, expressed	3	1.2776	0.174722	14.6244	0.000346694	0.0601094
H3109H12	Mm.28385	1810009M01Rik	RIKEN cDNA 1810009M01 gene	3	2.71572	0.371713	14.6119	0.000347571	0.0596337
H3060G09	Mm.175989	1810015H18Rik	RIKEN cDNA 1810015H18 gene	3	0.444825	0.060977	14.59	0.000349125	0.0592828
H3100F03	Mm.196210	C430041I18Rik	RIKEN cDNA C430041I18 gene	3	0.537875	0.073978	14.5416	0.000352583	0.0592592
H3083B04			EST	3	0.55835	0.076898	14.5218	0.00035401	0.058898
H3050F03	Mm.258923	Nucb	nucleobindin	3	0.17505	0.024197	14.4687	0.000357876	0.0589458
H3102F04	Mm.18635	Rgs10	regulator of G-protein signalling 10	3	1.3389	0.18549	14.4364	0.000360259	0.0587508
H3145F11	Mm.209419	Hspa9a	heat shock protein, A	3	0.6462	0.089765	14.3976	0.000363142	0.0586404
H3014A02	Mm.27363	Ppap2b	phosphatidic acid phosphatase type 2B	3	2.27822	0.319122	14.2781	0.000372231	0.0595245
H3058D06	Mm.290924	Zfp91	zinc finger protein 91	3	0.24185	0.033907	14.2653	0.000373223	0.0591092
H3039A09	Mm.172679	Spata5	spermatogenesis associated 5	3	0.2987	0.041933	14.2464	0.000374694	0.058777
H3077B03	Mm.173412		Mus musculus transcribed sequence with moderate similarity to protein ref:NP_081764.1 (M.musculus) RIKEN cDNA 5730493B19 [Mus musculus]	3	0.3936	0.055264	14.2443	0.000374855	0.0582476
H3101F11	Mm.10214	Tuft1	tuftelin 1	3	1.39758	0.196872	14.1978	0.000378509	0.0582656
H3017G09	Mm.9257	D10Wsu52e	DNA segment, Chr 10, Wayne State University 52, expressed	3	0.414375	0.058562	14.1517	0.000382178	0.0582857
H3030G08	Mm.276137	Atp5a1	ATP synthase, H+ transporting, mitochondrial F1 complex, alpha subunit, isoform 1	3	0.7003	0.09914	14.1275	0.000384117	0.058044
H3029H03	Mm.140365	Eif2b4	eukaryotic translation initiation factor 2B, subunit 4 delta	3	0.55215	0.07817	14.1269	0.000384168	0.0575239
P715	Mm.4993	Mmp3	matrix metalloproteinase 3	3	2.3	0.325983	14.1112	0.000385438	0.0571942
H3090E08	Mm.267131	D19Wsu12e	DNA segment, Chr 19, Wayne State University 12, expressed	3	0.96125	0.136443	14.0902	0.000387143	0.0569343
H3033F03	Mm.28270	Cdc5l	cell division cycle 5-like (S. pombe)	3	0.481525	0.068505	14.058	0.000389775	0.0568141
H3036F12			EST	3	1.78717	0.254447	14.0475	0.000390639	0.0564404
H3004E02	Mm.272101	Cdkn1b	cyclin-dependent kinase inhibitor 1B (P27)	3	0.374475	0.053375	14.0318	0.000391937	0.0561356
H3139E04	Mm.19131	C3	complement component 3	3	2.677	0.382211	14.008	0.000393918	0.0559329
H3095H03			EST	3	0.255775	0.036632	13.9647	0.000397541	0.055965
H3012G05	Mm.157758	D13Wsu177e	DNA segment, Chr 13, Wayne State University 177, expressed	3	1.2703	0.182917	13.8893	0.000403971	0.0563882
H3094A09	Mm.30166	Ncb5or	NADPH cytochrome B5 oxidoreductase	3	0.4938	0.071118	13.8868	0.00040419	0.0559446
H3024D12	Mm.274926	Emb	embigin	3	3.22178	0.467874	13.772	0.000414256	0.0568601
H3015E01	Mm.253902	C030004C14Rik	RIKEN cDNA C030004C14 gene	3	0.50385	0.073362	13.7361	0.000417475	0.0568283
H3080D12	Mm.27955	Wbscr1	Williams-Beuren syndrome chromosome region 1 homolog (human)	3	0.503625	0.073984	13.6144	0.00042862	0.0578672
H3055H02	Mm.249950		Mus musculus transcribed sequences	3	0.91025	0.134032	13.5826	0.000431598	0.0577955
H3155H08			EST	3	2.05275	0.30479	13.4699	0.000442378	0.0587614
H3062E09	Mm.262000	Ptp4a1	protein tyrosine phosphatase 4a1	3	0.9659	0.143521	13.4601	0.000443339	0.0584179
H3118D02	Mm.182931	Paics	phosphoribosylaminoimidazole carboxylase, phosphoribosylaminoribosylaminoimidazole, succinocarboxamide synthetase	3	0.59605	0.088708	13.4384	0.000445459	0.0582313
H3017F04	Mm.28663	Abcb6	ATP-binding cassette, sub-family B (MDR/TAP), member 6	3	0.8853	0.132089	13.4046	0.000448788	0.0582047
H3018H06	Mm.178424	2810047M21Rik	RIKEN cDNA 2810047M21 gene	3	0.181225	0.027046	13.4013	0.000449122	0.0577929
H3120E05	Mm.28484	Tm4sf8	transmembrane 4 superfamily member 8	3	0.441525	0.065921	13.3955	0.000449692	0.0574176
H3026A04	Mm.105331	Psip2	PC4 and SFRS1 interacting protein 2	3	0.7536	0.112528	13.394	0.000449842	0.0569949
H3102H09	Mm.10152	Rnaseh1	ribonuclease H1	3	0.5071	0.075781	13.3833	0.000450914	0.0566947
H3093C08	Mm.220984	Rnut1	RNA, U transporter 1	3	0.4494	0.067534	13.3088	0.000458425	0.0572024
H3081C01	Mm.136648	2810411G23Rik	RIKEN cDNA 2810411G23 gene	3	0.3825	0.057481	13.3087	0.000458433	0.0567734
H3024A02	Mm.3616	Polg	polymerase (DNA directed), gamma	3	0.656375	0.099147	13.2404	0.000465463	0.0572138
H3041A09	Mm.25548	Kpna3	karyopherin (importin) alpha 3	3	0.9231	0.139623	13.2228	0.000467309	0.0570151
H3081G08	Mm.12723	Arl4	ADP-ribosylation factor-like 4	3	1.07225	0.162201	13.2212	0.00046747	0.0566155
H3071G05	Mm.292470	AA545217	expressed sequence AA545217	3	0.884525	0.134061	13.1959	0.000470133	0.0565223
H3007G03	Mm.251013	Kpnb1	karyopherin (importin) beta 1	3	0.595175	0.090752	13.1165	0.000478599	0.0571232
H3142B10			EST	3	1.1682	0.178565	13.0843	0.000482089	0.0571258
H3079G07	Mm.12758	Fkbp4	FK506 binding protein 4	3	1.14108	0.174443	13.0825	0.000482291	0.0567415
H3075F06	Mm.26148	1810055E12Rik	RIKEN cDNA 1810055E12 gene	3	0.4233	0.064888	13.0472	0.000486164	0.0567916
H3023B05	Mm.24433	Smt3h1	SMT3 (supressor of mif two, 3) homolog 1 (S. cerevisiae)	3	1.37342	0.211914	12.9621	0.000495667	0.0574938
H3115B05	Mm.99593	BC038058	transcription termination factor, mitochondrial-like	3	0.404	0.062338	12.9615	0.000495729	0.057099
H3016H05	Mm.261027	D19Bwg1357e	DNA segment, Chr 19, Brigham & Women's Genetics 1357 expressed	3	1.27808	0.198825	12.8563	0.000507826	0.0580861
P095	Mm.182931	Paics	phosphoribosylaminoimidazole carboxylase, phosphoribosylaminoribosylaminoimidazole, succinocarboxamide synthetase	3	0.6089	0.094798	12.8463	0.000508992	0.057818
H3001A09			EST	3	0.7621	0.118876	12.8218	0.000511876	0.0577474
H3119B09	Mm.149403	Cyb561	cytochrome b-561	3	1.16758	0.183816	12.7038	0.000526065	0.0589444
H3074C12	Mm.282499	Dutp	deoxyuridine triphosphatase	3	0.4189	0.065977	12.6983	0.000526731	0.0586202
H3039G04	Mm.28688	Sars1	seryl-aminoacyl-tRNA synthetase 1	3	0.881975	0.138987	12.6914	0.000527576	0.0583202
H3055E08	Mm.116862	Mcoln2	mucolipin 2	3	0.5485	0.087109	12.5934	0.000539804	0.0592741
H3016A11	Mm.289841	2810430M08Rik	RIKEN cDNA 2810430M08 gene	3	0.722475	0.114747	12.5925	0.000539928	0.0588951
H3054A06	Mm.127617	D17Ertd441e	DNA segment, Chr 17, ERATO Doi 441, expressed	3	0.5921	0.094285	12.5598	0.00054409	0.0589586
P679	Mm.4802	Hesx1	homeo box gene expressed in ES cells	3	0.1987	0.03176	12.5126	0.000550173	0.0592281
H3098H12	Mm.260716	Epim	epimorphin	3	0.6218	0.099479	12.5011	0.000551667	0.0590033
H3035H07	Mm.24937	1500001M20Rik	RIKEN cDNA 1500001M20 gene	3	1.1896	0.190468	12.4913	0.000552949	0.0587588
H3094H05	Mm.296088	MGC28365	Similar to hypothetical protein BC004409	3	1.07635	0.173866	12.3813	0.000567585	0.0599276
H3152H11	Mm.2998	Nedd1	neural precursor cell expressed, developmentally down-regulated gene 1	3	0.74255	0.120049	12.3708	0.000569015	0.0596959
P857	Mm.58	Itgb7	integrin beta 7	3	1.2957	0.209948	12.3431	0.000572802	0.0597128
H3043B11	Mm.290027	Ncbp2	nuclear cap binding protein subunit 2	3	0.92935	0.150748	12.3299	0.000574611	0.0595247
H3055D11	Mm.263847	Fxyd3	FXYD domain-containing ion transport regulator 3	3	0.359	0.058453	12.2833	0.000581069	0.0598174
H3034E02	Mm.287178	Prps1	phosphoribosyl pyrophosphate synthetase 1	3	1.37015	0.224156	12.225	0.000589295	0.0602875
H3051C09	Mm.229334	Glmr	gp130-like monocyte receptor	3	0.677375	0.111395	12.1616	0.000598402	0.0608412
H3089H07	Mm.221992	Yap	yes-associated protein	3	4.27295	0.707471	12.0795	0.000610493	0.0616897
P096	Mm.289841	2810430M08Rik	RIKEN cDNA 2810430M08 gene	3	0.64265	0.106808	12.0337	0.000617371	0.0620044
H3136B11	Mm.38028	AW553532	expressed sequence AW553532	3	0.52315	0.086952	12.033	0.000617476	0.0616391
H3011A05			EST	3	0.647075	0.108252	11.9549	0.000629458	0.0624566
H3087F06	Mm.281149	BC006933	cDNA sequence BC006933	3	1.65525	0.277401	11.934	0.000632722	0.0624046
H3055H05	Mm.142095	Carhsp1	calcium regulated heat stable protein 1	3	0.55525	0.093129	11.9243	0.000634247	0.0621826
H3006B10	Mm.290026	Cltb	clathrin, light polypeptide (Lcb)	3	0.32775	0.054988	11.9208	0.00063479	0.0618676
H3141C09	Mm.30670	Spnr	spermatid perinuclear RNA binding protein	3	0.84795	0.142438	11.9063	0.000637081	0.0617256
H3096A08			EST	3	0.98505	0.166059	11.8638	0.000643824	0.0620142
H3113D12	Mm.103114	Mlh3	mutL homolog 3 (E coli)	3	0.563175	0.095087	11.8455	0.000646773	0.061936
H3024H12	Mm.290774	Hspa8	heat shock protein 8	3	0.68635	0.116285	11.8046	0.000653399	0.0622088
H3102E12	Mm.138863	Bcap37	B-cell receptor-associated protein 37	3	1.0205	0.173374	11.7722	0.000658711	0.0623542
H3016F01	Mm.272206	Mapkapk5	MAP kinase-activated protein kinase 5	3	0.788475	0.134431	11.7306	0.000665633	0.0626493
H3077F05	Mm.29054	2610529I12Rik	RIKEN cDNA 2610529I12 gene	3	1.20655	0.206298	11.6972	0.000671257	0.0628198
H3054B12	Mm.122705	Nfe2l2	nuclear, factor, erythroid derived 2, like 2	3	0.46175	0.07977	11.577	0.000692005	0.0643956
P657	Mm.4758	Foxd3	forkhead box D3	3	0.774075	0.133906	11.5615	0.000694746	0.0642874
H3125C12			EST	3	0.311325	0.0539	11.5518	0.000696455	0.0640855
H3023F03	Mm.218533	1500016H10Rik	RIKEN cDNA 1500016H10 gene	3	0.292225	0.050651	11.5388	0.00069877	0.0639413
H3122A04	Mm.31808	4930438M06Rik	RIKEN cDNA 4930438M06 gene	3	0.4207	0.072949	11.5341	0.000699609	0.0636644
H3123H12	Mm.58	Itgb7	integrin beta 7	3	1.16795	0.202882	11.5136	0.000703299	0.0636486
H3085C04	Mm.228433	Slc12a2	solute carrier family 12, member 2	3	0.852575	0.148684	11.4683	0.000711521	0.0640408
H3028G10	Mm.29906	Ebna1bp2	EBNA1 binding protein 2	3	0.7269	0.126831	11.4625	0.000712579	0.0637874
T394	Mm.896	Il1r1	interleukin 1 receptor, type I	3	1.31898	0.23057	11.441	0.000716527	0.0637941
H3008E02	Mm.287892	Clpp	caseinolytic protease, ATP-dependent, proteolytic subunit homolog (E. coli)	3	0.43305	0.075954	11.4029	0.000723593	0.0640768
H3008D06			EST	3	0.50185	0.088078	11.3956	0.000724963	0.0638549
H3008G05	Mm.214504	Timm8a	translocase of inner mitochondrial membrane 8 homolog a (yeast)	3	1.76683	0.310116	11.3946	0.000725154	0.063532
H3156A07	Mm.12951	Nme6	expressed in non-metastatic cells 6, protein	3	0.60745	0.106656	11.3909	0.000725856	0.063257
H3037D03	Mm.29536	4933435A13Rik	RIKEN cDNA 4933435A13 gene	3	0.5347	0.094151	11.3584	0.000731988	0.0634557
H3155G09	Mm.21501	0610041L09Rik	RIKEN cDNA 0610041L09 gene	3	1.04668	0.185769	11.2685	0.000749307	0.0646169
H3016E01	Mm.147078	Mipol1	mirror-image polydactyly gene 1 homolog (human)	3	0.9122	0.162343	11.2379	0.00075533	0.0647971
H3044B02	Mm.269857	Slc2a3	solute carrier family 2 (facilitated glucose transporter), member 3	3	1.73053	0.309217	11.193	0.000764304	0.0652272
H3042B07	Mm.277638	D11Ertd707e	DNA segment, Chr 11, ERATO Doi 707, expressed	3	0.3771	0.067589	11.1585	0.000771263	0.0654818
P571	Mm.196728	Abcg2	ATP-binding cassette, sub-family G (WHITE), member 2	3	1.54517	0.277445	11.1386	0.00077533	0.0654896
P272	Mm.16091	Ccl7	chemokine (C-C motif) ligand 7	3	1.78747	0.321998	11.1024	0.000782798	0.065783
H3031A08	Mm.18579	Polr2e	polymerase (RNA) II (DNA directed) polypeptide E	3	0.50635	0.091222	11.1015	0.000782984	0.0654646
P655	Mm.6215	Fosl1	fos-like antigen 1	3	1.79303	0.324016	11.0675	0.00079008	0.0657243
H3002F03	Mm.16479	Dusp9	dual specificity phosphatase 9	3	1.29202	0.233697	11.0573	0.000792236	0.0655725
H3019C10	Mm.263862	Phb	prohibitin	3	0.597875	0.108147	11.0567	0.000792359	0.0652547
H3077H08	Mm.274376	Rdh10	retinol dehydrogenase 10 (all-trans)	3	1.4863	0.268917	11.054	0.00079293	0.0649769
H3027F09	Mm.261045	Ppm1a	protein phosphatase 1A, magnesium dependent, alpha isoform	3	0.640775	0.116112	11.0372	0.00079649	0.0649455
H3095C04	Mm.17526	AU067695	expressed sequence AU067695	3	0.6966	0.126327	11.0285	0.000798329	0.0647747
H3002G11	Mm.89888	Gclc	glutamate-cysteine ligase, catalytic subunit	3	0.97545	0.176915	11.0273	0.000798588	0.0644782
H3094G02	Mm.27660	Rbm12	RNA binding motif protein 12	3	0.212425	0.038565	11.0166	0.000800878	0.0643476
H3062A02	Mm.173494		Mus musculus transcribed sequences	3	0.297225	0.05405	10.9981	0.000804848	0.0643527
H3112E07	Mm.273292	Gli2	GLI-Kruppel family member GLI2	3	1.49517	0.271923	10.997	0.00080507	0.0640595
H3128E08	Mm.157216	C78541	expressed sequence C78541	3	0.6276	0.114332	10.9785	0.000809074	0.0640686
H3058H03	Mm.102097		Mus musculus transcribed sequences	3	0.556575	0.101571	10.9594	0.000813242	0.0640905
H3080C12	Mm.29546	C79802	expressed sequence C79802	3	0.4356	0.079679	10.9338	0.000818836	0.064224
H3100D02	Mm.28765	Tram1	translocating chain-associating membrane protein 1	3	0.970975	0.177725	10.9267	0.000820402	0.0640419
H3091D04	Mm.31267	BC037006	cDNA sequence BC037006	3	1.2826	0.234783	10.9259	0.000820598	0.0637551
H3079F08	Mm.214514	Prelp	proline arginine-rich end leucine-rich repeat	3	1.98117	0.362708	10.9244	0.000820929	0.0634813
H3102H11	Mm.274715	2310045O21Rik	RIKEN cDNA 2310045O21 gene	3	2.83412	0.520664	10.8866	0.000829332	0.0638314
H3006H11	Mm.260009	D13Wsu123e	DNA segment, Chr 13, Wayne State University 123, expressed	3	0.9799	0.180022	10.8865	0.000829357	0.0635365
H3095B11			EST	3	0.44075	0.080977	10.8858	0.000829516	0.0632544
H3027D06	Mm.257917	1110008L16Rik	RIKEN cDNA 1110008L16 gene	3	0.71525	0.13168	10.8635	0.000834528	0.0633433
H3016B12	Mm.3411	Orc2l	origin recognition complex, subunit 2-like (S. cerevisiae)	3	0.934025	0.172055	10.8573	0.000835927	0.0631585
P309	Mm.7275	Ccl25	chemokine (C-C motif) ligand 25	3	0.370775	0.068405	10.8407	0.000839706	0.0631543
H3134E05	Mm.306684		Mus musculus transcribed sequences	3	0.282475	0.052267	10.8089	0.000846986	0.0634123
H3103A05	Mm.4186	Pla2g4a	phospholipase A2, group IVA (cytosolic, calcium-dependent)	3	0.854225	0.158076	10.8078	0.000847236	0.063144
H3125H04	Mm.272024	Mad2l1bp	MAD2L1 binding protein	3	0.495075	0.091763	10.7903	0.000851273	0.0631591
H3055B11	Mm.25429	Nrf1	nuclear respiratory factor 1	3	0.180525	0.033466	10.7885	0.000851709	0.062908
H3098G05	Mm.34871	Idb2	inhibitor of DNA binding 2	3	1.24513	0.231236	10.7693	0.00085617	0.0629553
T260	Mm.196189	Angptl4	angiopoietin-like 4	3	0.695675	0.129232	10.7663	0.000856871	0.0627268
H3005A09	Mm.89888	Gclc	glutamate-cysteine ligase, catalytic subunit	3	1.21665	0.226368	10.7493	0.000860858	0.0627398
H3030A08	Mm.180734	Rpa1	replication protein A1	3	0.61925	0.115686	10.7057	0.000871202	0.0632139
H3016C08	Mm.29131	1110049F12Rik	RIKEN cDNA 1110049F12 gene	3	0.742025	0.138753	10.6956	0.000873625	0.0631118
H3060B06	Mm.281601	Ddx55	DEAD (Asp-Glu-Ala-Asp) box polypeptide 55	3	0.483675	0.090932	10.6382	0.000887557	0.0638382
H3056E08	Mm.3238	Ampd3	AMP deaminase 3	3	0.89195	0.167723	10.636	0.000888087	0.0635986
H3020A07	Mm.22626	Ahsa1	AHA1, activator of heat shock 90kDa protein ATPase homolog 1 (yeast)	3	1.25873	0.237982	10.5783	0.000902387	0.064343
H3001C05	Mm.278783	Ube2v1	ubiquitin-conjugating enzyme E2 variant 1	3	0.324225	0.06133	10.5732	0.000903667	0.0641565
H3023B11	Mm.1777	Hspd1	heat shock protein 1 (chaperonin)	3	0.8109	0.154016	10.5301	0.000914586	0.064653
P894	Mm.35584	Skp2	S-phase kinase-associated protein 2 (p45)	3	0.737125	0.140638	10.4826	0.000926799	0.0652363
H3028E10	Mm.252148	Phgdhl1	phosphoglycerate dehydrogenase like 1	3	0.461925	0.088343	10.4576	0.000933324	0.0654161
H3106G03	Mm.22351	2410018G20Rik	RIKEN cDNA 2410018G20 gene	3	0.550325	0.105254	10.4571	0.000933449	0.0651476
H3014C03	Mm.167671	2810049G06Rik	RIKEN cDNA 2810049G06 gene	3	2.0395	0.390824	10.4369	0.000938756	0.0652416
H3006C04	Mm.22353	1810029F08Rik	RIKEN cDNA 1810029F08 gene	3	0.850325	0.162948	10.4368	0.000938794	0.0649701
H3073D10	Mm.272414	Abhd1	abhydrolase domain containing 1	3	0.915775	0.175815	10.4175	0.000943903	0.0650503
P454	Mm.606	Gata3	GATA binding protein 3	3	0.96675	0.186218	10.383	0.000953135	0.0654129
H3048E05	Mm.271071	Lta4h	leukotriene A4 hydrolase	3	0.95005	0.183018	10.382	0.000953397	0.0651593
H3018G05	Mm.280311	Mki67ip	Mki67 (FHA domain) interacting nucleolar phosphoprotein	3	0.76645	0.148017	10.3563	0.000960376	0.0653651
H3024F07	Mm.41502	Fh1	fumarate hydratase 1	3	0.569625	0.110326	10.3262	0.000968615	0.0656546
H3083D05	Mm.44228	D6Wsu163e	DNA segment, Chr 6, Wayne State University 163, expressed	3	1.24155	0.240804	10.3117	0.00097261	0.0656552
H3006E03	Mm.29196	Cyc1	cytochrome c-1	3	0.9091	0.176483	10.3024	0.000975183	0.0655601
H3023C05	Mm.292040	Nrbp	nuclear receptor binding protein	3	0.409875	0.079822	10.2697	0.000984325	0.0659057
H3158G12	Mm.209941	Mtl5	metallothionein-like 5, testis-specific (tesmin)	3	0.6121	0.119212	10.2691	0.000984495	0.0656503
H3027D12	Mm.33764	Ivns1abp	influenza virus NS1A binding protein	3	1.10278	0.215263	10.2459	0.000991061	0.0658216
H3109F01	Mm.34002	2410015M20Rik	RIKEN cDNA 2410015M20 gene	3	0.54915	0.107198	10.2455	0.000991149	0.0655631
H3022F10	Mm.21873	Ris2	retroviral integration site 2	3	0.629025	0.123127	10.2175	0.000999148	0.0658279
H3049D12	Mm.209292	Rbpsuh	recombining binding protein suppressor of hairless (Drosophila)	3	1.21467	0.237813	10.2154	0.000999757	0.0656056
H3100E05	Mm.173987		Mus musculus transcribed sequences	3	0.665325	0.130608	10.1881	0.00100762	0.065859
H3126G03	Mm.31643	Prkrip1	Prkr interacting protein 1 (IL11 inducible)	3	0.500825	0.098362	10.1833	0.00100901	0.0656893
H3135E12	Mm.263818	Grcc2f	gene rich cluster, C2f gene	3	0.762275	0.150222	10.1486	0.00101916	0.066089
H3022G02	Mm.2462	Psmc2	proteasome (prosome, macropain) 26S subunit, ATPase 2	3	0.4425	0.087223	10.1464	0.00101983	0.0658728
H3030D08			EST	3	1.02262	0.201692	10.1405	0.00102157	0.0657278
H3116F07	Mm.18834	2310058A11Rik	RIKEN cDNA 2310058A11 gene	3	0.868975	0.171881	10.1114	0.00103021	0.0660257
H3127A01	Mm.155583	Il1rl2	interleukin 1 receptor-like 2	3	1.76705	0.349548	10.1105	0.00103048	0.0657867
H3048A01	Mm.46847	4930469P12Rik	RIKEN cDNA 4930469P12 gene	3	0.459025	0.09138	10.0465	0.00104984	0.066764
H3119B10	Mm.288718		Mus musculus adult male cecum cDNA, RIKEN full-length enriched library, clone:9130226F15 product:unknown EST, full insert sequence	3	0.8933	0.178274	10.0216	0.00105748	0.0669916
H3115D05	Mm.301324	9130413I22Rik	RIKEN cDNA 9130413I22 gene	3	0.585725	0.11715	9.99954	0.00106434	0.0671678
H3111G05	Mm.21686	D230016N13Rik	RIKEN cDNA D230016N13 gene	3	0.86725	0.173563	9.9935	0.00106623	0.0670299
H3081B07	Mm.21848	Bzw1	basic leucine zipper and W2 domains 1	3	0.6868	0.13746	9.99272	0.00106647	0.0667905
T374	Mm.245395	Pten	phosphatase and tensin homolog	3	0.498125	0.099782	9.98428	0.00106912	0.0667024
H3006G07	Mm.41372	Vps33a	vacuolar protein sorting 33A (yeast)	3	1.09092	0.218655	9.97852	0.00107092	0.066563
H3069E08			EST	3	0.29115	0.058382	9.974	0.00107235	0.066401
H3005F02	Mm.274690	Hnrpc	heterogeneous nuclear ribonucleoprotein C	3	0.621275	0.124636	9.9694	0.0010738	0.0662417
H3112F06	Mm.247788	Cct2	chaperonin subunit 2 (beta)	3	0.59205	0.119072	9.9444	0.00108173	0.0664818
H3014G04	Mm.27839	D19Ertd721e	DNA segment, Chr 19, ERATO Doi 721, expressed	3	0.75315	0.151546	9.93954	0.00108328	0.0663295
H3095C06	Mm.287548	4933439F18Rik	RIKEN cDNA 4933439F18 gene	3	0.8728	0.175635	9.93877	0.00108352	0.0660988
H3093D02	Mm.259001	Laf4	lymphoid nuclear protein related to AF4	3	3.0519	0.616414	9.90211	0.00109531	0.0665716
H3010H06	Mm.275013	Eif5	eukaryotic translation initiation factor 5	3	0.730725	0.147649	9.89812	0.00109661	0.0664051
H3004G09	Mm.13145	Umps	uridine monophosphate synthetase	3	0.854275	0.172649	9.89606	0.00109727	0.0662021
H3119G03	Mm.262000	Ptp4a1	protein tyrosine phosphatase 4a1	3	0.69895	0.141285	9.89417	0.00109789	0.0659974
H3040G08	Mm.22086	Rnf14	ring finger protein 14	3	0.369975	0.075007	9.86514	0.00110738	0.0663258
H3106C04	Mm.278582		Mus musculus transcribed sequence with weak similarity to protein sp:Q9Y473 (H.sapiens) Z175_HUMAN Zinc finger protein 175 (Zinc finger protein OTK18)	3	1.19385	0.242254	9.8562	0.00111032	0.0662611
H3015H12	Mm.227275	D4Ertd786e	DNA segment, Chr 4, ERATO Doi 786, expressed	3	0.722275	0.146634	9.85143	0.00111189	0.0661155
T331	Mm.126885	Socs5	suppressor of cytokine signaling 5	3	0.90695	0.184158	9.84968	0.00111247	0.0659119
H3023F08	Mm.282158	Cct5	chaperonin subunit 5 (epsilon)	3	0.758375	0.154283	9.83094	0.00111869	0.066043
H3086E12	Mm.281189	9830109N13Rik	RIKEN cDNA 9830109N13 gene	3	0.637625	0.130599	9.76459	0.00114109	0.0671246
H3027A07	Mm.185453	Eif4g2	eukaryotic translation initiation factor 4, gamma 2	3	0.492425	0.101215	9.73028	0.0011529	0.0675782
H3022C08	Mm.1951	Rnps1	ribonucleic acid binding protein S1	3	0.6486	0.133396	9.72441	0.00115494	0.0674576
H3018C09	Mm.292510	Rac1	RAS-related C3 botulinum substrate 1	3	0.4073	0.083834	9.71683	0.00115758	0.0673729
H3084C09	Mm.195770	Myst1	MYST histone acetyltransferase 1	3	0.783575	0.161317	9.71475	0.00115831	0.0671777
H3031E02	Mm.28536	2810410M20Rik	RIKEN cDNA 2810410M20 gene	3	0.387725	0.079972	9.69654	0.00116468	0.0673103
H3149G08	Mm.195451	Gosr2	golgi SNAP receptor complex member 2	3	0.687225	0.141769	9.69496	0.00116524	0.067107
H3048H01	Mm.274690	Hnrpc	heterogeneous nuclear ribonucleoprotein C	3	0.591925	0.122163	9.69071	0.00116673	0.066959
H3105E11	Mm.272568	D5Ertd249e	DNA segment, Chr 5, ERATO Doi 249, expressed	3	0.554425	0.11485	9.65477	0.00117948	0.0674557
P489	Mm.4154	Il10rb	interleukin 10 receptor, beta	3	0.33265	0.069328	9.59642	0.00120058	0.0684248
H3084F02	Mm.168854	D5Wsu178e	DNA segment, Chr 5, Wayne State University 178, expressed	3	1.40308	0.292541	9.59233	0.00120208	0.0682738
H3107G07	Mm.261122	Plekha2	pleckstrin homology domain-containing, family A (phosphoinositide binding specific) member 2	3	0.6999	0.145994	9.58809	0.00120363	0.0681272
H3090B02	Mm.66222	Cxadr	coxsackievirus and adenovirus receptor	3	0.9439	0.197113	9.57727	0.00120761	0.0681185
H3001C06	Mm.29627	5730436H21Rik	RIKEN cDNA 5730436H21 gene	3	1.08005	0.22562	9.57405	0.0012088	0.0679528
H3092E07	Mm.274904	1700003F10Rik	RIKEN cDNA 1700003F10 gene	3	0.491025	0.102711	9.56128	0.00121353	0.0679863
H3049F03	Mm.172888		Mus musculus transcribed sequences	3	0.3004	0.062852	9.55892	0.0012144	0.0678048
H3052H06	Mm.27363	Ppap2b	phosphatidic acid phosphatase type 2B	3	2.37628	0.497441	9.55399	0.00121624	0.0676778
H3069B07	Mm.86453	Aebp2	AE binding protein 2	3	0.77685	0.162788	9.54431	0.00121984	0.06765
H3032B07	Mm.187470	AL024069	expressed sequence AL024069	3	1.21035	0.253777	9.53869	0.00122195	0.0675393
H3004E04	Mm.33764	Ivns1abp	influenza virus NS1A binding protein	3	0.9754	0.204662	9.53182	0.00122452	0.0674552
H3031F10	Mm.211111	2310061O04Rik	RIKEN cDNA 2310061O04 gene	3	1.01075	0.212319	9.52103	0.00122858	0.0674534
H3156G11	Mm.22584	Strap	serine/threonine kinase receptor associated protein	3	0.93815	0.197114	9.51884	0.00122941	0.0672745
H3076A07	Mm.259976	2810031L11Rik	RIKEN cDNA 2810031L11 gene	3	0.5681	0.119433	9.51325	0.00123152	0.067167
T161	Mm.295201	Mapk14	mitogen activated protein kinase 14	3	0.272725	0.057364	9.50863	0.00123327	0.0670404
H3011D02	Mm.3555	Vdac1	voltage-dependent anion channel 1	3	0.156	0.032823	9.50563	0.00123441	0.0668816
H3015E03	Mm.299003	Pbp	phosphatidylethanolamine binding protein	3	0.913925	0.192633	9.48878	0.00124083	0.0670089
H3087H08	Mm.276407	E430025E21Rik	RIKEN cDNA E430025E21 gene	3	0.5292	0.111745	9.47158	0.00124743	0.0671449
H3159D12	Mm.247837	AW559096	expressed sequence AW559096	3	0.4177	0.088284	9.4626	0.00125089	0.067112
H3077D10	Mm.268148	BC026590	cDNA sequence BC026590	3	0.2265	0.047909	9.45542	0.00125366	0.0670425
H3025F01	Mm.33653	Wnt2	wingless-related MMTV integration site 2	3	0.396575	0.083949	9.44802	0.00125653	0.0669786
H3076F03	Mm.43212	D7Ertd743e	DNA segment, Chr 7, ERATO Doi 743, expressed	3	0.89355	0.18956	9.42761	0.0012645	0.0671857
H3091G06	Mm.27223	C230060M08Rik	RIKEN cDNA C230060M08 gene	3	0.541875	0.11539	9.39205	0.00127854	0.0677132
H3018A01			EST	3	0.5063	0.107846	9.38933	0.00127962	0.0675533
H3007F05	Mm.4595	Fbl	fibrillarin	3	1.20585	0.256898	9.38777	0.00128024	0.0673701
P127	Mm.29798	Cd34	CD34 antigen	3	1.06585	0.227074	9.3877	0.00128027	0.067157
H3097F06	Mm.292056	Facl5	fatty acid Coenzyme A ligase, long chain 5	3	0.488	0.10413	9.37286	0.0012862	0.0672539
H3095A07			EST	3	0.6816	0.14552	9.3678	0.00128823	0.0671469
H3158H03	Mm.213292	D16Wsu109e	DNA segment, Chr 16, Wayne State University 109, expressed	3	0.72645	0.155629	9.33564	0.00130123	0.0676107
H3128D11	Mm.100380		Mus musculus, clone IMAGE:3371882, mRNA, partial cds	3	1.11395	0.238714	9.33292	0.00130234	0.0674553
H3078G06	Mm.281245		Mus musculus transcribed sequence with strong similarity to protein ref:NP_077795.1 (M.musculus) hypothetical protein, MGC: 7513; hypothetical protein MGC7513 [Mus musculus]	3	0.827525	0.178053	9.29527	0.0013178	0.0680422
H3041E08	Mm.27662	1500011H22Rik	RIKEN cDNA 1500011H22 gene	3	0.39025	0.084105	9.28008	0.00132411	0.0681543
H3114E06	Mm.14455	Tgfbi	transforming growth factor, beta induced	3	2.54197	0.547859	9.27966	0.00132428	0.0679508
H3093H02	Mm.129136	2610024G14Rik	RIKEN cDNA 2610024G14 gene	3	0.529225	0.114442	9.24877	0.00133723	0.0684023
H3011F08	Mm.249333	1300002F13Rik	RIKEN cDNA 1300002F13 gene	3	1.72562	0.373241	9.24671	0.0013381	0.0682348
H3031C07	Mm.259548	8430406I07Rik	RIKEN cDNA 8430406I07 gene	3	0.6462	0.139831	9.24259	0.00133985	0.0681129
H3076F01	Mm.29872	Pdzk2	PDZ domain containing 2	3	0.4235	0.091729	9.23372	0.0013436	0.0680939
H3050B02	Mm.172901		Mus musculus transcribed sequences	3	0.28385	0.061519	9.2281	0.00134599	0.0680055
H3042G04	Mm.5791		Mus musculus transcribed sequences	3	0.307225	0.066644	9.2199	0.00134949	0.0679738
H3034H06	Mm.2103	Ccng1	cyclin G1	3	0.508225	0.110455	9.20242	0.00135698	0.0681429
H3036C08			EST	3	0.4872	0.105921	9.19929	0.00135833	0.0680032
H3102E09	Mm.18359		Mus musculus transcribed sequence with moderate similarity to protein ref:NP_004955.2 (H.sapiens) histone deacetylase 1; reduced potassium dependency, yeast homolog-like 1 [Homo sapiens]	3	2.0867	0.453977	9.19297	0.00136105	0.0679331
H3105B01	Mm.18652	Sms	spermine synthase	3	0.6209	0.135166	9.18721	0.00136355	0.067852
H3115D07	Mm.957	Cops4	COP9 (constitutive photomorphogenic) homolog, subunit 4 (Arabidopsis thaliana)	3	0.573325	0.124905	9.18015	0.00136661	0.0677993
H3021C05	Mm.275554	1100001D10Rik	RIKEN cDNA 1100001D10 gene	3	0.51715	0.11274	9.17417	0.00136921	0.0677245
H3009C02	Mm.86564	AA591032	expressed sequence AA591032	3	0.5682	0.123919	9.17054	0.00137079	0.0675997
H3082G11	Mm.269272	Pabpc4	poly A binding protein, cytoplasmic 4	3	0.4453	0.097211	9.16153	0.00137472	0.0675913
H3114A10	Mm.272536	3110024A21Rik	RIKEN cDNA 3110024A21 gene	3	0.5273	0.115166	9.15722	0.00137661	0.0674827
H3047E09	Mm.275894	E430019N21Rik	RIKEN cDNA E430019N21 gene	3	0.3268	0.071596	9.12895	0.00138908	0.067892
H3049D04	Mm.29473	Copz1	coatomer protein complex, subunit zeta 1	3	0.349025	0.076619	9.11061	0.00139726	0.0680894
H3019A10	Mm.29974	Mrpl38	mitochondrial ribosomal protein L38	3	0.640125	0.141186	9.0678	0.00141657	0.0688271
H3012C09	Mm.30195	Gps1	G protein pathway suppressor 1	3	0.526825	0.116255	9.06326	0.00141865	0.0687251
H3019B08	Mm.137746	AI853514	expressed sequence AI853514	3	0.57295	0.126519	9.05715	0.00142144	0.0686584
H3023G06	Mm.2941	Mttp	microsomal triglyceride transfer protein	3	0.96125	0.212557	9.04463	0.00142718	0.0687341
H3005D10	Mm.134093	Sema3e	sema domain, immunoglobulin domain (Ig), short basic domain, secreted, (semaphorin) 3E	3	0.850025	0.188123	9.03691	0.00143074	0.0687047
H3042D04	Mm.84203	1810042K04Rik	RIKEN cDNA 1810042K04 gene	3	0.71015	0.157205	9.03468	0.00143177	0.0685543
H3016E07	Mm.29061	Rrs1	RRS1 ribosome biogenesis regulator homolog (S. cerevisiae)	3	1.21315	0.268689	9.03013	0.00143387	0.0684559
H3148B05	Mm.87312	Gmfb	glia maturation factor, beta	3	0.799725	0.177874	8.99204	0.00145165	0.0691042
H3042A07	Mm.293517	Sdf4	stromal cell derived factor 4	3	0.613025	0.136625	8.97385	0.00146023	0.0693128
H3114A08	Mm.262037	Eif1a	eukaryotic translation initiation factor 1A	3	0.3955	0.088189	8.96937	0.00146236	0.0692142
T009	Mm.34775	Pdha1	pyruvate dehydrogenase E1 alpha 1	3	0.753875	0.168412	8.95274	0.00147029	0.0693902
H3065D02			EST	3	1.0786	0.240971	8.95212	0.00147058	0.0692057
H3020G02	Mm.9550	Lass5	longevity assurance homolog 5 (S. cerevisiae)	3	0.673025	0.15104	8.9119	0.00149	0.0699197
H3030D07			EST	3	0.33865	0.076045	8.90655	0.00149261	0.0698432
H3055A12	Mm.30929	Prdx1	peroxiredoxin 1	3	0.588775	0.132679	8.87518	0.00150802	0.0703645
H3019B04	Mm.29803	Aldh9a1	aldehyde dehydrogenase 9, subfamily A1	3	1.0314	0.232663	8.86605	0.00151255	0.0703763
H3094C10			EST	3	0.345325	0.077902	8.86565	0.00151275	0.0701873
H3051D07	Mm.22363	Rarsl	arginyl-tRNA synthetase-like	3	0.38775	0.087534	8.85941	0.00151586	0.0701339
H3013E02	Mm.28057	1110064N10Rik	RIKEN cDNA 1110064N10 gene	3	0.468325	0.105769	8.8556	0.00151775	0.0700249
H3083E05	Mm.291539		Mus musculus transcribed sequence with moderate similarity to protein pir:S12207 (M.musculus) S12207 hypothetical protein (B2 element) - mouse	3	0.465825	0.105242	8.85249	0.00151931	0.0699009
H3071B12	Mm.174044	2700050L05Rik	RIKEN cDNA 2700050L05 gene	3	0.439875	0.099491	8.84251	0.0015243	0.0699354
H3155B05	Mm.21173	2310015N07Rik	RIKEN cDNA 2310015N07 gene	3	0.7098	0.160708	8.83343	0.00152887	0.06995
H3121A04	Mm.241931	Ppp1cb	protein phosphatase 1, catalytic subunit, beta isoform	3	0.509175	0.115357	8.82779	0.00153171	0.069886
H3079B08	Mm.121549	Dctd	dCMP deaminase	3	1.06705	0.241759	8.82738	0.00153192	0.0697025
H3065B12	Mm.3256	Ap3m1	adaptor-related protein complex 3, mu 1 subunit	3	0.695575	0.157903	8.81018	0.00154064	0.0699061
H3023F07	Mm.282158	Cct5	chaperonin subunit 5 (epsilon)	3	0.65795	0.149523	8.80068	0.00154549	0.0699333
H3146B10	Mm.267405	Bcat2	branched chain aminotransferase 2, mitochondrial	3	0.361425	0.082179	8.79607	0.00154785	0.0698482
H3123C06	Mm.274376	Rdh10	retinol dehydrogenase 10 (all-trans)	3	1.4577	0.331452	8.79586	0.00154796	0.0696622
H3005D08	Mm.18834	2310058A11Rik	RIKEN cDNA 2310058A11 gene	3	0.618725	0.140761	8.79117	0.00155036	0.0695802
H3116H10	Mm.155708	Etv5	ets variant gene 5	3	0.67555	0.153933	8.77722	0.00155754	0.0697126
H3121F06	Mm.294882	F11r	F11 receptor	3	1.41958	0.32356	8.77472	0.00155883	0.0695813
H3054H02	Mm.289667		Mus musculus adult male testis cDNA, RIKEN full-length enriched library, clone:4933407G20 product:unclassifiable, full insert sequence	3	0.5772	0.131564	8.77441	0.00155899	0.0694004
H3131D12	Mm.283293	2310075C12Rik	RIKEN cDNA 2310075C12 gene	3	4.0988	0.935573	8.76211	0.00156537	0.0694963
H3010A06	Mm.19091	D19Wsu55e	DNA segment, Chr 19, Wayne State University 55, expressed	3	0.34185	0.078068	8.75771	0.00156766	0.069411
H3076D01	Mm.264266	3110023B02Rik	RIKEN cDNA 3110023B02 gene	3	0.9717	0.222522	8.73353	0.00158032	0.0697839
H3064F09	Mm.21482	Clns1a	chloride channel, nucleotide-sensitive, 1A	3	0.809575	0.185431	8.73183	0.00158121	0.0696368
H3097B03	Mm.234608	Slc11a2	solute carrier family 11 (proton-coupled divalent metal ion transporters), member 2	3	1.11985	0.256978	8.71554	0.00158982	0.0698292
H3016A02	Mm.368	Psmb4	proteasome (prosome, macropain) subunit, beta type 4	3	0.282025	0.064778	8.70749	0.0015941	0.0698309
H3126E05	Mm.26135	Cab39	calcium binding protein 39	3	0.760975	0.174842	8.7047	0.00159559	0.0697107
H3020B07	Mm.290407	Nap1l1	nucleosome assembly protein 1-like 1	3	0.62985	0.144845	8.69686	0.00159978	0.0697088
H3105C02	Mm.204656	4732473B16Rik	RIKEN cDNA 4732473B16 gene	3	0.8125	0.188713	8.61094	0.00164662	0.0715608
H3027G07	Mm.167827	Cdv3	carnitine deficiency-associated gene expressed in ventricle 3	3	0.4338	0.100947	8.5946	0.00165574	0.0717677
H3025E08	Mm.89341	Hsp70-4	heat shock protein 4	3	1.25025	0.292673	8.54366	0.00168459	0.0728265
P086	Mm.21535	Grpel1	GrpE-like 1, mitochondrial	3	0.5726	0.134375	8.52241	0.00169682	0.0731631
H3025E03	Mm.154378	Ncl	nucleolin	3	0.440425	0.10338	8.52048	0.00169794	0.0730203
H3076D10	Mm.2444	Myc	myelocytomatosis oncogene	3	1.2934	0.303852	8.51335	0.00170207	0.0730074
P396	Mm.2611	Otc	ornithine transcarbamylase	3	0.410375	0.096515	8.50382	0.00170762	0.073055
T430	Mm.209292	Rbpsuh	recombining binding protein suppressor of hairless (Drosophila)	3	1.213	0.285728	8.49059	0.00171535	0.0731959
H3007A11	Mm.139166	AF155546	cDNA sequence AF155546	3	0.931225	0.219802	8.4733	0.00172554	0.0734401
H3011B06	Mm.173438	Ipo7	importin 7	3	0.856425	0.202495	8.45874	0.00173418	0.0736176
H3089H02	Mm.7978	Efna5	ephrin A5	3	0.90155	0.213397	8.44951	0.00173968	0.0736614
H3091H07	Mm.154427	Dio3	deiodinase, iodothyronine type III	3	1.5657	0.371238	8.43502	0.00174837	0.0738394
H3048D11			EST	3	1.02255	0.24289	8.41987	0.00175752	0.0740359
H3004D03	Mm.286449	Tcf3	transcription factor 3	3	0.31885	0.075745	8.41898	0.00175805	0.0738696
H3125B10	Mm.21444	1110003H09Rik	RIKEN cDNA 1110003H09 gene	3	0.677825	0.161229	8.40824	0.00176458	0.0739552
H3122H03	Mm.28124	Gfer	growth factor, erv1 (S. cerevisiae)-like (augmenter of liver regeneration)	3	0.6523	0.155196	8.40616	0.00176585	0.0738204
H3031C09	Mm.27063	Trip6	thyroid hormone receptor interactor 6	3	0.50495	0.12026	8.39764	0.00177105	0.0738506
H3069A07	Mm.22670	Mdm2	transformed mouse 3T3 cell double minute 2	3	0.58125	0.13866	8.38381	0.00177954	0.0740173
H3022A10	Mm.23697	Phlda2	pleckstrin homology-like domain, family A, member 2	3	0.465	0.110935	8.3833	0.00177986	0.073844
H3100D01	Mm.173324	Tm7sf3	transmembrane 7 superfamily member 3	3	1.0734	0.256108	8.3824	0.00178041	0.0736812
H3021F11	Mm.25794	Fbxl5	F-box and leucine-rich repeat protein 5	3	0.715	0.170616	8.38138	0.00178104	0.0735225
H3144C08	Mm.236449	Rnf34	ring finger protein 34	3	0.8515	0.203392	8.373	0.00178622	0.0735519
H3040E06	Mm.157190	Hmga2	high mobility group AT-hook 2	3	1.1598	0.277035	8.37294	0.00178625	0.0733701
H3056G09	Mm.261532	Sfmbt1	Scm-like with four mbt domains 1	3	0.552675	0.132024	8.37233	0.00178663	0.073203
H3121D12	Mm.25856		Mus musculus similar to general transcription factor IIIC, polypeptide 3, 102kDa; general transcription factor IIIC, polypeptide 3 (102kD); transcription factor IIIC, 102 kD (LOC227109), mRNA	3	0.68145	0.162847	8.36922	0.00178856	0.0731002
H3090E01	Mm.249328	Wdr5	WD repeat domain 5	3	0.585525	0.140288	8.34747	0.00180211	0.0734717
H3126H04	Mm.247762	2610301D06Rik	RIKEN cDNA 2610301D06 gene	3	0.583625	0.139892	8.34396	0.00180431	0.0733799
H3029A02	Mm.37249	Shyc	selective hybridizing clone	3	0.1593	0.038203	8.33959	0.00180705	0.0733103
H3099G02			EST	3	0.4436	0.106458	8.3338	0.0018107	0.0732777
H3060C10	Mm.274158	2410005C22Rik	RIKEN cDNA 2410005C22 gene	3	1.27673	0.307113	8.31438	0.00182299	0.0735944
P771	Mm.89982	Spry2	sprouty homolog 2 (Drosophila)	3	0.47315	0.113918	8.30682	0.0018278	0.0736082
H3081H02	Mm.27447	Akr1c13	aldo-keto reductase family 1, member C13	3	2.6999	0.650571	8.3001	0.0018321	0.0736013
H3016B05	Mm.276784	Adss2	adenylosuccinate synthetase 2, non muscle	3	0.837	0.20185	8.29327	0.00183648	0.0735978
H3071A06	Mm.18972	2410174K12Rik	RIKEN cDNA 2410174K12 gene	3	0.3877	0.093561	8.28764	0.0018401	0.0735637
H3011D09	Mm.30072	Cox7a2l	cytochrome c oxidase subunit VIIa polypeptide 2-like	3	0.647275	0.156256	8.28483	0.00184191	0.0734579
H3015E02	Mm.245513	Braf	Braf transforming gene	3	0.435425	0.105139	8.28283	0.0018432	0.0733317
H3106F04			EST	3	0.460425	0.111584	8.25252	0.00186289	0.0739366
H3048H10			EST	3	1.04505	0.253294	8.25167	0.00186345	0.073781
P041	Mm.444	Idb1	inhibitor of DNA binding 1	3	0.896325	0.217956	8.22482	0.00188113	0.0743024
H3111H07	Mm.207263	Lypla1	lysophospholipase 1	3	0.3121	0.076028	8.21018	0.00189087	0.0745084
H3003E12	Mm.175403	Arl6ip2	ADP-ribosylation factor-like 6 interacting protein 2	3	0.55335	0.13488	8.2051	0.00189426	0.074464
H3008H02			EST	3	0.315625	0.076963	8.20195	0.00189637	0.0743694
H3003B08	Mm.213873	Itgb4	integrin beta 4	3	0.50445	0.123044	8.19952	0.001898	0.0742564
P824	Mm.87787	Lta	lymphotoxin A	3	0.413125	0.100846	8.19322	0.00190223	0.0742458
H3031F11	Mm.993	Dhx15	DEAH (Asp-Glu-Ala-His) box polypeptide 15	3	0.426575	0.104225	8.18564	0.00190734	0.074269
H3058B08	Mm.296240	2310037I24Rik	RIKEN cDNA 2310037I24 gene	3	0.7056	0.172516	8.18012	0.00191107	0.0742388
H3105C08	Mm.28489	AA673511	expressed sequence AA673511	3	0.626825	0.153493	8.1675	0.00191964	0.0743961
H3075B10	Mm.29476	2810404F18Rik	RIKEN cDNA 2810404F18 gene	3	0.71655	0.175474	8.16701	0.00191997	0.0742342
H3075D07	Mm.250025		Mus musculus transcribed sequences	3	0.23305	0.057083	8.16535	0.0019211	0.074104
P938	Mm.42195	Ruvbl1	RuvB-like protein 1	3	0.683275	0.167389	8.1639	0.00192209	0.073969
H3012D06	Mm.228	Homer2	homer homolog 2 (Drosophila)	3	1.09675	0.269279	8.14584	0.00193446	0.0742715
H3031G03	Mm.260335	Pknox2	Pbx/knotted 1 homeobox 2	3	0.919375	0.225968	8.13722	0.0019404	0.0743263
H3105B07	Mm.29622	2410003C20Rik	RIKEN cDNA 2410003C20 gene	3	0.3925	0.096582	8.12782	0.0019469	0.0744022
T431	Mm.25003	Fgf10	fibroblast growth factor 10	3	0.599975	0.148003	8.1076	0.00196099	0.0747673
T071	Mm.225505	Chk	choline kinase	3	0.595625	0.146988	8.1044	0.00196324	0.0746801
H3129C08	Mm.21175	AW552001	expressed sequence AW552001	3	0.661325	0.163281	8.10046	0.001966	0.0746128
H3024E10	Mm.33124	Metap1	methionyl aminopeptidase 1	3	0.572075	0.141565	8.08216	0.00197892	0.0749304
H3121D04	Mm.23258	1110031N17Rik	RIKEN cDNA 1110031N17 gene	3	0.44435	0.110781	8.02213	0.00202207	0.0763888
H3097F08	Mm.12193	MGC6735	Similar to 60S ribosomal protein L30 isolog	3	0.632625	0.158309	7.99227	0.00204399	0.0770404
H3159B02	Mm.185885	Glce	glucuronyl C5-epimerase	3	0.782775	0.195973	7.98861	0.00204671	0.0769665
H3078F07	Mm.294985	1810029B16Rik	RIKEN cDNA 1810029B16 gene	3	0.347375	0.087129	7.97377	0.00205774	0.0772051
H3127D07	Mm.41736		Mus musculus 12 days embryo head cDNA, RIKEN full-length enriched library, clone:3000002J10 product:unknown EST, full insert sequence	3	0.413675	0.10377	7.97292	0.00205838	0.0770535
H3076H04	Mm.24094	Dirc2	disrupted in renal carcinoma 2 (human)	3	0.47175	0.118385	7.96979	0.00206071	0.076966
P348	Mm.277812	Vil2	villin 2	3	1.28567	0.323576	7.94667	0.00207809	0.0774395
T146	Mm.6670	Prkag1	protein kinase, AMP-activated, gamma 1 non-catalytic subunit	3	0.997	0.250947	7.94591	0.00207867	0.0772861
H3006C10	Mm.291802	Rpl18	ribosomal protein L18	3	0.484075	0.122288	7.91698	0.0021007	0.0779293
H3105C06	Mm.157389		Mus musculus transcribed sequences	3	0.1365	0.034519	7.90878	0.002107	0.0779874
H3079H04	Mm.136648	2810411G23Rik	RIKEN cDNA 2810411G23 gene	3	0.402125	0.101695	7.90845	0.00210725	0.0778219
H3118F05	Mm.157190	Hmga2	high mobility group AT-hook 2	3	1.02095	0.25827	7.90606	0.00210909	0.0777156
H3098E11	Mm.247788	Cct2	chaperonin subunit 2 (beta)	3	0.4951	0.125256	7.90543	0.00210958	0.0775602
H3101F12	Mm.29087	2510009N07Rik	RIKEN cDNA 2510009N07 gene	3	0.6899	0.174686	7.89876	0.00211473	0.0775763
H3012E03	Mm.286226	1500002M01Rik	RIKEN cDNA 1500002M01 gene	3	0.4799	0.121822	7.87873	0.0021303	0.0779739
H3081H07	Mm.28354	2010305A19Rik	RIKEN cDNA 2010305A19 gene	3	0.476875	0.121141	7.87306	0.00213474	0.0779629
H3111F07			EST	3	0.286125	0.072714	7.86982	0.00213728	0.077883
H3086B03	Mm.173228		Mus musculus transcribed sequences	3	0.28775	0.073237	7.85809	0.00214651	0.0780467
H3028A02	Mm.295181	Sca2	spinocerebellar ataxia 2 homolog (human)	3	0.27435	0.069964	7.84258	0.0021588	0.0783205
H3038E03	Mm.46856	Pawr	PRKC, apoptosis, WT1, regulator	3	1.72657	0.440453	7.84	0.00216084	0.0782225
H3159E05	Mm.215115	5031409G22Rik	RIKEN cDNA 5031409G22 gene	3	1.17942	0.301212	7.83119	0.00216787	0.0783048
H3120C05	Mm.285783	2210409M21Rik	RIKEN cDNA 2210409M21 gene	3	0.679075	0.173972	7.80671	0.00218756	0.0788432
H3092C09	Mm.72140	Zdhhc6	zinc finger, DHHC domain containing 6	3	1.18385	0.303962	7.78946	0.00220158	0.0791751
H3140E07	Mm.274215	2410017P07Rik	RIKEN cDNA 2410017P07 gene	3	0.2235	0.057442	7.78179	0.00220784	0.0792274
H3100E04	Mm.2026	Birc2	baculoviral IAP repeat-containing 2	3	4.04415	1.03955	7.78056	0.00220885	0.0790913
P557	Mm.5165	Dlx4	distal-less homeobox 4	3	0.6185	0.159476	7.75667	0.00222854	0.0796231
H3064D08	Mm.288805	AV216087	expressed sequence AV216087	3	0.982725	0.253467	7.75425	0.00223055	0.0795224
H3035A10	Mm.195451	Gosr2	golgi SNAP receptor complex member 2	3	0.35805	0.092442	7.74646	0.00223703	0.0795813
P442	Mm.4573	Frat1	frequently rearranged in advanced T-cell lymphomas	3	0.845425	0.218293	7.74578	0.00223759	0.0794298
H3102G11	Mm.249809	Mrps17	mitochondrial ribosomal protein S17	3	0.481075	0.124273	7.7422	0.00224058	0.0793646
H3049A08			EST	3	0.826375	0.213725	7.73306	0.00224823	0.0794648
H3097F05	Mm.200912	Prkab1	protein kinase, AMP-activated, beta 1 non-catalytic subunit	3	0.79355	0.205458	7.72469	0.00225526	0.0795427
H3005B08			EST	3	1.08977	0.282835	7.70609	0.00227101	0.0799268
H3003F06	Mm.10600	Glud	glutamate dehydrogenase	3	0.40485	0.10519	7.69751	0.00227831	0.080013
H3037G10	Mm.309002		Mus musculus transcribed sequences	3	0.296075	0.076982	7.6921	0.00228293	0.0800046
H3052G06	Mm.195373		Mus musculus transcribed sequence with weak similarity to protein pir:A35836 (H.sapiens) A35836 L-plastin - human	3	0.8552	0.222401	7.69061	0.00228421	0.0798796
H3073H04	Mm.250022		Mus musculus transcribed sequence with weak similarity to protein ref:NP_081764.1 (M.musculus) RIKEN cDNA 5730493B19 [Mus musculus]	3	0.39705	0.103463	7.6752	0.00229746	0.0801725
H3040A06			EST	3	0.334475	0.08718	7.6732	0.00229919	0.0800634
H3100E01	Mm.275803	4632412I24Rik	RIKEN cDNA 4632412I24 gene	3	0.55245	0.144162	7.66431	0.00230689	0.080162
H3117H04	Mm.300118		Mus musculus transcribed sequence with strong similarity to protein sp:P12268 (H.sapiens) IMD2_HUMAN Inosine-5'-monophosphate dehydrogenase 2 (IMP dehydrogenase 2) (IMPDH-II) (IMPD 2)	3	0.952425	0.248557	7.66362	0.00230748	0.0800138
H3149C01			EST	3	1.11163	0.290693	7.64811	0.002321	0.0803134
H3154C04	Mm.23879	Sbno1	sno, strawberry notch homolog 1 (Drosophila)	3	0.45575	0.119222	7.64541	0.00232336	0.0802267
H3023D04	Mm.247985	4930471M23Rik	RIKEN cDNA 4930471M23 gene	3	0.7415	0.194023	7.64343	0.0023251	0.0801186
H3043E11	Mm.34199	3300001M20Rik	RIKEN cDNA 3300001M20 gene	3	0.4787	0.125326	7.63927	0.00232875	0.0800769
H3113C08	Mm.88763	0910001K20Rik	RIKEN cDNA 0910001K20 gene	3	0.945825	0.247674	7.63767	0.00233015	0.0799582
P079	Mm.18714	Pxn	paxillin	3	0.765875	0.200632	7.63463	0.00233283	0.0798838
H3035E03	Mm.6419	BC004044	cDNA sequence BC004044	3	0.971625	0.254566	7.63359	0.00233374	0.0797492
H3008D02	Mm.210048	2610511E03Rik	RIKEN cDNA 2610511E03 gene	3	1.08145	0.283347	7.6334	0.00233391	0.0795899
H3049G02	Mm.9086	Slc16a1	solute carrier family 16 (monocarboxylic acid transporters), member 1	3	1.04695	0.274718	7.62199	0.002344	0.0797687
H3157E10	Mm.38526	1100001I19Rik	RIKEN cDNA 1100001I19 gene	3	0.450925	0.118546	7.60763	0.00235678	0.080038
H3058E05	Mm.215110	Actr8	ARP8 actin-related protein 8 homolog (S. cerevisiae)	3	0.1116	0.029371	7.59943	0.0023641	0.0801218
H3121B06	Mm.29105	Gtf3a	general transcription factor III A	3	0.832825	0.219291	7.59561	0.00236753	0.0800732
H3090G11	Mm.25549	1700016A15Rik	RIKEN cDNA 1700016A15 gene	3	0.5469	0.14508	7.53931	0.00241881	0.0816398
H3033G03	Mm.12758	Fkbp4	FK506 binding protein 4	3	1.2269	0.327767	7.48642	0.00246833	0.0831409
H3148E12	Mm.39739	Hspa12a	heat shock 70kDa protein 12A	3	1.21788	0.325594	7.48094	0.00247354	0.0831462
H3038E12			EST	3	0.196925	0.052654	7.47994	0.00247449	0.0830087
H3083E07	Mm.276510	Sdccag33l	serologically defined colon cancer antigen 33 like	3	0.282975	0.075714	7.47487	0.00247932	0.0830017
H3043C01	Mm.290677		Mus musculus similar to Probable cation-transporting ATPase 3 (ATPase family homolog up-regulated in senescence cells 1) (LOC224087), mRNA	3	0.635125	0.170042	7.4702	0.00248378	0.0829825
H3002G08	Mm.301320	Rpl37	ribosomal protein L37	3	0.351525	0.094186	7.46449	0.00248925	0.0829968
P080	Mm.294007	Pace4	paired basic amino acid cleaving system 4	3	1.31252	0.351881	7.46005	0.00249352	0.0829711
H3101D09	Mm.29131	1110049F12Rik	RIKEN cDNA 1110049F12 gene	3	1.00683	0.270029	7.45717	0.00249628	0.0828957
H3031B02	Mm.31227	Agps	alkylglycerone phosphate synthase	3	0.577875	0.155166	7.44848	0.00250467	0.083007
H3019D11			EST	3	0.812975	0.218349	7.44657	0.00250652	0.0829015
H3041C08	Mm.26789	Csnk2b	casein kinase II, beta subunit	3	0.200225	0.053824	7.43998	0.00251291	0.0829463
H3056H07	Mm.329524		Mus musculus transcribed sequences	3	0.410125	0.110402	7.42968	0.00252294	0.0831108
H3005G12	Mm.291445	Mars	methionine-tRNA synthetase	3	0.686475	0.184824	7.42843	0.00252417	0.0829851
H3020C10	Mm.197229		Mus musculus transcribed sequences	3	0.351025	0.094533	7.42653	0.00252602	0.0828808
H3134F06	Mm.29027	Sparcl1	SPARC-like 1 (mast9, hevin)	3	1.75172	0.471773	7.42614	0.00252641	0.0827287
H3026B03	Mm.182927	Mrpl15	mitochondrial ribosomal protein L15	3	0.73245	0.197295	7.42492	0.0025276	0.0826032
H3049E04	Mm.606	Gata3	GATA binding protein 3	3	1.00782	0.271621	7.42082	0.00253161	0.0825707
H3137E05	Mm.280149	Tm6sf1	transmembrane 6 superfamily member 1	3	0.7333	0.19769	7.4187	0.0025337	0.0824754
H3025F12			EST	3	0.996025	0.268623	7.4158	0.00253655	0.0824055
H3049E03	Mm.266312	Zrf2	zuotin related factor 2	3	0.813475	0.219735	7.40416	0.00254803	0.0826154
H3029G04	Mm.279985	Gemin6	gem (nuclear organelle) associated protein 6	3	0.768925	0.207708	7.4039	0.00254829	0.0824613
H3154H10	Mm.295031	Ddx27	DEAD (Asp-Glu-Ala-Asp) box polypeptide 27	3	0.385975	0.104402	7.394	0.00255811	0.082617
H3122D07	Mm.209419	Hspa9a	heat shock protein, A	3	0.644075	0.174274	7.39151	0.00256059	0.0825351
H3074A02	Mm.2026	Birc2	baculoviral IAP repeat-containing 2	3	4.01705	1.08719	7.3898	0.0025623	0.0824289
H3021D08	Mm.4449	D2Wsu81e	DNA segment, Chr 2, Wayne State University 81, expressed	3	0.589775	0.15964	7.38879	0.0025633	0.0823004
H3117A03	Mm.180063	0610038F07Rik	RIKEN cDNA 0610038F07 gene	3	0.5029	0.13669	7.35825	0.00259399	0.0831238
H3111F02	Mm.235040	4931433A13	hypothetical protein 4931433A13	3	0.369275	0.100442	7.35298	0.00259934	0.0831334
H3084G07	Mm.12193	MGC6735	Similar to 60S ribosomal protein L30 isolog	3	0.466175	0.126826	7.35143	0.00260092	0.0830228
H3029B10	Mm.272541	2410002O22Rik	RIKEN cDNA 2410002O22 gene	3	0.692375	0.188738	7.3369	0.00261575	0.0833345
H3008E09	Mm.291523	Ddx18	DEAD (Asp-Glu-Ala-Asp) box polypeptide 18	3	0.654	0.178356	7.33363	0.0026191	0.0832802
H3114B06			EST	3	0.52995	0.144652	7.32726	0.00262564	0.0833274
H3068B01	Mm.173633		Mus musculus transcribed sequences	3	0.4521	0.123538	7.31921	0.00263395	0.0834303
H3011H12	Mm.28765	Tram1	translocating chain-associating membrane protein 1	3	0.48865	0.133565	7.31706	0.00263617	0.0833403
H3141G04	Mm.9244	Suv39h1	suppressor of variegation 3-9 homolog 1 (Drosophila)	3	0.546225	0.149439	7.31036	0.00264312	0.0833999
H3018H12	Mm.27143	Neto2	neuropilin (NRP) and tolloid (TLL)-like 2	3	1.07415	0.293936	7.30874	0.0026448	0.0832936
H3159B09			EST	3	0.4171	0.114165	7.30699	0.00264661	0.0831915
H3007G09	Mm.231400	1500003O22Rik	RIKEN cDNA 1500003O22 gene	3	0.8992	0.246481	7.29629	0.00265777	0.0833832
H3047C09	Mm.197960	4933425A18Rik	RIKEN cDNA 4933425A18 gene	3	0.3773	0.103999	7.25585	0.00270053	0.0845635
H3055E06	Mm.29200	2310006I24Rik	RIKEN cDNA 2310006I24 gene	3	0.44275	0.122052	7.25508	0.00270135	0.0844286
H3143A04			EST	3	0.55625	0.153668	7.23961	0.00271795	0.0847865
H3081B06	Mm.26246	C130031J23	hypothetical protein C130031J23	3	0.5965	0.165007	7.23001	0.00272832	0.0849492
H3034A11	Mm.259659	Stk24	serine/threonine kinase 24 (STE20 homolog, yeast)	3	0.28815	0.079749	7.2264	0.00273223	0.0849104
P087	Mm.292510	Rac1	RAS-related C3 botulinum substrate 1	3	0.328375	0.09099	7.21784	0.00274154	0.0850393
H3010E04	Mm.38376	Rad1	RAD1 homolog (S. pombe)	3	0.9038	0.250477	7.21664	0.00274285	0.0849199
H3061H06	Mm.292470	AA545217	expressed sequence AA545217	3	0.800975	0.222079	7.21341	0.00274637	0.0848695
H3103A10	Mm.28560	Lyar	Ly1 antibody reactive clone	3	1.03425	0.286922	7.20928	0.00275089	0.0848499
H3024G02	Mm.287178	Prps1	phosphoribosyl pyrophosphate synthetase 1	3	1.28458	0.356766	7.20122	0.00275973	0.0849635
H3007C03	Mm.199964	D10Ertd438e	DNA segment, Chr 10, ERATO Doi 438, expressed	3	0.76055	0.211664	7.1864	0.00277608	0.0853073
H3078H02	Mm.266312	Zrf2	zuotin related factor 2	3	0.86175	0.239851	7.18572	0.00277683	0.0851717
P720	Mm.2444	Myc	myelocytomatosis oncogene	3	0.9034	0.251587	7.18162	0.00278138	0.0851527
H3032B01	Mm.220367	Nol5	nucleolar protein 5	3	0.8348	0.232575	7.17875	0.00278457	0.0850922
H3100H07	Mm.286907	Tcfap2e	transcription factor AP-2, epsilon	3	0.44875	0.125212	7.16784	0.00279674	0.0853058
H3090F07	Mm.28002	9530023G02	hypothetical protein 9530023G02	3	0.750625	0.209694	7.15925	0.00280638	0.0854415
H3040F06	Mm.999	Mpv17	Mpv17 transgene, kidney disease mutant	3	1.4334	0.400636	7.15562	0.00281046	0.0854079
H3073G08	Mm.214445	Smyd3	SET and MYND domain containing 3	3	0.40035	0.112111	7.142	0.00282584	0.0857173
H3003D08	Mm.247037	Bag2	Bcl2-associated athanogene 2	3	1.1689	0.327355	7.14149	0.00282643	0.0855775
H3104C04			EST	3	0.226425	0.063489	7.13275	0.00283637	0.0857208
H3008G12	Mm.41877	5730438N18Rik	RIKEN cDNA 5730438N18 gene	3	0.64685	0.181436	7.13034	0.00283911	0.0856465
H3096C01	Mm.286680	Wrnip1	Werner helicasae interacting protein 1	3	0.658325	0.185054	7.11496	0.00285674	0.0860207
H3050C07	Mm.172954		Mus musculus transcribed sequences	3	0.264025	0.074369	7.10045	0.0028735	0.0863674
H3049G05			EST	3	0.482275	0.135896	7.09771	0.00287667	0.0863052
H3094A08	Mm.27574	1100001A21Rik	RIKEN cDNA 1100001A21 gene	3	0.624725	0.176099	7.09517	0.00287963	0.0862369
P384	Mm.4619	Msh2	mutS homolog 2 (E. coli)	3	0.65995	0.186114	7.09189	0.00288344	0.0861944
H3074G02	Mm.196581	Mapk1	mitogen activated protein kinase 1	3	0.7084	0.199821	7.09035	0.00288523	0.0860918
H3031D08	Mm.218515	Mrpl9	mitochondrial ribosomal protein L9	3	0.690125	0.194701	7.08907	0.00288673	0.0859806
H3034B08	Mm.5510	2210023F24Rik	RIKEN cDNA 2210023F24 gene	3	0.396775	0.112044	7.08252	0.00289438	0.086053
H3001H11	Mm.173165	0610039G24Rik	RIKEN cDNA 0610039G24 gene	3	0.1983	0.056002	7.08186	0.00289515	0.0859206
P825	Mm.15755	Sin3a	transcriptional regulator, SIN3A (yeast)	3	0.606225	0.171284	7.07861	0.00289896	0.0858789
H3061C11	Mm.289456	D11Ertd497e	DNA segment, Chr 11, ERATO Doi 497, expressed	3	1.34302	0.379477	7.0783	0.00289932	0.0857356
H3022G03	Mm.2462	Psmc2	proteasome (prosome, macropain) 26S subunit, ATPase 2	3	0.4497	0.127171	7.07234	0.00290632	0.0857887
H3074G01	Mm.248337	Dnaja3	DnaJ (Hsp40) homolog, subfamily A, member 3	3	0.65155	0.184298	7.07062	0.00290836	0.0856951
H3091F08	Mm.181830	Ntan1	N-terminal Asn amidase	3	0.37245	0.105387	7.06821	0.0029112	0.0856256
H3004H06	Mm.27545	Hrmt1l2	heterogeneous nuclear ribonucleoproteins methyltransferase-like 2 (S. cerevisiae)	3	0.484025	0.137074	7.06226	0.00291822	0.0856791
H3121D03	Mm.322330		Mus musculus transcribed sequences	3	0.241075	0.068278	7.06153	0.00291908	0.0855519
H3131A03	Mm.296383	Hspca	heat shock protein 1, alpha	3	0.717175	0.203506	7.04818	0.00293494	0.0858639
H3082B04	Mm.19669	Pfkfb3	6-phosphofructo-2-kinase/fructose-2,6-biphosphatase 3	3	1.2038	0.341592	7.04817	0.00293495	0.085712
H3136F02	Mm.255063	Wrb	tryptophan rich basic protein	3	0.69055	0.196042	7.04493	0.00293882	0.0856731
H3076E05	Mm.133202	Brp16	brain protein 16	3	1.03175	0.293161	7.0388	0.00294615	0.085735
H3008F04	Mm.274690	Hnrpc	heterogeneous nuclear ribonucleoprotein C	3	0.8426	0.240354	7.01132	0.00297932	0.0865475
H3031E03	Mm.133560	Ddx10	DEAD (Asp-Glu-Ala-Asp) box polypeptide 10	3	0.683125	0.194955	7.00802	0.00298334	0.0865115
H3148G10	Mm.105230	6330548N22Rik	RIKEN cDNA 6330548N22 gene	3	0.334575	0.095589	7.00029	0.00299278	0.0866327
H3035B12	Mm.5547		Mus musculus cDNA clone MGC:60818 IMAGE:30047784, complete cds	3	0.560175	0.160144	6.99589	0.00299817	0.0866365
H3151D04	Mm.26838	9030611N15Rik	RIKEN cDNA 9030611N15 gene	3	0.34015	0.097283	6.99303	0.00300167	0.0865858
H3136A04	Mm.28196	Snx4	sorting nexin 4	3	0.25935	0.074341	6.97728	0.0030211	0.0869938
H3058C08	Mm.276572	Rras2	related RAS viral (r-ras) oncogene homolog 2	3	0.766325	0.219865	6.97086	0.00302905	0.0870707
H3139F02	Mm.218669	Tcea1	transcription elongation factor A (SII) 1	3	0.7707	0.22139	6.96236	0.00303965	0.087223
H3052B06	Mm.146649	Abcb1b	ATP-binding cassette, sub-family B (MDR/TAP), member 1B	3	1.17823	0.338529	6.96085	0.00304154	0.0871255
T123	Mm.2941	Mttp	microsomal triglyceride transfer protein	3	0.81775	0.235113	6.95624	0.0030473	0.087139
H3031E07	Mm.251638	0610023A07Rik	RIKEN cDNA 0610023A07 gene	3	0.653675	0.188328	6.94189	0.00306534	0.0875029
H3034B02	Mm.24912		Mus musculus transcribed sequences	3	0.404375	0.116524	6.94065	0.00306691	0.0873964
H3085G02	Mm.156956	Dgcr8	DiGeorge syndrome critical region gene 8	3	0.51135	0.147424	6.93713	0.00307136	0.087372
H3153C01	Mm.27117		Mus musculus 10 day old male pancreas cDNA, RIKEN full-length enriched library, clone:1810030A06 product:unknown EST, full insert sequence	3	0.7517	0.216882	6.93189	0.00307801	0.0874101
H3042B08	Mm.16753	Chek1	checkpoint kinase 1 homolog (S. pombe)	3	0.58015	0.16749	6.92758	0.00308348	0.0874148
H3013H05	Mm.59812	1200009B18Rik	RIKEN cDNA 1200009B18 gene	3	0.1964	0.05671	6.92644	0.00308493	0.0873058
H3031H12	Mm.30965	2810421I24Rik	RIKEN cDNA 2810421I24 gene	3	0.99205	0.286507	6.92514	0.00308658	0.0872026
H3073G07	Mm.22302	Gzmm	granzyme M (lymphocyte met-ase 1)	3	0.369325	0.10671	6.922	0.00309059	0.0871663
H3043H09	Mm.280230	1500005G05Rik	RIKEN cDNA 1500005G05 gene	3	1.1069	0.319832	6.92176	0.0030909	0.087026
H3038G12	Mm.140597	DXImx39e	DNA segment, Chr X, Immunex 39, expressed	3	0.564125	0.163065	6.91904	0.00309437	0.0869751
H3016D09	Mm.284906	Rars	arginyl-tRNA synthetase	3	0.553725	0.160063	6.91883	0.00309464	0.0868344
H3108G05	Mm.22700	Gtf2h1	general transcription factor II H, polypeptide 1	3	0.9204	0.266277	6.91311	0.00310196	0.0868918
H3083A03	Mm.27196	1700029F09Rik	RIKEN cDNA 1700029F09 gene	3	0.642275	0.185816	6.91303	0.00310207	0.0867473
H3024C06	Mm.326072		Mus musculus transcribed sequences	3	0.85115	0.246476	6.90656	0.00311038	0.0868322
H3041A11	Mm.296935		Mus musculus 0 day neonate thymus cDNA, RIKEN full-length enriched library, clone:A430010D03 product:unknown EST, full insert sequence	3	0.540225	0.1565	6.90385	0.00311386	0.0867824
H3114H02	Mm.29798	Cd34	CD34 antigen	3	1.0568	0.306425	6.89761	0.00312192	0.08686
H3081G04	Mm.7013	0610038L10Rik	RIKEN cDNA 0610038L10 gene	3	0.67555	0.195896	6.89701	0.0031227	0.0867351
H3099H12			EST	3	0.3742	0.108527	6.89598	0.00312403	0.0866261
H3022D10	Mm.29586		Mus musculus 10 days neonate medulla oblongata cDNA, RIKEN full-length enriched library, clone:B830039F09 product:BRAIN ACID SOLUBLE PROTEIN 1 (BASP1 PROTEIN) (NEURONAL AXONAL MEMBRANE PROTEIN NAP-22) homolog [Rattus norvegicus], full insert sequence	3	0.963775	0.279931	6.8858	0.00313724	0.0868462
H3113H11			EST	3	0.72805	0.211482	6.88522	0.003138	0.0867214
H3020A02	Mm.10211	Entpd5	ectonucleoside triphosphate diphosphohydrolase 5	3	0.647575	0.188165	6.88307	0.0031408	0.0866534
H3025D04	Mm.250874	Eif3s2	eukaryotic translation initiation factor 3, subunit 2 (beta)	3	0.16155	0.046963	6.87984	0.00314501	0.0866245
H3151C04	Mm.38917	Taf12	TAF12 RNA polymerase II, TATA box binding protein (TBP)-associated factor	3	0.53575	0.155894	6.87325	0.00315363	0.0867169
H3008A11	Mm.193688	Ptp4a2	protein tyrosine phosphatase 4a2	3	0.543625	0.158629	6.85405	0.00317893	0.087267
H3092F05	Mm.325851		Mus musculus transcribed sequence with weak similarity to protein ref:NP_032607.1 (M.musculus) melanoma antigen, 80 kDa [Mus musculus]	3	0.81965	0.239694	6.83914	0.00319875	0.0876649
H3114D08	Mm.275942	Arpc3	actin related protein 2/3 complex, subunit 3	3	0.473825	0.138891	6.82296	0.00322045	0.0881131
H3129F05	Mm.203928	Mrpl16	mitochondrial ribosomal protein L16	3	0.43695	0.128292	6.8118	0.00323554	0.088379
P378	Mm.5022	Mmp13	matrix metalloproteinase 13	3	1.28893	0.378721	6.80672	0.00324243	0.0884206
H3136C12	Mm.252316	Gss	glutathione synthetase	3	0.290875	0.0858	6.78033	0.00327857	0.0892584
H3100C11	Mm.173983		Mus musculus transcribed sequences	3	0.607025	0.179122	6.77776	0.00328211	0.0892073
H3085E04	Mm.35492	2600013N14Rik	RIKEN cDNA 2600013N14 gene	3	0.642225	0.1899	6.76384	0.00330142	0.0895843
H3125D03	Mm.236878	2310047I15Rik	RIKEN cDNA 2310047I15 gene	3	0.3824	0.113126	6.7606	0.00330593	0.0895593
H3154D05	Mm.29253	2310032N20Rik	RIKEN cDNA 2310032N20 gene	3	0.412475	0.122067	6.75818	0.00330931	0.0895034
H3060H11	Mm.304899		Mus musculus transcribed sequence with weak similarity to protein ref:NP_497213.1 (C.elegans) Y55B1AL.3.p [Caenorhabditis elegans]	3	0.3756	0.111192	6.75586	0.00331255	0.0894444
T165	Mm.196581	Mapk1	mitogen activated protein kinase 1	3	0.9132	0.270651	6.74817	0.00332332	0.0895881
H3085B02	Mm.172170		Mus musculus transcribed sequences	3	0.21535	0.063863	6.74415	0.00332898	0.0895941
H3023C02	Mm.2998	Nedd1	neural precursor cell expressed, developmentally down-regulated gene 1	3	0.6247	0.18566	6.7295	0.00334967	0.0900038
H3040D01			EST	3	0.388575	0.115574	6.72424	0.00335714	0.0900578
H3010F06	Mm.317374		Mus musculus transcribed sequences	3	0.8786	0.261451	6.72095	0.00336183	0.090037
H3043E06	Mm.34775	Pdha1	pyruvate dehydrogenase E1 alpha 1	3	0.695175	0.206993	6.71688	0.00336764	0.090046
H3004F07	Mm.193688	Ptp4a2	protein tyrosine phosphatase 4a2	3	0.4276	0.1274	6.71274	0.00337356	0.0900583
H3037F12	Mm.180056	Ctsc	cathepsin C	3	1.70425	0.508138	6.70782	0.00338061	0.0901005
H3042C03	Mm.3256	Ap3m1	adaptor-related protein complex 3, mu 1 subunit	3	0.552675	0.165098	6.6951	0.00339895	0.0904428
H3077E04	Mm.6952	Kpna1	karyopherin (importin) alpha 1	3	0.700425	0.20936	6.6911	0.00340474	0.0904509
H3103G04	Mm.12091	Rassf1	Ras association (RalGDS/AF-6) domain family 1	3	0.308725	0.092313	6.68868	0.00340825	0.0903981
H3126F09	Mm.172062		Mus musculus transcribed sequences	3	0.469875	0.140499	6.68864	0.00340831	0.0902546
H3015G10	Mm.12758	Fkbp4	FK506 binding protein 4	3	1.13785	0.340375	6.68586	0.00341235	0.0902164
H3043B04	Mm.22584	Strap	serine/threonine kinase receptor associated protein	3	1.22748	0.36742	6.68159	0.00341856	0.0902358
H3018H08	Mm.143728	Cts8	cathepsin 8	3	0.669025	0.200262	6.68149	0.00341871	0.0900953
H3016F11	Mm.1777	Hspd1	heat shock protein 1 (chaperonin)	3	0.93525	0.279977	6.68091	0.00341956	0.0899737
H3070F06	Mm.245867	2410017C19Rik	RIKEN cDNA 2410017C19 gene	3	0.843	0.252644	6.67342	0.0034305	0.0901176
T072	Mm.10124	Chkl	choline kinase-like	3	0.448275	0.134632	6.65927	0.00345129	0.0905195
H3081F05			EST	3	0.52725	0.158379	6.65807	0.00345307	0.0904222
H3100D04	Mm.4619	Msh2	mutS homolog 2 (E. coli)	3	0.89705	0.269635	6.6538	0.00345938	0.0904435
H3119C06	Mm.220367	Nol5	nucleolar protein 5	3	0.500825	0.15066	6.64841	0.00346737	0.0905089
H3054A03	Mm.272568	D5Ertd249e	DNA segment, Chr 5, ERATO Doi 249, expressed	3	0.705375	0.212276	6.64583	0.0034712	0.0904655
H3027F06	Mm.18230	1300007B12Rik	RIKEN cDNA 1300007B12 gene	3	0.416225	0.125275	6.645	0.00347244	0.0903548
H3046G05	Mm.27453	Grsf1	G-rich RNA sequence binding factor 1	3	0.56065	0.168924	6.63789	0.00348304	0.0904876
H3135H08	Mm.59393	Usp49	ubiquitin specific protease 49	3	0.4987	0.15028	6.63695	0.00348444	0.0903814
H3037E02	Mm.5624	Dhx16	DEAH (Asp-Glu-Ala-His) box polypeptide 16	3	0.425375	0.128219	6.63512	0.00348718	0.0903103
H3143G11	Mm.100167	B230331L10Rik	RIKEN cDNA B230331L10 gene	3	0.957075	0.288637	6.63168	0.00349233	0.0903017
H3129D12	Mm.247762	2610301D06Rik	RIKEN cDNA 2610301D06 gene	3	0.382075	0.115269	6.62927	0.00349594	0.0902533
H3002H04	Mm.258094	B3gnt1	UDP-GlcNAc:betaGal beta-1,3-N-acetylglucosaminyltransferase 1	3	0.422625	0.127521	6.62831	0.00349738	0.0901493
H3035B03	Mm.258404	2610009I02Rik	RIKEN cDNA 2610009I02 gene	3	0.96425	0.291032	6.62642	0.00350023	0.0900817
H3022A05	Mm.86744	Rab23	RAB23, member RAS oncogene family	3	0.8289	0.250714	6.61232	0.0035215	0.0904878
H3029H02	Mm.297197	Tm4sf10	transmembrane 4 superfamily member 10	3	0.5993	0.181789	6.59337	0.00355038	0.0910877
H3035F09	Mm.142263	Rce1	Ras and a-factor-converting enzyme 1 homolog (S. cerevisiae)	3	0.5195	0.157657	6.59024	0.00355518	0.0910689
H3158G08			EST	3	0.557725	0.169414	6.58416	0.00356452	0.0911663
H3015C06	Mm.2325	Pgm1	phosphoglucomutase 1	3	0.273775	0.083232	6.57857	0.00357315	0.0912454
H3017B12	Mm.249333	1300002F13Rik	RIKEN cDNA 1300002F13 gene	3	1.68385	0.512133	6.57583	0.00357738	0.0912122
H3027C01	Mm.28203	D11Ertd175e	DNA segment, Chr 11, ERATO Doi 175, expressed	3	0.76775	0.233524	6.57534	0.00357813	0.0910902
H3058H02	Mm.33970	Aasdhppt	aminoadipate-semialdehyde dehydrogenase-phosphopantetheinyl transferase	3	0.29325	0.089484	6.55424	0.00361098	0.0917846
H3017G10	Mm.283045	1500003D12Rik	RIKEN cDNA 1500003D12 gene	3	0.8415	0.256839	6.55273	0.00361334	0.0917032
H3153B12	Mm.28085	1700001A24Rik	RIKEN cDNA 1700001A24 gene	3	0.601325	0.183604	6.55024	0.00361725	0.091661
H3138A04	Mm.29878	1300006C06Rik	RIKEN cDNA 1300006C06 gene	3	0.890325	0.272056	6.54516	0.00362523	0.0917223
H3097B01	Mm.4606	Bcat1	branched chain aminotransferase 1, cytosolic	3	0.548575	0.167879	6.53536	0.00364071	0.0919725
H3028E01	Mm.29028	Dap3	death associated protein 3	3	0.245625	0.075183	6.53407	0.00364276	0.0918835
H3009F06	Mm.288383	Tcf1	transcription factor 1	3	0.802025	0.245644	6.52997	0.00364926	0.0919066
H3119A12	Mm.29105	Gtf3a	general transcription factor III A	3	0.394925	0.120983	6.5286	0.00365143	0.091821
H3007C04	Mm.84203	1810042K04Rik	RIKEN cDNA 1810042K04 gene	3	0.781325	0.239403	6.52729	0.00365352	0.0917335
H3015B09	Mm.183102	Actr3	ARP3 actin-related protein 3 homolog (yeast)	3	0.5615	0.172145	6.52357	0.00365945	0.0917423
H3101H04	Mm.44142	E030025C11Rik	RIKEN cDNA E030025C11 gene	3	0.766575	0.235042	6.52288	0.00366054	0.0916303
H3003H02			EST	3	1.05345	0.323018	6.52255	0.00366106	0.0915042
H3006H12	Mm.286830	Lap3	leucine aminopeptidase 3	3	1.0697	0.328141	6.51976	0.00366552	0.0914768
H3005E09	Mm.30250	Aldh7a1	aldehyde dehydrogenase family 7, member A1	3	0.622925	0.191167	6.51708	0.00366981	0.0914455
H3098E12	Mm.86541	Ccrn4l	CCR4 carbon catabolite repression 4-like (S. cerevisiae)	3	0.55635	0.170809	6.51428	0.00367428	0.0914185
H3101E01	Mm.207894	3010021M21Rik	RIKEN cDNA 3010021M21 gene	3	0.40885	0.12555	6.51294	0.00367643	0.0913342
H3144F01	Mm.296985	Cct4	chaperonin subunit 4 (delta)	3	0.54255	0.166637	6.51176	0.00367833	0.0912436
H3152B04	Mm.270376	2410118I19Rik	RIKEN cDNA 2410118I19 gene	3	0.9527	0.292803	6.50745	0.00368525	0.0912779
H3133G11	Mm.285076	Dlat	dihydrolipoamide S-acetyltransferase (E2 component of pyruvate dehydrogenase complex)	3	0.7427	0.228315	6.50592	0.00368772	0.0912018
H3121H03	Mm.4595	Fbl	fibrillarin	3	0.854175	0.262771	6.50128	0.00369519	0.0912496
H3134F08	Mm.18725	Crygc	crystallin, gamma C	3	0.4808	0.148108	6.49254	0.00370934	0.0914619
H3071A02	Mm.15252	Srpk1	serine/arginine-rich protein specific kinase 1	3	0.241875	0.074533	6.49039	0.00371283	0.091411
H3013H01	Mm.248337	Dnaja3	DnaJ (Hsp40) homolog, subfamily A, member 3	3	0.7541	0.232429	6.48886	0.00371532	0.0913358
H3070G09	Mm.8211	Pja1	praja1, RING-H2 motif containing	3	0.49345	0.152156	6.48613	0.00371976	0.0913088
H3011D04	Mm.25709	Ing1	inhibitor of growth family, member 1	3	0.3908	0.12051	6.48577	0.00372034	0.0911872
H3007H07			EST	3	0.301725	0.093215	6.47376	0.00373997	0.091532
T382	Mm.276572	Rras2	related RAS viral (r-ras) oncogene homolog 2	3	0.530775	0.16418	6.46578	0.00375309	0.0917168
H3132A02	Mm.252035	Maged2	melanoma antigen, family D, 2	3	0.572125	0.177212	6.45697	0.00376765	0.0919364
H3058A05	Mm.329011		Mus musculus 16 days neonate heart cDNA, RIKEN full-length enriched library, clone:D830017E01 product:protein kinase, cGMP-dependent, type I, full insert sequence	3	0.834825	0.258768	6.4523	0.0037754	0.091989
H3030F05	Mm.21864		Mus musculus adult male tongue cDNA, RIKEN full-length enriched library, clone:2310075E07 product:unknown EST, full insert sequence	3	0.6597	0.204664	6.44666	0.00378477	0.0920812
H3129B03	Mm.29746	Mrpl3	mitochondrial ribosomal protein L3	3	0.7645	0.237265	6.44428	0.00378875	0.092042
H3040C06	Mm.286591	Shmt1	serine hydroxymethyl transferase 1 (soluble)	3	1.1868	0.368911	6.43408	0.00380581	0.0923204
H3013B01	Mm.86343	Taf3	TAF3 RNA polymerase II, TATA box binding protein (TBP)-associated factor	3	0.59365	0.184546	6.43361	0.00380659	0.0922035
H3073A04	Mm.24516	Strn	striatin, calmodulin binding protein	3	0.6477	0.201376	6.43274	0.00380806	0.0921035
H3001B01	Mm.89268	9430023L20Rik	RIKEN cDNA 9430023L20 gene	3	0.894825	0.278472	6.42667	0.00381828	0.0922153
H3006B02	Mm.27853	D7Wsu180e	DNA segment, Chr 7, Wayne State University 180, expressed	3	0.4385	0.136565	6.42187	0.00382637	0.0922754
H3067H03	Mm.25321	BC024322	cDNA sequence BC024322	3	0.21665	0.067545	6.41495	0.0038381	0.0924229
H3013B12	Mm.252542	D10Ertd718e	DNA segment, Chr 10, ERATO Doi 718, expressed	3	0.470125	0.1466	6.41373	0.00384017	0.0923378
H3086H04	Mm.245566	Crsp2	cofactor required for Sp1 transcriptional activation subunit 2	3	0.18925	0.059019	6.41315	0.00384116	0.092227
H3017D09	Mm.29646	0610010E05Rik	RIKEN cDNA 0610010E05 gene	3	0.82685	0.257899	6.41219	0.00384278	0.0921316
H3127F07	Mm.156727	BC027756	cDNA sequence, BC027756	3	0.27725	0.086529	6.40828	0.00384943	0.092157
H3049G03			EST	3	0.69	0.21542	6.40609	0.00385317	0.0921125
H3002E03			EST	3	0.5818	0.181773	6.40138	0.00386122	0.0921712
H3026A03	Mm.278454	4833424P18Rik	RIKEN cDNA 4833424P18 gene	3	0.2967	0.092783	6.39558	0.00387114	0.0922744
H3024C01	Mm.258530	Uble1a	ubiquitin-like 1 (sentrin) activating enzyme E1A	3	0.6921	0.216574	6.39133	0.00387844	0.0923148
H3037H12	Mm.44882		Mus musculus transcribed sequences	3	2.42652	0.761164	6.37582	0.00390525	0.0928187
H3024B07	Mm.3862	Igf2	insulin-like growth factor 2	3	1.20378	0.378298	6.36417	0.00392555	0.0931669
H3104B07	Mm.280311	Mki67ip	Mki67 (FHA domain) interacting nucleolar phosphoprotein	3	0.352425	0.110815	6.36062	0.00393177	0.0931801
H3138B10	Mm.103080	Tex14	testis expressed gene 14	3	0.5961	0.187467	6.35951	0.00393371	0.0930921
H3075G03	Mm.21728	Psma7	proteasome (prosome, macropain) subunit, alpha type 7	3	0.473075	0.148889	6.35473	0.00394211	0.093157
H3014H01	Mm.284945	3830422N12Rik	RIKEN cDNA 3830422N12 gene	3	0.4445	0.139941	6.35269	0.00394569	0.093108
H3086C03	Mm.45644		Mus musculus 18-day embryo whole body cDNA, RIKEN full-length enriched library, clone:1110036H20 product:unknown EST, full insert sequence	3	1.03363	0.32589	6.34339	0.00396209	0.0933614
H3022C05	Mm.29890	Shmt2	serine hydroxymethyl transferase 2 (mitochondrial)	3	0.7771	0.245069	6.34188	0.00396477	0.093291
H3045B07	Mm.142263	Rce1	Ras and a-factor-converting enzyme 1 homolog (S. cerevisiae)	3	0.66965	0.211294	6.33857	0.00397063	0.0932957
H3041D08	Mm.29434	Zfp161	zinc finger protein 161	3	0.379725	0.119918	6.33309	0.00398038	0.0933914
H3066A10	Mm.28029	Ndfip2	Nedd4 family interacting protein 2	3	0.65595	0.207532	6.32144	0.00400118	0.093746
H3061A04	Mm.12411		Mus musculus 12 days embryo female mullerian duct includes surrounding region cDNA, RIKEN full-length enriched library, clone:6820416N07 product:unknown EST, full insert sequence	3	0.4584	0.145049	6.3206	0.00400268	0.093648
H3044G06	Mm.296908		Mus musculus similar to 3-phosphoglycerate dehydrogenase (LOC233938), mRNA	3	0.47095	0.149156	6.31487	0.00401299	0.093756
H3007H11			EST	3	0.2103	0.066677	6.30802	0.00402533	0.093911
H3084G01	Mm.25897		Mus musculus transcribed sequences	3	0.2904	0.092284	6.29361	0.00405148	0.0943874
P923	Mm.117076	Gprk2l	G protein-coupled receptor kinase 2, groucho gene related (Drosophila)	3	0.62745	0.199891	6.27794	0.00408017	0.0949215
H3005G08	Mm.261004	Uchl5	ubiquitin carboxyl-terminal esterase L5	3	0.224	0.071503	6.26548	0.00410317	0.095322
H3075E09	Mm.12479	D11Ertd714e	DNA segment, Chr 11, ERATO Doi 714, expressed	3	0.3582	0.114352	6.26484	0.00410434	0.095215
H3065E11	Mm.173577		Mus musculus transcribed sequences	3	0.29125	0.092987	6.26433	0.00410528	0.0951029
H3123B05	Mm.19806	Hdac2	histone deacetylase 2	3	0.57575	0.184186	6.25182	0.00412857	0.0955079
H3032H06			EST	3	0.2779	0.08891	6.25124	0.00412964	0.0953988
H3008B11	Mm.6215	Fosl1	fos-like antigen 1	3	1.73825	0.556147	6.25105	0.00413001	0.0952736
H3111F10	Mm.17436	Trim37	tripartite motif protein 37	3	0.440275	0.140868	6.2509	0.00413028	0.0951467
H3036G06	Mm.28427	BC021395	cDNA sequence BC021395	3	0.4774	0.152873	6.2457	0.00414002	0.0952378
H3069G11	Mm.129136	2610024G14Rik	RIKEN cDNA 2610024G14 gene	3	0.493175	0.158023	6.2418	0.00414734	0.0952732
H3082B02	Mm.31551	AA408296	expressed sequence AA408296	3	0.58085	0.186287	6.23609	0.00415809	0.095387
H3010B01			EST	3	0.1781	0.057176	6.22993	0.00416971	0.0955206
H3103D05	Mm.28301	Cth	cystathionase (cystathionine gamma-lyase)	3	0.67455	0.216553	6.22989	0.0041698	0.0953899
H3098B03	Mm.29098	A530057M15Rik	RIKEN cDNA A530057M15 gene	3	1.01263	0.325218	6.22736	0.00417458	0.0953668
H3027A03	Mm.290022	2310046H11Rik	RIKEN cDNA 2310046H11 gene	3	0.5225	0.167854	6.22564	0.00417785	0.0953094
H3015C04	Mm.180063	0610038F07Rik	RIKEN cDNA 0610038F07 gene	3	0.6916	0.222263	6.22325	0.00418238	0.0952807
H3012D10	Mm.126694	Whsc1	Wolf-Hirschhorn syndrome candidate 1 (human)	3	0.411825	0.132355	6.22302	0.00418283	0.0951594
H3130B08	Mm.3996	Chuk	conserved helix-loop-helix ubiquitous kinase	3	0.281875	0.090632	6.22024	0.00418811	0.0951482
H3012D09	Mm.29898	2410015N17Rik	RIKEN cDNA 2410015N17 gene	3	1.29563	0.417011	6.21387	0.00420025	0.0952924
H3066D04	Mm.291062		Mus musculus similar to DYSKERIN (LOC245474), mRNA	3	0.781425	0.251747	6.20803	0.00421143	0.0954148
H3007A12	Mm.31696	A230098A12Rik	RIKEN cDNA A230098A12 gene	3	0.370325	0.119363	6.20505	0.00421715	0.0954131
H3002D09	Mm.268176	Pelo	pelota homolog (Drosophila)	3	0.20735	0.066849	6.20356	0.00422001	0.0953467
H3017E11	Mm.89341	Hsp70-4	heat shock protein 4	3	1.00513	0.32478	6.18957	0.00424702	0.0958255
P760	Mm.4686	Ccl11	small chemokine (C-C motif) ligand 11	3	0.845275	0.273203	6.18788	0.00425029	0.0957682
H3084D05	Mm.273049	Ccnd1	cyclin D1	3	0.88645	0.286558	6.18688	0.00425224	0.0956812
H3099C06	Mm.121658	2810006K23Rik	RIKEN cDNA 2810006K23 gene	3	0.344375	0.11151	6.17657	0.00427231	0.0960017
H3126D07	Mm.275340	mSSH-1L	slingshot-like 1	3	0.288575	0.093594	6.16653	0.00429197	0.0963121
H3107H08	Mm.288737	1200015A19Rik	RIKEN cDNA 1200015A19 gene	3	0.487575	0.158365	6.1576	0.00430958	0.0965755
H3088F06	Mm.27591	2400006A19Rik	RIKEN cDNA 2400006A19 gene	3	0.17605	0.057197	6.15595	0.00431283	0.0965172
P370	Mm.31472	Mesp2	mesoderm posterior 2	3	0.62115	0.201856	6.1544	0.00431592	0.0964552
H3011F05	Mm.250874	Eif3s2	eukaryotic translation initiation factor 3, subunit 2 (beta)	3	0.4142	0.134619	6.15368	0.00431734	0.0963563
H3016H02	Mm.37562	Pold3	polymerase (DNA-directed), delta 3, accessory subunit	3	0.6532	0.212333	6.1526	0.00431948	0.0962737
H3027G10	Mm.276323	Zfp94	zinc finger protein 94	3	0.410275	0.133468	6.14791	0.00432879	0.0963506
H3054C07	Mm.9654	1110008J03Rik	RIKEN cDNA 1110008J03 gene	3	0.59405	0.193388	6.14359	0.00433737	0.0964114
H3094C02	Mm.13433	Dnmt3l	DNA (cytosine-5-)-methyltransferase 3-like	3	1.32015	0.430391	6.13466	0.00435523	0.0966778
H3097C01	Mm.286680	Wrnip1	Werner helicasae interacting protein 1	3	0.774425	0.252866	6.12519	0.00437426	0.0969696
H3090F05	Mm.173296		Mus musculus transcribed sequences	3	0.934075	0.305004	6.12501	0.00437461	0.0968471
H3021D02	Mm.273102	Mrpl28	mitochondrial ribosomal protein L28	3	0.435225	0.14222	6.12046	0.0043838	0.0969202
H3094F12	Mm.27832	Ralb	v-ral simian leukemia viral oncogene homolog B (ras related)	3	0.779075	0.254898	6.11283	0.00439925	0.0971315
H3013C11	Mm.32019	Tcp1	t-complex protein 1	3	0.687925	0.225111	6.11188	0.00440117	0.0970438
H3024E08	Mm.46716	Diablo	diablo homolog (Drosophila)	3	0.78675	0.257722	6.10542	0.00441432	0.0972036
H3041A06			EST	3	0.4869	0.159645	6.0998	0.0044258	0.0973263
H3099F02			EST	3	0.396475	0.130017	6.09882	0.00442782	0.0972407
H3020C11	Mm.168854	D5Wsu178e	DNA segment, Chr 5, Wayne State University 178, expressed	3	1.05482	0.345937	6.09837	0.00442873	0.0971314
H3049D09	Mm.3458	Rpo1-1	RNA polymerase 1-1	3	0.456475	0.149752	6.0964	0.00443278	0.0970909
H3023F11	Mm.296383	Hspca	heat shock protein 1, alpha	3	0.6236	0.204758	6.09109	0.00444368	0.0972004
H3016G11	Mm.26859	Gjb5	gap junction membrane channel protein beta 5	3	1.06565	0.350038	6.08876	0.00444847	0.097176
H3024G10	Mm.957	Cops4	COP9 (constitutive photomorphogenic) homolog, subunit 4 (Arabidopsis thaliana)	3	0.58075	0.190968	6.08217	0.00446208	0.0973443
H3058H07	Mm.27900	1810013D10Rik	RIKEN cDNA 1810013D10 gene	3	0.804775	0.264709	6.08044	0.00446565	0.0972932
H3084C11			EST	3	0.85795	0.28246	6.07484	0.00447727	0.0974177
H3105E09	Mm.166524	Ddx47	DEAD (Asp-Glu-Ala-Asp) box polypeptide 47	3	0.61585	0.202868	6.07142	0.00448438	0.0974435
H3033E11	Mm.28622	Txndc5	thioredoxin domain containing 5	3	0.540975	0.178614	6.05749	0.00451351	0.0979473
H3029C09	Mm.87312	Gmfb	glia maturation factor, beta	3	0.57165	0.189034	6.04812	0.00453324	0.098246
H3143B05	Mm.191937	Rnpc2	RNA-binding region (RNP1, RRM) containing 2	3	0.238475	0.079028	6.03523	0.00456056	0.0987083
H3018G11	Mm.244209	Usp15	ubiquitin specific protease 15	3	0.37375	0.124197	6.01865	0.00459603	0.0993455
H3027F02	Mm.28693	Dars	aspartyl-tRNA synthetase	3	0.678775	0.22589	6.00978	0.00461514	0.0996278
H3084G03	Mm.246513	Fos	FBJ osteosarcoma oncogene	3	0.65925	0.219465	6.0078	0.00461943	0.0995899
H3083G10			EST	3	0.204425	0.068053	6.0078	0.00461944	0.0994599
H3066H03	Mm.275953	4732496O08Rik	RIKEN cDNA 4732496O08 gene	3	0.619575	0.206418	6.00311	0.00462961	0.0995487
H3104D08	Mm.23670	2310010B21Rik	RIKEN cDNA 2310010B21 gene	3	0.645025	0.21562	5.98298	0.00467356	0.100363
H3056G10	Mm.291917	Txn2	thioredoxin 2	3	0.6388	0.213544	5.98284	0.00467387	0.100239
H3081E12	Mm.171639	2610312E17Rik	RIKEN cDNA 2610312E17 gene	3	0.47825	0.159906	5.98164	0.00467652	0.100165
H3104G04	Mm.182328		Mus musculus transcribed sequence with moderate similarity to protein sp:Q9Y3D8 (H.sapiens) CGD7_HUMAN Protein CGI-137 (Protein AD-004)	3	1.02625	0.343807	5.96992	0.00470239	0.100588
H3016A08	Mm.28853	1810010L20Rik	RIKEN cDNA 1810010L20 gene	3	0.36915	0.123685	5.96921	0.00470396	0.100491
T019	Mm.9925	Idh1	isocitrate dehydrogenase 1 (NADP+), soluble	3	0.6718	0.225317	5.96316	0.00471741	0.100648
H3022F05	Mm.314167		Mus musculus transcribed sequence with strong similarity to protein sp:Q61753 (M.musculus) SERA_MOUSE D-3-phosphoglycerate dehydrogenase (3-PGDH) (A10)	3	0.42795	0.144034	5.94235	0.00476399	0.101511
P341	Mm.239514	Traf1	Tnf receptor-associated factor 1	3	0.551575	0.185645	5.94226	0.0047642	0.101384
H3139A06	Mm.40132	Cldn12	claudin 12	3	0.8568	0.288437	5.94099	0.00476706	0.101314
H3004F02	Mm.821	Snrpa1	small nuclear ribonucleoprotein polypeptide A'	3	0.84505	0.28453	5.93997	0.00476937	0.101232
H3036A06	Mm.253090	Ap2a2	adaptor protein complex AP-2, alpha 2 subunit	3	0.69905	0.235678	5.93224	0.00478686	0.101473
H3024F05	Mm.24169	Cebpa-rs1	CCAAT/enhancer binding protein alpha (C/EBP), related sequence 1	3	0.687925	0.232063	5.92878	0.0047947	0.101508
H3077F03	Mm.27888	D1Ertd757e	DNA segment, Chr 1, ERATO Doi 757, expressed	3	0.439025	0.148146	5.92693	0.00479892	0.101467
H3047F07	Mm.25083		Mus musculus transcribed sequences	3	1.05323	0.355486	5.92555	0.00480206	0.101404
H3035A01	Mm.255332	Tnfaip2	tumor necrosis factor, alpha-induced protein 2	3	0.6291	0.212485	5.92135	0.00481163	0.101475
H3044B01	Mm.296985	Cct4	chaperonin subunit 4 (delta)	3	1.0116	0.341984	5.91606	0.00482372	0.1016
H3121C04	Mm.21848	Bzw1	basic leucine zipper and W2 domains 1	3	0.721275	0.244446	5.9013	0.00485769	0.102185
H3105D11	Mm.276721		Mus musculus similar to phospholysine phosphohistidine inorganic pyrophosphate phosphata (LOC384677), mRNA	3	0.752525	0.255156	5.89855	0.00486406	0.102189
H3100G04			EST	3	0.87045	0.295223	5.8969	0.00486789	0.102139
H3056H10	Mm.132868	Rbbp5	retinoblastoma binding protein 5	3	0.61185	0.207562	5.89559	0.00487093	0.102073
H3125D09	Mm.180337	3110002K08Rik	RIKEN cDNA 3110002K08 gene	3	0.624225	0.212045	5.88768	0.00488933	0.102328
H3091H12	Mm.97383	1110007A13Rik	RIKEN cDNA 1110007A13 gene	3	0.75385	0.256154	5.88592	0.00489342	0.102284
H3048E09	Mm.1654	6230425C22Rik	RIKEN cDNA 6230425C22 gene	3	0.655875	0.223413	5.87142	0.00492743	0.102864
H3021A06	Mm.61682	2610528A17Rik	RIKEN cDNA 2610528A17 gene	3	1.0279	0.351238	5.85301	0.00497106	0.103644
H3022A07	Mm.34612	Eif2b3	eukaryotic translation initiation factor 2B, subunit 3	3	1.05042	0.35909	5.85049	0.00497707	0.103637
H3030F04	Mm.218669	Tcea1	transcription elongation factor A (SII) 1	3	0.82545	0.282221	5.84968	0.004979	0.103547
H3008F06	Mm.196424	Prlpe	prolactin-like protein E	3	0.410525	0.140431	5.84664	0.00498626	0.103567
H3011H11	Mm.280083	2010004J23Rik	RIKEN cDNA 2010004J23 gene	3	0.495775	0.170044	5.83112	0.00502357	0.104211
H3028F10	Mm.275762	Ncoa4	nuclear receptor coactivator 4	3	0.095975	0.032943	5.82682	0.00503399	0.104295
H3072G05	Mm.3823	Elavl2	ELAV (embryonic lethal, abnormal vision, Drosophila)-like 2 (Hu antigen B)	3	0.173475	0.059752	5.80647	0.00508361	0.105191
H3114F12			EST	3	0.3723	0.1283	5.80358	0.00509069	0.105205
H3091F01	Mm.26033		Mus musculus transcribed sequences	3	0.320625	0.11056	5.8	0.00509951	0.105256
H3022D07	Mm.15974	1810030O07Rik	RIKEN cDNA 1810030O07 gene	3	0.71365	0.246209	5.7971	0.00510666	0.105271
H3078C06	Mm.26150		Mus musculus adult male epididymis cDNA, RIKEN full-length enriched library, clone:9230115E21 product:kinesin family member C5A, full insert sequence	3	0.3459	0.119351	5.79634	0.00510855	0.105179
H3071H02	Mm.173738		Mus musculus transcribed sequences	3	0.172925	0.059677	5.7954	0.00511085	0.105095
H3114A12	Mm.291062		Mus musculus similar to DYSKERIN (LOC245474), mRNA	3	0.8211	0.28349	5.79279	0.00511733	0.105097
T010	Mm.289348	Pdhb	pyruvate dehydrogenase (lipoamide) beta	3	0.555875	0.191921	5.79276	0.0051174	0.104967
H3062H12	Mm.130260	5730419I09Rik	RIKEN cDNA 5730419I09 gene	3	0.4591	0.158691	5.7861	0.00513392	0.105175
H3002A04			EST	3	0.3684	0.127492	5.77917	0.00515118	0.105398
T074	Mm.22633	Dgat1	diacylglycerol O-acyltransferase 1	3	0.4085	0.141425	5.77691	0.00515683	0.105382
H3156H10	Mm.29054	2610529I12Rik	RIKEN cDNA 2610529I12 gene	3	1.29068	0.446858	5.77666	0.00515745	0.105264
H3097D10	Mm.173249		Mus musculus transcribed sequences	3	0.410925	0.14231	5.77506	0.00516144	0.105216
H3046F11	Mm.280083	2010004J23Rik	RIKEN cDNA 2010004J23 gene	3	0.642525	0.222632	5.77208	0.00516892	0.105238
H3041G01			EST	3	0.641225	0.222194	5.77175	0.00516976	0.105125
H3007E02	Mm.426	Gstp2	glutathione S-transferase, pi 2	3	0.8297	0.287561	5.7706	0.00517264	0.105054
H3088F08	Mm.272354	Itgb4bp	integrin beta 4 binding protein	3	0.184025	0.063785	5.77016	0.00517374	0.104947
H3107B04	Mm.3411	Orc2l	origin recognition complex, subunit 2-like (S. cerevisiae)	3	1.06462	0.369129	5.7683	0.0051784	0.104912
H3016C10	Mm.296383	Hspca	heat shock protein 1, alpha	3	0.48795	0.16938	5.76161	0.00519528	0.105125
H3054C06	Mm.296842	Ppp1r14b	protein phosphatase 1, regulatory (inhibitor) subunit 14B	3	0.852475	0.296325	5.75364	0.00521543	0.105403
H3045H01	Mm.146873	0610039N19Rik	RIKEN cDNA 0610039N19 gene	3	0.516925	0.180021	5.74293	0.00524272	0.105825
H3047A04	Mm.253042	3830421F13Rik	RIKEN cDNA 3830421F13 gene	3	0.2251	0.078425	5.74051	0.00524889	0.105819
H3073E09	Mm.24789	Gdpd1	glycerophosphodiester phosphodiesterase domain containing 1	3	0.78485	0.273669	5.73577	0.00526105	0.105935
H3146G09	Mm.117112	Usp27x	ubiquitin specific protease 27, X chromosome	3	0.552775	0.19291	5.7309	0.00527357	0.106057
H3068G11	Mm.18203	Eed	embryonic ectoderm development	3	0.748	0.261061	5.73045	0.00527472	0.105951
H3055D08	Mm.24538	C80879	expressed sequence C80879	3	0.954075	0.333147	5.72765	0.00528196	0.105967
H3023F12	Mm.296383	Hspca	heat shock protein 1, alpha	3	0.5873	0.205497	5.71589	0.00531241	0.106449
H3001C11	Mm.294870	Il25	interleukin 25	3	0.369625	0.12936	5.71467	0.00531558	0.106383
H3054D12			EST	3	0.5886	0.20643	5.70266	0.00534695	0.106881
H3004C02			EST	3	0.81315	0.286005	5.68626	0.00539017	0.107614
H3068B02	Mm.312175		Mus musculus transcribed sequences	3	1.08452	0.381589	5.68426	0.00539548	0.10759
H3040C10			EST	3	0.46245	0.162739	5.68332	0.00539796	0.107509
H3129H08	Mm.4848	Fyn	Fyn proto-oncogene	3	0.429675	0.151269	5.68093	0.00540433	0.107506
H3058C05	Mm.272298	Cyp11a1	cytochrome P450, family 11, subfamily a, polypeptide 1	3	0.349025	0.122917	5.67903	0.00540938	0.107476
H3111G06	Mm.265929	Vti1b	vesicle transport through interaction with t-SNAREs 1B homolog	3	0.245	0.086296	5.67811	0.00541183	0.107395
H3001D12	Mm.214127	LOC382252	similar to Bcl-2-associated transcription factor	3	0.5485	0.193254	5.67647	0.0054162	0.107353
H3032A01	Mm.247093	Timm23	translocase of inner mitochondrial membrane 23 homolog (yeast)	3	0.432725	0.152472	5.67611	0.00541715	0.107243
H3152B06	Mm.274579	4930429H24Rik	RIKEN cDNA 4930429H24 gene	3	0.442525	0.156019	5.6727	0.00542627	0.107294
H3015B07	Mm.46029	2610029K21Rik	RIKEN cDNA 2610029K21 gene	3	0.821925	0.289787	5.67262	0.00542648	0.10717
H3008H08	Mm.218533	1500016H10Rik	RIKEN cDNA 1500016H10 gene	3	0.38275	0.135264	5.65929	0.00546226	0.107747
P335	Mm.31630	Tcf7	transcription factor 7, T-cell specific	3	0.7827	0.27661	5.65923	0.00546243	0.107622
H3025B02	Mm.21728	Psma7	proteasome (prosome, macropain) subunit, alpha type 7	3	0.3853	0.136322	5.6528	0.00547979	0.107835
H3021H11	Mm.290813	Fem1a	feminization 1 homolog a (C. elegans)	3	0.3061	0.108678	5.63318	0.00553326	0.108757
H3042H08	Mm.114382	Spred2	sprouty protein with EVH-1 domain 2, related sequence	3	0.449075	0.159456	5.6326	0.00553485	0.108659
H3141G05			EST	3	0.861125	0.305829	5.63142	0.00553808	0.108593
H3091G09	Mm.295454		Mus musculus transcribed sequence with moderate similarity to protein sp:P00722 (E. coli) BGAL_ECOLI Beta-galactosidase (Lactase)	3	0.715625	0.254514	5.62346	0.00555999	0.108893
H3090B05	Mm.112312		Mus musculus transcribed sequences	3	0.2621	0.09326	5.62085	0.00556719	0.108904
H3017D08	Mm.27695	2700079K05Rik	RIKEN cDNA 2700079K05 gene	3	0.69485	0.247399	5.61723	0.0055772	0.10897
H3066E11	Mm.83689	4833406I20Rik	RIKEN cDNA 4833406I20 gene	3	0.26875	0.095709	5.61598	0.00558068	0.108909
H3032C09	Mm.243234	Psmd2	proteasome (prosome, macropain) 26S subunit, non-ATPase, 2	3	0.5124	0.182629	5.61139	0.00559343	0.109029
H3014A06	Mm.45272	Hspbap1	Hspb associated protein 1	3	0.6578	0.234473	5.61089	0.00559482	0.108927
P624	Mm.180056	Ctsc	cathepsin C	3	1.87105	0.667209	5.60859	0.00560123	0.108923
H3144D10	Mm.4352	Col18a1	procollagen, type XVIII, alpha 1	3	1.52563	0.544041	5.60849	0.00560149	0.1088
H3058A03			EST	3	0.4254	0.15209	5.59407	0.00564186	0.109455
H3128F12	Mm.258140	Dnajc7	DnaJ (Hsp40) homolog, subfamily C, member 7	3	0.255375	0.091337	5.59191	0.00564794	0.109444
H3051A05	Mm.28991		Mus musculus adult male urinary bladder cDNA, RIKEN full-length enriched library, clone:9530057C04 product:CDNA FLJ14585 FIS, CLONE NT2RM4001611, WEAKLY SIMILAR TO SIS2 PROTEIN homolog [Homo sapiens], full insert sequence	3	0.226675	0.081116	5.5889	0.00565644	0.10948
H3009G02			EST	3	0.649725	0.232653	5.58535	0.00566646	0.109545
H3114A01	Mm.41562	2610002K22Rik	RIKEN cDNA 2610002K22 gene	3	0.611675	0.219049	5.58482	0.00566797	0.109446
H3032D10			EST	3	1.014	0.363137	5.58467	0.0056684	0.109326
H3017H12	Mm.271711	Tagln2	transgelin 2	3	1.25578	0.450454	5.5756	0.00569413	0.109694
H3049E07	Mm.279195	Idh3a	isocitrate dehydrogenase 3 (NAD+) alpha	3	0.6823	0.244939	5.57119	0.00570671	0.109807
H3094F09	Mm.44069	Rnf12	ring finger protein 12	3	0.518375	0.18627	5.56583	0.00572203	0.109974
H3126D06	Mm.17917	D4Wsu27e	DNA segment, Chr 4, Wayne State University 27, expressed	3	0.5553	0.199627	5.56339	0.00572905	0.10998
H3081G12	Mm.29960	AI326906	expressed sequence AI326906	3	1.25228	0.450238	5.56273	0.00573094	0.109889
H3098H07	Mm.27686	AI315068	expressed sequence AI315068	3	0.2977	0.107111	5.55872	0.00574246	0.109981
H3130H12	Mm.290771	Rpl3	ribosomal protein L3	3	0.283275	0.101942	5.55759	0.00574571	0.109916
H3153D10	Mm.213261	D15Wsu75e	DNA segment, Chr 15, Wayne State University 75, expressed	3	0.6765	0.243721	5.55143	0.00576348	0.110128
H3111C07	Mm.277779	Adprt1	ADP-ribosyltransferase (NAD+; poly (ADP-ribose) polymerase) 1	3	0.523425	0.188879	5.54245	0.00578955	0.110498
H3014F01			EST	3	0.473775	0.170988	5.54162	0.00579196	0.110416
H3016G02	Mm.301286	AB041549	hypothetical protein, MNCb-4414	3	0.29575	0.106762	5.54035	0.00579565	0.110359
H3131C08	Mm.273769	D030074E01Rik	RIKEN cDNA D030074E01 gene	3	0.3333	0.120429	5.53519	0.0058107	0.110517
H3136B02	Mm.22117	Polr2g	polymerase (RNA) II (DNA directed) polypeptide G	3	0.210025	0.07589	5.53499	0.00581129	0.110401
H3130F08	Mm.291245		Mus musculus similar to hemicentin; fibulin 6 (LOC240793), mRNA	3	1.28232	0.46346	5.53371	0.00581506	0.110345
H3045B03	Mm.275188	Cyp2s1	cytochrome P450, family 2, subfamily s, polypeptide 1	3	0.302	0.109198	5.53126	0.00582223	0.110354
H3013H07	Mm.7884	1810010A06Rik	RIKEN cDNA 1810010A06 gene	3	0.977225	0.35335	5.53121	0.00582237	0.11023
H3078D07	Mm.12246	Ier5	immediate early response 5	3	0.724425	0.262032	5.52928	0.00582803	0.110211
H3082E03	Mm.240434	Pdcd8	programmed cell death 8	3	0.21215	0.076754	5.52807	0.00583157	0.110151
H3127E05	Mm.182672		Mus musculus transcribed sequences	3	0.3545	0.128503	5.51739	0.00586307	0.110619
H3020E03	Mm.28221	AW544865	expressed sequence AW544865	3	0.489625	0.17756	5.51502	0.00587007	0.110625
H3031G01	Mm.292868	Crsp6	cofactor required for Sp1 transcriptional activation, subunit 6	3	0.272425	0.098854	5.51169	0.00587996	0.110684
H3113C07	Mm.291824	BC032271	cDNA sequence BC032271	3	0.90555	0.329312	5.49965	0.00591586	0.111233
T175	Mm.289737	Raf1	v-raf-1 leukemia viral oncogene 1	3	0.292225	0.106374	5.49428	0.00593193	0.111408
H3079G03	Mm.27871	2610012O22Rik	RIKEN cDNA 2610012O22 gene	3	0.79175	0.288283	5.49287	0.00593618	0.111361
H3088C02	Mm.101591	Daf1	decay accelerating factor 1	3	1.07937	0.393439	5.48688	0.00595423	0.111572
H3019F04	Mm.126694	Whsc1	Wolf-Hirschhorn syndrome candidate 1 (human)	3	0.710375	0.259107	5.48326	0.00596517	0.11165
H3025B08	Mm.29203	Nol1	nucleolar protein 1	3	0.633825	0.231312	5.48026	0.00597424	0.111693
H3018B07	Mm.135689	Trim27	tripartite motif protein 27	3	0.8205	0.299459	5.47988	0.00597539	0.111588
H3080E12	Mm.4381	Satb1	special AT-rich sequence binding protein 1	3	1.04515	0.381664	5.47681	0.00598471	0.111636
H3013A12	Mm.165079	Crry	complement receptor related protein	3	0.65075	0.237641	5.47676	0.00598488	0.111512
H3100D11			EST	3	0.859625	0.314284	5.47038	0.0060043	0.111748
P908	Mm.218891	Catnal1	catenin alpha-like 1	3	0.72715	0.265894	5.46946	0.00600709	0.111674
H3123F12	Mm.157190	Hmga2	high mobility group AT-hook 2	3	0.96645	0.353789	5.46343	0.00602555	0.11189
H3054G05	Mm.15755	Sin3a	transcriptional regulator, SIN3A (yeast)	3	0.45895	0.168106	5.46023	0.00603537	0.111947
H3021A11	Mm.142132	Timm9	translocase of inner mitochondrial membrane 9 homolog (yeast)	3	0.53775	0.197084	5.45707	0.00604509	0.112001
H3122B11	Mm.29780	1110054L24Rik	RIKEN cDNA 1110054L24 gene	3	0.209275	0.076726	5.45511	0.00605112	0.111987
H3082A01	Mm.132208	Ipo11	importin 11	3	0.7031	0.257813	5.45434	0.00605349	0.111905
H3006C12	Mm.255858	Sh2bp1	SH2 domain binding protein 1 (tetratricopeptide repeat containing)	3	0.6173	0.226579	5.44888	0.00607037	0.112091
H3091H08			EST	3	0.56675	0.208232	5.44346	0.00608719	0.112276
H3081B02	Mm.284503	Cds2	CDP-diacylglycerol synthase (phosphatidate cytidylyltransferase) 2	3	0.3976	0.14654	5.42649	0.0061402	0.113127
T191	Mm.2605	Rbp4	retinol binding protein 4, plasma	3	1.00673	0.371104	5.42556	0.00614312	0.113054
H3158F01	Mm.28494	Mrpl11	mitochondrial ribosomal protein L11	3	0.20395	0.075186	5.42524	0.00614412	0.112946
H3131C03	Mm.280125	Crk	v-crk sarcoma virus CT10 oncogene homolog (avian)	3	0.68915	0.254092	5.42442	0.00614672	0.112868
H3021F02	Mm.236868	Rps3	ribosomal protein S3	3	0.899	0.331904	5.41724	0.00616937	0.113158
H3095H11			EST	3	0.511675	0.189018	5.41404	0.0061795	0.113217
H3051C05	Mm.196630		Mus musculus mRNA similar to hypothetical protein MGC5576 (cDNA clone MGC:54819 IMAGE:6308771), complete cds	3	0.64185	0.237242	5.41093	0.00618936	0.113272
H3121E10	Mm.294623	1500010B24Rik	RIKEN cDNA 1500010B24 gene	3	0.571	0.211103	5.40967	0.00619335	0.113219
H3017A04			EST	3	0.483075	0.178622	5.4089	0.0061958	0.113139
H3060E07	Mm.274160	Sah	SA rat hypertension-associated homolog	3	0.336925	0.124771	5.40071	0.00622189	0.113489
H3032E09	Mm.261691	1810020G14Rik	RIKEN cDNA 1810020G14 gene	3	0.79945	0.296184	5.39834	0.00622949	0.113502
H3146H07	Mm.284306	Tubgcp5	tubulin, gamma complex associated protein 5	3	0.537575	0.199482	5.3897	0.00625723	0.113882
H3118C07	Mm.1777	Hspd1	heat shock protein 1 (chaperonin)	3	0.776725	0.288359	5.38722	0.00626524	0.113902
H3053A01	Mm.28835	Tnfsf13b	tumor necrosis factor (ligand) superfamily, member 13b	3	0.59605	0.221401	5.38436	0.00627448	0.113944
H3080E07	Mm.5473		Mus musculus similar to MGC45438 protein (LOC239691), mRNA	3	0.5315	0.198382	5.35835	0.00635929	0.115357
H3039H09			EST	3	0.50865	0.19039	5.34326	0.00640919	0.116134
H3059G11	Mm.210745	Glul	glutamate-ammonia ligase (glutamine synthase)	3	0.66965	0.250697	5.3423	0.00641237	0.116064
H3014B06	Mm.290142	D5Ertd33e	DNA segment, Chr 5, ERATO Doi 33, expressed	3	0.748375	0.280392	5.33806	0.00642648	0.116192
H3036B04	Mm.172632		Mus musculus transcribed sequences	3	0.85105	0.319166	5.33296	0.00644351	0.116372
H3026B02	Mm.218891	Catnal1	catenin alpha-like 1	3	0.5777	0.216705	5.33168	0.00644779	0.116322
P847	Mm.7286	Ctbp1	C-terminal binding protein 1	3	0.261125	0.097995	5.32935	0.00645562	0.116335
H3108E11	Mm.189573	4921538N17Rik	RIKEN cDNA 4921538N17 gene	3	0.115475	0.043346	5.32801	0.00646011	0.116289
H3025H01	Mm.2948	H2-Ke2	H2-K region expressed gene 2	3	0.494525	0.185681	5.3266	0.00646486	0.116248
H3012A10	Mm.27218	Morf4l2	mortality factor 4 like 2	3	0.49645	0.186511	5.32355	0.00647509	0.116305
H3013E03	Mm.294120	Rnf41	ring finger protein 41	3	0.341825	0.128498	5.32031	0.00648602	0.116374
H3051A10	Mm.31278	2700049P18Rik	RIKEN cDNA 2700049P18 gene	3	0.2677	0.100633	5.3203	0.00648608	0.116248
H3087E07	Mm.255773		Mus musculus transcribed sequence with weak similarity to protein ref:NP_004501.2 (H.sapiens) SP110 nuclear body protein, isoform b; interferon-induced protein 75, 52kD; interferon-induced protein 41, 30kD; transcriptional coactivator Sp110; phosphoprotein 41; phosphoprotein 75 [Homo sapiens]	3	0.318325	0.119667	5.32018	0.00648648	0.116129
T144	Mm.2271	Ccl9	chemokine (C-C motif) ligand 9	3	1.31927	0.496172	5.31781	0.00649447	0.116146
H3002D04	Mm.182962	Eif3s5	eukaryotic translation initiation factor 3, subunit 5 (epsilon)	3	0.528	0.198585	5.31762	0.00649512	0.116032
H3134B11	Mm.41274	5730439E10Rik	RIKEN cDNA 5730439E10 gene	3	0.5485	0.206461	5.31335	0.00650959	0.116164
H3071C11	Mm.173715		Mus musculus transcribed sequences	3	0.264325	0.099646	5.30526	0.00653708	0.116528
H3073F10	Mm.19306	Capn2	calpain 2	3	0.768175	0.289636	5.30442	0.00653994	0.116453
H3005E07	Mm.303708		Mus musculus transcribed sequences	3	0.778525	0.293708	5.30135	0.00655045	0.116514
H3084H08	Mm.28811	D330037H05Rik	RIKEN cDNA D330037H05 gene	3	0.554	0.209025	5.3008	0.00655231	0.116422
H3124H07	Mm.270109	Nr2f2	nuclear receptor subfamily 2, group F, member 2	3	0.128	0.048311	5.29895	0.00655867	0.116409
H3101H05	Mm.313777		Mus musculus transcribed sequence with moderate similarity to protein ref:NP_038602.1 (M.musculus) L1 repeat, Tf subfamily, member 18 [Mus musculus]	3	0.154925	0.058497	5.29687	0.00656578	0.11641
H3131C02	Mm.329657		Mus musculus transcribed sequence with moderate similarity to protein pir:S55024 (H.sapiens) S55024 nebulin, skeletal muscle - human	3	0.419225	0.158882	5.27717	0.00663379	0.117489
P842	Mm.289106	Add1	adducin 1 (alpha)	3	0.63825	0.242017	5.27442	0.00664338	0.117533
H3004D04	Mm.31551	AA408296	expressed sequence AA408296	3	0.53425	0.202596	5.27404	0.00664471	0.11743
H3010C05	Mm.46438	1110007A10Rik	RIKEN cDNA 1110007A10 gene	3	0.4643	0.17608	5.27373	0.00664576	0.117323
H3024D09	Mm.2654	Wdr1	WD repeat domain 1	3	0.188575	0.071557	5.27062	0.00665662	0.117389
T460	Mm.290320	Ccl2	chemokine (C-C motif) ligand 2	3	1.78198	0.676381	5.26914	0.00666178	0.117354
H3020H09			EST	3	0.47255	0.179606	5.26206	0.00668658	0.117665
H3011A09			EST	3	0.48465	0.1843	5.25935	0.00669614	0.117708
P897	Mm.250419	Ccni	cyclin I	3	0.413825	0.157384	5.2588	0.00669807	0.117616
H3037B03	Mm.312411		Mus musculus transcribed sequence with weak similarity to protein ref:NP_443092.1 (H.sapiens) kruppel-like zinc finger protein [Homo sapiens]	3	1.4469	0.550608	5.25564	0.0067092	0.117686
H3126A11			EST	3	0.53325	0.203022	5.25313	0.00671806	0.117716
H3082A08	Mm.276459		Mus musculus transcribed sequences	3	0.8394	0.319662	5.2518	0.00672276	0.117673
H3012A01	Mm.99113	Smarcad1	SWI/SNF-related, matrix-associated actin-dependent regulator of chromatin, subfamily a, containing DEAD/H box 1`	3	0.59265	0.225856	5.24803	0.0067361	0.117782
P387	Mm.9404	Nbl1	neuroblastoma, suppression of tumorigenicity 1	3	0.95895	0.365789	5.24319	0.0067533	0.117957
H3139A08	Mm.252718	Rgnef	Rho-guanine nucleotide exchange factor	3	0.474075	0.180867	5.24226	0.00675663	0.11789
H3001F03			EST	3	0.367475	0.140338	5.237	0.00677538	0.118092
H3005C11	Mm.249328	Wdr5	WD repeat domain 5	3	0.50825	0.194163	5.2353	0.00678144	0.118073
H3046F12	Mm.11688	2010310D06Rik	RIKEN cDNA 2010310D06 gene	3	0.872225	0.333363	5.23288	0.00679012	0.118099
H3028F02	Mm.27330	Smarce1	SWI/SNF related, matrix associated, actin dependent regulator of chromatin, subfamily e, member 1	3	0.273	0.104382	5.23079	0.00679762	0.118105
H3058E01	Mm.22833	Prpf4	PRP4 pre-mRNA processing factor 4 homolog (yeast)	3	0.3862	0.147738	5.22817	0.00680703	0.118144
H3100B10			EST	3	0.31745	0.121857	5.21019	0.00687207	0.119147
H3114H03	Mm.247762	2610301D06Rik	RIKEN cDNA 2610301D06 gene	3	0.43115	0.165542	5.20895	0.00687658	0.1191
H3125B11			EST	3	0.347325	0.1334	5.20726	0.00688275	0.119082
H3013A07	Mm.137966	2410195B05Rik	RIKEN cDNA 2410195B05 gene	3	0.6194	0.237903	5.20716	0.0068831	0.118963
H3049F05	Mm.4113	Rae1	RAE1 RNA export 1 homolog (S. pombe)	3	0.627725	0.241151	5.20606	0.00688711	0.118907
H3158B02	Mm.45748	2810013M15Rik	RIKEN cDNA 2810013M15 gene	3	0.82835	0.318239	5.20583	0.00688796	0.118797
H3021G04	Mm.193035	Rad9	RAD9 homolog (S. pombe)	3	0.307	0.11801	5.20295	0.00689849	0.118855
H3026F07	Mm.289900	Cct7	chaperonin subunit 7 (eta)	3	0.377125	0.145121	5.19738	0.00691892	0.119082
H3008A03	Mm.4481	Il17r	interleukin 17 receptor	3	0.305175	0.117534	5.19297	0.00693511	0.119236
H3021H01	Mm.41622	2810014D17Rik	RIKEN cDNA 2810014D17 gene	3	0.805375	0.310277	5.19133	0.00694115	0.119216
H3091B12	Mm.167813		Mus musculus transcribed sequences	3	0.407775	0.157225	5.18716	0.00695658	0.119356
H3032D04	Mm.272015	Mcrs1	microspherule protein 1	3	0.517175	0.19952	5.18419	0.00696759	0.119421
H3076E08	Mm.257482	Aatf	apoptosis antagonizing transcription factor	3	0.825275	0.318442	5.18321	0.00697119	0.119358
H3026H03	Mm.4502	Mcm3	minichromosome maintenance deficient 3 (S. cerevisiae)	3	0.714375	0.275808	5.18023	0.00698227	0.119424
H3105G10	Mm.274180	P5cr2	pyrroline-5-carboxylate reductase	3	0.408075	0.157782	5.17263	0.00701057	0.119783
H3129A03	Mm.27957	BC037674	cDNA sequence BC037674	3	0.654625	0.253644	5.16176	0.00705133	0.120355
H3159G03	Mm.124316	Tfpi	tissue factor pathway inhibitor	3	0.389025	0.150774	5.16037	0.00705659	0.12032
H3073G02			EST	3	0.571425	0.2215	5.15958	0.00705955	0.120246
H3044E12	Mm.258140	Dnajc7	DnaJ (Hsp40) homolog, subfamily C, member 7	3	0.4646	0.180095	5.1595	0.00705985	0.120127
H3080A09	Mm.218910	Cul5	cullin 5	3	0.180525	0.069993	5.15837	0.00706413	0.120076
H3019E02	Mm.88546	Crlz1	charged amino acid rich leucine zipper 1	3	0.24125	0.093551	5.15761	0.00706699	0.12
H3023A10	Mm.3830	Fpgs	folylpolyglutamyl synthetase	3	0.7918	0.307075	5.15704	0.00706915	0.119913
H3029C06	Mm.285724	Hspa8	heat shock protein 8	3	0.745725	0.289377	5.15401	0.00708059	0.119984
H3118B09	Mm.273209	AW548124	expressed sequence AW548124	3	0.5175	0.200848	5.15316	0.00708381	0.119915
H3103A12	Mm.17853		Mus musculus similar to potassium channel regulator 1 (LOC380959), mRNA	3	0.83575	0.324834	5.14571	0.00711211	0.120271
H3052B02			EST	3	0.570475	0.221782	5.14445	0.00711689	0.120228
T359	Mm.29196	Cyc1	cytochrome c-1	3	0.6776	0.263538	5.14232	0.00712501	0.120242
H3114A06	Mm.2734	Sat1	spermidine/spermine N1-acetyl transferase 1	3	0.57225	0.223051	5.13111	0.00716798	0.120843
P936	Mm.126043	Bat1a	HLA-B-associated transcript 1A	3	0.2782	0.108443	5.13082	0.00716909	0.120738
H3009H12	Mm.248640	1200009I06Rik	RIKEN cDNA 1200009I06 gene	3	0.84885	0.331121	5.12712	0.00718332	0.120854
H3010B11	Mm.295031	Ddx27	DEAD (Asp-Glu-Ala-Asp) box polypeptide 27	3	0.532	0.207846	5.11917	0.00721409	0.121248
H3005C03	Mm.74084	BC028768	cDNA sequence BC028768	3	0.50705	0.198128	5.11841	0.00721704	0.121174
H3044E09	Mm.24791	Zw10	ZW10 homolog (Drosophila), centromere/kinetochore protein	3	0.258875	0.101225	5.11483	0.00723095	0.121284
H3096G12			EST	3	1.0722	0.419486	5.11197	0.00724207	0.121347
H3074A11	Mm.289348	Pdhb	pyruvate dehydrogenase (lipoamide) beta	3	0.277225	0.108465	5.11178	0.00724283	0.121236
P863	Mm.3608	Pax6	paired box gene 6	3	0.558775	0.219091	5.10085	0.00728558	0.121828
H3005B03	Mm.210155	Txnrd1	thioredoxin reductase 1	3	0.541275	0.212277	5.0997	0.00729012	0.121781
H3006A04	Mm.2948	H2-Ke2	H2-K region expressed gene 2	3	0.7182	0.281858	5.09619	0.00730392	0.121887
H3142H06	Mm.22700	Gtf2h1	general transcription factor II H, polypeptide 1	3	1.03533	0.406439	5.09461	0.00731015	0.121868
H3108E09	Mm.17640	Psmd10	proteasome (prosome, macropain) 26S subunit, non-ATPase, 10	3	0.568825	0.223339	5.09382	0.00731326	0.121797
H3003G06			EST	3	0.984825	0.386976	5.08986	0.00732894	0.121934
H3089B06	Mm.121918	4921528E07Rik	RIKEN cDNA 4921528E07 gene	3	0.166475	0.065436	5.08821	0.00733545	0.121919
H3134F01	Mm.261634	9430004D19Rik	RIKEN cDNA 9430004D19 gene	3	0.164425	0.064689	5.08352	0.0073541	0.122106
H3046A04			EST	3	0.599425	0.235928	5.08143	0.00736238	0.122121
H3097F01	Mm.38868	Lman2	lectin, mannose-binding 2	3	0.346325	0.136485	5.0749	0.00738845	0.12243
H3100E10	Mm.138332	3110006P09Rik	RIKEN cDNA 3110006P09 gene	3	0.81235	0.320265	5.07299	0.0073961	0.122433
H3100H12	Mm.36683	Eef1e1	eukaryotic translation elongation factor 1 epsilon 1	3	0.604125	0.238318	5.0699	0.00740849	0.122515
H3129E04	Mm.296945	Btbd1	BTB (POZ) domain containing 1	3	0.99785	0.393781	5.06804	0.00741596	0.122516
H3006D03	Mm.244748	D4Ertd196e	DNA segment, Chr 4, ERATO Doi 196, expressed	3	0.349325	0.138033	5.06147	0.00744245	0.12283
H3020B11	Mm.281517	5730598B06	hypothetical protein 5730598B06	3	0.894825	0.353604	5.06116	0.00744369	0.122728
H3024F06	Mm.286591	Shmt1	serine hydroxymethyl transferase 1 (soluble)	3	1.22115	0.48275	5.05914	0.00745186	0.12274
H3019C11	Mm.102752	C1galt1	core 1 UDP-galactose:N-acetylgalactosamine-alpha-R beta 1,3-galactosyltransferase	3	0.5167	0.204315	5.05786	0.00745703	0.122702
H3129F12	Mm.194313	Bves	blood vessel epicardial substance	3	0.529275	0.209302	5.05752	0.00745841	0.122602
H3028F05	Mm.34102	Odc	ornithine decarboxylase, structural	3	1.02137	0.403931	5.05718	0.0074598	0.122503
H3008C12	Mm.38151	Adsl	adenylosuccinate lyase	3	0.6808	0.269299	5.0561	0.0074642	0.122453
H3076B12	Mm.8392	Trappc3	trafficking protein particle complex 3	3	0.81285	0.322099	5.04721	0.00750033	0.122923
H3058A04			EST	3	0.190625	0.075537	5.04718	0.00750045	0.122803
H3042H04	Mm.296868	Rpl27a	ribosomal protein L27a	3	0.51085	0.202538	5.0445	0.00751142	0.122861
H3064A08	Mm.12553	Rfc3	replication factor C (activator 1) 3	3	0.595	0.236233	5.0374	0.00754049	0.123214
H3023B08	Mm.310495		Mus musculus transcribed sequences	3	0.700375	0.278179	5.03543	0.00754861	0.123224
H3008A02	Mm.296082	Slc25a11	solute carrier family 25 (mitochondrial carrier; oxoglutarate carrier), member 11	3	0.268075	0.106541	5.03233	0.00756137	0.12331
H3153F07	Mm.21092	AW742319	expressed sequence AW742319	3	0.511175	0.203251	5.02999	0.00757101	0.123345
H3057E10	Mm.196210	C430041I18Rik	RIKEN cDNA C430041I18 gene	3	0.5203	0.206976	5.02765	0.00758071	0.123381
H3113D10	Mm.28765	Tram1	translocating chain-associating membrane protein 1	3	0.6475	0.2577	5.02522	0.00759076	0.123423
H3059A11	Mm.66222	Cxadr	coxsackievirus and adenovirus receptor	3	1.30202	0.518912	5.01829	0.00761956	0.123769
T115	Mm.43677	Apoa2	apolipoprotein A-II	3	0.090625	0.036182	5.00935	0.00765691	0.124253
H3088H02	Mm.25984		Mus musculus transcribed sequences	3	0.406325	0.162353	5.00544	0.00767332	0.124397
H3118E05	Mm.182631		Mus musculus transcribed sequences	3	0.325675	0.130205	5.00249	0.0076857	0.124475
H3146D06	Mm.5348	Phf7	PHD finger protein 7	3	0.7335	0.293745	4.99412	0.00772108	0.124925
H3029D07	Mm.28203	D11Ertd175e	DNA segment, Chr 11, ERATO Doi 175, expressed	3	0.500475	0.200558	4.99082	0.00773506	0.125029
H3004E07			EST	3	0.489075	0.196096	4.98811	0.00774662	0.125093
H3020G01	Mm.24789	Gdpd1	glycerophosphodiester phosphodiesterase domain containing 1	3	0.802575	0.321931	4.986	0.00775558	0.125115
H3053A08	Mm.214016	Cyp1b1	cytochrome P450, family 1, subfamily b, polypeptide 1	3	0.670175	0.269052	4.98176	0.00777368	0.125284
H3048E10	Mm.155144	Clpx	caseinolytic protease X (E.coli)	3	0.326225	0.130968	4.98175	0.00777374	0.125162
T005			EST	3	0.5508	0.221147	4.98129	0.00777569	0.125072
H3031H10	Mm.253156	Epb4.1l5	erythrocyte protein band 4.1-like 5	3	0.4665	0.187373	4.97938	0.00778385	0.125081
H3105D08	Mm.250167		Mus musculus transcribed sequences	3	0.313125	0.125827	4.97707	0.00779375	0.125118
H3046F10	Mm.261517	Rnf8	ring finger protein 8	3	0.535475	0.215349	4.97309	0.00781086	0.12527
H3052F12			EST	3	1.34925	0.543335	4.96655	0.00783907	0.1256
H3013B08	Mm.260578	Pdxk	pyridoxal (pyridoxine, vitamin B6) kinase	3	0.407775	0.164356	4.96208	0.00785839	0.125788
H3089G11			EST	3	0.25715	0.103713	4.95887	0.00787233	0.125889
H3022F11	Mm.275354	4930470H18Rik	RIKEN cDNA 4930470H18 gene	3	0.3147	0.126979	4.95673	0.00788163	0.125915
H3114B05	Mm.265125	9430077D24Rik	RIKEN cDNA 9430077D24 gene	3	0.412325	0.166535	4.9518	0.00790313	0.126136
H3013C02	Mm.234464	Dnd1	dead end homolog 1 (zebrafish)	3	0.71785	0.289938	4.95175	0.00790337	0.126018
H3054D05	Mm.45272	Hspbap1	Hspb associated protein 1	3	0.71665	0.289562	4.94988	0.00791152	0.126026
H3059E02	Mm.32020	Hrmt1l1	heterogeneous nuclear ribonucleoprotein methyltransferase-like 1 (S. cerevisiae)	3	0.64065	0.258955	4.94797	0.0079199	0.126037
H3066C05	Mm.28029	Ndfip2	Nedd4 family interacting protein 2	3	0.812075	0.328407	4.94554	0.00793054	0.126085
H3020F11	Mm.41271	Stard7	START domain containing 7	3	0.306275	0.123896	4.94407	0.007937	0.126066
H3137H09	Mm.41022	1200009A02Rik	RIKEN cDNA 1200009A02 gene	3	0.59155	0.239438	4.94116	0.0079498	0.126148
H3002H11			EST	3	0.47505	0.192339	4.9397	0.0079562	0.126128
H3035C11			EST	3	0.737925	0.299118	4.934	0.00798139	0.126405
H3113D11	Mm.214932	Rnf144	ring finger protein 144	3	1.18073	0.478726	4.93278	0.00798679	0.126369
H3105F07	Mm.128627	Dnclic1	dynein, cytoplasmic, light intermediate chain 1	3	0.6044	0.245248	4.92889	0.00800405	0.126521
H3014D01	Mm.254588	Cltc	clathrin, heavy polypeptide (Hc)	3	0.656425	0.266518	4.92593	0.00801719	0.126607
H3052A03	Mm.17853		Mus musculus similar to potassium channel regulator 1 (LOC380959), mRNA	3	0.77975	0.316646	4.92505	0.0080211	0.126547
H3040D05	Mm.292470	AA545217	expressed sequence AA545217	3	0.754575	0.306641	4.92156	0.00803668	0.126672
H3072G01	Mm.274086	Kif18a	kinesin family member 18A	3	0.62215	0.252839	4.92131	0.00803777	0.126568
H3083C11	Mm.284984	Ywhag	3-monooxgenase/tryptophan 5-monooxgenase activation protein, gamma polypeptide	3	0.92495	0.376075	4.91896	0.00804829	0.126613
H3074E09			EST	3	0.3931	0.159882	4.91737	0.00805539	0.126603
H3157C04	Mm.4215	Cat	catalase	3	0.4343	0.176672	4.91645	0.00805954	0.126548
H3005F01	Mm.168854	D5Wsu178e	DNA segment, Chr 5, Wayne State University 178, expressed	3	1.08007	0.439813	4.91152	0.00808166	0.126774
H3127E04	Mm.279861	1810060D16Rik	RIKEN cDNA 1810060D16 gene	3	0.35015	0.142607	4.9107	0.00808534	0.126711
H3141D02	Mm.7978	Efna5	ephrin A5	3	0.6963	0.283706	4.90861	0.00809476	0.126738
H3136C02	Mm.289791	1110001A23Rik	RIKEN cDNA 1110001A23 gene	3	0.4839	0.197203	4.90764	0.00809913	0.126686
H3054F08	Mm.310063		Mus musculus transcribed sequences	3	0.36295	0.147922	4.90731	0.0081006	0.126589
H3085H12			EST	3	0.79945	0.326031	4.90414	0.00811492	0.126693
H3063G01	Mm.281732	AF424697	DNA sequence AF424697	3	0.823625	0.336058	4.90168	0.00812604	0.126746
H3081H04	Mm.275279	Fbxl6	F-box and leucine-rich repeat protein 6	3	0.599175	0.24471	4.89701	0.00814723	0.126957
H3107B12	Mm.23881	1600002H07Rik	RIKEN cDNA 1600002H07 gene	3	0.775425	0.316748	4.89616	0.00815112	0.126897
H3134D02	Mm.209503	2610511O17Rik	RIKEN cDNA 2610511O17 gene	3	1.0127	0.413714	4.89565	0.00815343	0.126813
H3045G03	Mm.172811		Mus musculus transcribed sequences	3	0.480875	0.196463	4.89532	0.00815493	0.126717
T160	Mm.248907	Map2k1	mitogen activated protein kinase kinase 1	3	0.624975	0.255444	4.89325	0.00816435	0.126744
H3070E01	Mm.15928	Preb	prolactin regulatory element binding	3	0.7037	0.287673	4.89236	0.0081684	0.126687
H3065C02	Mm.41800	Gtpbp4	GTP binding protein 4	3	0.5553	0.227065	4.89112	0.00817407	0.126656
H3108A02	Mm.26834	1110008L20Rik	RIKEN cDNA 1110008L20 gene	3	0.2698	0.110516	4.88253	0.00821339	0.127145
H3039G09	Mm.172702		Mus musculus transcribed sequences	3	0.3291	0.134841	4.8813	0.00821904	0.127113
H3101A09	Mm.290816	2810453I06Rik	RIKEN cDNA 2810453I06 gene	3	0.76575	0.313898	4.87897	0.00822976	0.12716
H3137B11	Mm.314183	Mest	mesoderm specific transcript	3	0.5005	0.205205	4.87805	0.00823402	0.127106
H3126C06	Mm.29615	2610001J05Rik	RIKEN cDNA 2610001J05 gene	3	0.5726	0.234871	4.87586	0.00824408	0.127143
H3055D05	Mm.205421	F730017H24Rik	RIKEN cDNA F730017H24 gene	3	0.1674	0.068698	4.8735	0.00825499	0.127192
H3037D06	Mm.26040	2610207P08Rik	RIKEN cDNA 2610207P08 gene	3	0.5934	0.243597	4.87199	0.00826198	0.12718
H3073G01	Mm.29112	Wbscr22	Williams Beuren syndrome chromosome region 22	3	0.584025	0.239806	4.87082	0.00826742	0.127145
H3114A05	Mm.297465		Mus musculus similar to Phospholipid hydroperoxide glutathione peroxidase, mitochondrial precursor (PHGPx) (GPX-4) (LOC380677), mRNA	3	0.32205	0.13233	4.86738	0.00828335	0.127271
H3012H04	Mm.29947	Stk11	serine/threonine kinase 11	3	0.500225	0.20562	4.86553	0.00829196	0.127285
T405	Mm.38674	Sytl4	synaptotagmin-like 4	3	1.47277	0.606467	4.8569	0.00833218	0.127783
H3076G12	Mm.196210	C430041I18Rik	RIKEN cDNA C430041I18 gene	3	0.58475	0.240905	4.85461	0.0083429	0.127829
H3053D09	Mm.210403	BC018601	cDNA sequence BC018601	3	0.6288	0.25907	4.85428	0.00834448	0.127734
H3089B03	Mm.29998	0610039C21Rik	RIKEN cDNA 0610039C21 gene	3	0.730825	0.30135	4.85034	0.00836297	0.127898
T230	Mm.25613	Ier3	immediate early response 3	3	1.23843	0.510772	4.84923	0.00836819	0.127859
H3090H08	Mm.21182	E330021D16Rik	RIKEN cDNA E330021D16 gene	3	0.39085	0.161245	4.8479	0.00837444	0.127836
H3058G01	Mm.24838	2810003C17Rik	RIKEN cDNA 2810003C17 gene	3	1.04547	0.43157	4.84499	0.00838818	0.127927
H3021H03	Mm.905	Rsu1	Ras suppressor protein 1	3	0.4958	0.204798	4.84184	0.00840306	0.128036
H3130C07	Mm.100617	2810036K01Rik	RIKEN cDNA 2810036K01 gene	3	0.438675	0.181451	4.83519	0.00843461	0.128398
H3056E05	Mm.290066	MGC60849	similar to hypothetical protein MGC20481	3	0.4292	0.177569	4.83417	0.00843944	0.128353
H3086G08	Mm.218846	Lbp	lipopolysaccharide binding protein	3	0.95115	0.393586	4.83325	0.00844383	0.128301
P036	Mm.465	Cxcl12	chemokine (C-X-C motif) ligand 12	3	2.01363	0.833248	4.83319	0.00844408	0.128187
H3079C06	Mm.26216		Mus musculus transcribed sequences	3	0.45415	0.188041	4.83033	0.00845771	0.128275
H3102D08	Mm.2053	5830427H10Rik	RIKEN cDNA 5830427H10 gene	3	0.501	0.207809	4.82173	0.00849891	0.128782
P835	Mm.39094	Nog	noggin	3	0.22795	0.094563	4.8211	0.00850191	0.128709
H3075H03	Mm.266885	D11Ertd736e	DNA segment, Chr 11, ERATO Doi 736, expressed	3	0.846175	0.351118	4.81989	0.00850771	0.128678
H3026B04	Mm.202337	Ppat	phosphoribosyl pyrophosphate amidotransferase	3	0.8331	0.345736	4.81929	0.00851062	0.128604
H3060C11	Mm.209917	Smox	spermine oxidase	3	0.3575	0.148428	4.81715	0.00852092	0.128642
H3023A12	Mm.209730	C730024G01Rik	RIKEN cDNA C730024G01 gene	3	0.26245	0.109113	4.81063	0.00855242	0.128999
H3046F05	Mm.143166	Nif3l1	Ngg1 interacting factor 3-like 1 (S. pombe)	3	1.19405	0.496486	4.81	0.00855543	0.128926
H3007A02	Mm.29484	Mrps18b	mitochondrial ribosomal protein S18B	3	0.899025	0.373849	4.80957	0.00855756	0.128841
H3010D04	Mm.34564	0610009O03Rik	RIKEN cDNA 0610009O03 gene	3	0.487925	0.202922	4.80899	0.00856035	0.128765
H3078C02	Mm.292021	4921532K09Rik	RIKEN cDNA 4921532K09 gene	3	0.35715	0.148656	4.80507	0.00857938	0.128933
H3016B08	Mm.38055	Es10	esterase 10	3	0.4305	0.179309	4.80176	0.00859547	0.129057
T052	Mm.291743	Dci	dodecenoyl-Coenzyme A delta isomerase (3,2 trans-enoyl-Coenyme A isomerase)	3	0.269275	0.112207	4.7996	0.00860602	0.129098
H3126A04	Mm.3862	Igf2	insulin-like growth factor 2	3	1.11827	0.466017	4.79929	0.00860754	0.129003
H3100C06	Mm.289248	2610301I15Rik	RIKEN cDNA 2610301I15 gene	3	0.24715	0.103187	4.79034	0.00865134	0.129542
H3068E09			EST	3	0.50695	0.211684	4.78969	0.00865457	0.129473
H3083A04	Mm.280125	Crk	v-crk sarcoma virus CT10 oncogene homolog (avian)	3	0.454625	0.189884	4.78845	0.00866065	0.129446
H3079H03	Mm.37822		Mus musculus transcribed sequences	3	0.35265	0.147712	4.77482	0.00872804	0.130335
H3041G07	Mm.172732		Mus musculus transcribed sequences	3	0.224625	0.094145	4.77187	0.00874272	0.130436
H3127C08	Mm.283668		Mus musculus 2 days neonate thymus thymic cells cDNA, RIKEN full-length enriched library, clone:E430026H10 product:unknown EST, full insert sequence	3	0.373175	0.15657	4.76689	0.00876759	0.130689
H3006G04	Mm.174044	2700050L05Rik	RIKEN cDNA 2700050L05 gene	3	0.452475	0.189845	4.76678	0.00876812	0.130578
H3043E03	Mm.88235		Mus musculus transcribed sequence with strong similarity to protein pir:T08738 (H.sapiens) T08738 hypothetical protein DKFZp586E0518.1 - human (fragment)	3	0.2259	0.094824	4.76461	0.00877897	0.130622
H3009B05	Mm.296868	Rpl27a	ribosomal protein L27a	3	0.3589	0.15075	4.76152	0.00879446	0.130734
H3158B06	Mm.292108	Dr1	down-regulator of transcription 1	3	0.729425	0.306562	4.75874	0.00880842	0.130824
H3106H10	Mm.276502	1190005P08Rik	RIKEN cDNA 1190005P08 gene	3	0.796575	0.334944	4.75646	0.0088199	0.130876
H3026A11	Mm.29164	2310021G01Rik	RIKEN cDNA 2310021G01 gene	3	0.80495	0.338521	4.75569	0.00882379	0.130816
P128	Mm.213873	Itgb4	integrin beta 4	3	0.488475	0.205435	4.75551	0.00882468	0.130712
H3018A11	Mm.1262	Cyp17a1	cytochrome P450, family 17, subfamily a, polypeptide 1	3	0.27005	0.113591	4.7548	0.00882829	0.130648
H3024F03	Mm.30072	Cox7a2l	cytochrome c oxidase subunit VIIa polypeptide 2-like	3	0.8605	0.362008	4.75404	0.00883211	0.130587
H3088G12	Mm.98697		Mus musculus 0 day neonate thymus cDNA, RIKEN full-length enriched library, clone:A430075J01 product:unknown EST, full insert sequence	3	0.39935	0.168047	4.75284	0.00883817	0.130559
H3067E01	Mm.298110	Eef1a1	eukaryotic translation elongation factor 1 alpha 1	3	0.414925	0.174712	4.74981	0.00885352	0.130669
H3056G05	Mm.221041	R3hdm	R3H domain (binds single-stranded nucleic acids)	3	0.18095	0.076246	4.74646	0.00887048	0.130802
H3150G02	Mm.28379	Nup50	nucleoporin 50	3	0.78875	0.332469	4.7448	0.0088789	0.130809
H3158E09	Mm.274589	Pot1	POT1-like telomere end-binding protein (S. pombe)	3	0.494975	0.208725	4.74285	0.00888884	0.130838
H3064E08	Mm.278588	Cyp7b1	cytochrome P450, family 7, subfamily b, polypeptide 1	3	0.660825	0.278753	4.74129	0.00889678	0.130838
T268	Mm.200775	Tgfbr3	transforming growth factor, beta receptor III	3	1.14505	0.483353	4.73794	0.00891385	0.130972
H3152B03	Mm.57057		Mus musculus 10 days neonate cerebellum cDNA, RIKEN full-length enriched library, clone:6530411F08 product:enhancer trap locus 1, full insert sequence	3	0.333475	0.140941	4.73212	0.00894365	0.131293
H3084D03	Mm.233587	Mgat4a	mannoside acetylglucosaminyltransferase 4, isoenzyme A	3	0.24845	0.105068	4.72932	0.00895802	0.131387
H3009A04	Mm.219429	Serpinb9c	serine (or cysteine) proteinase inhibitor, clade B, member 9c	3	0.89115	0.377056	4.72689	0.00897057	0.131454
H3015H09	Mm.284605	Srr	serine racemase	3	0.61845	0.261705	4.72631	0.00897355	0.131381
H3024A10	Mm.20837	Cln2	ceroid-lipofuscinosis, neuronal 2	3	0.4556	0.192857	4.72473	0.00898166	0.131383
H3135G06	Mm.31259	Aof1	amine oxidase, flavin containing 1	3	1.00473	0.425539	4.72213	0.00899511	0.131463
H3083C07	Mm.288674	LOC219114	similar to chromosome 13 open reading frame 3	3	0.663725	0.281151	4.72149	0.00899842	0.131394
H3023F06	Mm.296789	Lysal2	lysosomal apyrase-like 2	3	0.36165	0.153244	4.71992	0.00900653	0.131396
H3105C03	Mm.5915	2410012M04Rik	RIKEN cDNA 2410012M04 gene	3	0.6399	0.271169	4.71956	0.00900841	0.131308
T421	Mm.56946	Pou3f4	POU domain, class 3, transcription factor 4	3	0.399175	0.16933	4.71476	0.00903332	0.131554
H3099G08	Mm.11480	2810470K21Rik	RIKEN cDNA 2810470K21 gene	3	0.558725	0.237148	4.71203	0.00904749	0.131644
H3076G10	Mm.246435	Tomm22	translocase of outer mitochondrial membrane 22 homolog (yeast)	3	0.4038	0.172041	4.69423	0.00914083	0.132885
H3045H02	Mm.19039	Got1	glutamate oxaloacetate transaminase 1, soluble	3	0.365525	0.155758	4.69349	0.00914472	0.132824
H3011E10	Mm.288873	Arpc1a	actin related protein 2/3 complex, subunit 1A	3	0.6596	0.281239	4.69067	0.00915964	0.132924
P445	Mm.86755	Fzd4	frizzled homolog 4 (Drosophila)	3	0.8346	0.35606	4.68798	0.00917389	0.133013
P517	Mm.19904	Bax	Bcl2-associated X protein	3	0.665675	0.284082	4.6865	0.00918175	0.13301
H3063E12	Mm.262000	Ptp4a1	protein tyrosine phosphatase 4a1	3	0.763225	0.325858	4.6844	0.00919291	0.133055
H3065G12	Mm.253156	Epb4.1l5	erythrocyte protein band 4.1-like 5	3	0.495975	0.211764	4.68422	0.00919384	0.132951
H3018F07	Mm.276859	Coro1b	coronin, actin binding protein 1B	3	0.3644	0.155592	4.68404	0.00919483	0.132849
H3106E04	Mm.18803	Timm22	translocase of inner mitochondrial membrane 22 homolog (yeast)	3	0.577125	0.246534	4.68191	0.00920613	0.132896
H3034H07			EST	3	0.415975	0.177745	4.68058	0.00921324	0.132882
H3037H07			EST	3	0.2497	0.106773	4.67721	0.00923121	0.133025
H3141G11	Mm.182758		Mus musculus transcribed sequences	3	0.24665	0.105544	4.67386	0.00924915	0.133167
H3133D06	Mm.21535	Grpel1	GrpE-like 1, mitochondrial	3	0.455925	0.195145	4.67267	0.00925551	0.133142
H3083B08	Mm.25966		Mus musculus similar to ALY (LOC226957), mRNA	3	0.315325	0.135008	4.6712	0.00926342	0.133139
H3006D02	Mm.30866		Mus musculus transcribed sequences	3	0.594075	0.254389	4.67061	0.00926658	0.133069
P722	Mm.30837	Ndr1	N-myc downstream regulated 1	3	0.549575	0.235337	4.67054	0.00926699	0.132959
H3058A12	Mm.9757	Pde8a	phosphodiesterase 8A	3	0.609375	0.261012	4.66933	0.00927347	0.132936
H3090C08	Mm.250214	Oazin	ornithine decarboxylase antizyme inhibitor	3	0.614475	0.26367	4.66094	0.0093187	0.133468
H3100B09	Mm.174018		Mus musculus transcribed sequences	3	0.3365	0.144394	4.66087	0.00931909	0.133358
H3100B08	Mm.241604	1110060F11Rik	RIKEN cDNA 1110060F11 gene	3	0.42625	0.182911	4.66073	0.00931989	0.133253
H3001G10			EST	3	0.16345	0.070146	4.66027	0.00932236	0.133173
H3124E04	Mm.465	Cxcl12	chemokine (C-X-C motif) ligand 12	3	2.436	1.04622	4.65675	0.00934146	0.13333
H3094D10	Mm.173364		Mus musculus transcribed sequences	3	0.382075	0.164111	4.6563	0.00934388	0.133249
H3124F10	Mm.21853	Pxmp2	peroxisomal membrane protein 2	3	0.68005	0.292173	4.65512	0.00935026	0.133225
P493	Mm.4481	Il17r	interleukin 17 receptor	3	0.3999	0.171896	4.65282	0.00936281	0.133289
H3098D12	Mm.248907	Map2k1	mitogen activated protein kinase kinase 1	3	0.83225	0.357838	4.65154	0.00936976	0.133272
H3014H02	Mm.101586	0610011N22Rik	RIKEN cDNA 0610011N22 gene	3	0.4418	0.190004	4.65043	0.00937583	0.133244
H3091F02	Mm.18203	Eed	embryonic ectoderm development	3	0.955025	0.410801	4.64958	0.00938049	0.133195
H3105A02	Mm.23217	1600019D15Rik	RIKEN cDNA 1600019D15 gene	3	0.7889	0.339418	4.64854	0.00938614	0.13316
H3093C01	Mm.249405	Mageb3	melanoma antigen, family B, 3	3	0.57105	0.245887	4.64481	0.00940655	0.133335
H3081A07	Mm.290704	C330007P06Rik	RIKEN cDNA C330007P06 gene	3	0.4857	0.209168	4.64412	0.00941035	0.133274
H3020F01	Mm.260578	Pdxk	pyridoxal (pyridoxine, vitamin B6) kinase	3	0.482925	0.208164	4.63985	0.00943375	0.133491
H3082C04	Mm.248938	AU019489	expressed sequence AU019489	3	1.4759	0.636221	4.63959	0.00943523	0.133397
H3079F04	Mm.49826	0610027A18Rik	RIKEN cDNA 0610027A18 gene	3	0.3149	0.135855	4.63582	0.00945595	0.133575
H3075C05	Mm.275013	Eif5	eukaryotic translation initiation factor 5	3	0.875775	0.378271	4.63041	0.00948588	0.133883
H3095G09			EST	3	0.300325	0.129891	4.62425	0.00952004	0.13425
H3008G09	Mm.45418	2700094F01Rik	RIKEN cDNA 2700094F01 gene	3	0.895175	0.387183	4.62404	0.00952125	0.134153
H3135F06	Mm.296383	Hspca	heat shock protein 1, alpha	3	0.52795	0.228363	4.62377	0.0095227	0.134059
H3113E07	Mm.276572	Rras2	related RAS viral (r-ras) oncogene homolog 2	3	0.9886	0.427917	4.62052	0.00954081	0.134199
H3046H11	Mm.211838	Slc5a10	solute carrier family 5 (sodium/glucose cotransporter), member 10	3	0.345125	0.149423	4.61944	0.00954685	0.134169
H3040B02	Mm.205045	Ddx41	DEAD (Asp-Glu-Ala-Asp) box polypeptide 41	3	0.407525	0.176456	4.61899	0.00954937	0.13409
H3013D03	Mm.74596	Rab10	RAB10, member RAS oncogene family	3	0.334575	0.144881	4.61862	0.00955147	0.134005
H3084D09	Mm.235642	D330024H06Rik	RIKEN cDNA D330024H06 gene	3	0.7615	0.32987	4.61697	0.00956065	0.13402
H3031G02	Mm.253614	Ppil2	peptidylprolyl isomerase (cyclophilin)-like 2	3	0.24205	0.104959	4.61228	0.00958696	0.134275
H3069G07	Mm.27404	1110002A21Rik	RIKEN cDNA 1110002A21 gene	3	0.27835	0.120827	4.60741	0.00961434	0.134544
H3058G02	Mm.18154	Tcl1	T-cell lymphoma breakpoint 1	3	0.136775	0.059439	4.60219	0.00964383	0.134842
H3106D09	Mm.27701	Arhd	ras homolog gene family, member D	3	0.58075	0.252509	4.59985	0.0096571	0.134913
H3050H05	Mm.254820	Smug1	single-strand selective monofunctional uracil DNA glycosylase	3	0.69315	0.301386	4.59974	0.00965768	0.134807
H3023F09	Mm.296119	Gnpda1	glucosamine-6-phosphate deaminase 1	3	0.571725	0.248798	4.5959	0.0096795	0.134997
H3136B08	Mm.6343	Npm1	nucleophosmin 1	3	0.360725	0.157047	4.59384	0.00969124	0.135046
H3019H02	Mm.186	1300011C24Rik	RIKEN cDNA 1300011C24 gene	3	0.370475	0.161297	4.59369	0.00969208	0.134944
H3023G01	Mm.296383	Hspca	heat shock protein 1, alpha	3	0.52515	0.228739	4.59169	0.00970345	0.134988
H3134A07	Mm.103029		Mus musculus transcribed sequences	3	0.2625	0.114432	4.58789	0.00972515	0.135176
H3081D08	Mm.299471	Rab5a	RAB5A, member RAS oncogene family	3	0.613925	0.267799	4.58497	0.00974187	0.135294
H3067A09	Mm.279116	2410004E01Rik	RIKEN cDNA 2410004E01 gene	3	0.6735	0.29389	4.58335	0.00975116	0.135309
H3080A10			EST	3	0.499675	0.21804	4.58332	0.00975133	0.135197
H3083A01	Mm.173188		Mus musculus transcribed sequences	3	0.141525	0.061787	4.58106	0.00976437	0.135264
H3011A11	Mm.243234	Psmd2	proteasome (prosome, macropain) 26S subunit, non-ATPase, 2	3	0.41155	0.179758	4.57893	0.00977659	0.135319
H3063A09	Mm.248291	Rassf5	Ras association (RalGDS/AF-6) domain family 5	3	0.6916	0.302122	4.57828	0.00978036	0.135258
H3100D08	Mm.260893	2610040C18Rik	RIKEN cDNA 2610040C18 gene	3	0.66765	0.291856	4.57521	0.00979806	0.135389
H3147G07	Mm.41865	Lsm10	U7 snRNP-specific Sm-like protein LSM10	3	0.49925	0.218311	4.57374	0.00980654	0.135393
H3016A12	Mm.28221	AW544865	expressed sequence AW544865	3	0.559575	0.244701	4.57354	0.00980772	0.135296
H3010A10	Mm.196538	Rps11	ribosomal protein S11	3	0.25925	0.113601	4.56424	0.00986167	0.135926
H3030B08	Mm.244236	6030436C20Rik	RIKEN cDNA 6030436C20 gene	3	0.236125	0.10348	4.56368	0.00986496	0.135858
H3005B06	Mm.202337	Ppat	phosphoribosyl pyrophosphate amidotransferase	3	0.664675	0.291375	4.56234	0.00987277	0.135852
H3008A10	Mm.147946	Mybbp1a	MYB binding protein (P160) 1a	3	0.704325	0.308808	4.56157	0.00987723	0.1358
H3152F04	Mm.22699	Sepp1	selenoprotein P, plasma, 1	3	1.56832	0.688128	4.55823	0.00989673	0.135954
H3136E02	Mm.27553	9530019H02Rik	RIKEN cDNA 9530019H02 gene	3	0.346175	0.152007	4.55471	0.00991737	0.136124
H3146B12	Mm.153226	Gdi3	guanosine diphosphate (GDP) dissociation inhibitor 3	3	0.38325	0.168358	4.55279	0.00992867	0.136166
H3100H11	Mm.158477		Mus musculus adult male testis cDNA, RIKEN full-length enriched library, clone:4921525D07 product:unknown EST, full insert sequence	3	0.425475	0.187064	4.54898	0.00995107	0.136359
H3001B06	Mm.276096	9330177P20Rik	RIKEN cDNA 9330177P20 gene	3	0.48715	0.214332	4.54576	0.00997008	0.136506
H3077B02	Mm.228433	Slc12a2	solute carrier family 12, member 2	3	0.648775	0.285611	4.54307	0.00998598	0.136611
H3156F03	Mm.263894	2510048K03Rik	RIKEN cDNA 2510048K03 gene	3	0.373	0.164213	4.54289	0.00998706	0.136512
H3023E08	Mm.289775		Mus musculus transcribed sequence with weak similarity to protein pir:PIHUB6 (H.sapiens) PIHUB6 salivary proline-rich protein precursor PRB1 (large allele) - human	3	0.93505	0.411655	4.54288	0.00998712	0.1364
H3132A05	Mm.290829	Rfc2	replication factor C (activator 1) 2	3	0.4719	0.207937	4.53888	0.0100108	0.13661
H3147G05	Mm.290772	Rpl7	ribosomal protein L7	3	0.286925	0.126565	4.53402	0.0100397	0.136891
H3044C09	Mm.781	Gt(ROSA)26asSor	gene trap ROSA 26 antisense, Philippe Soriano	3	0.39805	0.175594	4.53375	0.0100414	0.1368
H3076C01	Mm.249076	1200009I24Rik	RIKEN cDNA 1200009I24 gene	3	0.5159	0.227781	4.52978	0.010065	0.137009
H3150F12	Mm.150686	1110013J05Rik	RIKEN cDNA 1110013J05 gene	3	0.493025	0.217843	4.52643	0.0100851	0.137169
H3014C02	Mm.247762	2610301D06Rik	RIKEN cDNA 2610301D06 gene	3	0.366775	0.162063	4.52633	0.0100857	0.137064
H3092F02			EST	3	0.379675	0.167805	4.5252	0.0100925	0.137043
P915	Mm.272264	Stx3	syntaxin 3	3	0.367075	0.162407	4.52042	0.0101212	0.13732
H3048F06	Mm.267956		Mus musculus 0 day neonate eyeball cDNA, RIKEN full-length enriched library, clone:E130112C09 product:unclassifiable, full insert sequence	3	0.533425	0.236041	4.51977	0.0101252	0.13726
H3113H08	Mm.12665	Cul3	cullin 3	3	0.514775	0.227833	4.51888	0.0101305	0.137221
H3066G01			EST	3	0.3269	0.144738	4.51712	0.0101412	0.137252
H3094E07	Mm.290407	Nap1l1	nucleosome assembly protein 1-like 1	3	0.69455	0.307666	4.51496	0.0101542	0.137315
H3155C12	Mm.51988	1110054O05Rik	RIKEN cDNA 1110054O05 gene	3	0.199075	0.088187	4.51485	0.0101548	0.137211
H3111C05	Mm.17917	D4Wsu27e	DNA segment, Chr 4, Wayne State University 27, expressed	3	0.597925	0.265059	4.51164	0.0101743	0.137361
H3049H12	Mm.1387	Rab11a	RAB11a, member RAS oncogene family	3	0.4795	0.212643	4.5099	0.0101849	0.137391
H3002C11	Mm.154564	E130307C13	hypothetical protein E130307C13	3	0.47645	0.211462	4.50624	0.0102071	0.137579
H3038E02			EST	3	0.086375	0.038344	4.50522	0.0102133	0.13755
H3105E07	Mm.282556	Npc2	Niemann Pick type C2	3	0.4546	0.201946	4.50218	0.0102318	0.137687
H3120C07	Mm.40298	A530090O15Rik	RIKEN cDNA A530090O15 gene	3	0.96055	0.426721	4.502	0.0102329	0.137589
T017	Mm.58836	Cs	citrate synthase	3	0.1874	0.083254	4.5019	0.0102336	0.137486
H3103E02			EST	3	0.465425	0.206777	4.50171	0.0102347	0.137389
H3154C07			EST	3	0.311875	0.13867	4.4981	0.0102569	0.137574
H3118B02			EST	3	0.44865	0.199633	4.49475	0.0102774	0.137737
H3069B02	Mm.104531	1810037G04Rik	RIKEN cDNA 1810037G04 gene	3	0.3563	0.158543	4.49467	0.0102779	0.137632
H3016D12	Mm.154378	Ncl	nucleolin	3	0.685575	0.30545	4.48895	0.0103131	0.137991
H3022E02	Mm.246869	8430423A01Rik	RIKEN cDNA 8430423A01 gene	3	0.53735	0.239465	4.48791	0.0103195	0.137965
P690	Mm.3862	Igf2	insulin-like growth factor 2	3	1.19552	0.532994	4.48607	0.0103309	0.138005
H3106D07	Mm.1022	Cdc42	cell division cycle 42 homolog (S. cerevisiae)	3	0.2208	0.098494	4.48354	0.0103466	0.138103
H3021E08	Mm.34246	Calm1	calmodulin 1	3	0.378325	0.16884	4.48147	0.0103594	0.138162
H3070E06			EST	3	0.565825	0.252523	4.48137	0.01036	0.138058
H3087A01	Mm.27955	Wbscr1	Williams-Beuren syndrome chromosome region 1 homolog (human)	3	0.36495	0.162904	4.48054	0.0103652	0.138015
H3061H12			EST	3	0.290125	0.129556	4.47876	0.0103763	0.138051
H3031G05	Mm.272533	Gtf2h2	general transcription factor II H, polypeptide 2	3	0.81585	0.364408	4.47768	0.010383	0.138029
H3113F08	Mm.11780	Tm7sf1	transmembrane 7 superfamily member 1	3	1.48877	0.665508	4.4741	0.0104053	0.138214
H3040C09	Mm.259617	Eif3s10	eukaryotic translation initiation factor 3, subunit 10 (theta)	3	0.1316	0.058833	4.47369	0.0104078	0.138137
H3086B09	Mm.69380	Tmc7	transmembrane channel-like gene family 7	3	0.294775	0.131797	4.47317	0.0104111	0.138069
H3153G08	Mm.1972	Rac2	RAS-related C3 botulinum substrate 2	3	0.501625	0.224282	4.47315	0.0104112	0.137959
H3016E02	Mm.4172	Slbp	stem-loop binding protein	3	0.739025	0.33058	4.47109	0.0104242	0.138019
T399	Mm.283278	Napa	N-ethylmaleimide sensitive fusion protein attachment protein alpha	3	0.23475	0.105075	4.46824	0.010442	0.138145
H3098A12	Mm.30239	Slc39a8	solute carrier family 39 (metal ion transporter), member 8	3	0.517725	0.231749	4.46798	0.0104436	0.138055
H3065D03			EST	3	0.94325	0.422229	4.46796	0.0104437	0.137946
H3147G04	Mm.290772	Rpl7	ribosomal protein L7	3	0.254975	0.114142	4.46769	0.0104454	0.137858
H3075E06	Mm.2752	Prlr	prolactin receptor	3	0.7106	0.318284	4.46519	0.0104611	0.137955
H3144G07	Mm.280225	Ovol1	OVO homolog-like 1 (Drosophila)	3	0.337275	0.15109	4.46454	0.0104652	0.137898
H3109B08	Mm.28506	Slc15a4	solute carrier family 15, member 4	3	1.13823	0.509983	4.46378	0.01047	0.137851
H3058A02	Mm.281490	Bmp2k	BMP2 inducible kinase	3	0.353725	0.158514	4.463	0.0104749	0.137805
H3103B11			EST	3	0.252375	0.113098	4.46294	0.0104753	0.1377
H3018E03	Mm.30237	Psmd9	proteasome (prosome, macropain) 26S subunit, non-ATPase, 9	3	0.64085	0.28741	4.45948	0.0104971	0.137877
H3007E12			EST	3	0.806125	0.361761	4.45667	0.0105149	0.138
H3017G01	Mm.294520	Twistnb	TWIST neighbor	3	0.589075	0.264617	4.45228	0.0105427	0.138255
H3078G05	Mm.155231		Mus musculus transcribed sequences	3	0.1324	0.059485	4.45158	0.0105472	0.138204
H3139A09	Mm.271784	Psph	phosphoserine phosphatase	3	0.3898	0.175156	4.45089	0.0105515	0.138151
H3041A07			EST	3	0.390425	0.175611	4.44649	0.0105796	0.138408
H3085G07	Mm.146873	0610039N19Rik	RIKEN cDNA 0610039N19 gene	3	0.2794	0.125696	4.44564	0.010585	0.13837
H3025E05	Mm.270472	Xab1	XPA binding protein 1	3	0.451375	0.203108	4.44467	0.0105912	0.13834
H3011D06	Mm.3863	Por	P450 (cytochrome) oxidoreductase	3	0.614325	0.276514	4.44335	0.0105996	0.138341
H3116A12	Mm.150856	Hmg20a	high mobility group 20A	3	0.36625	0.164861	4.44313	0.010601	0.13825
H3065E03	Mm.9925	Idh1	isocitrate dehydrogenase 1 (NADP+), soluble	3	0.36385	0.163872	4.44066	0.0106168	0.138347
H3077H01	Mm.276536	Timm8b	translocase of inner mitochondrial membrane 8 homolog b (yeast)	3	0.424275	0.19114	4.4394	0.0106249	0.138342
H3008D05	Mm.199964	D10Ertd438e	DNA segment, Chr 10, ERATO Doi 438, expressed	3	1.11928	0.504705	4.43536	0.0106509	0.138571
H3152A08	Mm.288809	G22p1	thyroid autoantigen	3	0.894875	0.403565	4.43485	0.0106542	0.138504
H3100G10	Mm.173989		Mus musculus transcribed sequences	3	0.315975	0.142574	4.43243	0.0106698	0.138598
H3111E06	Mm.7044	Acas2l	acetyl-Coenzyme A synthetase 2 (AMP forming)-like	3	0.16905	0.076293	4.43162	0.010675	0.138556
H3028B07	Mm.219676	9130404D14Rik	RIKEN cDNA 9130404D14 gene	3	0.1835	0.082824	4.4311	0.0106783	0.13849
H3013C04	Mm.40828	Sqstm1	sequestosome 1	3	0.71325	0.321985	4.43033	0.0106833	0.138446
H3085F08			EST	3	0.28655	0.129377	4.42967	0.0106876	0.138392
H3047E11	Mm.275894	E430019N21Rik	RIKEN cDNA E430019N21 gene	3	0.364575	0.16473	4.42634	0.0107091	0.138562
H3074F11	Mm.247080	Lsm7	LSM7 homolog, U6 small nuclear RNA associated (S. cerevisiae)	3	0.356075	0.16099	4.42357	0.0107271	0.138686
H3014D12	Mm.40802	2810480G15Rik	Riken cDNA 2810480G15 gene	3	0.571425	0.258694	4.41777	0.0107649	0.139065
H3035H09	Mm.64579	2810036L13Rik	RIKEN cDNA 2810036L13 gene	3	0.406025	0.183837	4.41722	0.0107684	0.139002
H3077G04	Mm.26564	Osbpl11	oxysterol binding protein-like 11	3	0.299	0.135392	4.41681	0.0107711	0.138928
H3015C01	Mm.17	Bcap31	B-cell receptor-associated protein 31	3	0.282575	0.128078	4.41256	0.0107989	0.139178
H3061A06	Mm.56337	Pafah1b1	platelet-activating factor acetylhydrolase, isoform 1b, beta1 subunit	3	0.199025	0.090291	4.40854	0.0108253	0.139409
H3127E12	Mm.236835	Fez2	fasciculation and elongation protein zeta 2 (zygin II)	3	0.69655	0.316062	4.40769	0.0108309	0.139372
H3008D09	Mm.270382	2610311I19Rik	RIKEN cDNA 2610311I19 gene	3	0.326675	0.14852	4.39906	0.0108878	0.139995
H3047H07			EST	3	0.723475	0.32898	4.39829	0.010893	0.139952
H3062G11	Mm.292470	AA545217	expressed sequence AA545217	3	0.764725	0.347762	4.39798	0.010895	0.139869
H3089A11	Mm.21629	Abcf2	ATP-binding cassette, sub-family F (GCN20), member 2	3	0.6663	0.30302	4.39773	0.0108967	0.139781
H3077G03	Mm.30042	Pank4	pantothenate kinase 4	3	0.5865	0.267063	4.39222	0.0109332	0.140141
H3006A02	Mm.246683	1700023O11Rik	RIKEN cDNA 1700023O11 gene	3	0.572775	0.261076	4.3878	0.0109627	0.14041
H3024F09	Mm.2941	Mttp	microsomal triglyceride transfer protein	3	0.6282	0.286346	4.3877	0.0109634	0.140309
H3131G06	Mm.240044	Ube2i	ubiquitin-conjugating enzyme E2I	3	0.32575	0.148495	4.38734	0.0109658	0.140231
H3148C04	Mm.270088	AW547365	expressed sequence AW547365	3	0.5175	0.236007	4.38546	0.0109784	0.140283
H3109B06	Mm.21846	Ubl3	ubiquitin-like 3	3	0.363125	0.165613	4.38523	0.0109799	0.140194
H3063G12	Mm.35796	Evi5	ecotropic viral integration site 5	3	0.644025	0.293867	4.38311	0.0109941	0.140267
H3148A05	Mm.6522	Cmkor1	chemokine orphan receptor 1	3	1.56503	0.714202	4.38258	0.0109976	0.140203
H3016C12	Mm.42195	Ruvbl1	RuvB-like protein 1	3	0.5613	0.25626	4.3807	0.0110103	0.140255
H3066G10	Mm.252826	1110003E01Rik	RIKEN cDNA 1110003E01 gene	3	0.57495	0.262537	4.37996	0.0110152	0.14021
H3067F11	Mm.121122	2310057M21Rik	RIKEN cDNA 2310057M21 gene	3	0.697025	0.31833	4.37926	0.01102	0.140162
H3017G06	Mm.28922	Farsl	phenylalanine-tRNA synthetase-like	3	0.36255	0.165759	4.37443	0.0110525	0.140468
H3061E07	Mm.11780	Tm7sf1	transmembrane 7 superfamily member 1	3	1.22925	0.562127	4.37357	0.0110583	0.140433
H3093F06	Mm.25594	Prkar2b	protein kinase, cAMP dependent regulatory, type II beta	3	0.971575	0.444361	4.37291	0.0110628	0.140382
H3020F02	Mm.290474	1110055N21Rik	RIKEN cDNA 1110055N21 gene	3	0.516525	0.236307	4.37165	0.0110713	0.140381
H3006H10	Mm.3552	Clock	circadian locomoter output cycles kaput	3	0.563425	0.257845	4.37027	0.0110806	0.140392
H3027H10	Mm.29363	Nol5a	nucleolar protein 5A	3	0.565375	0.258789	4.3694	0.0110866	0.140359
H3026C07	Mm.270091	D11Ertd768e	DNA segment, Chr 11, ERATO Doi 768, expressed	3	0.7272	0.332897	4.36892	0.0110898	0.140291
H3065C04	Mm.218669	Tcea1	transcription elongation factor A (SII) 1	3	0.881075	0.403416	4.36807	0.0110956	0.140257
H3029B05	Mm.913	T	brachyury	3	0.289075	0.132367	4.36779	0.0110974	0.140173
H3032E10	Mm.275521	Wtap	Wilms' tumour 1-associating protein	3	0.735925	0.337014	4.36733	0.0111006	0.140106
H3017C06	Mm.293628	Ppp1r15b	protein phosphatase 1, regulatory (inhibitor) subunit 15b	3	0.7096	0.325511	4.35991	0.0111511	0.140635
H3021B03	Mm.26392	6330575P11Rik	RIKEN cDNA 6330575P11 gene	3	0.17715	0.081296	4.35813	0.0111632	0.140681
H3059H05	Mm.88349	3200001F09Rik	RIKEN cDNA 3200001F09 gene	3	0.3825	0.175628	4.3558	0.0111792	0.140774
H3014E03	Mm.28765	Tram1	translocating chain-associating membrane protein 1	3	0.506175	0.23248	4.35457	0.0111876	0.140773
H3012D05	Mm.233529	B230215M10Rik	RIKEN cDNA B230215M10 gene	3	0.30365	0.139553	4.35176	0.0112069	0.140908
H3127G07	Mm.321048	Map4k5	mitogen-activated protein kinase kinase kinase kinase 5	3	0.339475	0.156128	4.34866	0.0112282	0.141068
H3076E01	Mm.37562	Pold3	polymerase (DNA-directed), delta 3, accessory subunit	3	0.414775	0.190809	4.34755	0.0112359	0.141057
H3080D10	Mm.279070	Prsc2	protease, cysteine, 2 (NEDD8 specific)	3	0.46605	0.214451	4.34645	0.0112435	0.141044
P181	Mm.273292	Gli2	GLI-Kruppel family member GLI2	3	0.8064	0.371471	4.34165	0.0112767	0.141353
H3021H12	Mm.276407	E430025E21Rik	RIKEN cDNA E430025E21 gene	3	0.46215	0.212978	4.33988	0.011289	0.1414
N786	Mm.209292	Rbpsuh	recombining binding protein suppressor of hairless (Drosophila)	3	0.972175	0.448068	4.33941	0.0112922	0.141333
H3077E02	Mm.196081		Mus musculus transcribed sequences	3	0.333075	0.153513	4.33936	0.0112926	0.14123
H3062H10	Mm.11829	E330036L07Rik	RIKEN cDNA E330036L07 gene	3	0.418675	0.193017	4.33821	0.0113005	0.141223
H3026C04	Mm.20290	Lars	leucyl-tRNA synthetase	3	0.582725	0.268702	4.33733	0.0113067	0.141192
H3141E10	Mm.279781	2310047G20Rik	RIKEN cDNA 2310047G20 gene	3	0.404375	0.186614	4.33382	0.0113311	0.14139
H3077C09	Mm.315959	Nap1l1	nucleosome assembly protein 1-like 1	3	0.6832	0.315545	4.33028	0.0113558	0.141591
H3039E12	Mm.20543	Pum2	pumilio 2 (Drosophila)	3	0.431825	0.19954	4.3282	0.0113704	0.141665
H3077A01	Mm.252695	D2Ertd750e	DNA segment, Chr 2, ERATO Doi 750, expressed	3	0.133075	0.061505	4.3273	0.0113767	0.141637
H3030H10	Mm.340	Hmgb3	high mobility group box 3	3	0.422125	0.195304	4.32275	0.0114086	0.141927
H3158F06	Mm.265990	D16H22S680E	DNA segment, Chr 16, human D22S680E, expressed	3	0.628475	0.290799	4.3224	0.0114111	0.141851
H3071H12	Mm.267131	D19Wsu12e	DNA segment, Chr 19, Wayne State University 12, expressed	3	0.730175	0.33795	4.3212	0.0114196	0.141849
P311	Mm.292711	Cx3cl1	chemokine (C-X3-C motif) ligand 1	3	0.6819	0.315616	4.32107	0.0114205	0.141753
H3129H09	Mm.124316	Tfpi	tissue factor pathway inhibitor	3	0.571175	0.264374	4.32096	0.0114213	0.141656
H3030A10	Mm.281601	Ddx55	DEAD (Asp-Glu-Ala-Asp) box polypeptide 55	3	0.340075	0.157424	4.32051	0.0114244	0.141589
H3019A12	Mm.276389	Hmox1	heme oxygenase (decycling) 1	3	0.12475	0.05776	4.31956	0.0114311	0.141565
H3155A08	Mm.223550	Zc3hav1	zinc finger CCCH type, antiviral 1	3	0.43295	0.200579	4.31701	0.0114491	0.141682
T143	Mm.38241	Irak1	interleukin-1 receptor-associated kinase 1	3	0.238975	0.110715	4.31693	0.0114497	0.141582
H3159D01	Mm.287173	Wee1	wee 1 homolog (S. pombe)	3	0.4205	0.194832	4.31653	0.0114525	0.141511
H3130H11	Mm.272568	D5Ertd249e	DNA segment, Chr 5, ERATO Doi 249, expressed	3	0.39595	0.183517	4.31512	0.0114625	0.141528
H3052C04	Mm.22264	Apg5l	autophagy 5-like (S. cerevisiae)	3	0.595525	0.276307	4.3106	0.0114945	0.141818
H3065A08			EST	3	0.3724	0.173196	4.30033	0.0115677	0.142614
H3043G04	Mm.200413	Nsep1	nuclease sensitive element binding protein 1	3	0.129825	0.060467	4.29407	0.0116127	0.143062
H3146H08			EST	3	0.20245	0.09434	4.29191	0.0116283	0.143146
H3003E01	Mm.300798	Cutl1	cut-like 1 (Drosophila)	3	0.21885	0.102039	4.28952	0.0116455	0.143251
H3101F04	Mm.166372	Rnf130	ring finger protein 130	3	0.60875	0.283847	4.28928	0.0116472	0.143165
H3013C01	Mm.291745	D1Wsu40e	DNA segment, Chr 1, Wayne State University 40, expressed	3	0.86745	0.404578	4.28817	0.0116552	0.143157
H3085C10	Mm.27962	Zfp238	zinc finger protein 238	3	0.518275	0.241779	4.28717	0.0116625	0.143139
H3087F05	Mm.8142	2310007F12Rik	RIKEN cDNA 2310007F12 gene	3	0.6623	0.309018	4.28648	0.0116675	0.143094
P895	Mm.248042	Stx7	syntaxin 7	3	0.589075	0.274863	4.28632	0.0116687	0.143002
H3029G06	Mm.130148	4631416I11Rik	RIKEN cDNA 4631416I11 gene	3	0.361875	0.169039	4.28155	0.0117032	0.143319
H3068H11	Mm.302240		Mus musculus transcribed sequence with weak similarity to protein ref:NP_083693.1 (M.musculus) RIKEN cDNA 9030605E16 [Mus musculus]	3	0.4232	0.197803	4.27901	0.0117217	0.143439
H3084F06	Mm.234578		Mus musculus similar to RIKEN cDNA E330009P21 gene (LOC382106), mRNA	3	0.34195	0.160048	4.2731	0.0117649	0.14386
P466	Mm.129481	Nr3c1	nuclear receptor subfamily 3, group C, member 1	3	0.483325	0.226418	4.26931	0.0117926	0.144093
H3098B09	Mm.275340	mSSH-1L	slingshot-like 1	3	0.2259	0.105857	4.26802	0.0118022	0.144102
H3001H10	Mm.3532	Tmsb10	thymosin, beta 10	3	0.335	0.157113	4.26445	0.0118284	0.144316
H3117F02	Mm.40678	Pde1a	phosphodiesterase 1A, calmodulin-dependent	3	0.807575	0.378936	4.26233	0.0118441	0.144399
H3015D06	Mm.73397	Plxnb1	plexin B1	3	0.482725	0.226529	4.26193	0.0118471	0.144329
H3074F04	Mm.23942	Abcc3	ATP-binding cassette, sub-family C (CFTR/MRP), member 3	3	0.9522	0.447389	4.2567	0.0118857	0.144693
H3015D09			EST	3	0.31995	0.150653	4.2475	0.0119542	0.145419
H3086H01	Mm.288114	1200016B17Rik	RIKEN cDNA 1200016B17 gene	3	0.460725	0.217168	4.24303	0.0119877	0.145719
T028	Mm.38951	Sucla2	succinate-Coenzyme A ligase, ADP-forming, beta subunit	3	0.33935	0.159966	4.24278	0.0119896	0.145635
H3013E10	Mm.277870	Snx3	sorting nexin 3	3	0.27895	0.131557	4.24073	0.0120049	0.145713
H3012D04	Mm.122366	4833420I20Rik	RIKEN cDNA 4833420I20 gene	3	0.707475	0.333711	4.24004	0.0120101	0.145669
H3062H07	Mm.227912	Itpr1	inositol 1,4,5-triphosphate receptor 1	3	0.297	0.14022	4.2362	0.0120391	0.145913
H3127G10	Mm.41903	1200014J11Rik	RIKEN cDNA 1200014J11 gene	3	0.2669	0.126067	4.23426	0.0120536	0.145982
P701	Mm.4325	Klf4	Kruppel-like factor 4 (gut)	3	0.64715	0.305868	4.23156	0.0120741	0.146122
H3121F02	Mm.269083	5730409G07Rik	RIKEN cDNA 5730409G07 gene	3	0.357275	0.168989	4.22839	0.0120981	0.146306
H3128A05	Mm.260271	Surf5	surfeit gene 5	3	0.294325	0.139238	4.22766	0.0121037	0.146265
H3111G07	Mm.18796	3830408D24Rik	RIKEN cDNA 3830408D24 gene	3	0.33365	0.158019	4.22292	0.0121397	0.146593
H3019B03	Mm.28099	Soat1	sterol O-acyltransferase 1	3	0.775925	0.367626	4.22127	0.0121523	0.146637
H3081A05	Mm.28790	Cpsf3	cleavage and polyadenylation specificity factor 3	3	0.395925	0.187617	4.22056	0.0121577	0.146596
H3009D11	Mm.35492	2600013N14Rik	RIKEN cDNA 2600013N14 gene	3	0.3816	0.181112	4.21397	0.0122081	0.147096
H3127B07	Mm.164439		Mus musculus transcribed sequences	3	0.205975	0.097889	4.20834	0.0122515	0.14751
P149	Mm.298220	Nes	nestin	3	0.9902	0.470931	4.20528	0.0122751	0.147687
H3019D07	Mm.233889	2900042E17Rik	RIKEN cDNA 2900042E17 gene	3	0.369125	0.175582	4.20459	0.0122805	0.147643
H3006D06	Mm.81161	Sema6d	sema domain, transmembrane domain (TM), and cytoplasmic domain, (semaphorin) 6D	3	0.214175	0.101893	4.20392	0.0122856	0.147598
H3020C07	Mm.4746	Hand1	heart and neural crest derivatives expressed transcript 1	3	0.613475	0.292014	4.20168	0.012303	0.147699
H3114C11	Mm.241152	2400004H09Rik	RIKEN cDNA 2400004H09 gene	3	0.56695	0.26994	4.20057	0.0123116	0.147695
H3006A05	Mm.2870	Rpa2	replication protein A2	3	0.814475	0.388079	4.19747	0.0123357	0.147876
H3126A12	Mm.195753	Pole4	polymerase (DNA-directed), epsilon 4 (p12 subunit)	3	0.484075	0.230665	4.19721	0.0123377	0.147793
H3119E02	Mm.258010	4931406N15Rik	RIKEN cDNA 4931406N15 gene	3	0.6538	0.311583	4.19664	0.0123422	0.147738
P179	Mm.200912	Prkab1	protein kinase, AMP-activated, beta 1 non-catalytic subunit	3	0.6919	0.330014	4.19316	0.0123693	0.147956
H3087G04	Mm.28534	Lrrc1	leucine rich repeat containing 1	3	0.43435	0.20722	4.19216	0.0123771	0.147942
H3056H02	Mm.132709	4931406P16Rik	RIKEN cDNA 4931406P16 gene	3	0.320275	0.153206	4.18097	0.0124649	0.148883
H3016F02	Mm.288005	AI429152	expressed sequence AI429152	3	0.485825	0.232878	4.17236	0.0125331	0.149589
H3072H04	Mm.22314		Mus musculus transcribed sequence with weak similarity to protein prf:2119399A (H.sapiens) 2119399A elongin B [Homo sapiens]	3	0.611525	0.29326	4.17053	0.0125476	0.149654
H3015D08	Mm.281916	AI114950	expressed sequence AI114950	3	0.411575	0.197399	4.16998	0.012552	0.149598
H3065B08	Mm.268926	Rnf141	ring finger protein 141	3	0.67625	0.324461	4.16845	0.0125642	0.149634
H3137H04	Mm.46656	Mrps35	mitochondrial ribosomal protein S35	3	0.4276	0.205342	4.16476	0.0125936	0.149877
H3140F08	Mm.272568	D5Ertd249e	DNA segment, Chr 5, ERATO Doi 249, expressed	3	0.5384	0.258645	4.16323	0.0126059	0.149914
H3037B02	Mm.275281	Narg1	NMDA receptor-regulated gene 1	3	0.5134	0.246655	4.1629	0.0126085	0.149838
H3022C11	Mm.281642	Maea	macrophage erythroblast attacher	3	0.6518	0.313274	4.16121	0.012622	0.14989
P514	Mm.676	Atf1	activating transcription factor 1	3	0.583	0.28031	4.15968	0.0126343	0.149928
H3028A08	Mm.159684	Tmpo	thymopoietin	3	0.32065	0.154241	4.15777	0.0126497	0.150002
H3022H03	Mm.25559	Stk17b	serine/threonine kinase 17b (apoptosis-inducing)	3	0.7035	0.338603	4.15531	0.0126695	0.150129
H3016H09	Mm.273405	2610029G23Rik	RIKEN cDNA 2610029G23 gene	3	0.853675	0.411016	4.15397	0.0126802	0.150148
H3103C03	Mm.33919	C330023M02Rik	RIKEN cDNA C330023M02 gene	3	0.447475	0.215478	4.15333	0.0126854	0.150101
H3072C10	Mm.95244	E330024M09	hypothetical protein E330024M09	3	0.2498	0.120329	4.15196	0.0126965	0.150125
H3067H10			EST	3	0.21305	0.102646	4.15115	0.012703	0.150094
H3011A06	Mm.250567	2010317E03Rik	RIKEN cDNA 2010317E03 gene	3	0.950525	0.45796	4.15113	0.0127032	0.149989
H3095E11	Mm.29606	0610009C03Rik	RIKEN cDNA 0610009C03 gene	3	0.425125	0.204853	4.15054	0.012708	0.149938
H3021B12	Mm.11480	2810470K21Rik	RIKEN cDNA 2810470K21 gene	3	0.567875	0.273648	4.1504	0.0127091	0.149843
H3049A11	Mm.234262	Rab20	RAB20, member RAS oncogene family	3	0.455175	0.219373	4.14978	0.0127141	0.149795
H3047B02	Mm.172842		Mus musculus transcribed sequence with weak similarity to protein pir:T12486 (H.sapiens) T12486 hypothetical protein DKFZp566H033.1 - human	3	0.246975	0.119074	4.14828	0.0127263	0.149832
H3034B05	Mm.174695	D4Ertd22e	DNA segment, Chr 4, ERATO Doi 22, expressed	3	0.524025	0.252865	4.14469	0.0127553	0.150067
H3157G03	Mm.17715	Og2x	OG2 homeobox gene	3	0.11735	0.056664	4.14196	0.0127776	0.150221
H3095D08	Mm.5126	Fadd	Fas (TNFRSF6)-associated via death domain	3	0.63525	0.306766	4.14159	0.0127806	0.150149
H3024H08	Mm.4653	TgN737Rpw	transgene insert site 737, insertional mutation, polycystic kidney disease	3	0.53775	0.25971	4.14115	0.0127841	0.150084
H3015E06	Mm.239514	Traf1	Tnf receptor-associated factor 1	3	0.629675	0.304107	4.14115	0.0127842	0.149978
H3108B02	Mm.173920		Mus musculus transcribed sequences	3	0.29265	0.141443	4.13805	0.0128094	0.150167
H3115E07	Mm.120835	4931439A04Rik	RIKEN cDNA 4931439A04 gene	3	0.4571	0.220931	4.13794	0.0128103	0.15007
H3032D03	Mm.221403	Pdgfra	platelet derived growth factor receptor, alpha polypeptide	3	1.0279	0.497004	4.13638	0.0128231	0.150113
H3018E01	Mm.277413		Mus musculus expressed sequence C77604, mRNA (cDNA clone IMAGE:3594956), containing frame-shift errors	3	0.3338	0.161413	4.13596	0.0128265	0.150046
H3099F01	Mm.243722	Fzd3	frizzled homolog 3 (Drosophila)	3	0.490875	0.237501	4.13367	0.0128453	0.15016
H3110B06	Mm.210899	4631427C17Rik	RIKEN cDNA 4631427C17 gene	3	0.66675	0.32274	4.1318	0.0128606	0.150232
H3124G10	Mm.201248	Uxs1	UDP-glucuronate decarboxylase 1	3	0.213525	0.103447	4.12819	0.0128904	0.150473
H3068G06	Mm.321354		Mus musculus transcribed sequences	3	0.3201	0.155138	4.12664	0.0129031	0.150514
H3104A12	Mm.12665	Cul3	cullin 3	3	0.269625	0.130765	4.12381	0.0129265	0.150681
H3042F03	Mm.219946	Smyd5	SET and MYND domain containing 5	3	0.51965	0.25232	4.11898	0.0129665	0.15104
H3089G06	Mm.173289		Mus musculus transcribed sequences	3	0.24665	0.119882	4.11487	0.0130006	0.151331
H3069G05	Mm.124502	Rasa2	RAS p21 protein activator 2	3	0.5203	0.252915	4.11442	0.0130043	0.151267
H3139F04	Mm.323100		Mus musculus transcribed sequences	3	0.591475	0.287825	4.10996	0.0130416	0.151593
H3151A04	Mm.225096	Itga6	integrin alpha 6	3	0.819825	0.399092	4.10845	0.0130543	0.151634
T096	Mm.3095	Nr1h4	nuclear receptor subfamily 1, group H, member 4	3	1.41987	0.691255	4.10811	0.0130571	0.15156
H3136B07	Mm.6343	Npm1	nucleophosmin 1	3	0.2512	0.122404	4.10444	0.0130879	0.15181
H3025D08	Mm.86453	Aebp2	AE binding protein 2	3	0.37715	0.183895	4.10179	0.0131101	0.151961
H3015F04	Mm.20615	Ap3s2	adaptor-related protein complex 3, sigma 2 subunit	3	0.6494	0.316655	4.10163	0.0131115	0.15187
H3021E12			EST	3	0.4625	0.225613	4.09994	0.0131257	0.151928
H3107B01	Mm.304834		Mus musculus transcribed sequences	3	0.2964	0.144683	4.09723	0.0131486	0.152086
H3112E12	Mm.30059	Marcks	myristoylated alanine rich protein kinase C substrate	3	0.476475	0.23273	4.09466	0.0131703	0.152231
H3023C10	Mm.296150	Purb	purine rich element binding protein B	3	0.527175	0.257534	4.09402	0.0131758	0.152187
H3035H11	Mm.1444	Cops7a	COP9 (constitutive photomorphogenic) homolog, subunit 7a (Arabidopsis thaliana)	3	0.3346	0.163471	4.09369	0.0131785	0.152112
H3002C08	Mm.215524		Mus musculus, clone IMAGE:3472070, mRNA	3	0.317875	0.155648	4.08453	0.0132565	0.152904
H3015G04	Mm.24592	2610019P18Rik	RIKEN cDNA 2610019P18 gene	3	0.31725	0.155344	4.08448	0.0132569	0.152802
H3015G07	Mm.273170	Scamp4	secretory carrier membrane protein 4	3	0.451575	0.221169	4.08354	0.0132649	0.152788
H3102B10	Mm.24425	1300019C06Rik	RIKEN cDNA 1300019C06 gene	3	0.224	0.109796	4.0803	0.0132927	0.153
H3024C02	Mm.293565	2210022N24Rik	RIKEN cDNA 2210022N24 gene	3	0.087525	0.042914	4.07905	0.0133034	0.153017
H3017A11	Mm.310713		Mus musculus ES cells cDNA, RIKEN full-length enriched library, clone:2410074K14 product:expressed sequence AW146353, full insert sequence	3	0.200825	0.098506	4.0774	0.0133175	0.153072
H3020E10			EST	3	0.162	0.079469	4.07705	0.0133205	0.153
H3001E05	Mm.228	Homer2	homer homolog 2 (Drosophila)	3	0.621125	0.30508	4.07188	0.013365	0.153404
H3085D10	Mm.45054	Gda	guanine deaminase	3	1.46982	0.722206	4.07038	0.013378	0.153446
H3047C08	Mm.172846		Mus musculus transcribed sequences	3	0.349525	0.171827	4.06834	0.0133956	0.153542
T459	Mm.4618	D030041N15Rik	RIKEN cDNA D030041N15 gene	3	0.6905	0.339872	4.06329	0.0134394	0.153936
H3055B08	Mm.129701	9030416H16Rik	RIKEN cDNA 9030416H16 gene	3	0.73405	0.361568	4.06037	0.0134648	0.15412
H3087C12	Mm.26468	4632434I11Rik	RIKEN cDNA 4632434I11 gene	3	0.8155	0.402177	4.05543	0.0135079	0.154506
H3007B08	Mm.953	Smpd2	sphingomyelin phosphodiesterase 2, neutral	3	0.31405	0.15493	4.0541	0.0135196	0.154532
H3011A01	Mm.277621	0610041P13Rik	RIKEN cDNA 0610041P13 gene	3	0.383125	0.189055	4.05306	0.0135287	0.154529
H3145A06	Mm.1396	Slc30a3	solute carrier family 30 (zinc transporter), member 3	3	0.42315	0.209027	4.04875	0.0135665	0.154854
H3014B10	Mm.154378	Ncl	nucleolin	3	0.46975	0.23219	4.04625	0.0135885	0.154998
H3016E12	Mm.284906	Rars	arginyl-tRNA synthetase	3	0.633275	0.313073	4.04554	0.0135948	0.154962
H3096F06	Mm.221274	AI503894	expressed sequence AI503894	3	0.62015	0.307069	4.03916	0.0136513	0.155498
H3091H11	Mm.173321		Mus musculus transcribed sequences	3	0.567275	0.28093	4.03855	0.0136566	0.155452
H3119A09	Mm.260904	Rps8	ribosomal protein S8	3	0.070425	0.034882	4.03789	0.0136625	0.155411
H3040H09	Mm.125346		Mus musculus 7 days neonate cerebellum cDNA, RIKEN full-length enriched library, clone:A730084E02 product:unknown EST, full insert sequence	3	0.2528	0.125442	4.03055	0.0137279	0.156047
H3138G11	Mm.236519	Niban	niban protein	3	1.0143	0.503425	4.0296	0.0137364	0.156035
H3005B10	Mm.25269	Bms1l	BMS1-like, ribosome assembly protein (yeast)	3	0.37765	0.187461	4.02911	0.0137407	0.155977
H3136H07	Mm.302945		Mus musculus transcribed sequence with moderate similarity to protein sp:Q13415 (H.sapiens) ORC1_HUMAN ORIGIN RECOGNITION COMPLEX SUBUNIT 1 (REPLICATION CONTROL PROTEIN 1)	3	0.5151	0.2557	4.02894	0.0137422	0.155887
P519	Mm.254978	Bmp6	bone morphogenetic protein 6	3	1.1636	0.57767	4.0286	0.0137453	0.155815
H3003F10	Mm.444	Idb1	inhibitor of DNA binding 1	3	1.31668	0.653736	4.02816	0.0137493	0.155752
H3115D09	Mm.5360		Mus musculus 16 days neonate cerebellum cDNA, RIKEN full-length enriched library, clone:9630025B04 product:unclassifiable, full insert sequence	3	0.597575	0.296725	4.0278	0.0137525	0.155682
H3126F08	Mm.226554	Tfb1m	transcription factor B1, mitochondrial	3	0.624375	0.31007	4.02731	0.0137568	0.155624
H3070C05	Mm.84121	2610028A01Rik	RIKEN cDNA 2610028A01 gene	3	0.449175	0.223124	4.02623	0.0137665	0.155627
H3001C03	Mm.296385		Mus musculus similar to DEAH (Asp-Glu-Ala-His) box polypeptide 37; DEAD/DEAH box helicase DDX37; DEAD/H (Asp-Glu-Ala-Asp/His) box polypeptide 37 (LOC208144), mRNA	3	0.244875	0.121653	4.02578	0.0137705	0.155565
H3109E08	Mm.24738		Mus musculus 10 days neonate cerebellum cDNA, RIKEN full-length enriched library, clone:B930086G17 product:unknown EST, full insert sequence	3	0.18955	0.094216	4.02374	0.0137889	0.155666
H3005H07	Mm.271819	1810031K02Rik	RIKEN cDNA 1810031K02 gene	3	0.595075	0.295928	4.02175	0.0138067	0.15576
H3133C12	Mm.129682	E430012M05Rik	RIKEN cDNA E430012M05 gene	3	0.414525	0.206241	4.01982	0.0138241	0.15585
H3117C08	Mm.254588	Cltc	clathrin, heavy polypeptide (Hc)	3	0.106075	0.052777	4.01974	0.0138248	0.155752
H3123F09	Mm.21105	AA407526	expressed sequence AA407526	3	0.464825	0.231444	4.01673	0.013852	0.155951
H3078H01	Mm.221900	2410007P03Rik	RIKEN cDNA 2410007P03 gene	3	0.29215	0.145552	4.01437	0.0138733	0.156084
H3115F04	Mm.172947	Tfip11	tuftelin interacting protein 11	3	0.21185	0.105621	4.01151	0.0138993	0.156269
H3084B01	Mm.250006		Mus musculus transcribed sequences	3	0.3701	0.184578	4.01022	0.013911	0.156294
H3003D09	Mm.289248	2610301I15Rik	RIKEN cDNA 2610301I15 gene	3	0.209925	0.104717	4.0094	0.0139185	0.156272
H3096B01			EST	3	0.587325	0.293036	4.00855	0.0139262	0.156252
H3101F09	Mm.289929	2610203K23Rik	RIKEN cDNA 2610203K23 gene	3	0.30255	0.151004	4.00718	0.0139387	0.156286
H3133H03	Mm.308627		Mus musculus transcribed sequences	3	0.146325	0.073066	4.0053	0.0139558	0.156371
T247	Mm.26587	Nr1d2	nuclear receptor subfamily 1, group D, member 2	3	0.30705	0.153446	4.00205	0.0139854	0.156597
H3067A10	Mm.250072		Mus musculus transcribed sequences	3	0.401725	0.200761	4.00202	0.0139857	0.156494
H3011G01	Mm.275332	Apg7l	autophagy 7-like (S. cerevisiae)	3	0.521275	0.260734	3.99851	0.0140178	0.156747
H3022B10	Mm.218637	Cd2ap	CD2-associated protein	3	0.423	0.211689	3.99644	0.0140369	0.156854
H3008C02	Mm.267692	Txnl2	thioredoxin-like 2	3	0.216925	0.108635	3.99364	0.0140627	0.157035
H3106D02	Mm.23684	Axin	axin	3	0.47865	0.239957	3.98947	0.0141012	0.157358
H3039B06	Mm.179331	2810457M08Rik	RIKEN cDNA 2810457M08 gene	3	0.6635	0.332775	3.98767	0.0141178	0.157437
H3070B05	Mm.35796	Evi5	ecotropic viral integration site 5	3	0.702325	0.352366	3.98634	0.0141301	0.157468
H3038F06	Mm.154712		Mus musculus transcribed sequences	3	0.180375	0.090512	3.98565	0.0141365	0.157433
H3101B05	Mm.28035		Mus musculus ES cells cDNA, RIKEN full-length enriched library, clone:C330022M23 product:unclassifiable, full insert sequence	3	0.7187	0.360733	3.98467	0.0141457	0.157428
H3015D05	Mm.330896		Mus musculus transcribed sequence with moderate similarity to protein sp:P55084 (H.sapiens) ECHB_HUMAN Trifunctional enzyme beta subunit, mitochondrial precursor (TP-beta) [Includes: 3-ketoacyl-CoA thiolase (Acetyl-CoA acyltransferase) (Beta-ketothiolase)]	3	0.501	0.251485	3.98434	0.0141487	0.157355
H3050G08	Mm.290022	2310046H11Rik	RIKEN cDNA 2310046H11 gene	3	0.36235	0.181902	3.98401	0.0141518	0.157283
H3082G07	Mm.25863	Obox6	oocyte specific homeobox 6	3	0.2144	0.107654	3.98312	0.0141601	0.157269
H3092A05			EST	3	0.5942	0.2984	3.98258	0.0141651	0.157219
H3070A09	Mm.757	Arha	ras homolog gene family, member A	3	0.61805	0.310447	3.98168	0.0141734	0.157205
H3015B10	Mm.3317	Gus	beta-glucuronidase	3	0.6973	0.350647	3.97722	0.014215	0.15756
H3019F01	Mm.289086	2610104C07Rik	RIKEN cDNA 2610104C07 gene	3	0.674025	0.339039	3.97609	0.0142256	0.157572
H3078G02	Mm.283734	Nek7	NIMA (never in mitosis gene a)-related expressed kinase 7	3	0.651975	0.327985	3.97564	0.0142298	0.157513
H3096E08	Mm.30506	AI316885	expressed sequence AI316885	3	0.9809	0.49346	3.9756	0.0142301	0.157411
H3086A07	Mm.245395	Pten	phosphatase and tensin homolog	3	0.55205	0.277722	3.97555	0.0142306	0.15731
H3012F10	Mm.21974	Csk	c-src tyrosine kinase	3	0.39245	0.197514	3.9739	0.014246	0.157375
H3093H06	Mm.26076		Mus musculus transcribed sequences	3	0.636325	0.320508	3.97073	0.0142758	0.157598
H3079H07	Mm.236868	Rps3	ribosomal protein S3	3	0.673725	0.339802	3.9654	0.014326	0.158046
H3073B09			EST	3	0.2859	0.144199	3.96534	0.0143265	0.157946
H3058A08	Mm.23904	Takrp	T-cell activation kelch repeat protein	3	0.446975	0.225536	3.96367	0.0143422	0.158014
H3007D03	Mm.236438	Efs	embryonal Fyn-associated substrate	3	0.628025	0.316971	3.96267	0.0143517	0.158013
H3105D07	Mm.304355		Mus musculus transcribed sequence with moderate similarity to protein pdb:1LBG (E. coli) B Chain B, Lactose Operon Repressor Bound To 21-Base Pair Symmetric Operator Dna, Alpha Carbons Only	3	0.22745	0.1148	3.96255	0.0143529	0.15792
H3113F01	Mm.278726	Mak3p	Mak3p homolog (S. cerevisiae)	3	0.559925	0.282704	3.96122	0.0143655	0.157953
H3050B11	Mm.142132	Timm9	translocase of inner mitochondrial membrane 9 homolog (yeast)	3	0.26215	0.132368	3.96092	0.0143683	0.157879
H3027A06	Mm.185453	Eif4g2	eukaryotic translation initiation factor 4, gamma 2	3	0.337075	0.170231	3.9602	0.0143752	0.157849
H3026B11	Mm.87854	Atp7b	ATPase, Cu++ transporting, beta polypeptide	3	0.136975	0.069207	3.95844	0.0143918	0.157927
P541	Mm.6200	Col7a1	procollagen, type VII, alpha 1	3	0.584775	0.295557	3.9571	0.0144045	0.15796
H3112F05	Mm.297335		Mus musculus adult male aorta and vein cDNA, RIKEN full-length enriched library, clone:A530059D09 product:TUBULIN, BETA 5 homolog [Homo sapiens], full insert sequence	3	0.417625	0.21111	3.95647	0.0144105	0.157921
H3017D12	Mm.29586		Mus musculus 10 days neonate medulla oblongata cDNA, RIKEN full-length enriched library, clone:B830039F09 product:BRAIN ACID SOLUBLE PROTEIN 1 (BASP1 PROTEIN) (NEURONAL AXONAL MEMBRANE PROTEIN NAP-22) homolog [Rattus norvegicus], full insert sequence	3	0.909	0.459527	3.95624	0.0144127	0.15784
H3004E12	Mm.275574	Dtx2	deltex 2 homolog (Drosophila)	3	0.33725	0.170519	3.95557	0.0144191	0.157805
H3006D01	Mm.28371	Tex261	testis expressed gene 261	3	0.471725	0.238535	3.95519	0.0144227	0.15774
H3134F04	Mm.249986	2410016F01Rik	RIKEN cDNA 2410016F01 gene	3	0.5584	0.282403	3.95463	0.014428	0.157694
H3001B10	Mm.17917	D4Wsu27e	DNA segment, Chr 4, Wayne State University 27, expressed	3	0.298675	0.15129	3.94838	0.0144877	0.158241
H3094H08	Mm.41670	2410004J23Rik	RIKEN cDNA 2410004J23 gene	3	0.433025	0.21985	3.93927	0.0145752	0.159091
H3013A05	Mm.42767	Rps17	ribosomal protein S17	3	0.14925	0.075782	3.93892	0.0145786	0.159023
H3002C05			EST	3	0.539975	0.274249	3.93784	0.014589	0.159031
H3140A02	Mm.248093	Slc9a1	solute carrier family 9 (sodium/hydrogen exchanger), member 1	3	0.5128	0.260554	3.93622	0.0146047	0.159096
H3081C04	Mm.27120	LOC228071	hypothetical protein LOC228071	3	0.44465	0.226188	3.93168	0.0146487	0.159471
H3102D10	Mm.252206	E330017N17	hypothetical protein E330017N17	3	0.40785	0.208172	3.9184	0.0147784	0.160776
H3077C06	Mm.247951	4931430I01Rik	RIKEN cDNA 4931430I01 gene	3	0.348875	0.178124	3.91722	0.01479	0.160796
H3107B10	Mm.276429	0610033L19Rik	RIKEN cDNA 0610033L19 gene	3	0.295075	0.150931	3.91006	0.0148606	0.161457
H3043D11	Mm.52271		Mus musculus 4 days neonate male adipose cDNA, RIKEN full-length enriched library, clone:B430203I24 product:unknown EST, full insert sequence	3	0.54245	0.277656	3.90735	0.0148874	0.161642
T114	Mm.270109	Nr2f2	nuclear receptor subfamily 2, group F, member 2	3	0.57835	0.296705	3.89848	0.0149757	0.162493
H3146E01	Mm.2870	Rpa2	replication protein A2	3	0.61465	0.315376	3.89789	0.0149815	0.16245
H3021C07	Mm.274841	LOC277097	hypothetical protein LOC277097	3	0.98525	0.505689	3.89666	0.0149938	0.162476
H3034A06	Mm.29432	1110018O08Rik	RIKEN cDNA 1110018O08 gene	3	0.4006	0.205632	3.89629	0.0149976	0.16241
H3155C10	Mm.268456	Ugt1a1	UDP-glucuronosyltransferase 1 family, member 1	3	1.18637	0.60899	3.89621	0.0149984	0.162312
H3086C05	Mm.258977	F830018F18Rik	RIKEN cDNA F830018F18 gene	3	0.335425	0.172216	3.89539	0.0150066	0.162294
H3099E08	Mm.22363	Rarsl	arginyl-tRNA synthetase-like	3	0.362425	0.186115	3.89464	0.0150141	0.162269
H3045B11	Mm.172798		Mus musculus transcribed sequences	3	0.374475	0.192334	3.894	0.0150204	0.162231
H3093B11	Mm.99793	1110007C24Rik	RIKEN cDNA 1110007C24 gene	3	0.31995	0.164451	3.89112	0.0150494	0.162437
H3126D09	Mm.193688	Ptp4a2	protein tyrosine phosphatase 4a2	3	0.29565	0.152127	3.88689	0.015092	0.16279
H3082E08	Mm.253771	C330016H24Rik	RIKEN cDNA C330016H24 gene	3	0.1804	0.092853	3.8857	0.015104	0.162813
H3013F04	Mm.181721	2610041P16Rik	RIKEN cDNA 2610041P16 gene	3	0.563875	0.290337	3.88427	0.0151184	0.162862
H3157A10	Mm.135689	Trim27	tripartite motif protein 27	3	0.623625	0.321111	3.88417	0.0151195	0.162767
P211	Mm.268356	E2f3	E2F transcription factor 3	3	0.313725	0.161549	3.88397	0.0151215	0.162682
P148	Mm.4861	Tnfsf5	tumor necrosis factor (ligand) superfamily, member 5	3	0.2149	0.110687	3.88303	0.015131	0.162679
H3038E06	Mm.292405	Zfp216	zinc finger protein 216	3	0.481375	0.247941	3.88298	0.0151315	0.162577
H3039D06	Mm.155568		Mus musculus transcribed sequences	3	0.27655	0.142442	3.88298	0.0151315	0.162472
H3008F08	Mm.262037	Eif1a	eukaryotic translation initiation factor 1A	3	0.726525	0.374393	3.88108	0.0151508	0.162572
H3019A08	Mm.30010	Arpc1b	actin related protein 2/3 complex, subunit 1B	3	0.49575	0.255553	3.87982	0.0151635	0.162603
H3004C08			EST	3	0.4676	0.241063	3.87948	0.015167	0.162534
H3140E11	Mm.10516	AI987712	expressed sequence AI987712	3	0.58795	0.303132	3.87917	0.0151702	0.162463
H3148H05	Mm.37533	Homer1	homer homolog 1 (Drosophila)	3	0.251625	0.129811	3.8768	0.0151942	0.162615
H3033H11	Mm.172589		Mus musculus transcribed sequences	3	0.110425	0.056982	3.87576	0.0152048	0.162622
H3051D06	Mm.27104	2700078H01Rik	RIKEN cDNA 2700078H01 gene	3	0.321875	0.166129	3.875	0.0152126	0.1626
H3006H01	Mm.186936	1110032A13Rik	RIKEN cDNA 1110032A13 gene	3	0.4302	0.22228	3.8708	0.0152555	0.162952
H3119F08	Mm.2103	Ccng1	cyclin G1	3	0.1973	0.102014	3.86811	0.015283	0.163141
H3142F08	Mm.215814	4933429I20Rik	RIKEN cDNA 4933429I20 gene	3	0.335775	0.173621	3.8679	0.0152851	0.163058
H3068G07	Mm.34775	Pdha1	pyruvate dehydrogenase E1 alpha 1	3	0.3	0.155241	3.86495	0.0153154	0.163275
H3010F11	Mm.33192	Liph	lipase, member H	3	0.364375	0.18864	3.86319	0.0153336	0.163363
H3112F07	Mm.292258	AW060714	expressed sequence AW060714	3	0.350175	0.181553	3.85755	0.0153918	0.163877
H3082G10	Mm.25548	Kpna3	karyopherin (importin) alpha 3	3	0.255925	0.132773	3.85508	0.0154173	0.164043
H3025D03	Mm.10374	2610002J02Rik	RIKEN cDNA 2610002J02 gene	3	0.2179	0.113137	3.85197	0.0154497	0.164281
H3086D12	Mm.23829	Kpnb2	karyopherin (importin) beta 2	3	0.701625	0.36455	3.84926	0.0154778	0.164474
H3023A04	Mm.11780	Tm7sf1	transmembrane 7 superfamily member 1	3	1.42495	0.740429	3.84898	0.0154807	0.164399
H3142C06	Mm.30713		Mus musculus adult male cerebellum cDNA, RIKEN full-length enriched library, clone:1500012M23 product:unknown EST, full insert sequence	3	0.22905	0.119171	3.84407	0.0155321	0.164839
H3011E07	Mm.1297	Trap1a	tumor rejection antigen P1A	3	0.239825	0.124822	3.84267	0.0155468	0.164888
H3107F12			EST	3	0.203925	0.10624	3.83896	0.0155857	0.165194
H3101B06	Mm.41417	Glmn	glomulin, FKBP associated protein	3	0.490775	0.255895	3.83575	0.0156195	0.165446
H3003E07			EST	3	0.81415	0.424748	3.83356	0.0156425	0.165584
P048	Mm.46421	2300002A13Rik	RIKEN cDNA 2300002A13 gene	3	0.9593	0.500519	3.83322	0.0156462	0.165516
H3026E06			EST	3	0.244725	0.127836	3.82873	0.0156937	0.165912
H3007C02	Mm.260288	Ppp2ca	protein phosphatase 2a, catalytic subunit, alpha isoform	3	0.341225	0.178344	3.8266	0.0157163	0.166045
P380	Mm.217116	Mmp15	matrix metalloproteinase 15	3	0.29205	0.15278	3.82313	0.0157532	0.166328
H3119C01	Mm.29407	Vhlh	von Hippel-Lindau syndrome homolog	3	0.628325	0.329186	3.81744	0.015814	0.166863
H3117B03	Mm.292297	Zfp110	zinc finger protein 110	3	0.234225	0.122782	3.81529	0.0158371	0.166999
H3042A11	Mm.280656	Usp1	ubiquitin specific protease 1	3	0.689525	0.361568	3.81408	0.0158501	0.16703
H3007B12	Mm.275413	5730495N10Rik	RIKEN cDNA 5730495N10 gene	3	0.277525	0.145794	3.80709	0.0159254	0.167716
H3073E07	Mm.295315	Nol4	nucleolar protein 4	3	0.325875	0.171417	3.80213	0.0159791	0.168174
P112	Mm.235338	H2-Aa	histocompatibility 2, class II antigen A, alpha	3	0.3385	0.178063	3.80202	0.0159803	0.168079
H3018C11	Mm.239997	D9Wsu10e	DNA segment, Chr 9, Wayne State University 10, expressed	3	0.541575	0.285059	3.79974	0.0160051	0.168232
H3092E08	Mm.306963		Mus musculus transcribed sequence with weak similarity to protein ref:NP_081764.1 (M.musculus) RIKEN cDNA 5730493B19 [Mus musculus]	3	0.26035	0.137036	3.79972	0.0160053	0.168127
H3144G09	Mm.28063	5730466P16Rik	RIKEN cDNA 5730466P16 gene	3	0.27835	0.146515	3.79961	0.0160066	0.168033
H3136F06	Mm.290338	Prkx	putative serine/threonine kinase	3	0.178175	0.093852	3.79694	0.0160356	0.168231
H3104G10	Mm.44142	E030025C11Rik	RIKEN cDNA E030025C11 gene	3	0.537525	0.283172	3.79645	0.016041	0.16818
T045	Mm.19039	Got1	glutamate oxaloacetate transaminase 1, soluble	3	0.1563	0.082458	3.79104	0.0161001	0.168693
H3022B05	Mm.29105	Gtf3a	general transcription factor III A	3	0.555775	0.293316	3.78959	0.016116	0.168752
H3023F10	Mm.296383	Hspca	heat shock protein 1, alpha	3	0.4201	0.221738	3.78916	0.0161208	0.168695
H3135B01	Mm.251188	Egfl5	EGF-like-domain, multiple 5	3	0.3159	0.16696	3.78413	0.0161761	0.169166
H3010H12	Mm.271715	Phf5a	PHD finger protein 5A	3	0.68215	0.360678	3.7826	0.016193	0.169235
H3074H07	Mm.252918	1600012F09Rik	RIKEN cDNA 1600012F09 gene	3	0.614425	0.32498	3.78131	0.0162072	0.169276
H3062E08			EST	3	1.06933	0.565863	3.77945	0.0162278	0.169384
H3127H06	Mm.292452		Mus musculus similar to Aldo-keto reductase family 1 member C13 (LOC238465), mRNA	3	0.4372	0.231492	3.77724	0.0162524	0.169533
H3018F06	Mm.165079	Crry	complement receptor related protein	3	0.48005	0.25425	3.7762	0.0162639	0.169546
H3126C02	Mm.291802	Rpl18	ribosomal protein L18	3	0.36495	0.193394	3.77415	0.0162866	0.169675
P193	Mm.80565	Ppp3ca	protein phosphatase 3, catalytic subunit, alpha isoform	3	0.41805	0.22166	3.77199	0.0163107	0.169819
P357	Mm.4717	Lamc2	laminin, gamma 2	3	0.5459	0.289798	3.76744	0.0163614	0.17024
H3043D04	Mm.162556		Mus musculus transcribed sequences	3	0.364475	0.193553	3.76615	0.0163759	0.170283
H3030A02	Mm.716	Cpsf2	cleavage and polyadenylation specific factor 2	3	0.2234	0.118733	3.76308	0.0164104	0.170534
H3098F11	Mm.173884		Mus musculus transcribed sequences	3	0.534575	0.284177	3.76227	0.0164195	0.17052
H3078F02	Mm.34102	Odc	ornithine decarboxylase, structural	3	0.75565	0.401907	3.76033	0.0164414	0.17064
H3103D01	Mm.280784	Ppp1cc	protein phosphatase 1, catalytic subunit, gamma isoform	3	0.41445	0.220444	3.76014	0.0164435	0.170555
H3148D12	Mm.250419	Ccni	cyclin I	3	0.522725	0.278074	3.75961	0.0164494	0.170509
H3081H12	Mm.247077	Ormdl2	ORM1-like 2 (S. cerevisiae)	3	0.4685	0.249332	3.75804	0.0164672	0.170585
H3027C11	Mm.28916	5830446M03Rik	RIKEN cDNA 5830446M03 gene	3	0.372325	0.198225	3.75659	0.0164835	0.170647
H3070A12	Mm.30204	Qdpr	quininoid dihydropteridine reductase	3	0.3801	0.202517	3.75375	0.0165156	0.170872
H3099H08			EST	3	0.40175	0.214111	3.75273	0.0165272	0.170884
H3087D10	Mm.173249		Mus musculus transcribed sequences	3	0.232225	0.123907	3.74838	0.0165765	0.171287
H3074D02	Mm.194486	Phf3	PHD finger protein 3	3	0.499575	0.266605	3.74768	0.0165846	0.171263
H3022A08	Mm.30056	Serhl	serine hydrolase-like	3	0.299575	0.159873	3.74765	0.0165848	0.171158
H3044F06	Mm.234179	0710007A14Rik	RIKEN cDNA 0710007A14 gene	3	0.528075	0.281852	3.74717	0.0165903	0.171108
H3050E12			EST	3	0.053	0.028289	3.747	0.0165923	0.171022
H3103E06	Mm.296928		Mus musculus transcribed sequences	3	0.391675	0.209073	3.74677	0.0165949	0.17094
H3118A09	Mm.3094	1200011O22Rik	RIKEN cDNA 1200011O22 gene	3	0.553125	0.295559	3.7429	0.016639	0.171288
H3156G04			EST	3	0.32165	0.171881	3.74271	0.0166413	0.171205
H3005A01	Mm.240619	Ccdc2	coiled-coil domain containing 2	3	0.6202	0.331437	3.74249	0.0166438	0.171124
H3121E01	Mm.27348	Rala	v-ral simian leukemia viral oncogene homolog A (ras related)	3	1.10953	0.593116	3.74134	0.0166569	0.171152
H3114H09	Mm.294625	Nap1l4	nucleosome assembly protein 1-like 4	3	0.5376	0.287847	3.73532	0.016726	0.171755
H3026F08	Mm.289900	Cct7	chaperonin subunit 7 (eta)	3	0.3265	0.174891	3.73374	0.0167442	0.171834
H3001H05	Mm.215667	Hspe1	heat shock protein 1 (chaperonin 10)	3	0.3822	0.20474	3.73352	0.0167468	0.171754
P627	Mm.101591	Daf1	decay accelerating factor 1	3	0.471325	0.252486	3.73347	0.0167473	0.171652
H3059F05	Mm.6838	Crygb	crystallin, gamma B	3	0.245975	0.131864	3.73073	0.016779	0.17187
H3083H10	Mm.329529		Mus musculus transcribed sequence with weak similarity to protein ref:NP_081764.1 (M.musculus) RIKEN cDNA 5730493B19 [Mus musculus]	3	0.18945	0.101626	3.72839	0.016806	0.17204
H3103H03	Mm.102752	C1galt1	core 1 UDP-galactose:N-acetylgalactosamine-alpha-R beta 1,3-galactosyltransferase	3	0.371675	0.199382	3.72828	0.0168073	0.171946
P065	Mm.6922		Mus musculus similar to Jun dimerization protein 1 gene (LOC381319), mRNA	3	0.574775	0.308344	3.72814	0.016809	0.171857
P579	Mm.270109	Nr2f2	nuclear receptor subfamily 2, group F, member 2	3	0.493225	0.264847	3.72461	0.0168499	0.172168
H3153C05	Mm.33207	D15Ertd366e	DNA segment, Chr 15, ERATO Doi 366, expressed	3	0.43925	0.235874	3.72445	0.0168518	0.17208
H3152E04			EST	3	0.44	0.236508	3.72081	0.0168942	0.172406
H3159D07	Mm.4592	Cish	cytokine inducible SH2-containing protein	3	0.285625	0.153735	3.71581	0.0169526	0.172895
H3021D05	Mm.291707	Cul2	cullin 2	3	0.377625	0.203392	3.71327	0.0169823	0.173091
H3016D07	Mm.328319		Mus musculus transcribed sequences	3	0.85705	0.461676	3.71278	0.0169881	0.173043
H3016G04	Mm.239997	D9Wsu10e	DNA segment, Chr 9, Wayne State University 10, expressed	3	0.535275	0.288977	3.70463	0.0170842	0.173914
H3007D05	Mm.5434	LOC228812	cell division cycle 91-like 1	3	0.509975	0.275442	3.70296	0.0171039	0.174008
H3078D11	Mm.292239		Mus musculus similar to shrm protein (LOC384204), mRNA	3	0.690625	0.373014	3.70294	0.0171041	0.173902
H3046D11	Mm.210019	Elavl1	ELAV (embryonic lethal, abnormal vision, Drosophila)-like 1 (Hu antigen R)	3	0.491575	0.265619	3.70135	0.0171229	0.173986
H3049E10	Mm.6461	Hrb	HIV-1 Rev binding protein	3	0.351025	0.189677	3.7013	0.0171236	0.173886
H3070E03	Mm.12051	St7	suppression of tumorigenicity 7	3	1.49673	0.809224	3.69916	0.017149	0.174036
H3074F07	Mm.295330	Usp7	ubiquitin specific protease 7	3	0.1131	0.06119	3.69666	0.0171787	0.174231
H3029D09	Mm.297033	Mrps11	mitochondrial ribosomal protein S11	3	0.3641	0.197049	3.69553	0.0171922	0.17426
H3018H04	Mm.38233	Ptk9	protein tyrosine kinase 9	3	0.764325	0.413666	3.69537	0.0171941	0.174172
H3013C05	Mm.306766		Mus musculus transcribed sequences	3	0.484775	0.262375	3.69528	0.0171952	0.174076
H3124E03	Mm.116770	LOC192976	hypothetical protein LOC192976	3	0.41075	0.222312	3.69525	0.0171955	0.173972
P136	Mm.15621	Cftr	cystic fibrosis transmembrane conductance regulator homolog	3	0.84365	0.456637	3.69506	0.0171978	0.173889
H3053C07	Mm.194486	Phf3	PHD finger protein 3	3	0.5457	0.295408	3.69456	0.0172038	0.173843
H3003E09	Mm.292021	4921532K09Rik	RIKEN cDNA 4921532K09 gene	3	0.62195	0.336715	3.69422	0.0172078	0.173777
H3092C07	Mm.290772	Rpl7	ribosomal protein L7	3	0.344025	0.186423	3.69081	0.0172486	0.174082
H3104E02	Mm.31607	AI447711	expressed sequence AI447711	3	0.1888	0.102331	3.68997	0.0172586	0.174076
H3138G08	Mm.293635	1700020E22Rik	RIKEN cDNA 1700020E22 gene	3	0.456425	0.247504	3.68822	0.0172796	0.174182
H3043D01			EST	3	0.240675	0.130512	3.68815	0.0172804	0.174083
H3050E05	Mm.9563	1500031M22Rik	RIKEN cDNA 1500031M22 gene	3	0.432025	0.234287	3.688	0.0172823	0.173995
H3122G03	Mm.279843	2010003J03Rik	RIKEN cDNA 2010003J03 gene	3	0.439375	0.238315	3.68734	0.0172902	0.173969
H3050D04	Mm.254169	D19Ertd386e	DNA segment, Chr 19, ERATO Doi 386, expressed	3	0.338375	0.183582	3.68636	0.017302	0.173981
H3106F03	Mm.270632	Psmd5	proteasome (prosome, macropain) 26S subunit, non-ATPase, 5	3	0.248175	0.134672	3.68561	0.017311	0.173965
H3109G07	Mm.167636		Mus musculus 0 day neonate cerebellum cDNA, RIKEN full-length enriched library, clone:C230011H18 product:unknown EST, full insert sequence	3	0.426375	0.231641	3.68134	0.0173624	0.174376
T209	Mm.1514	Lpl	lipoprotein lipase	3	1.12205	0.609999	3.67886	0.0173924	0.174571
H3038B12	Mm.117552		Mus musculus transcribed sequence with moderate similarity to protein pir:S12207 (M.musculus) S12207 hypothetical protein (B2 element) - mouse	3	0.263575	0.143365	3.67697	0.0174153	0.174694
H3013B03	Mm.195689	Hbs1l	Hbs1-like (S. cerevisiae)	3	0.39425	0.21463	3.67377	0.0174542	0.174977
H3004D02	Mm.22724	Plaa	phospholipase A2, activating protein	3	0.4697	0.255984	3.66976	0.017503	0.17536
H3062C10	Mm.30670	Spnr	spermatid perinuclear RNA binding protein	3	0.654775	0.357167	3.66649	0.0175429	0.175653
H3022C01	Mm.209300	Pcyt1a	phosphate cytidylyltransferase 1, choline, alpha isoform	3	0.387475	0.211436	3.66517	0.017559	0.175708
H3031E05	Mm.291928	Catnb	catenin beta	3	0.379725	0.207213	3.66507	0.0175603	0.175614
H3085F01	Mm.35764	1110003E08Rik	RIKEN cDNA 1110003E08 gene	3	0.4615	0.252091	3.66138	0.0176056	0.175959
H3124E06	Mm.641	Atf4	activating transcription factor 4	3	0.354425	0.19362	3.66103	0.0176099	0.175896
H3027H05	Mm.259078	Rpo1-2	RNA polymerase 1-2	3	0.5469	0.299032	3.6578	0.0176497	0.176187
H3153C02	Mm.260647		Mus musculus adult male spinal cord cDNA, RIKEN full-length enriched library, clone:A330049K02 product:SIMILAR TO CONSERVED MEMBRANE PROTEIN AT 44E homolog [Mus musculus], full insert sequence	3	0.7352	0.40233	3.65471	0.0176878	0.17646
H3053H10	Mm.193274	2610028F08Rik	RIKEN cDNA 2610028F08 gene	3	0.980125	0.536446	3.65415	0.0176948	0.176423
H3016E03	Mm.21767	Cdh5	cadherin 5	3	0.12435	0.06808	3.65303	0.0177086	0.176454
H3100A10	Mm.93636	E130119P06Rik	RIKEN cDNA E130119P06 gene	3	0.140725	0.077056	3.65252	0.0177149	0.17641
H3154G08	Mm.182851		Mus musculus transcribed sequences	3	0.650125	0.356075	3.65162	0.0177261	0.176415
H3152C04	Mm.152941	Usp16	ubiquitin specific protease 16	3	0.253425	0.138809	3.65141	0.0177287	0.176334
H3148A08			EST	3	0.369075	0.202156	3.65139	0.0177289	0.17623
H3009E11	Mm.3468	Socs3	suppressor of cytokine signaling 3	3	0.42305	0.231794	3.65022	0.0177434	0.176268
H3016E09	Mm.196330	0610013D04Rik	RIKEN cDNA 0610013D04 gene	3	0.1446	0.079352	3.64451	0.0178145	0.176867
H3024C05	Mm.236513	Pcbp2	poly(rC) binding protein 2	3	0.2093	0.11488	3.64381	0.0178232	0.176847
H3004C03	Mm.171798		Mus musculus transcribed sequences	3	0.335525	0.18417	3.64364	0.0178253	0.176761
H3005G07	Mm.5697		Mus musculus 0 day neonate lung cDNA, RIKEN full-length enriched library, clone:E030006G18 product:unknown EST, full insert sequence	3	0.47255	0.259906	3.63632	0.0179171	0.177565
H3049E06	Mm.219793	Ssrp1	structure specific recognition protein 1	3	0.33785	0.185916	3.63443	0.0179408	0.177693
H3055G09	Mm.233031	C130099A20Rik	RIKEN cDNA C130099A20 gene	3	0.899325	0.495219	3.63203	0.0179711	0.177886
H3103B03	Mm.257181	Nasp	nuclear autoantigenic sperm protein (histone-binding)	3	0.64565	0.355867	3.6286	0.0180144	0.178208
H3065D08	Mm.26875	Morc	microrchidia	3	0.408175	0.225318	3.62309	0.0180843	0.178791
H3012G12	Mm.229108	Pik3cd	phosphatidylinositol 3-kinase catalytic delta polypeptide	3	0.373	0.205974	3.62181	0.0181006	0.178845
H3024E03	Mm.181387	2610005A10Rik	RIKEN cDNA 2610005A10 gene	3	0.528475	0.291871	3.62129	0.0181072	0.178803
H3078H06	Mm.291755	1190005P17Rik	RIKEN cDNA 1190005P17 gene	3	0.2982	0.1647	3.62113	0.0181093	0.178717
H3042E08	Mm.38241	Irak1	interleukin-1 receptor-associated kinase 1	3	0.24195	0.133711	3.61901	0.0181364	0.178877
H3117A06	Mm.3544	Cacnb3	calcium channel, voltage-dependent, beta 3 subunit	3	0.262575	0.145169	3.61752	0.0181554	0.178957
H3023G04	Mm.32019	Tcp1	t-complex protein 1	3	0.328325	0.181741	3.6131	0.018212	0.179408
H3011C02	Mm.271798	Htf9c	HpaII tiny fragments locus 9c	3	0.643425	0.356544	3.60923	0.0182617	0.17979
H3024H09	Mm.291247	Arl1	ADP-ribosylation factor-like 1	3	0.20395	0.113053	3.60803	0.0182772	0.179835
H3125A07	Mm.22708	Serpinh1	serine (or cysteine) proteinase inhibitor, clade H, member 1	3	0.652475	0.361882	3.60601	0.0183032	0.179984
T341	Mm.235547	Pdk4	pyruvate dehydrogenase kinase, isoenzyme 4	3	0.915175	0.507659	3.60547	0.0183103	0.179945
H3090A08			EST	3	0.887875	0.492623	3.60468	0.0183204	0.179938
H3130B09	Mm.212691	B230208L21Rik	RIKEN cDNA B230208L21 gene	3	0.157925	0.087647	3.60364	0.0183339	0.179963
H3012A07	Mm.285724	Hspa8	heat shock protein 8	3	0.5029	0.27919	3.60256	0.0183479	0.179993
H3076C04	Mm.31512	Rnf2	ring finger protein 2	3	0.778825	0.432407	3.60228	0.0183516	0.179922
H3083H03	Mm.11480	2810470K21Rik	RIKEN cDNA 2810470K21 gene	3	0.492325	0.273427	3.60114	0.0183662	0.179959
H3001B02	Mm.158801	Rod1	ROD1 regulator of differentiation 1 (S. pombe)	3	0.2046	0.113651	3.6005	0.0183747	0.179934
H3007F07	Mm.23880	Mrpl46	mitochondrial ribosomal protein L46	3	0.2983	0.165735	3.59973	0.0183847	0.179925
H3025E07	Mm.136376	Adprh	ADP-ribosylarginine hydrolase	3	0.444825	0.247314	3.59726	0.0184168	0.180132
H3100H01	Mm.3716		Mus musculus transcribed sequence with strong similarity to protein ref:NP_006328.1 (H.sapiens) microspherule protein 1; cell cycle-regulated factor (78 kDa) [Homo sapiens]	3	0.597425	0.332385	3.59478	0.018449	0.180341
P314	Mm.19155	Sfrp2	secreted frizzled-related sequence protein 2	3	0.6552	0.364835	3.59176	0.0184885	0.180619
T452	Mm.298220	Nes	nestin	3	0.44805	0.249497	3.59163	0.0184902	0.180529
H3075F03	Mm.301250		Mus musculus transcribed sequence with weak similarity to protein sp:P09871 (H.sapiens) C1S_HUMAN Complement C1s component precursor (C1 esterase)	3	1.66683	0.928664	3.58973	0.0185151	0.180665
H3070D09	Mm.9002	Ube3a	ubiquitin protein ligase E3A	3	0.28725	0.160321	3.58343	0.018598	0.181366
H3116D06	Mm.270088	AW547365	expressed sequence AW547365	3	1.4637	0.817094	3.5827	0.0186076	0.181352
H3022H06	Mm.249695	Ppm1b	protein phosphatase 1B, magnesium dependent, beta isoform	3	0.459525	0.256559	3.58222	0.0186139	0.181306
H3116B06	Mm.203898	Snn	stannin	3	0.5918	0.330935	3.57654	0.018689	0.181931
H3104A11	Mm.19169	Txnl	thioredoxin-like	3	0.43835	0.245142	3.57629	0.0186923	0.181855
H3034H04			EST	3	0.358275	0.200393	3.57573	0.0186998	0.181821
H3091E09	Mm.297348		Mus musculus similar to Eukaryotic translation initiation factor 1A (eIF-1A) (eIF-4C) (LOC236359), mRNA	3	0.400325	0.223928	3.57548	0.0187031	0.181746
H3010G10	Mm.289341	0610009E20Rik	RIKEN cDNA 0610009E20 gene	3	0.50655	0.283432	3.5744	0.0187174	0.181777
H3096B08			EST	3	0.24255	0.135724	3.57417	0.0187205	0.1817
H3064B08	Mm.173547		Mus musculus transcribed sequences	3	0.4538	0.253942	3.57404	0.0187222	0.18161
H3040D02	Mm.140619	Egln1	EGL nine homolog 1 (C. elegans)	3	0.4905	0.274606	3.57239	0.0187441	0.181715
H3035B01	Mm.276018	Ifld2	induced in fatty liver dystrophy 2	3	1.5051	0.843176	3.57007	0.018775	0.181908
H3009E05	Mm.105331	Psip2	PC4 and SFRS1 interacting protein 2	3	0.5943	0.333122	3.56806	0.0188019	0.182061
H3037A04			EST	3	0.06115	0.03429	3.56664	0.018821	0.182139
H3130E09	Mm.272568	D5Ertd249e	DNA segment, Chr 5, ERATO Doi 249, expressed	3	0.6337	0.35543	3.56582	0.018832	0.182138
H3133B12	Mm.317829		Mus musculus transcribed sequences	3	0.81515	0.457391	3.56435	0.0188516	0.182221
H3058E03	Mm.25494		Mus musculus transcribed sequence with weak similarity to protein ref:NP_081764.1 (M.musculus) RIKEN cDNA 5730493B19 [Mus musculus]	3	0.30925	0.173671	3.56134	0.0188921	0.182505
H3150A06			EST	3	0.28165	0.15823	3.56	0.01891	0.182572
H3112A09	Mm.289868	Rpl9	ribosomal protein L9	3	0.470825	0.264623	3.55846	0.0189308	0.182665
H3016D11	Mm.142253	Panx1	pannexin 1	3	0.678975	0.382021	3.55465	0.0189823	0.183054
H3084F01			EST	3	0.3899	0.219581	3.55131	0.0190275	0.183384
P082	Mm.27557	Cdk9	cyclin-dependent kinase 9 (CDC2-related kinase)	3	0.26735	0.150639	3.54955	0.0190515	0.183507
H3038B11	Mm.43212	D7Ertd743e	DNA segment, Chr 7, ERATO Doi 743, expressed	3	0.408725	0.23031	3.54935	0.0190542	0.183426
H3081H10	Mm.103949	Snrp1c	U1 small nuclear ribonucleoprotein 1C	3	0.2962	0.166927	3.54886	0.0190609	0.183383
H3016A01	Mm.3879	Hif1a	hypoxia inducible factor 1, alpha subunit	3	0.25255	0.142575	3.54269	0.019145	0.184085
H3058A11			EST	3	0.33215	0.187537	3.54224	0.0191511	0.184036
H3097B11	Mm.149238		Mus musculus 16 days embryo head cDNA, RIKEN full-length enriched library, clone:C130002M15 product:unknown EST, full insert sequence	3	0.23145	0.13068	3.54224	0.0191512	0.183929
H3054F05	Mm.45436	Lyzs	lysozyme	3	0.512625	0.28948	3.5417	0.0191586	0.183894
H3105B02	Mm.174048		Mus musculus transcribed sequences	3	0.53785	0.303896	3.53969	0.0191861	0.18405
H3141A05	Mm.267395	5730408C10Rik	RIKEN cDNA 5730408C10 gene	3	0.3097	0.175016	3.53911	0.0191941	0.18402
H3021D06	Mm.21623	Dhrs1	dehydrogenase/reductase (SDR family) member 1	3	0.566825	0.320352	3.53877	0.0191988	0.183957
H3055G02	Mm.180056	Ctsc	cathepsin C	3	1.1899	0.673166	3.53523	0.0192474	0.184316
H3017B05	Mm.30208	2610028H14Rik	RIKEN cDNA 2610028H14 gene	3	0.3688	0.208848	3.53176	0.0192953	0.184667
H3008A01	Mm.28237	Stx12	syntaxin 12	3	0.4811	0.272498	3.53104	0.0193052	0.184655
H3007H12	Mm.296457	Ktn1	kinectin 1	3	0.30655	0.173659	3.53049	0.0193129	0.184621
H3006F08	Mm.188851	Pdap1	PDGFA associated protein 1	3	0.598075	0.339113	3.5273	0.0193571	0.184937
H3103A09	Mm.2310	ORF6	open reading frame 6	3	0.317975	0.180579	3.52172	0.0194347	0.18557
H3078A07	Mm.11567		Mus musculus 0 day neonate lung cDNA, RIKEN full-length enriched library, clone:E030046B03 product:unclassifiable, full insert sequence	3	0.308325	0.175189	3.51991	0.0194599	0.185703
H3126B06	Mm.295770		Mus musculus transcribed sequences	3	0.214075	0.121712	3.51774	0.0194902	0.185885
H3138G12	Mm.276405	Fkbp5	FK506 binding protein 5	3	0.276	0.156988	3.51619	0.0195119	0.185984
H3109F07	Mm.227583	Atp2a2	ATPase, Ca++ transporting, cardiac muscle, slow twitch 2	3	0.394975	0.224732	3.51507	0.0195276	0.186026
H3083A07	Mm.236587	D5Ertd606e	DNA segment, Chr 5, ERATO Doi 606, expressed	3	0.59885	0.340775	3.51464	0.0195337	0.185977
H3052B01	Mm.172986		Mus musculus transcribed sequences	3	0.393975	0.224207	3.51438	0.0195373	0.185904
H3104C07	Mm.27856	Ptprk	protein tyrosine phosphatase, receptor type, K	3	0.31605	0.179871	3.51418	0.0195401	0.185823
H3006C01	Mm.257181	Nasp	nuclear autoantigenic sperm protein (histone-binding)	3	0.822125	0.468231	3.51162	0.0195761	0.186058
H3066D07	Mm.277217	Dgkd	diacylglycerol kinase, delta	3	0.326425	0.185975	3.51042	0.019593	0.186111
H3071H01	Mm.258250	2810425F24Rik	RIKEN cDNA 2810425F24 gene	3	0.35605	0.202887	3.50983	0.0196013	0.186083
H3015F01	Mm.27764	Rnf128	ring finger protein 128	3	0.5337	0.304155	3.5094	0.0196074	0.186033
H3076B03	Mm.247837	AW559096	expressed sequence AW559096	3	0.1373	0.078363	3.50421	0.0196807	0.186621
H3024E07	Mm.21911	Smfn	small fragment nuclease	3	0.26255	0.149934	3.5022	0.0197093	0.186784
H3029G01	Mm.31539	BC030335	cDNA sequence BC030335	3	0.197025	0.112541	3.50138	0.0197209	0.186787
H3054A10	Mm.28847	2410005L11Rik	RIKEN cDNA 2410005L11 gene	3	0.47905	0.273679	3.50082	0.0197288	0.186755
H3141H06	Mm.252148	Phgdhl1	phosphoglycerate dehydrogenase like 1	3	0.4045	0.231169	3.49961	0.0197461	0.186811
P463	Mm.210745	Glul	glutamate-ammonia ligase (glutamine synthase)	3	0.147675	0.084442	3.49767	0.0197737	0.186965
T136	Mm.288383	Tcf1	transcription factor 1	3	0.342375	0.195901	3.49538	0.0198063	0.187166
H3122H04			EST	3	0.186175	0.106653	3.49122	0.0198659	0.187621
H3006C07			EST	3	0.286475	0.164323	3.48674	0.0199303	0.188122
H3066H01	Mm.219685	Pigf	phosphatidylinositol glycan, class F	3	0.728575	0.418094	3.48522	0.0199522	0.18822
H3105E02	Mm.35764	1110003E08Rik	RIKEN cDNA 1110003E08 gene	3	0.48765	0.280287	3.47965	0.0200328	0.188872
H3060E06	Mm.9820		Mus musculus transcribed sequences	3	0.27385	0.157408	3.4795	0.0200349	0.188784
H3064B06	Mm.16753	Chek1	checkpoint kinase 1 homolog (S. pombe)	3	0.483575	0.278038	3.47848	0.0200497	0.188816
H3073E05	Mm.12051	St7	suppression of tumorigenicity 7	3	1.59472	0.917196	3.47739	0.0200655	0.188856
H3022C02	Mm.235813	AI256711	expressed sequence AI256711	3	0.242775	0.139656	3.47677	0.0200745	0.188834
H3124C11	Mm.259103	Phc2	polyhomeotic-like 2 (Drosophila)	3	0.1896	0.109206	3.47234	0.020139	0.189332
P109	Mm.273024	Tlr1	toll-like receptor 1	3	0.411775	0.237242	3.47135	0.0201535	0.18936
H3101G10	Mm.258010	4931406N15Rik	RIKEN cDNA 4931406N15 gene	3	0.429725	0.247649	3.47044	0.0201668	0.189377
H3110F02	Mm.289900	Cct7	chaperonin subunit 7 (eta)	3	0.462775	0.266792	3.46918	0.0201852	0.189442
H3011F07	Mm.193688	Ptp4a2	protein tyrosine phosphatase 4a2	3	0.282	0.162768	3.46505	0.0202458	0.189902
H3008H12	Mm.24591	Wdr3	WD repeat domain 3	3	0.7997	0.461615	3.46479	0.0202495	0.189829
H3158H05	Mm.12309	D1Ertd622e	DNA segment, Chr 1, ERATO Doi 622, expressed	3	0.294475	0.169997	3.46447	0.0202543	0.189766
H3075C04	Mm.212546	Ches1	checkpoint suppressor 1	3	0.585875	0.33825	3.46415	0.0202589	0.189701
H3127A08	Mm.61901	Mtbp	Mdm2, transformed 3T3 cell double minute p53 binding protein	3	0.435325	0.251508	3.46172	0.0202946	0.189928
H3004C12	Mm.28738	C330027I04Rik	RIKEN cDNA C330027I04 gene	3	0.429475	0.248494	3.45663	0.0203699	0.190524
H3029G02	Mm.293286		Mus musculus similar to expressed sequence AW538212 (LOC381703), mRNA	3	0.878675	0.508652	3.45492	0.0203953	0.190653
H3019D08	Mm.264435	Ero1l	ERO1-like (S. cerevisiae)	3	0.304275	0.176251	3.45274	0.0204275	0.190846
H3159G02	Mm.292510	Rac1	RAS-related C3 botulinum substrate 1	3	0.469375	0.272178	3.44903	0.0204827	0.191253
H3082D08	Mm.103522	Pwp2h	PWP2 (periodic tryptophan protein) homolog, yeast	3	0.840525	0.487562	3.44787	0.0205001	0.191307
H3094B04	Mm.138332	3110006P09Rik	RIKEN cDNA 3110006P09 gene	3	0.431725	0.250463	3.44741	0.020507	0.191263
P793	Mm.2258	Scgb1a1	secretoglobin, family 1A, member 1 (uteroglobin)	3	0.25995	0.150831	3.44691	0.0205145	0.191225
H3013D04	Mm.11186	BC042513	cDNA sequence BC042513	3	0.173	0.100389	3.4466	0.020519	0.191159
H3085A03	Mm.173216		Mus musculus transcribed sequences	3	0.306675	0.178033	3.44515	0.0205408	0.191253
P586	Mm.233518	Bcl2	B-cell leukemia/lymphoma 2	3	0.375625	0.218247	3.4422	0.020585	0.191557
H3048G11	Mm.24021	Blvrb	biliverdin reductase B (flavin reductase (NADPH))	3	0.381675	0.221964	3.43907	0.020632	0.191885
H3014D03	Mm.271922	Brms1	breast cancer metastasis-suppressor 1	3	0.318825	0.185416	3.43903	0.0206326	0.191783
H3076A01	Mm.121973	5031439G07Rik	RIKEN cDNA 5031439G07 gene	3	0.6004	0.34919	3.43881	0.0206358	0.191705
H3095D02	Mm.292293		Mus musculus transcribed sequence with strong similarity to protein ref:NP_076122.1 (M.musculus) RIKEN cDNA 2410016O06 [Mus musculus]	3	0.16635	0.096755	3.43857	0.0206395	0.191631
H3091E02	Mm.41722	Nt5c	5',3'-nucleotidase, cytosolic	3	0.337075	0.196199	3.43604	0.0206776	0.191876
H3016E06	Mm.2152	2600017A12Rik	RIKEN cDNA 2600017A12 gene	3	0.459	0.267315	3.43415	0.0207062	0.192033
H3093C11	Mm.263032	C030014K08Rik	RIKEN cDNA C030014K08 gene	3	0.130375	0.076026	3.42977	0.0207726	0.192541
H3022D11	Mm.48686	Ppp4r1	protein phosphatase 4, regulatory subunit 1	3	0.394975	0.230435	3.42808	0.0207983	0.19267
P343	Mm.209940	Ttf1	transcription termination factor 1	3	0.07245	0.042301	3.42543	0.0208385	0.192935
H3076H01	Mm.240490	1200009K13Rik	RIKEN cDNA 1200009K13 gene	3	0.087625	0.051191	3.42347	0.0208684	0.193103
H3074D09	Mm.270922	Drg2	developmentally regulated GTP binding protein 2	3	0.4576	0.267422	3.42231	0.0208861	0.193159
H3124A02	Mm.3063	Ptn	pleiotrophin	3	0.88795	0.519218	3.42034	0.0209163	0.193329
H3105F11	Mm.27239	Vil	villin	3	0.3657	0.213849	3.42016	0.020919	0.193245
H3030B10	Mm.202775	2610007A16Rik	RIKEN cDNA 2610007A16 gene	3	0.47505	0.278205	3.41511	0.0209965	0.193853
H3043B05			EST	3	1.81793	1.06516	3.41342	0.0210225	0.193984
H3007F12	Mm.30929	Prdx1	peroxiredoxin 1	3	0.832575	0.488073	3.41168	0.0210494	0.194124
H3091D07	Mm.216325	E330008O22Rik	RIKEN cDNA E330008O22 gene	3	0.6223	0.365003	3.40983	0.0210779	0.194278
H3097A02	Mm.286830	Lap3	leucine aminopeptidase 3	3	0.450175	0.264182	3.40807	0.0211052	0.194421
H3149B05	Mm.38917	Taf12	TAF12 RNA polymerase II, TATA box binding protein (TBP)-associated factor	3	0.543825	0.319193	3.4075	0.021114	0.194393
H3092D02	Mm.20294	Sephs2	selenophosphate synthetase 2	3	0.542875	0.318639	3.40746	0.0211147	0.194291
H3054H12	Mm.196325	A730098D12Rik	RIKEN cDNA A730098D12 gene	3	0.2697	0.158355	3.40626	0.0211332	0.194353
H3105H03	Mm.126534	Paip2	polyadenylate-binding protein-interacting protein 2	3	0.27255	0.160148	3.40373	0.0211725	0.194605
H3096H07	Mm.262096	Pggtb1	protein geranylgeranyltransferase type I, beta subunit	3	0.268025	0.157821	3.39656	0.0212844	0.195524
T147	Mm.8534	Egfr	epidermal growth factor receptor	3	0.3644	0.214607	3.39597	0.0212936	0.1955
H3019F03	Mm.23173	2610100K07Rik	RIKEN cDNA 2610100K07 gene	3	0.396775	0.233683	3.39584	0.0212956	0.19541
H3012A09	Mm.209281	Eif4e	eukaryotic translation initiation factor 4E	3	0.3379	0.199042	3.39527	0.0213047	0.195384
H3110A03			EST	3	0.3484	0.205288	3.39425	0.0213206	0.195421
H3022A01	Mm.158211	1600025P05Rik	RIKEN cDNA 1600025P05 gene	3	0.596675	0.352195	3.38832	0.021414	0.196168
H3013G06	Mm.24506	E130012A19Rik	RIKEN cDNA E130012A19 gene	3	0.3032	0.179022	3.3873	0.02143	0.196205
H3009G10	Mm.87720	Arfrp1	ADP-ribosylation factor related protein 1	3	0.5143	0.303788	3.38591	0.021452	0.196297
H3125F05	Mm.30052	Mrpl50	mitochondrial ribosomal protein L50	3	0.179925	0.106306	3.38505	0.0214656	0.196313
H3085A06	Mm.186103		Mus musculus similar to Transcription initiation factor IIE, alpha subunit (TFIIE-alpha) (General transcription factor IIE 56 kDa subunit) (LOC241635), mRNA	3	0.34695	0.205303	3.37988	0.0215476	0.196954
T316	Mm.298220	Nes	nestin	3	0.7938	0.469755	3.37963	0.0215515	0.19688
H3073H02	Mm.258142	A930017E24Rik	RIKEN cDNA A930017E24 gene	3	0.1958	0.115922	3.37814	0.0215753	0.196988
H3023D05	Mm.290632	C87436	expressed sequence C87436	3	0.4075	0.241389	3.37629	0.0216048	0.197148
H3038E11	Mm.34934		Mus musculus transcribed sequences	3	0.199875	0.118404	3.37616	0.0216068	0.197057
H3063G05	Mm.173537		Mus musculus transcribed sequences	3	0.3734	0.221198	3.37616	0.0216068	0.196949
H3047B10	Mm.4505	Gart	phosphoribosylglycinamide formyltransferase	3	0.52625	0.311815	3.3754	0.021619	0.19695
H3135B02	Mm.19355	Rpl35a	ribosomal protein L35a	3	0.13495	0.079964	3.37527	0.021621	0.19686
T449	Mm.253424	Il1rap	interleukin 1 receptor accessory protein	3	1.09308	0.647846	3.37449	0.0216335	0.196865
H3044G12			EST	3	0.42185	0.250096	3.3735	0.0216493	0.1969
H3008H03			EST	3	0.401875	0.238374	3.3718	0.0216766	0.197039
H3015B01	Mm.4325	Klf4	Kruppel-like factor 4 (gut)	3	0.884675	0.524896	3.37086	0.0216917	0.197067
H3045C08	Mm.172867		Mus musculus transcribed sequences	3	0.3474	0.206203	3.36949	0.0217136	0.197158
H3101E11	Mm.259270	2410006F12Rik	RIKEN cDNA 2410006F12 gene	3	0.445425	0.264391	3.36944	0.0217144	0.197057
H3057A05	Mm.70546	2810429O05Rik	RIKEN cDNA 2810429O05 gene	3	0.43025	0.25545	3.36856	0.0217286	0.197077
H3100G07	Mm.280544	Ddx52	DEAD (Asp-Glu-Ala-Asp) box polypeptide 52	3	0.34345	0.203956	3.36789	0.0217393	0.197066
H3017C03	Mm.215034	Matr3	matrin 3	3	0.830925	0.493669	3.36632	0.0217645	0.197185
H3131C04	Mm.34012	5730469D23Rik	RIKEN cDNA 5730469D23 gene	3	0.327525	0.194756	3.36344	0.0218111	0.197499
H3103H10			EST	3	0.4008	0.238722	3.35788	0.021901	0.198204
H3130F03	Mm.19187	Ptma	prothymosin alpha	3	0.3252	0.193698	3.3578	0.0219024	0.198108
H3069G09	Mm.5697		Mus musculus 0 day neonate lung cDNA, RIKEN full-length enriched library, clone:E030006G18 product:unknown EST, full insert sequence	3	0.6819	0.406482	3.35513	0.0219457	0.198391
H3088G06	Mm.34199	3300001M20Rik	RIKEN cDNA 3300001M20 gene	3	0.468225	0.27929	3.35296	0.0219811	0.198601
H3016A06	Mm.173826	4933427L07Rik	RIKEN cDNA 4933427L07 gene	3	0.15035	0.089721	3.35152	0.0220047	0.198706
H3075E01	Mm.28240	Snx6	sorting nexin 6	3	0.487675	0.291158	3.3499	0.0220311	0.198835
H3023C09	Mm.29735	0610006H10Rik	RIKEN cDNA 0610006H10 gene	3	0.3209	0.191618	3.34937	0.0220397	0.198804
H3132F01	Mm.55211	C530015C18	hypothetical protein C530015C18	3	0.76215	0.45546	3.34673	0.022083	0.199085
H3071G08	Mm.103439	Gprc5b	G protein-coupled receptor, family C, group 5, member B	3	0.31505	0.18839	3.34465	0.0221171	0.199284
P115	Mm.2942	Asns	asparagine synthetase	3	0.6524	0.39035	3.34264	0.0221502	0.199473
H3141H09	Mm.291607	2700099C19Rik	RIKEN cDNA 2700099C19 gene	3	0.3275	0.196009	3.34168	0.022166	0.199506
H3056B05	Mm.129257	Supt3h	suppressor of Ty 3 homolog (S. cerevisiae)	3	0.4248	0.254448	3.33899	0.0222103	0.199796
H3147D09	Mm.272139	2310061K06Rik	RIKEN cDNA 2310061K06 gene	3	0.321375	0.192582	3.33755	0.0222343	0.199902
H3065H04	Mm.37551	1110001J12Rik	RIKEN cDNA 1110001J12 gene	3	0.52805	0.316693	3.33478	0.0222802	0.200205
H3016A09	Mm.41513	Klf16	Kruppel-like factor 16	3	0.192025	0.115188	3.33412	0.0222912	0.200195
H3009D12	Mm.4691	Nid1	nidogen 1	3	0.71865	0.431169	3.3335	0.0223015	0.200178
H3080B05	Mm.291731	1600013P15Rik	RIKEN cDNA 1600013P15 gene	3	0.3914	0.234879	3.33277	0.0223134	0.200177
H3100B05	Mm.218511	2310014H01Rik	RIKEN cDNA 2310014H01 gene	3	0.68815	0.412996	3.33248	0.0223183	0.200112
H3020D10	Mm.279195	Idh3a	isocitrate dehydrogenase 3 (NAD+) alpha	3	0.3144	0.188979	3.32736	0.0224036	0.200767
H3115A03	Mm.28659	Pes1	pescadillo homolog 1, containing BRCT domain (zebrafish)	3	0.3062	0.184126	3.32598	0.0224268	0.200865
H3154G06	Mm.29352	Ube2g2	ubiquitin-conjugating enzyme E2G 2	3	0.4284	0.257845	3.32292	0.0224779	0.201214
H3019E06	Mm.3973	Stx8	syntaxin 8	3	1.40465	0.845913	3.32103	0.0225098	0.20139
H3030E06	Mm.274852	Gldc	glycine decarboxylase	3	0.624925	0.376359	3.3209	0.022512	0.2013
H3079G05	Mm.272214		Mus musculus transcribed sequences	3	0.30985	0.186668	3.3198	0.0225304	0.201356
H3107C07	Mm.27911		Mus musculus transcribed sequence with moderate similarity to protein sp:P00722 (E. coli) BGAL_ECOLI Beta-galactosidase (Lactase)	3	0.13145	0.079211	3.31899	0.0225441	0.201369
P570	Mm.15691	Abcg1	ATP-binding cassette, sub-family G (WHITE), member 1	3	1.11023	0.669431	3.31692	0.0225789	0.20157
H3135F09	Mm.29999	MGC63429	similar to mitochondrial isoleucine tRNA synthetase	3	0.353775	0.21334	3.31654	0.0225853	0.201518
H3106B02	Mm.174063		Mus musculus transcribed sequences	3	0.417625	0.251879	3.31608	0.0225931	0.201478
H3105H04	Mm.174060		Mus musculus transcribed sequences	3	0.3848	0.232129	3.31539	0.0226047	0.201473
H3015H01			EST	3	0.4566	0.275504	3.31465	0.0226173	0.201476
P660	Mm.1776	Fth	ferritin heavy chain	3	0.320175	0.193196	3.31451	0.0226196	0.201388
H3159C05	Mm.260157	Rab3d	RAB3D, member RAS oncogene family	3	0.27745	0.167719	3.30852	0.0227213	0.202184
H3157C02	Mm.276502	1190005P08Rik	RIKEN cDNA 1190005P08 gene	3	0.77805	0.470353	3.30837	0.0227238	0.202097
P765	Mm.34953	Slc25a14	solute carrier family 25 (mitochondrial carrier, brain), member 14	3	0.492725	0.297941	3.30754	0.022738	0.202114
H3044B06	Mm.259876	Cstf3	cleavage stimulation factor, 3' pre-RNA, subunit 3	3	0.367825	0.222494	3.30638	0.0227576	0.20218
H3079H08	Mm.38198	2210409H23Rik	RIKEN cDNA 2210409H23 gene	3	0.3023	0.18291	3.30545	0.0227735	0.202211
H3151D12	Mm.195776	Lias	lipoic acid synthetase	3	0.6365	0.385344	3.30354	0.0228061	0.202392
H3096B03			EST	3	0.524825	0.317908	3.30174	0.0228369	0.202556
H3054E08	Mm.100665	D1Ertd251e	DNA segment, Chr 1, ERATO Doi 251, expressed	3	0.6209	0.376116	3.30164	0.0228386	0.202462
H3126F12	Mm.34329	Sephs1	selenophosphate synthetase 1	3	0.5065	0.306875	3.30102	0.0228492	0.202447
H3131F12	Mm.133872	Stfa1	stefin A1	3	0.434325	0.263228	3.29999	0.022867	0.202496
H3157A01			EST	3	0.5017	0.304211	3.29837	0.0228947	0.202632
H3142D09			EST	3	0.43135	0.261562	3.29827	0.0228965	0.202539
H3125F04	Mm.143166	Nif3l1	Ngg1 interacting factor 3-like 1 (S. pombe)	3	0.44875	0.272121	3.29817	0.0228981	0.202445
H3085A09			EST	3	0.138425	0.083951	3.29774	0.0229055	0.202402
H3078H05	Mm.27218	Morf4l2	mortality factor 4 like 2	3	0.31575	0.191523	3.29725	0.022914	0.202368
H3041C01			EST	3	0.20815	0.126278	3.2967	0.0229234	0.202342
H3117C09	Mm.290772	Rpl7	ribosomal protein L7	3	0.25765	0.156316	3.29652	0.0229265	0.202262
H3006B07	Mm.3752	Ranbp1	RAN binding protein 1	3	0.429	0.260301	3.29619	0.0229322	0.202204
H3060B11	Mm.29865	1110020C13Rik	RIKEN cDNA 1110020C13 gene	3	0.362	0.219814	3.2937	0.0229751	0.202474
H3099H04	Mm.3624	Guk1	guanylate kinase 1	3	0.345775	0.210122	3.29119	0.0230184	0.202747
H3107H07	Mm.17626		Mus musculus 10 days lactation, adult female mammary gland cDNA, RIKEN full-length enriched library, clone:D730048J04 product:unknown EST, full insert sequence	3	0.387025	0.235249	3.29034	0.0230331	0.202767
H3149A04	Mm.276299	Kctd2	potassium channel tetramerisation domain containing 2	3	0.568125	0.345385	3.28981	0.0230423	0.20274
H3050C06	Mm.35407	Frk	fyn-related kinase	3	0.35645	0.216789	3.28846	0.0230657	0.202838
H3068E04	Mm.202561	Styx	phosphoserine/threonine/tyrosine interaction protein	3	0.641675	0.39034	3.28778	0.0230775	0.202833
H3057B07	Mm.25613	Ier3	immediate early response 3	3	1.1381	0.692511	3.28688	0.0230931	0.202862
H3067F10	Mm.283046	Exo1	exonuclease 1	3	0.77155	0.469674	3.28547	0.0231175	0.202968
H3066F11	Mm.296510	4931433E08Rik	RIKEN cDNA 4931433E08 gene	3	0.483925	0.294672	3.2845	0.0231345	0.203009
T323	Mm.40678	Pde1a	phosphodiesterase 1A, calmodulin-dependent	3	0.457725	0.278729	3.28437	0.0231367	0.202921
H3073H01	Mm.212609	6030443O07Rik	RIKEN cDNA 6030443O07 gene	3	0.425775	0.259322	3.28376	0.0231473	0.202906
H3016C07	Mm.2769	Mlp	MARCKS-like protein	3	0.458025	0.279218	3.28077	0.0231994	0.203254
H3118H03	Mm.241387	0610041E09Rik	RIKEN cDNA 0610041E09 gene	3	0.42725	0.260548	3.27963	0.0232194	0.203321
H3080C04	Mm.155	2610204K14Rik	RIKEN cDNA 2610204K14 gene	3	0.240125	0.146439	3.27953	0.0232212	0.203228
H3017C11	Mm.143774	2400006H24Rik	RIKEN cDNA 2400006H24 gene	3	0.805725	0.491496	3.27867	0.0232363	0.203253
H3116E05	Mm.312888		Mus musculus transcribed sequences	3	0.30615	0.186779	3.2782	0.0232443	0.203215
H3084H11	Mm.260802	2310004N11Rik	RIKEN cDNA 2310004N11 gene	3	0.51645	0.315484	3.27401	0.0233179	0.20375
H3055G12	Mm.24816	F2r	coagulation factor II (thrombin) receptor	3	0.3855	0.235509	3.27376	0.0233224	0.203681
H3018H01	Mm.310987	Bub3	budding uninhibited by benzimidazoles 3 homolog (S. cerevisiae)	3	0.361775	0.221044	3.27333	0.0233299	0.203639
H3101B07			EST	3	1.06065	0.648835	3.2694	0.0233992	0.204135
H3107B02	Mm.268359	Cipp	channel-interacting PDZ domain protein	3	0.33435	0.204585	3.26857	0.0234138	0.204155
H3121B10	Mm.30099	C130052I12Rik	RIKEN cDNA C130052I12 gene	3	0.5339	0.32669	3.26855	0.0234142	0.20405
H3047B11	Mm.42368	4921513E08Rik	RIKEN cDNA 4921513E08 gene	3	0.177325	0.108533	3.26766	0.0234299	0.204079
H3021F04	Mm.13823	Dph2l2	diptheria toxin resistance protein required for diphthamide biosynthesis (Saccharomyces)-like 2	3	0.214625	0.131518	3.2638	0.0234981	0.204566
H3101G04	Mm.17780		Mus musculus transcribed sequences	3	0.3124	0.191522	3.26229	0.023525	0.204691
H3126C04	Mm.298145	Eif2ak1	eukaryotic translation initiation factor 2 alpha kinase 1	3	0.51175	0.313789	3.26175	0.0235347	0.204667
H3077G09	Mm.29508	Wbscr16	Williams-Beuren syndrome chromosome region 16 homolog (human)	3	0.72315	0.443439	3.26156	0.0235381	0.204589
H3063F02	Mm.20794	Anxa7	annexin A7	3	0.333925	0.204799	3.261	0.0235481	0.204568
H3026G03	Mm.251013	Kpnb1	karyopherin (importin) beta 1	3	0.329025	0.2019	3.25929	0.0235785	0.204724
H3126G07	Mm.49826	0610027A18Rik	RIKEN cDNA 0610027A18 gene	3	0.509375	0.312668	3.25825	0.023597	0.204777
H3136D01	Mm.19804	Spg4	spastic paraplegia 4 homolog (human)	3	0.748575	0.459563	3.25777	0.0236056	0.204743
H3057H06	Mm.5045	Slc16a2	solute carrier family 16 (monocarboxylic acid transporters), member 2	3	0.4607	0.282844	3.25762	0.0236081	0.204658
H3001B05	Mm.28172	Phemx	pan hematopoietic expression	3	0.48935	0.300859	3.25302	0.0236906	0.205264
P371	Mm.314183	Mest	mesoderm specific transcript	3	0.318125	0.195614	3.25259	0.0236983	0.205223
H3158H12	Mm.24788	2310047M15Rik	RIKEN cDNA 2310047M15 gene	3	0.48765	0.299902	3.25206	0.0237078	0.205197
H3100E11	Mm.291159		Mus musculus hypothetical LOC212052 (LOC212052), mRNA	3	0.36335	0.223474	3.25183	0.0237118	0.205125
H3015E04	Mm.209265	Gtl6	gene trap locus 6	3	0.26985	0.165978	3.25163	0.0237154	0.205048
H3048F10	Mm.290110	Dnajb6	DnaJ (Hsp40) homolog, subfamily B, member 6	3	0.60975	0.375198	3.25029	0.0237396	0.20515
H3128E03	Mm.282081	1110019J04Rik	RIKEN cDNA 1110019J04 gene	3	0.1668	0.10266	3.24955	0.0237529	0.205157
H3152E11	Mm.242324	set-02	septin 2	3	0.404125	0.248731	3.24949	0.023754	0.205058
H3064D04	Mm.173551		Mus musculus transcribed sequences	3	0.387525	0.238571	3.24872	0.0237678	0.205071
H3131A01			EST	3	0.562675	0.34649	3.24786	0.0237833	0.205097
H3009H08	Mm.22421	5730442A20Rik	RIKEN cDNA 5730442A20 gene	3	0.5985	0.368599	3.24743	0.0237911	0.205056
H3119F01	Mm.30251	Mcfd2	multiple coagulation factor deficiency 2	3	0.575825	0.354647	3.24731	0.0237932	0.204968
H3097E08	Mm.30506	AI316885	expressed sequence AI316885	3	0.993625	0.612004	3.24712	0.0237967	0.20489
H3058E02	Mm.312038		Mus musculus transcribed sequences	3	0.20295	0.125072	3.24532	0.0238291	0.205062
H3003D03	Mm.249759	4732496O19Rik	RIKEN cDNA 4732496O19 gene	3	0.167775	0.1034	3.24518	0.0238317	0.204978
H3011C10	Mm.102574	Pctk1	PCTAIRE-motif protein kinase 1	3	0.1198	0.073875	3.24333	0.0238652	0.205158
H3059H11	Mm.330096		Mus musculus transcribed sequences	3	0.163	0.100563	3.24174	0.0238939	0.205298
H3076E09	Mm.2519	2610018L09Rik	RIKEN cDNA 2610018L09 gene	3	0.3137	0.193653	3.23982	0.0239287	0.20549
H3017A08	Mm.25264	Ddx21	DEAD (Asp-Glu-Ala-Asp) box polypeptide 21	3	0.737175	0.455126	3.23943	0.0239358	0.205444
H3016F09	Mm.286399	0610009M14Rik	RIKEN cDNA 0610009M14 gene	3	0.283675	0.175139	3.23943	0.0239359	0.205337
H3093F11	Mm.201455	Scamp1	secretory carrier membrane protein 1	3	0.514925	0.318177	3.23672	0.0239851	0.205652
H3133F02	Mm.27293	4833420K19Rik	RIKEN cDNA 4833420K19 gene	3	0.192425	0.118939	3.23568	0.024004	0.205708
H3089E04	Mm.276881		Mus musculus transcribed sequence with weak similarity to protein ref:NP_443092.1 (H.sapiens) kruppel-like zinc finger protein [Homo sapiens]	3	0.5544	0.342842	3.23414	0.0240322	0.205842
H3040G07	Mm.20794	Anxa7	annexin A7	3	0.32565	0.201451	3.23305	0.0240522	0.205906
T206	Mm.582	Fabp4	fatty acid binding protein 4, adipocyte	3	0.542025	0.335406	3.23205	0.0240703	0.205954
H3117F06	Mm.270186	Rbbp7	retinoblastoma binding protein 7	3	0.33005	0.204245	3.23191	0.024073	0.20587
H3127E11	Mm.132973	Ctnnbl1	catenin, beta like 1	3	0.17215	0.106822	3.22313	0.0242342	0.207142
H3070F02	Mm.258094	B3gnt1	UDP-GlcNAc:betaGal beta-1,3-N-acetylglucosaminyltransferase 1	3	0.3462	0.215198	3.21751	0.0243383	0.207923
H3135F04	Mm.1161	Zfp185	zinc finger protein 185	3	0.3994	0.248672	3.21226	0.0244359	0.208649
H3004H09	Mm.332931		Mus musculus transcribed sequences	3	0.275275	0.171434	3.21145	0.0244511	0.20867
H3124G07	Mm.284252	Tdg	thymine DNA glycosylase	3	0.363125	0.226186	3.21085	0.0244622	0.208657
H3009E02	Mm.21187	1110005F07Rik	RIKEN cDNA 1110005F07 gene	3	0.4149	0.258714	3.2074	0.0245268	0.2091
H3121E12	Mm.212568	AI461788	expressed sequence AI461788	3	0.3572	0.222989	3.20374	0.0245955	0.209577
H3008F05	Mm.282700	Harsl	histidyl-tRNA synthetase-like	3	0.6102	0.380935	3.2037	0.0245962	0.209475
H3068F04	Mm.304188		Mus musculus transcribed sequences	3	0.3389	0.211739	3.20111	0.024645	0.209782
H3128F07	Mm.113388	Rnf4	ring finger protein 4	3	0.4512	0.281905	3.20108	0.0246455	0.209678
H3026D01	Mm.33324		Mus musculus adult retina cDNA, RIKEN full-length enriched library, clone:A930001C09 product:TAIL FIBROBLAST RECEPTOR FOR FELINE LEUKEMIA VIRUS SUBGROUP C homolog [Mus dunni], full insert sequence	3	0.131575	0.08221	3.20097	0.0246477	0.209588
H3034D02	Mm.74730	6230416J20Rik	RIKEN cDNA 6230416J20 gene	3	0.569225	0.355827	3.19945	0.0246764	0.209724
H3102H05	Mm.186143	Brip1	BRCA1 interacting protein C-terminal helicase 1	3	0.14735	0.092146	3.19818	0.0247003	0.209819
H3009D08			EST	3	0.313025	0.195857	3.19646	0.0247327	0.209986
H3144A05	Mm.292539	Slc31a2	solute carrier family 31, member 2	3	0.359825	0.225148	3.19633	0.0247352	0.209899
H3130E04	Mm.142570	1110065L07Rik	RIKEN cDNA 1110065L07 gene	3	0.342825	0.214543	3.19586	0.0247443	0.209868
H3017C08	Mm.121973	5031439G07Rik	RIKEN cDNA 5031439G07 gene	3	0.544675	0.341135	3.19331	0.0247925	0.210169
H3079A05	Mm.268926	Rnf141	ring finger protein 141	3	0.5583	0.349704	3.19298	0.0247988	0.210114
H3016G03	Mm.235523	Spg20	spastic paraplegia 20, spartin (Troyer syndrome) homolog (human)	3	0.644975	0.404201	3.19136	0.0248296	0.210267
H3033A03	Mm.45165	Stub1	STIP1 homology and U-Box containing protein 1	3	0.327225	0.205142	3.19023	0.0248512	0.210341
H3050G06	Mm.172963		Mus musculus transcribed sequences	3	0.2195	0.137665	3.18889	0.0248767	0.210449
H3002F04	Mm.29241	AA407659	expressed sequence AA407659	3	0.2837	0.177945	3.18863	0.0248818	0.210384
H3015D02	Mm.25161	Sirt2	sirtuin 2 (silent mating type information regulation 2, homolog) 2 (S. cerevisiae)	3	0.450475	0.282641	3.18761	0.0249012	0.21044
H3057A03	Mm.294520	Twistnb	TWIST neighbor	3	0.429275	0.269589	3.18467	0.0249574	0.210807
H3144G06	Mm.273195	Car1	carbonic anhydrase 1	3	0.424775	0.266842	3.18371	0.0249757	0.210853
H3059H09	Mm.28275	Rbmx	RNA binding motif protein, X chromosome	3	0.5379	0.337919	3.18361	0.0249777	0.210763
H3052E08	Mm.5002	9130213B05Rik	RIKEN cDNA 9130213B05 gene	3	0.3729	0.234551	3.17969	0.0250529	0.211289
H3089G12	Mm.278878	Slc30a5	solute carrier family 30 (zinc transporter), member 5	3	0.37345	0.234942	3.17909	0.0250646	0.211279
H3052C11	Mm.198817	Clta	clathrin, light polypeptide (Lca)	3	0.519775	0.327256	3.17656	0.0251132	0.211581
H3085H07	Mm.260703	Vps26	vacuolar protein sorting 26 (yeast)	3	0.491725	0.309775	3.17473	0.0251487	0.211771
H3019G02	Mm.102756	Mbnl3	muscleblind-like 3 (Drosophila)	3	0.91545	0.577412	3.17087	0.0252234	0.212292
H3089E12	Mm.5071	Sema3c	sema domain, immunoglobulin domain (Ig), short basic domain, secreted, (semaphorin) 3C	3	1.37452	0.867976	3.16719	0.0252949	0.212785
H3065C08	Mm.274432	Ppp3cb	protein phosphatase 3, catalytic subunit, beta isoform	3	0.51265	0.323963	3.16487	0.0253403	0.213057
H3142A08	Mm.301313	Uqcrc2	RIKubiquinol cytochrome c reductase core protein 2	3	0.111775	0.07071	3.16152	0.0254059	0.2135
H3024B01	Mm.18637	Tera	teratocarcinoma expressed, serine rich	3	0.7747	0.490261	3.16036	0.0254285	0.213582
H3102C09	Mm.174007		Mus musculus transcribed sequences	3	0.1893	0.119797	3.16034	0.0254289	0.213476
H3003F08	Mm.289942	Mtpn	myotrophin	3	0.112075	0.070959	3.15885	0.0254581	0.213612
H3148D06	Mm.21399	Itpa	inosine triphosphatase (nucleoside triphosphate pyrophosphatase)	3	0.32615	0.206528	3.1584	0.0254669	0.213577
H3101F03	Mm.273142	1200003M13Rik	RIKEN cDNA 1200003M13 gene	3	0.247325	0.156675	3.15717	0.0254911	0.213671
H3006B04	Mm.28063	5730466P16Rik	RIKEN cDNA 5730466P16 gene	3	0.5597	0.354951	3.15367	0.0255601	0.214141
H3047B05	Mm.276381	Tnpo3	transportin 3	3	0.3683	0.233581	3.15351	0.0255633	0.214058
H3044A12	Mm.323847		Mus musculus transcribed sequences	3	0.237575	0.150679	3.1534	0.0255656	0.213969
H3117G07	Mm.261665	Hist1h2ae	histone 1, H2ae	3	0.40565	0.257288	3.15327	0.025568	0.213881
H3005D03	Mm.13145	Umps	uridine monophosphate synthetase	3	0.527575	0.334633	3.15315	0.0255704	0.213792
H3013C08	Mm.182560		Mus musculus transcribed sequences	3	0.327075	0.207662	3.15007	0.0256312	0.214192
H3033H03	Mm.322377		Mus musculus transcribed sequences	3	0.289475	0.183928	3.14771	0.0256782	0.214475
T393	Mm.1051	Casp1	caspase 1	3	0.358075	0.227586	3.14672	0.0256978	0.214531
H3035C06	Mm.288634		Mus musculus 4 days neonate male adipose cDNA, RIKEN full-length enriched library, clone:B430101C18 product:HYPOTHETICAL 19.9 KDA PROTEIN homolog [Homo sapiens], full insert sequence	3	0.2442	0.15521	3.1467	0.0256982	0.214425
H3080F09	Mm.121918	4921528E07Rik	RIKEN cDNA 4921528E07 gene	3	0.153175	0.097376	3.14606	0.0257109	0.214422
H3085C02	Mm.19992	Ttrap	Traf and Tnf receptor associated protein	3	0.59025	0.375277	3.14568	0.0257185	0.214377
H3137H06	Mm.180013	Aes	amino-terminal enhancer of split	3	0.321275	0.204362	3.14418	0.0257483	0.214517
H3005H10	Mm.258927	Eef1d	eukaryotic translation elongation factor 1 delta (guanine nucleotide exchange protein)	3	0.520675	0.33143	3.14199	0.025792	0.214773
H3002C04	Mm.7087	Rabep1	rabaptin, RAB GTPase binding effector protein 1	3	0.3644	0.232039	3.14086	0.0258146	0.214852
H3109D06	Mm.165807	F8a	factor 8-associated gene A	3	0.571875	0.364319	3.13942	0.0258435	0.214984
H3068C09			EST	3	0.11995	0.076435	3.13862	0.0258594	0.215008
H3071C06	Mm.12468	Gbas	glioblastoma amplified sequence	3	0.157775	0.10055	3.13825	0.0258669	0.214961
H3010C04	Mm.298233	Pabpc1	poly A binding protein, cytoplasmic 1	3	0.50485	0.321814	3.13753	0.0258812	0.214972
H3120B01	Mm.200372	Coro1c	coronin, actin binding protein 1C	3	0.376825	0.240326	3.13595	0.0259129	0.215127
H3057C10	Mm.227549	Bpnt1	bisphosphate 3'-nucleotidase 1	3	0.3634	0.231881	3.13436	0.0259448	0.215283
H3113D09	Mm.30059	Marcks	myristoylated alanine rich protein kinase C substrate	3	0.622325	0.397116	3.13422	0.0259476	0.215198
H3103B02	Mm.35828	Wdr18	WD repeat domain 18	3	0.3701	0.236207	3.13369	0.0259583	0.215178
H3088E05	Mm.1114	Gla	galactosidase, alpha	3	0.890375	0.568391	3.13296	0.025973	0.215192
H3118C09	Mm.4502	Mcm3	minichromosome maintenance deficient 3 (S. cerevisiae)	3	0.5872	0.375306	3.12918	0.0260493	0.215715
H3076D07	Mm.29685	Dnajc8	DnaJ (Hsp40) homolog, subfamily C, member 8	3	0.5842	0.373484	3.12838	0.0260655	0.215741
H3031B08	Mm.33919	C330023M02Rik	RIKEN cDNA C330023M02 gene	3	0.327575	0.209469	3.12768	0.0260797	0.215751
H3066H11	Mm.272226	Msh4	mutS homolog 4 (E. coli)	3	0.4397	0.281243	3.12684	0.0260967	0.215783
H3135H02	Mm.276262	BC055915	cDNA sequence BC055915	3	0.333325	0.213277	3.12575	0.0261188	0.215857
H3098A06			EST	3	0.209375	0.134072	3.12332	0.0261681	0.216156
H3151D05	Mm.294882	F11r	F11 receptor	3	0.876425	0.561389	3.12234	0.026188	0.216212
H3012A08	Mm.44202	Yif1	Yip1 interacting factor homolog (S. cerevisiae)	3	0.589275	0.377471	3.12223	0.0261903	0.216123
H3030B07	Mm.2180	Hspcb	heat shock protein 1, beta	3	0.15885	0.101835	3.11975	0.0262408	0.216431
H3097A01			EST	3	0.402225	0.257922	3.11896	0.026257	0.216456
[truncated: 6,321 more rows]

## Sheet: Ewing fdr down
MPCs EWS-FLI1 TUMOR First Round Vs MPCs EWS-FLI1 before injection repressed genes
clone	UniGene	Gene.name	Annotation	DOF	M	STD	t	pvalue	fdr
H3034F01	Mm.34131	1500005K14Rik	RIKEN cDNA 1500005K14 gene	3	-3.81065	0.055032	-138.489	4.1506e-07	0.00683645
H3135D11	Mm.646	Tpm2	tropomyosin 2, beta	3	-1.1096	0.030619	-72.4777	2.89421e-06	0.0238352
H3057B08	Mm.11768	Plekhg1	pleckstrin homology domain containing, family G (with RhoGef domain) member 1	3	-0.3307	0.011336	-58.3432	5.5464e-06	0.0304516
H3096B05	Mm.257837	Atp11a	ATPase, class VI, type 11A	3	-0.527675	0.018359	-57.4827	5.79905e-06	0.023879
T324	Mm.277996	Pomc1	pro-opiomelanocortin-alpha	3	-0.924225	0.032336	-57.1637	5.8966e-06	0.0194246
H3147D02	Mm.274329	Phf12	PHD finger protein 12	3	-0.52695	0.019214	-54.8507	6.67382e-06	0.0183207
H3106C03			EST	3	-1.15705	0.054003	-42.8512	1.39862e-05	0.0329096
H3155B04	Mm.119936	Atrn	attractin	3	-0.640725	0.029995	-42.7219	1.41134e-05	0.0290578
H3034C05	Mm.290808		Mus musculus transcribed sequence with moderate similarity to protein ref:NP_171608.1 (H.sapiens) hypothetical protein MGC4655 [Homo sapiens]	3	-0.8154	0.039065	-41.7456	1.51255e-05	0.0276814
H3109C02	Mm.132958	Timp3	tissue inhibitor of metalloproteinase 3	3	-1.04	0.051321	-40.5294	1.65265e-05	0.0272208
H3053G08	Mm.135965	Frs2	fibroblast growth factor receptor substrate 2	3	-0.760725	0.042324	-35.9473	2.3672e-05	0.0354455
H3087A06	Mm.276081	Falz	fetal Alzheimer antigen	3	-1.20002	0.070829	-33.8853	2.82519e-05	0.0387781
H3133F09	Mm.103022		Mus musculus transcribed sequences	3	-0.704125	0.045336	-31.0625	3.66534e-05	0.0464398
H3097E03	Mm.21454	Cbr2	carbonyl reductase 2	3	-2.6902	0.180619	-29.7887	4.15458e-05	0.0488786
H3128F04	Mm.100117	5730406M06Rik	RIKEN cDNA 5730406M06 gene	3	-0.581325	0.039273	-29.6042	4.23254e-05	0.0464761
H3052F04	Mm.276271	Glg1	golgi apparatus protein 1	3	-1.84055	0.12743	-28.8873	4.55458e-05	0.0468865
H3154H12	Mm.126534	Paip2	polyadenylate-binding protein-interacting protein 2	3	-0.645875	0.045133	-28.6208	4.68263e-05	0.0453691
H3081F12	Mm.86595	Shc1	src homology 2 domain-containing transforming protein C1	3	-0.80155	0.05618	-28.5351	4.72484e-05	0.0432349
H3023F02	Mm.296409	Pip5k1b	phosphatidylinositol-4-phosphate 5-kinase, type 1 beta	3	-0.609275	0.043241	-28.1802	4.90503e-05	0.0425214
H3031C11	Mm.60590	Myo10	myosin X	3	-1.36015	0.096969	-28.0534	4.97167e-05	0.0409442
H3113E06	Mm.312776		Mus musculus transcribed sequence with weak similarity to protein pir:I38588 (H.sapiens) I38588 reverse transcriptase homolog - human retrotransposon L1	3	-0.73235	0.057849	-25.3193	6.75545e-05	0.0529853
H3112H01	Mm.104900	Asah2	N-acylsphingosine amidohydrolase 2	3	-0.5924	0.047803	-24.7848	7.20018e-05	0.0539064
H3112B11	Mm.180873	2510019J09Rik	RIKEN cDNA 2510019J09 gene	3	-0.794125	0.06495	-24.4536	7.49556e-05	0.053678
H3119F04	Mm.250425	4930470D19Rik	RIKEN cDNA 4930470D19 gene	3	-0.906975	0.075013	-24.1818	7.75014e-05	0.0531885
H3032C10	Mm.260207	Hmgcr	3-hydroxy-3-methylglutaryl-Coenzyme A reductase	3	-1.0361	0.086202	-24.0389	7.88855e-05	0.0519729
H3096A11	Mm.26722	Ndr2	N-myc downstream regulated 2	3	-2.44223	0.207472	-23.5426	8.39578e-05	0.0531873
H3082F04	Mm.34131	1500005K14Rik	RIKEN cDNA 1500005K14 gene	3	-2.86207	0.251231	-22.7844	9.2581e-05	0.0564778
H3003F11	Mm.212705	9130023P14Rik	RIKEN cDNA 9130023P14 gene	3	-0.78555	0.071331	-22.0255	0.000102435	0.0602575
T255	Mm.4709	Wnt10b	wingless related MMTV integration site 10b	3	-2.02462	0.186932	-21.6616	0.000107658	0.061146
H3118D04	Mm.29744	Slc29a1	solute carrier family 29 (nucleoside transporters), member 1	3	-1.2812	0.121092	-21.1608	0.000115441	0.0633811
H3153H10	Mm.202966	8030499H02Rik	RIKEN cDNA 8030499H02 gene	3	-0.44615	0.042227	-21.1309	0.00011593	0.0615961
H3126F04	Mm.87046	Gpr124	G protein-coupled receptor 124	3	-1.34217	0.13115	-20.4678	0.000127499	0.065626
H3070F07	Mm.209385	Lpp	LIM domain containing preferred translocation partner in lipoma	3	-1.08225	0.105821	-20.4544	0.000127748	0.0637619
H3024C08	Mm.7401	Hs1bp1	HS1 binding protein	3	-0.18755	0.018466	-20.3127	0.000130425	0.0631833
H3009H07	Mm.268053	6530402N02Rik	RIKEN cDNA 6530402N02 gene	3	-1.21535	0.122293	-19.876	0.000139158	0.0654877
H3112F12	Mm.271174		Mus musculus 10 days neonate skin cDNA, RIKEN full-length enriched library, clone:4732452F11 product:weakly similar to DC50 (DC23) [Homo sapiens], full insert sequence	3	-0.61115	0.06161	-19.8392	0.000139931	0.0640222
H3079H10	Mm.250909	Eif2s3y	eukaryotic translation initiation factor 2, subunit 3, structural gene Y-linked	3	-3.85968	0.391599	-19.7124	0.000142631	0.0634941
H3111D09	Mm.287851		Mus musculus 4 days neonate male adipose cDNA, RIKEN full-length enriched library, clone:B430101L16 product:unknown EST, full insert sequence	3	-0.857325	0.087333	-19.6336	0.000144345	0.062566
P910	Mm.101153	Irx5	Iroquois related homeobox 5 (Drosophila)	3	-1.2755	0.130948	-19.481	0.000147742	0.0623963
H3012F09	Mm.7524	Dag1	dystroglycan 1	3	-0.7505	0.077927	-19.2617	0.000152812	0.0629241
H3075F12	Mm.232525	Antxr1	anthrax toxin receptor 1	3	-1.08205	0.113234	-19.1117	0.000156415	0.062837
H3018D02	Mm.196464	Gnai2	guanine nucleotide binding protein, alpha inhibiting 2	3	-0.910425	0.095307	-19.1052	0.000156575	0.0614033
H3017D02	Mm.28842	Clcn3	chloride channel 3	3	-0.9267	0.097222	-19.0636	0.000157594	0.0603657
H3115F11	Mm.20348	Nid2	nidogen 2	3	-1.87843	0.198105	-18.964	0.000160075	0.0599225
H3036D07			EST	3	-0.560475	0.05928	-18.9094	0.000161454	0.0590959
T366	Mm.273117	Grb10	growth factor receptor bound protein 10	3	-0.736525	0.078375	-18.7949	0.000164404	0.0588672
H3037H08	Mm.1597	Mov10	Moloney leukemia virus 10	3	-1.24992	0.135343	-18.4705	0.000173157	0.0606824
H3108D12	Mm.280075	Dp1	deleted in polyposis 1	3	-0.84695	0.092628	-18.2872	0.000178379	0.06121
P331	Mm.88761	Tbx15	T-box 15	3	-0.685675	0.075019	-18.28	0.000178587	0.0600308
H3110D12	Mm.237594	Ufd1l	ubiquitin fusion degradation 1 like	3	-0.6561	0.072695	-18.0509	0.000185425	0.0610828
H3002D05	Mm.211212	Zfp288	zinc finger protein 288	3	-1.64415	0.184239	-17.848	0.000191773	0.0619351
H3113G03	Mm.269006	Agrn	agrin	3	-1.348	0.151067	-17.8464	0.000191823	0.06076
H3136A12			EST	3	-1.2614	0.141376	-17.8446	0.000191881	0.0596316
H3031E01	Mm.132958	Timp3	tissue inhibitor of metalloproteinase 3	3	-1.47237	0.165939	-17.746	0.000195074	0.0595012
T159	Mm.275010	Ptprf	protein tyrosine phosphatase, receptor type, F	3	-0.954525	0.107659	-17.7323	0.000195521	0.0585532
H3127A11	Mm.280068	Chc1l	chromosome condensation 1-like	3	-0.40855	0.046296	-17.6493	0.000198271	0.0583163
H3011H02			EST	3	-0.504575	0.057593	-17.5221	0.000202587	0.0585405
H3035G01	Mm.6370	Miz1	Msx-interacting-zinc finger	3	-0.39845	0.045693	-17.4403	0.000205429	0.0583383
H3006D04	Mm.1401	Cxcr4	chemokine (C-X-C motif) receptor 4	3	-0.4881	0.056368	-17.3183	0.000209767	0.0585605
H3011E11	Mm.262421	Coh1	Cohen syndrome homolog 1 (human)	3	-1.29802	0.149962	-17.3114	0.000210015	0.0576526
P407	Mm.250422	Serpine1	serine (or cysteine) proteinase inhibitor, clade E, member 1	3	-1.9387	0.225384	-17.2035	0.000213959	0.0577724
H3045D06	Mm.18347	Psmd7	proteasome (prosome, macropain) 26S subunit, non-ATPase, 7	3	-0.786375	0.09169	-17.1529	0.000215844	0.0573413
H3154F11	Mm.5027	Ezh1	enhancer of zeste homolog 1 (Drosophila)	3	-0.729325	0.085318	-17.0966	0.000217967	0.0569862
H3070F08	Mm.193925	Gna13	guanine nucleotide binding protein, alpha 13	3	-1.0313	0.120864	-17.0654	0.000219153	0.0564011
H3009F01	Mm.13705	Rrbp1	ribosome binding protein 1	3	-1.16112	0.136594	-17.0011	0.000221631	0.0561613
H3149E10	Mm.176695	2310035M22Rik	RIKEN cDNA 2310035M22 gene	3	-0.3852	0.045488	-16.9364	0.000224159	0.0559414
H3150F04	Mm.251774	2310075M15Rik	RIKEN cDNA 2310075M15 gene	3	-0.534	0.063139	-16.915	0.000225003	0.0553138
P286	Mm.195663	Cdkn1a	cyclin-dependent kinase inhibitor 1A (P21)	3	-1.23885	0.146591	-16.9021	0.000225514	0.054624
H3002C07	Mm.646	Tpm2	tropomyosin 2, beta	3	-1.18722	0.143889	-16.502	0.000242171	0.0578087
H3019A05	Mm.7524	Dag1	dystroglycan 1	3	-0.6551	0.080257	-16.3251	0.000250057	0.0588384
H3013E04	Mm.8687	Cap1	CAP, adenylate cyclase-associated protein 1 (yeast)	3	-0.642375	0.079458	-16.1689	0.000257306	0.0596913
H3067A05	Mm.208955	BC031353	cDNA sequence BC031353	3	-1.46565	0.181455	-16.1545	0.000257991	0.0590191
H3039G10	Mm.327812		Mus musculus 3 days neonate thymus cDNA, RIKEN full-length enriched library, clone:A630040H14 product:unknown EST, full insert sequence	3	-1.294	0.161152	-16.0594	0.000262557	0.0592408
H3065B11			EST	3	-0.3437	0.042837	-16.0467	0.000263175	0.0585777
H3025D05	Mm.286863	2810025M15Rik	RIKEN cDNA 2810025M15 gene	3	-0.74325	0.093491	-15.9	0.000270458	0.0593961
H3089D04	Mm.45506	Nkd2	naked cuticle 2 homolog (Drosophila)	3	-1.30005	0.164558	-15.8005	0.000275552	0.0597186
H3129G03	Mm.234551	Cd3z	CD3 antigen, zeta polypeptide	3	-0.58925	0.075035	-15.7059	0.000280509	0.0600034
H3071F07			EST	3	-0.690025	0.088109	-15.663	0.000282798	0.0597175
H3099A11	Mm.40370	Ssa2	Sjogren syndrome antigen A2	3	-0.3097	0.039799	-15.5633	0.000288214	0.0600908
H3046D03	Mm.227	Itgav	integrin alpha V	3	-1.42952	0.184227	-15.5192	0.000290658	0.0598428
H3082C12	Mm.288474	Spp1	secreted phosphoprotein 1	3	-1.40675	0.18173	-15.4818	0.000292748	0.059529
H3158G06	Mm.24477	D14Wsu89e	DNA segment, Chr 14, Wayne State University 89, expressed	3	-0.812875	0.10621	-15.3069	0.000302791	0.0608203
H3151G08	Mm.11815	B230312B02Rik	RIKEN cDNA B230312B02 gene	3	-0.5522	0.072215	-15.2932	0.000303597	0.0602475
H3034C04	Mm.5507		Mus musculus transcribed sequence with weak similarity to protein ref:NP_081764.1 (M.musculus) RIKEN cDNA 5730493B19 [Mus musculus]	3	-0.378625	0.049551	-15.2822	0.000304247	0.0596578
H3002B01			EST	3	-0.686125	0.089812	-15.2792	0.000304427	0.0589907
H3138E11	Mm.34404	Sema4g	sema domain, immunoglobulin domain (Ig), transmembrane domain (TM) and short cytoplasmic domain, (semaphorin) 4G	3	-0.728825	0.095661	-15.2376	0.000306902	0.0587788
H3070B04	Mm.9852	Apg12l	autophagy 12-like (S. cerevisiae)	3	-0.706725	0.093439	-15.1269	0.000313615	0.0593742
H3048H11			EST	3	-0.6973	0.092546	-15.0693	0.000317192	0.0593689
H3131B07	Mm.259260		Mus musculus 10, 11 days embryo whole body cDNA, RIKEN full-length enriched library, clone:2810410A03 product:unknown EST, full insert sequence	3	-1.3947	0.186662	-14.9436	0.000325175	0.0601794
H3053H09			EST	3	-0.6576	0.08853	-14.8559	0.000330904	0.060559
H3108C03	Mm.262117	Trex1	three prime repair exonuclease 1	3	-0.7523	0.101675	-14.7981	0.000334755	0.0605907
H3010G07	Mm.42040	Ak4	adenylate kinase 4	3	-0.5864	0.079257	-14.7975	0.000334799	0.05994
H3049H04	Mm.2180	Hspcb	heat shock protein 1, beta	3	-0.594325	0.080333	-14.7965	0.000334867	0.0593075
H3089G07	Mm.293175	A630082K20Rik	RIKEN cDNA A630082K20 gene	3	-0.84925	0.115061	-14.7618	0.000337208	0.0590868
H3127E09			EST	3	-0.957175	0.13	-14.7258	0.00033966	0.0588899
H3135H11	Mm.196239	1010001H21Rik	RIKEN cDNA 1010001H21 gene	3	-0.724775	0.098438	-14.7256	0.000339674	0.0582788
T365	Mm.214554	Grb14	growth factor receptor bound protein 14	3	-1.63587	0.222347	-14.7146	0.000340424	0.0578054
H3020G09	Mm.104617	9930104H07Rik	RIKEN cDNA 9930104H07 gene	3	-2.16885	0.29971	-14.473	0.000357562	0.0600959
H3094D12	Mm.290652		Mus musculus similar to solute carrier family 7 (cationic amino acid transporter, y+ system), member 3 (LOC245128), mRNA	3	-0.568	0.07866	-14.4419	0.000359849	0.0598694
H3019B10	Mm.217318	Mtap4	microtubule-associated protein 4	3	-0.60465	0.084557	-14.3016	0.000370421	0.061012
H3029G05	Mm.291235	Dgka	diacylglycerol kinase, alpha	3	-1.11193	0.155563	-14.2955	0.000370888	0.0604841
H3066G05	Mm.159915	D1Ucla4	DNA segment, Chr 1, University of California at Los Angeles 4	3	-0.41915	0.05872	-14.2761	0.000372384	0.0601326
H3089A01	Mm.28357	Map1lc3	microtubule-associated protein 1 light chain 3	3	-0.38465	0.053971	-14.254	0.000374097	0.0598228
P500	Mm.179747	Itga7	integrin alpha 7	3	-2.85295	0.401621	-14.2072	0.000377767	0.0598288
H3120B07	Mm.21109	Gsn	gelsolin	3	-1.28093	0.181084	-14.1473	0.000382525	0.0600055
T287	Mm.41580	Rab3b	RAB3B, member RAS oncogene family	3	-0.776075	0.110038	-14.1055	0.000385896	0.0599631
H3034C06	Mm.27186	C76566	expressed sequence C76566	3	-0.77825	0.111338	-13.98	0.000396257	0.0609977
H3110F12	Mm.294777	1300010O06Rik	RIKEN cDNA 1300010O06 gene	3	-1.77517	0.254511	-13.9497	0.000398815	0.060823
H3093A02	Mm.118297		Mus musculus 12 days embryo embryonic body between diaphragm region and neck cDNA, RIKEN full-length enriched library, clone:9430096L22 product:hypothetical protein, full insert sequence	3	-0.415025	0.059797	-13.8811	0.000404686	0.0611522
P759	Mm.4723	Sct	secretin	3	-1.02497	0.148215	-13.831	0.000409045	0.0612489
H3117B01	Mm.294136	Ccnd2	cyclin D2	3	-1.14158	0.165359	-13.8072	0.00041113	0.0610065
H3114D12	Mm.4269	Tcf4	transcription factor 4	3	-1.13505	0.164999	-13.7583	0.000415478	0.0611012
H3074C03	Mm.268185	2610510D13Rik	RIKEN cDNA 2610510D13 gene	3	-0.4064	0.059218	-13.7257	0.000418411	0.060988
H3140C04	Mm.303629		Mus musculus adult male pituitary gland cDNA, RIKEN full-length enriched library, clone:5330429B09 product:unknown EST, full insert sequence	3	-1.32812	0.1949	-13.6288	0.000427282	0.0617347
H3043G01	Mm.172769		Mus musculus transcribed sequence with weak similarity to protein ref:NP_081764.1 (M.musculus) RIKEN cDNA 5730493B19 [Mus musculus]	3	-0.173275	0.025471	-13.6055	0.000429453	0.0615089
H3147E11	Mm.275010	Ptprf	protein tyrosine phosphatase, receptor type, F	3	-1.08685	0.159873	-13.5964	0.0004303	0.0610989
H3001D01	Mm.156452	4432404J10Rik	RIKEN cDNA 4432404J10 gene	3	-0.925525	0.13649	-13.5618	0.000433561	0.0610358
H3092H01	Mm.217787	Atp6v1a1	ATPase, H+ transporting, V1 subunit A, isoform 1	3	-0.753825	0.11209	-13.4504	0.000444287	0.0620156
H3149A09	Mm.80556		Mus musculus transcribed sequences	3	-1.01228	0.150588	-13.4443	0.000444879	0.0615766
H3034H03	Mm.27913	2610016F04Rik	RIKEN cDNA 2610016F04 gene	3	-0.678775	0.101209	-13.4133	0.00044793	0.0614821
H3082G08	Mm.60590	Myo10	myosin X	3	-1.16003	0.173018	-13.4093	0.000448328	0.0610281
H3023E01	Mm.42944	Skp1a	S-phase kinase-associated protein 1A	3	-0.542125	0.081254	-13.344	0.000454858	0.0614095
H3055F03	Mm.290582	2900005O08Rik	RIKEN cDNA 2900005O08 gene	3	-0.5344	0.080461	-13.2834	0.000461019	0.0617353
H3111F12	Mm.247113	A230103N10Rik	RIKEN cDNA A230103N10 gene	3	-0.2884	0.04363	-13.2202	0.000467581	0.0621091
H3020G05	Mm.117709	1110001A05Rik	RIKEN cDNA 1110001A05 gene	3	-0.84415	0.128993	-13.0883	0.000481662	0.0634677
H3093E03	Mm.51136	Csnk2a2	casein kinase II, alpha 2, polypeptide	3	-0.467775	0.071693	-13.0493	0.000485928	0.0635216
H3103A08	Mm.90496	Dctn6	dynactin 6	3	-0.7005	0.108066	-12.9643	0.000495418	0.0642522
H3064E02	Mm.217787	Atp6v1a1	ATPase, H+ transporting, V1 subunit A, isoform 1	3	-0.57015	0.087989	-12.9596	0.00049595	0.0638186
H3021C01	Mm.8040	Prkch	protein kinase C, eta	3	-0.527075	0.081581	-12.9215	0.00050028	0.0638768
H3137D02	Mm.254096	Hnrpl	heterogeneous nuclear ribonucleoprotein L	3	-0.3524	0.054589	-12.9111	0.00050148	0.0635376
H3131B11	Mm.276271	Glg1	golgi apparatus protein 1	3	-1.36068	0.211256	-12.8818	0.000504861	0.0634775
H3116B03	Mm.277408	Mcpr	meiotic check point regulator	3	-0.752225	0.116934	-12.8658	0.00050672	0.0632286
H3027A08	Mm.157075	2510004L20Rik	RIKEN cDNA 2510004L20 gene	3	-0.726	0.112919	-12.8588	0.000507535	0.0628542
H3052G07	Mm.311664		Mus musculus 12 days embryo spinal cord cDNA, RIKEN full-length enriched library, clone:C530037D01 product:hypothetical protein, full insert sequence	3	-0.6342	0.098673	-12.8546	0.000508025	0.0624453
H3025A09	Mm.850	Srp14	signal recognition particle 14	3	-0.618375	0.096675	-12.7928	0.000515314	0.0628721
H3117B04	Mm.280560	9030425E11Rik	RIKEN cDNA 9030425E11 gene	3	-1.09852	0.172272	-12.7534	0.00052004	0.0629822
H3109D02	Mm.100460	4930504E06Rik	RIKEN cDNA 4930504E06 gene	3	-0.39905	0.062614	-12.7463	0.000520892	0.0626249
H3038H03	Mm.21500	Mib1	mindbomb homolog 1 (Drosophila)	3	-0.337275	0.052927	-12.745	0.000521055	0.0621906
H3076G06	Mm.293120	Stat2	signal transducer and activator of transcription 2	3	-1.0393	0.163365	-12.7237	0.000523636	0.062049
H3109H03	Mm.21288	Ell2	elongation factor RNA polymerase II 2	3	-0.9582	0.150798	-12.7084	0.000525503	0.0618254
H3114C01	Mm.294589		Mus musculus hypothetical LOC234582 (LOC234582), mRNA	3	-1.13498	0.17915	-12.6706	0.000530142	0.0619288
H3079G02	Mm.89959	Mthfr	5,10-methylenetetrahydrofolate reductase	3	-0.5271	0.083344	-12.6487	0.000532861	0.0618081
H3150H03	Mm.194153		Mus musculus transcribed sequences	3	-0.6152	0.097413	-12.6307	0.00053511	0.0616349
H3089B02	Mm.276063	Scyl1	SCY1-like 1 (S. cerevisiae)	3	-0.244975	0.038815	-12.6228	0.000536103	0.0613205
H3071A12	Mm.209517		Mus musculus transcribed sequences	3	-0.8456	0.134617	-12.5631	0.00054367	0.0617571
H3051C08	Mm.41423	2310067E08Rik	RIKEN cDNA 2310067E08 gene	3	-1.20685	0.192604	-12.5319	0.000547673	0.0617857
H3074C11			EST	3	-0.813675	0.130471	-12.4729	0.000555362	0.062227
H3125E09	Mm.208138		Mus musculus 15 days embryo head cDNA, RIKEN full-length enriched library, clone:D930008O12 product:unclassifiable, full insert sequence	3	-2.393	0.383769	-12.471	0.00055561	0.0618341
T149	Mm.276702	Grb7	growth factor receptor bound protein 7	3	-0.682625	0.109718	-12.4432	0.000559287	0.0618256
H3071F03	Mm.271168	1110046H09Rik	RIKEN cDNA 1110046H09 gene	3	-1.67318	0.269046	-12.4378	0.000560003	0.0614921
H3025E11	Mm.182525		Mus musculus transcribed sequences	3	-0.216925	0.034884	-12.4369	0.000560126	0.0610982
T181	Mm.5028	Inppl1	inositol polyphosphate phosphatase-like 1	3	-0.413475	0.066588	-12.419	0.000562517	0.0609554
H3062B02	Mm.173499		Mus musculus transcribed sequences	3	-0.515275	0.083167	-12.3913	0.000566237	0.0609574
H3112B12	Mm.180873	2510019J09Rik	RIKEN cDNA 2510019J09 gene	3	-0.605175	0.097684	-12.3905	0.000566354	0.0605741
H3151C07	Mm.40303		Mus musculus 0 day neonate cerebellum cDNA, RIKEN full-length enriched library, clone:C230098O21 product:unknown EST, full insert sequence	3	-1.10665	0.17976	-12.3125	0.000577008	0.0613155
H3028G02	Mm.153183	Zap3	ZAP3 protein	3	-0.5316	0.086375	-12.3091	0.000577488	0.0609731
H3019H12	Mm.220982	Dysf	dysferlin	3	-2.46275	0.401646	-12.2633	0.000583876	0.061255
H3009G06	Mm.244912	Papss1	3'-phosphoadenosine 5'-phosphosulfate synthase 1	3	-0.52945	0.086436	-12.2506	0.000585657	0.0610529
H3158B03	Mm.1410	Il18	interleukin 18	3	-0.7691	0.126265	-12.1823	0.000595407	0.0616789
H3082E06	Mm.275648	1110003B01Rik	RIKEN cDNA 1110003B01 gene	3	-0.763175	0.125539	-12.1584	0.000598876	0.0616505
H3070H11	Mm.12067	4933426L22Rik	RIKEN cDNA 4933426L22 gene	3	-0.860675	0.141586	-12.1576	0.000598985	0.0612788
P472	Mm.57038	Hes2	hairy and enhancer of split 2 (Drosophila)	3	-0.65455	0.107859	-12.1371	0.000601974	0.0612044
H3114E02	Mm.18347	Psmd7	proteasome (prosome, macropain) 26S subunit, non-ATPase, 7	3	-0.87685	0.1445	-12.1363	0.000602092	0.0608408
P210	Mm.25246	Spink4	serine protease inhibitor, Kazal type 4	3	-0.6821	0.112579	-12.1177	0.000604826	0.0607444
H3130F06	Mm.26934	Lgals2	lectin, galactose-binding, soluble 2	3	-0.85965	0.142722	-12.0465	0.000615439	0.0614357
H3128C11	Mm.136238		Mus musculus adult male corpora quadrigemina cDNA, RIKEN full-length enriched library, clone:B230308F23 product:unknown EST, full insert sequence	3	-1.52115	0.253169	-12.0169	0.000619934	0.0615116
H3045H09	Mm.172813		Mus musculus transcribed sequences	3	-0.19615	0.032698	-11.9976	0.000622879	0.0614338
H3054E07	Mm.37985	2610019A05Rik	RIKEN cDNA 2610019A05 gene	3	-0.6655	0.110981	-11.993	0.00062358	0.0611368
T110	Mm.206934	Mbtps1	membrane-bound transcription factor protease, site 1	3	-0.583525	0.097755	-11.9386	0.000632007	0.0615963
P473	Mm.3516	Hes3	hairy and enhancer of split 3 (Drosophila)	3	-0.70595	0.118302	-11.9347	0.000632618	0.0612932
H3127H11	Mm.10313	Ankfy1	ankyrin repeat and FYVE domain containing 1	3	-0.551275	0.092497	-11.9198	0.000634948	0.0611592
H3031A07	Mm.245357	G630041M05Rik	RIKEN cDNA G630041M05 gene	3	-0.755825	0.128046	-11.8055	0.000653256	0.0625569
P599	Mm.35605	Cdh1	cadherin 1	3	-0.889425	0.150744	-11.8005	0.000654071	0.0622728
H3105D10	Mm.17871		Mus musculus transcribed sequences	3	-0.4931	0.08394	-11.7488	0.000662594	0.0627218
H3142C11	Mm.282863	Bpgm	2,3-bisphosphoglycerate mutase	3	-0.42135	0.071778	-11.7404	0.000663987	0.0624945
N809	Mm.29564	Mmp2	matrix metalloproteinase 2	3	-1.02487	0.174753	-11.7294	0.000665834	0.0623122
H3078A08	Mm.274819	Orc3l	origin recognition complex, subunit 3-like (S. cerevisiae)	3	-0.857775	0.146266	-11.7289	0.000665908	0.061967
H3077E03	Mm.3741	A430081P20Rik	RIKEN cDNA A430081P20 gene	3	-0.37775	0.064428	-11.7263	0.000666352	0.06166
H3130E03	Mm.5098	Gli3	GLI-Kruppel family member GLI3	3	-0.422675	0.072147	-11.7171	0.000667892	0.0614572
H3032H08	Mm.188105	2300006M17Rik	RIKEN cDNA 2300006M17 gene	3	-0.822225	0.140845	-11.6756	0.000674913	0.0617583
H3111A09	Mm.251303	BC006583	cDNA sequence BC006583	3	-0.8854	0.152009	-11.6493	0.000679419	0.0618271
H3152H06	Mm.38832	1600019O04Rik	RIKEN cDNA 1600019O04 gene	3	-1.14488	0.197064	-11.6193	0.000684597	0.061956
H3017B04	Mm.30455	Atp8b2	Atpase, class I, type 8B, member 2	3	-0.90805	0.15653	-11.6022	0.00068758	0.0618859
T381	Mm.1231	Cyr61	cysteine rich protein 61	3	-2.01087	0.347296	-11.5802	0.000691443	0.0618954
P114	Mm.18888	Lum	lumican	3	-3.5621	0.616065	-11.564	0.000694294	0.0618147
H3153B06	Mm.25504	5830434P21Rik	RIKEN cDNA 5830434P21 gene	3	-0.93385	0.162303	-11.5075	0.0007044	0.0623773
H3115G08	Mm.29257	6530405F15Rik	RIKEN cDNA 6530405F15 gene	3	-1.50195	0.261514	-11.4866	0.000708185	0.0623771
T378	Mm.8681	Ptpn11	protein tyrosine phosphatase, non-receptor type 11	3	-0.701675	0.122408	-11.4646	0.000712195	0.0623967
H3156B03	Mm.29742	Sesn1	sestrin 1	3	-0.8855	0.154682	-11.4493	0.000714993	0.0623104
H3156G06	Mm.27913	2610016F04Rik	RIKEN cDNA 2610016F04 gene	3	-0.5396	0.094432	-11.4284	0.000718862	0.0623178
H3099F03	Mm.211211	2310032D16Rik	RIKEN cDNA 2310032D16 gene	3	-0.808075	0.141615	-11.4123	0.000721854	0.0622495
H3143H12	Mm.253800	Gls	glutaminase	3	-0.473975	0.083195	-11.3943	0.000725206	0.0622128
H3120D01	Mm.27041	Map3k3	mitogen activated protein kinase kinase kinase 3	3	-0.5662	0.099428	-11.3891	0.000726187	0.0619743
H3150E11	Mm.236454	AW822216	expressed sequence AW822216	3	-1.0557	0.185734	-11.3678	0.000730193	0.0619949
H3009F11	Mm.13705	Rrbp1	ribosome binding protein 1	3	-1.15275	0.203103	-11.3514	0.000733313	0.0619405
H3109H07	Mm.310899		Mus musculus transcribed sequence with weak similarity to protein ref:NP_081764.1 (M.musculus) RIKEN cDNA 5730493B19 [Mus musculus]	3	-0.8105	0.143192	-11.3205	0.000739225	0.0621213
H3074F10	Mm.252542	D10Ertd718e	DNA segment, Chr 10, ERATO Doi 718, expressed	3	-0.443575	0.078386	-11.3178	0.000739752	0.06185
H3144A11	Mm.275309	Skiv2l	superkiller viralicidic activity 2-like (S. cerevisiae )	3	-0.600575	0.106322	-11.2973	0.0007437	0.0618661
H3117E02	Mm.287693	Pcdhga12	protocadherin gamma subfamily A, 12	3	-0.818075	0.144839	-11.2964	0.000743887	0.0615706
H3044G04	Mm.25044	Fliih	flightless I homolog (Drosophila)	3	-0.31655	0.056091	-11.2871	0.000745691	0.0614114
H3050A01	Mm.46401	Son	Son cell proliferation protein	3	-0.72805	0.129163	-11.2734	0.000748364	0.0613249
H3057H01	Mm.257371	BC010245	cDNA sequence BC010245	3	-1.0148	0.180683	-11.2329	0.000756325	0.0616705
H3138B02	Mm.13437	4833420O05Rik	RIKEN cDNA 4833420O05 gene	3	-0.2309	0.041139	-11.2255	0.000757806	0.0614868
H3079A11	Mm.5296	BC013565	cDNA sequence BC013565	3	-1.03665	0.184841	-11.2166	0.000759562	0.0613272
H3088D12	Mm.248613	1700020H17Rik	RIKEN cDNA 1700020H17 gene	3	-0.294475	0.052755	-11.1638	0.000770195	0.0618824
H3131E09	Mm.103262	AU021107	expressed sequence AU021107	3	-1.08872	0.195764	-11.1228	0.000778578	0.0622522
T301	Mm.4687	Grpr	gastrin releasing peptide receptor	3	-0.969275	0.174322	-11.1205	0.000779057	0.0619896
H3004F08	Mm.180873	2510019J09Rik	RIKEN cDNA 2510019J09 gene	3	-0.676325	0.1218	-11.1055	0.000782151	0.0619366
H3038D07	Mm.24972	Mvp	major vault protein	3	-0.61585	0.111202	-11.0763	0.000788243	0.0621203
H3014B03	Mm.86382	6430573D20Rik	RIKEN cDNA 6430573D20 gene	3	-0.99855	0.180821	-11.0446	0.000794907	0.0623472
H3112A07	Mm.294136	Ccnd2	cyclin D2	3	-1.36615	0.247507	-11.0393	0.000796044	0.0621405
H3061H04	Mm.148721	Atp5f1	ATP synthase, H+ transporting, mitochondrial F0 complex, subunit b, isoform 1	3	-0.554425	0.100534	-11.0296	0.000798093	0.0620065
H3048A09	Mm.209385	Lpp	LIM domain containing preferred translocation partner in lipoma	3	-0.829175	0.150971	-10.9846	0.000807757	0.0624628
H3005G11	Mm.239329	Lbcl1	lymphoid blast crisis-like 1	3	-0.467775	0.085281	-10.9702	0.00081087	0.0624105
H3135F02	Mm.265512	Sec8	SEC8 (S. cerevisiae)	3	-0.762275	0.139489	-10.9295	0.000819792	0.0628037
H3116D09	Mm.258589	Map3k7	mitogen activated protein kinase kinase kinase 7	3	-0.51905	0.095103	-10.9155	0.000822891	0.0627492
H3129B10	Mm.208855	AW551984	expressed sequence AW551984	3	-2.40318	0.443424	-10.8392	0.000840046	0.0637622
H3147B01	Mm.2901	Tyro3	TYRO3 protein tyrosine kinase 3	3	-0.341125	0.062963	-10.8357	0.000840848	0.0635303
H3054D01	Mm.295013	Vps11	vacuolar protein sorting 11 (yeast)	3	-0.295225	0.054595	-10.8151	0.000845543	0.0635933
H3062B08	Mm.2115	Hnrpu	heterogeneous nuclear ribonucleoprotein U	3	-0.50405	0.093537	-10.7776	0.000854232	0.0639548
H3066F03	Mm.72773	Drctnnb1a	down-regulated by Ctnnb1, a	3	-0.343725	0.063867	-10.7637	0.000857478	0.0639074
H3009E04	Mm.286536	2410043F08Rik	RIKEN cDNA 2410043F08 gene	3	-0.42705	0.079472	-10.7472	0.000861347	0.0639065
H3088C11	Mm.156452	4432404J10Rik	RIKEN cDNA 4432404J10 gene	3	-0.4558	0.084835	-10.7455	0.000861754	0.06365
H3036C12	Mm.30012	Hdlbp	high density lipoprotein (HDL) binding protein	3	-0.4067	0.075937	-10.7115	0.000869811	0.0639583
H3108C10	Mm.260347		Mus musculus transcribed sequences	3	-0.239175	0.044659	-10.7113	0.000869874	0.0636786
H3058G08	Mm.271168	1110046H09Rik	RIKEN cDNA 1110046H09 gene	3	-1.50265	0.280725	-10.7055	0.000871251	0.0634972
H3042G07	Mm.2180	Hspcb	heat shock protein 1, beta	3	-0.607825	0.11366	-10.6955	0.000873644	0.0633912
H3042B03	Mm.4219	Man2b1	mannosidase 2, alpha B1	3	-0.8084	0.151344	-10.683	0.000876661	0.0633311
H3141D05	Mm.197280		Mus musculus transcribed sequences	3	-1.24195	0.232538	-10.6817	0.000876967	0.0630765
H3057B09	Mm.297833	Ube2h	ubiquitin-conjugating enzyme E2H	3	-0.4548	0.085363	-10.6557	0.000883274	0.0632539
H3093A05	Mm.259500	4921518A06Rik	RIKEN cDNA 4921518A06 gene	3	-0.9852	0.184942	-10.6541	0.000883651	0.063007
P814	Mm.154144	Arg1	arginase 1, liver	3	-1.4216	0.267689	-10.6213	0.000891711	0.0633076
P379	Mm.280175	Mmp14	matrix metalloproteinase 14 (membrane-inserted)	3	-1.25795	0.237388	-10.5983	0.000897404	0.0634384
H3141F03	Mm.275800	Slc12a7	solute carrier family 12, member 7	3	-0.85405	0.161709	-10.5628	0.000906293	0.063793
H3119D08	Mm.288098	Clk2	CDC-like kinase 2	3	-0.366675	0.069501	-10.5517	0.000909093	0.0637178
H3087F02	Mm.19893	Gfpt1	glutamine fructose-6-phosphate transaminase 1	3	-0.301275	0.057339	-10.5085	0.000920103	0.0642161
H3136C01	Mm.170519		Mus musculus transcribed sequences	3	-0.745425	0.142721	-10.4459	0.000936396	0.0650775
H3047G08	Mm.272878	Crebbp	CREB binding protein	3	-0.86715	0.166274	-10.4304	0.000940493	0.0650876
H3132F06	Mm.103199	Plagl2	pleiomorphic adenoma gene-like 2	3	-0.5124	0.098646	-10.3887	0.000951618	0.065582
T122	Mm.3213	Ldlr	low density lipoprotein receptor	3	-0.6613	0.127466	-10.3761	0.000955007	0.0655413
H3119B02	Mm.22565	9130011J15Rik	RIKEN cDNA 9130011J15 gene	3	-0.67585	0.13046	-10.3611	0.000959074	0.0655473
H3082D07	Mm.4269	Tcf4	transcription factor 4	3	-1.04905	0.202773	-10.347	0.000962898	0.0655367
H3005D12	Mm.197387	Bicd2	bicaudal D homolog 2 (Drosophila)	3	-0.68975	0.133339	-10.3458	0.00096323	0.0652896
H3131D09	Mm.181074	2610001E17Rik	RIKEN cDNA 2610001E17 gene	3	-1.08295	0.210013	-10.3132	0.000972205	0.0656278
H3082G04			EST	3	-0.853175	0.165644	-10.3013	0.000975488	0.0655807
H3008B08	Mm.231802	Pura	purine rich element binding protein A	3	-0.522875	0.101588	-10.294	0.000977524	0.0654504
H3023D07	Mm.132172	D630041K24Rik	RIKEN cDNA D630041K24 gene	3	-0.75675	0.147039	-10.2932	0.000977742	0.0652
H3158H06	Mm.250391	BC035291	cDNA sequence BC035291	3	-0.54515	0.106182	-10.2683	0.000984731	0.0654012
H3090H10	Mm.239247	Asph	aspartate-beta-hydroxylase	3	-1.36478	0.266372	-10.2472	0.000990692	0.0655329
H3083A10	Mm.297473	Pik3r4	phosphatidylinositol 3 kinase, regulatory subunit, polypeptide 4, p150	3	-0.46955	0.091707	-10.2402	0.00099266	0.0654004
H3143E05			EST	3	-0.526225	0.103335	-10.1848	0.00100859	0.0661849
H3011F02			EST	3	-0.58205	0.114489	-10.1678	0.00101353	0.0662456
H3109A08	Mm.324381		Mus musculus transcribed sequence with weak similarity to protein ref:NP_081764.1 (M.musculus) RIKEN cDNA 5730493B19 [Mus musculus]	3	-1.15027	0.226585	-10.1531	0.00101784	0.066264
H3058B02	Mm.2777	Tpd52	tumor protein D52	3	-0.48505	0.095637	-10.1435	0.00102066	0.0661861
H3018A05	Mm.21458	1810009A16Rik	RIKEN cDNA 1810009A16 gene	3	-1.25575	0.247854	-10.133	0.00102378	0.0661281
H3081E07	Mm.40370	Ssa2	Sjogren syndrome antigen A2	3	-0.516225	0.10214	-10.1082	0.00103116	0.0663445
H3004E09			EST	3	-1.2885	0.254944	-10.1081	0.00103119	0.0660883
H3095D10	Mm.279721	2310008M10Rik	RIKEN cDNA 2310008M10 gene	3	-0.52625	0.104409	-10.0805	0.00103948	0.0663613
H3066F05			EST	3	-0.59365	0.117942	-10.0668	0.00104362	0.0663688
H3078D08	Mm.26198		Mus musculus transcribed sequence with weak similarity to protein ref:NP_081764.1 (M.musculus) RIKEN cDNA 5730493B19 [Mus musculus]	3	-0.7441	0.14813	-10.0466	0.0010498	0.0665051
H3072G10	Mm.11815	B230312B02Rik	RIKEN cDNA B230312B02 gene	3	-0.5807	0.115865	-10.0238	0.00105682	0.0666932
T091	Mm.41911	Cyp46a1	cytochrome P450, family 46, subfamily a, polypeptide 1	3	-0.39555	0.079077	-10.0042	0.0010629	0.0668207
H3019B05	Mm.10987	Limd1	LIM domains containing 1	3	-1.02157	0.205011	-9.96607	0.00107485	0.0673149
H3096C02			EST	3	-0.380275	0.076338	-9.96289	0.00107585	0.0671226
H3059D07	Mm.24174	Aars	alanyl-tRNA synthetase	3	-0.57605	0.115826	-9.9468	0.00108096	0.0671867
H3026F09	Mm.258163	Tmem2	transmembrane protein 2	3	-1.13952	0.229282	-9.93994	0.00108315	0.0670696
H3004H05	Mm.289662	Ddx3y	DEAD (Asp-Glu-Ala-Asp) box polypeptide 3, Y-linked	3	-2.89465	0.582762	-9.93425	0.00108497	0.0669306
H3139B06	Mm.5400	Brd7	bromodomain containing 7	3	-0.733675	0.147841	-9.92522	0.00108786	0.0668587
H3048H06	Mm.291179	Xrn1	5'-3' exoribonuclease 1	3	-0.323525	0.065359	-9.89999	0.001096	0.0671086
H3141B09	Mm.291032	C330027G06Rik	RIKEN cDNA C330027G06 gene	3	-0.9159	0.185568	-9.87133	0.00110534	0.0674301
H3094B01	Mm.24176	9230102N17Rik	RIKEN cDNA 9230102N17 gene	3	-0.675875	0.136952	-9.87026	0.00110569	0.0672025
H3003B09	Mm.205421	F730017H24Rik	RIKEN cDNA F730017H24 gene	3	-0.3664	0.074643	-9.81734	0.00112323	0.0680176
H3008A12	Mm.277683	2210404G23Rik	RIKEN cDNA 2210404G23 gene	3	-0.695625	0.141745	-9.81519	0.00112396	0.0678121
H3001C12			EST	3	-0.971425	0.198148	-9.80505	0.00112736	0.0677693
H3100F12	Mm.257445	1500026N15Rik	RIKEN cDNA 1500026N15 gene	3	-0.758075	0.155061	-9.77776	0.0011366	0.0680759
H3028H10	Mm.4587	Ppic	peptidylprolyl isomerase C	3	-0.592675	0.121269	-9.77458	0.00113768	0.0678938
H3035B08	Mm.80484	B230215L03Rik	RIKEN cDNA B230215L03 gene	3	-0.47085	0.096739	-9.73443	0.00115147	0.0684686
H3031D05	Mm.295612	Copg	coatomer protein complex, subunit gamma	3	-0.842075	0.17306	-9.73162	0.00115244	0.06828
H3120G02	Mm.196464	Gnai2	guanine nucleotide binding protein, alpha inhibiting 2	3	-0.6471	0.133652	-9.68336	0.00116933	0.0690322
H3008E01	Mm.245357	G630041M05Rik	RIKEN cDNA G630041M05 gene	3	-0.59685	0.123386	-9.67453	0.00117245	0.0689694
H3040A09	Mm.248373	D630010I07	hypothetical protein D630010I07	3	-0.700125	0.144756	-9.67318	0.00117293	0.0687519
T476	Mm.10687	Brs3	bombesin-like receptor 3	3	-0.7408	0.153315	-9.66379	0.00117627	0.0687031
H3126B12	Mm.10091	Pkig	protein kinase inhibitor, gamma	3	-1.53347	0.317825	-9.64979	0.00118126	0.0687511
H3123G06	Mm.37607	BC003498	cDNA sequence BC00398	3	-1.03245	0.214868	-9.6101	0.00119559	0.06934
H3010D12	Mm.275847	Usp19	ubiquitin specific protease 19	3	-0.74415	0.15539	-9.57783	0.00120741	0.0697796
H3058D08	Mm.131761	Myh10	myosin heavy chain 10, non-muscle	3	-2.20855	0.462128	-9.55817	0.00121468	0.0699546
H3136G07	Mm.277928	Tes3	testis derived transcript 3	3	-0.227275	0.047618	-9.5457	0.00121933	0.0699774
H3028B09	Mm.212606	C330018J07Rik	RIKEN cDNA C330018J07 gene	3	-0.389875	0.0821	-9.4976	0.00123747	0.0707719
H3012C11	Mm.313790		Mus musculus adult male hippocampus cDNA, RIKEN full-length enriched library, clone:2900026A02 product:unknown EST, full insert sequence	3	-1.77982	0.375209	-9.48712	0.00124146	0.0707548
H3095H10	Mm.306568		Mus musculus transcribed sequence with weak similarity to protein pir:S12207 (M.musculus) S12207 hypothetical protein (B2 element) - mouse	3	-0.38795	0.081847	-9.47983	0.00124425	0.0706694
H3133E08	Mm.89324		Mus musculus 16 days neonate cerebellum cDNA, RIKEN full-length enriched library, clone:9630010G10 product:unknown EST, full insert sequence	3	-1.4221	0.300106	-9.47731	0.00124522	0.0704813
H3054E02	Mm.245446		Mus musculus RIKEN cDNA 1810043M20 gene, mRNA (cDNA clone IMAGE:5057410), partial cds	3	-0.7671	0.161934	-9.47423	0.00124641	0.0703066
H3059D12			EST	3	-0.69305	0.146308	-9.47383	0.00124656	0.0700754
H3144C09	Mm.213408	Ttc3	tetratricopeptide repeat domain 3	3	-0.8927	0.188515	-9.47087	0.0012477	0.0699009
H3076B06	Mm.35605	Cdh1	cadherin 1	3	-0.99795	0.210801	-9.46819	0.00124873	0.0697215
H3157B08	Mm.245446		Mus musculus RIKEN cDNA 1810043M20 gene, mRNA (cDNA clone IMAGE:5057410), partial cds	3	-0.8476	0.17959	-9.43928	0.00125994	0.0701096
H3122B10	Mm.227551	Ap1b1	adaptor protein complex AP-1, beta 1 subunit	3	-0.276525	0.058745	-9.41444	0.00126967	0.0704135
H3124B05	Mm.103382	Ppfibp1	PTPRF interacting protein, binding protein 1 (liprin beta 1)	3	-0.726175	0.154671	-9.38992	0.00127938	0.0707138
H3074C04	Mm.180003	Rps27a	ribosomal protein S27a	3	-0.215725	0.046091	-9.36078	0.00129105	0.0711201
P630	Mm.41981	Defb2	defensin beta 2	3	-0.804325	0.171909	-9.35757	0.00129235	0.0709541
H3140D02	Mm.174176		Mus musculus transcribed sequence with weak similarity to protein ref:NP_081764.1 (M.musculus) RIKEN cDNA 5730493B19 [Mus musculus]	3	-0.9381	0.200758	-9.34557	0.0012972	0.0709839
[truncated: 7,851 more rows]

## Sheet: EF T1_down_Vs_FC T1_down
ewing_tumor_first round_fdr_10_down_AND_lipo_tumor_first round_fdr_05_down
[truncated: 55 more rows]

[truncated: 3 more sheets: EF T1_up_Vs_FC T1_up, MPCEWSFLI1 Vs FUSCHOP fdr10 up, MPCEWSFLI1 Vs FUSCHOP fdr10down]
